# Supplementary material for: Asymmetric iminium ion-catalyzed conjugate addition of 2-hydroxycinnamaldehydes and 2-oxocarboxylic esters: synthesis of chiral polysubstituted bridged bicyclic ketals
Source: Royal Society of Chemistry journal article supplement (doi:10.1039/d3cc02739b), 2023-01-01

**Asymmetric iminium ion-catalyzed conjugate addition of 2-hydroxycinnamaldehydes and 2-oxocarboxylic esters: synthesis of chiral polysubstituted bridged bicyclic ketals**

Yong-Chao Ming,<sup>a</sup> Xue-Jiao Lv,<sup>a</sup> Ying-Han Chen,<sup>a</sup> Yan-Kai Liu<sup>\*ab</sup>

<sup>a</sup>Molecular Synthesis Center & Key Laboratory of Marine Drugs, Ministry of Education, School of Medicine and Pharmacy, Ocean University of China, 5 Yushan Road, Qingdao 266003, China.

<sup>b</sup>Laboratory for Marine Drugs and Bioproducts of Qingdao National Laboratory for Marine Science and Technology, Qingdao 266003, China

Email: liuyankai@ouc.edu.cn (Y.-K. Liu)

**Supporting Information**

## Contents

|                                                                                         |            |
|-----------------------------------------------------------------------------------------|------------|
| <b>A. General information .....</b>                                                     | <b>3</b>   |
| <b>B. General procedure for the synthesis of <math>\alpha</math>-Ketoesters 2 .....</b> | <b>4</b>   |
| <b>C. Optimization of the reaction conditions.....</b>                                  | <b>5</b>   |
| <b>D. Scope of the reaction .....</b>                                                   | <b>7</b>   |
| <b>E. Other reactions.....</b>                                                          | <b>21</b>  |
| E1. Synthesis of 8.....                                                                 | 21         |
| E2. Synthesis of 12 .....                                                               | 22         |
| <b>F. Synthetic transformation .....</b>                                                | <b>23</b>  |
| <b>G. 1 mmol scale reaction .....</b>                                                   | <b>32</b>  |
| <b>H. DFT calculation .....</b>                                                         | <b>34</b>  |
| H1. Computational methods .....                                                         | 34         |
| H2. Computational results .....                                                         | 35         |
| H3. Coordinates and energies of stationary points .....                                 | 36         |
| <b>I. NMR spectra and HPLC traces .....</b>                                             | <b>43</b>  |
| <b>J. Single crystal X-Ray diffraction data .....</b>                                   | <b>127</b> |
| <b>K. Proposed reaction mechanism .....</b>                                             | <b>128</b> |

## A. General information

The  $^1\text{H}$  and  $^{13}\text{C}$  NMR spectra were recorded at 600 MHz, 500 MHz or 400 MHz for  $^1\text{H}$  and at 150 MHz, 125 MHz or 100 MHz for  $^{13}\text{C}$ . The chemical shifts ( $\delta$ ) for  $^1\text{H}$  and  $^{13}\text{C}$  are given in ppm relative to residual signals of the solvents ( $\text{CDCl}_3$  at 7.26 ppm  $^1\text{H}$  NMR, 77.16 ppm  $^{13}\text{C}$  NMR.  $d_6$ -DMSO at 2.50 ppm  $^1\text{H}$  NMR, 39.52 ppm  $^{13}\text{C}$  NMR). Coupling constants are given in Hz. The following abbreviations are used to indicate the multiplicity: s, singlet; d, doublet; t, triplet; q, quartet; m, multiplet. High-resolution mass spectra (HRMS) were obtained from the Waters Q-Tof Ultima Global. X-ray data were obtained from Zhongke chemical technology service center. Optical rotations are reported as follows:  $[\alpha]_D^{20}$  (c in g per 100 mL, solvent:  $\text{CHCl}_3$ , MeOH).

Note: NMR signals containing common solvent contaminants were list.  $\text{H}_2\text{O}$  in  $\text{CDCl}_3$  at 1.56 ppm  $^1\text{H}$  NMR, and in  $d_6$ -DMSO at 3.33 ppm  $^1\text{H}$  NMR; Ethyl acetate in  $\text{CDCl}_3$  at 2.05 (s), 4.12 (q), 1.26 (t) ppm  $^1\text{H}$  NMR;  $\text{CH}_2\text{Cl}_2$  in  $\text{CDCl}_3$  at 5.30 (s) ppm  $^1\text{H}$  NMR; Grease in  $\text{CDCl}_3$  at 0.86 (m), 1.26 (br, s) ppm  $^1\text{H}$  NMR.

All the reactions were set up under air and using commercial solvents, without any precautions to exclude moisture, unless otherwise noted open air chemistry on the bench-top. Chromatographic purification of products was accomplished using force-flow chromatography (FC) on silica gel (300-400 mesh). For thin layer chromatography (TLC) analysis throughout this work, Merck pre-coated TLC plates (silica gel 60 GF254, 0.25 mm) were used, using UV light as the visualizing agent and a phosphomolybdic acid or basic aqueous potassium permanganate ( $\text{KMnO}_4$ ) as stain developing solutions. Organic solutions were concentrated under reduced pressure on a Büchi rotary evaporator.

HPLC analyses on chiral stationary phase were performed on a Hitachi Chromaster. Daicel Chiralpak IA, IB, IC, ID, OD-H or AD-H columns with *n*-hexane/*i*-PrOH as the eluent were used. HPLC traces were compared to racemic samples which prepared by mixture of two enantiomeric final products obtained using (*S*) and (*R*) catalyst.

Commercial reagents and solvents were purchased from Sigma Aldrich, Fluka, and Alfa Aesar used as received, without further purification. The 2-hydroxyinnamaldehyde **1** were prepared according to literature procedures. [1]

## B. General procedure for the synthesis of $\alpha$ -Ketoesters **2**

### The synthesis of $\alpha$ -Ketoesters **2b-2s**:

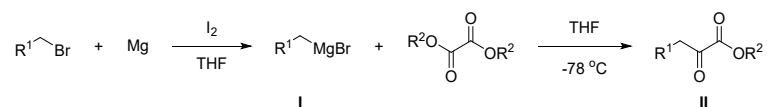

The  $\alpha$ -Ketoesters **2** were prepared according to literature procedures. [2]

**Step 1:** To a stirred suspension of magnesium turnings (2.2 mmol, 1.1 equiv.) in anhydrous THF (2 mL) was added a crystal of I<sub>2</sub> as an activator. Then bromide (2.4 mmol, 1.2 equiv.) in anhydrous THF (2 mL) was added dropwise. The suspension was stirred until magnesium was disappeared at room temperature, and the resulting Grignard reagent was used directly for the next step.

**Step 2:** To a solution of diethyl oxalate (2 mmol, 1.0 equiv.) in anhydrous THF (4 mL) at  $-78\text{ }^\circ\text{C}$  was added dropwise the Grignard reagents (commercially available or prepared as shown above). After stirring for 1 h at  $-78\text{ }^\circ\text{C}$ , the mixture was warmed to room temperature, quenched with a saturated solution of NH<sub>4</sub>Cl (5 mL), and extracted with ethyl acetate (3  $\times$  5 mL). The combined organic layers were dried over MgSO<sub>4</sub>, filtered, and concentrated in a rotary evaporator under vacuum. The residue was purified by silica gel column chromatography.

---

[1] Chen, Y.-H.; Sun, X.-L.; Guan, H.-S.; Liu, Y.-K., *J. Org. Chem.* **2017**, 82, 4774.

[2] Zhu, J.; Yuan, Y.; Wang, S.; Yao, Z.-J., *ACS Omega* **2017**, 2(8), 4665.



## C. Optimization of the reaction conditions

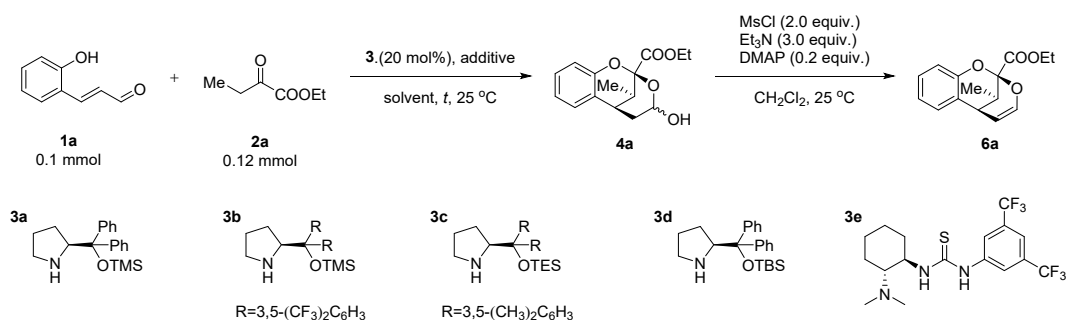

**Table S1: Optimization of the Reaction Catalyst, Solvent and Additive**

| entry <sup>[a]</sup> | catalyst  | solvent           | additive | t(h) <sup>[b]</sup> | yield (%) <sup>[c]</sup> | ee (%) <sup>[d]</sup> | dr (%) <sup>[e]</sup> |
|----------------------|-----------|-------------------|----------|---------------------|--------------------------|-----------------------|-----------------------|
| 1                    | <b>3a</b> | DCE               | NaOAc    | 3                   | 69                       | 99                    | 7:1                   |
| 2                    | <b>3b</b> | DCE               | NaOAc    | 48                  | 47                       | 99                    | 4:1                   |
| 3                    | <b>3c</b> | DCE               | NaOAc    | 4                   | 58                       | 99                    | 9:1                   |
| 4                    | <b>3d</b> | DCE               | NaOAc    | 5                   | 47                       | 99                    | 7:1                   |
| 5                    | <b>3a</b> | DCE               | BA       | 4.5                 | 76                       | 99                    | 9:1                   |
| 7                    | <b>3a</b> | DCE               | DABCO    | 3                   | 62                       | 99                    | 7:1                   |
| 8                    | <b>3a</b> | DCE               | DBU      | 2                   | 47                       | 99                    | 4:1                   |
| 9                    | <b>3a</b> | toluene           | NaOAc    | 3                   | 76                       | 99                    | 11:1                  |
| 10                   | <b>3a</b> | THF               | NaOAc    | >5.5                | 62                       | 99                    | 7:1                   |
| 11                   | <b>3a</b> | CHCl <sub>3</sub> | NaOAc    | 3                   | 54                       | 99                    | 11:1                  |
| 12                   | <b>3a</b> | EA                | NaOAc    | 5.5                 | 58                       | 99                    | 9:1                   |
| 13                   | <b>3a</b> | Et <sub>2</sub> O | NaOAc    | >5.5                | 47                       | 99                    | 4:1                   |

[a] Unless otherwise specified, all reactions were carried out in solvent (0.2 mL) with cat. (20 mol %), additive (20 mol%) at 25 °C. After workup, the mixture was purified by flash chromatography on silica gel to afford **4a**. Compound **4a** was respectively dissolved in CH<sub>2</sub>Cl<sub>2</sub> (0.1 mmol in 0.5 mL) at 0 °C. TEA (3.0 equiv.), MsCl (2.0 equiv.) and DMAP (0.2 equiv.) were added in order, then transferred to 25 °C. After full conversion of the second step, the residue was purified by flash chromatography on gel to give product **6a**. [b] For the first step. [c] Isolated yield of **6a** over two steps. [d] Determined by HPLC analyses of isolated compound **6a** on chiral stationary phases. [e] Determined by <sup>1</sup>H NMR analyses of isolated compound **6a**.

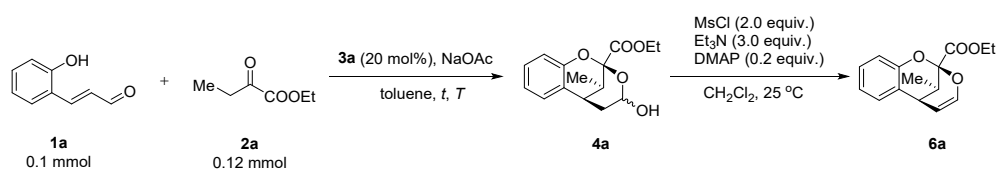

**Table S2: Optimization of the Reaction Temperature**

| entry <sup>[a]</sup> | catalyst  | additive | <i>T</i> (°C) | <i>t</i> (h) <sup>[b]</sup> | yield (%) <sup>[c]</sup> | ee (%) <sup>[d]</sup> | <i>dr</i> (%) <sup>[e]</sup> |
|----------------------|-----------|----------|---------------|-----------------------------|--------------------------|-----------------------|------------------------------|
| 1                    | <b>3a</b> | NaOAc    | 0             | 40                          | 43                       | 99                    | 10:1                         |
| 2 <sup>[f]</sup>     | <b>3a</b> | NaOAc    | 0             | 6                           | 62                       | 99                    | 5:1                          |
| 3 <sup>[f]</sup>     | <b>3a</b> | NaOAc    | 25            | 2.5                         | 51                       | 99                    | 4:1                          |
| 4                    | <b>3a</b> | NaOAc    | 40            | 2.5                         | 53                       | 99                    | 5:1                          |

[a] Unless otherwise specified, all reactions were carried out in solvent (0.2 mL) with cat. (20 mol %), additive (20 mol%) at 25 °C. After workup, the mixture was purified by flash chromatography on silica gel to afford **4a**. Compound **4a** was dissolved in CH<sub>2</sub>Cl<sub>2</sub> (0.1 mmol in 0.5 mL) at 0 °C. TEA (3.0 equiv.), MsCl (2.0 equiv.) and DMAP (0.2 equiv.) were added in order, then transferred to 25 °C. After full conversion of the second step, the residue was purified by flash chromatography on silica gel to give product **6a**. [b] For the first step. [c] Isolated yield of **6a** over two steps. [d] Determined by HPLC analyses of isolated compound **6a** on chiral stationary phases. [e] Determined by <sup>1</sup>H NMR analyses of isolated compound **6a**. [f] The reaction was carried out with **3e** (20 mol%).

DCE= dichloroethane

EA = ethyl acetate

THF = tetrahydrofuran

BA = benzoic acid

TEA = triethylamine

MsCl = methanesulfonyl chloride

DBU = 1,8-diazabicyclo[5,4,0]undec-7-ene

DMAP = 4-dimethylaminopyridine

DABCO = triethylenediamine

## D. Scope of the reaction

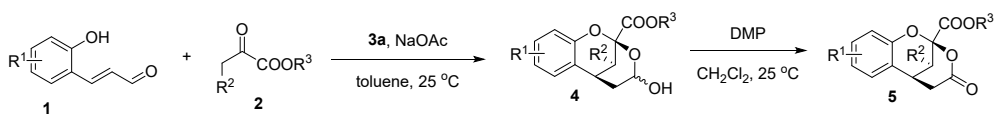

**General procedure of oxidation:** A glass vial equipped with a magnetic stirring bar was charged with catalyst **3a** (0.02 mmol, 6.5 mg, 20 mol%) in toluene (0.2 mL), then 2-hydroxycinnamaldehyde **1** (0.1 mmol, 1.0 equiv.), NaOAc (0.02 mmol, 1.6 mg, 20 mol%) and 2-oxocarboxylic ester **2** (0.12 mmol, 1.2 equiv.) was added. The reaction mixture was stirred at 25 °C for 3 h until the material **1** disappeared. After completion of the reaction, the crude product was purified by flash chromatography on silica gel (petroleum ether/ethyl acetate = 5/1) to afford **4**. Then the product **4** (1.0 equiv.) was dissolved in CH<sub>2</sub>Cl<sub>2</sub> (0.2 mmol in 1 mL). Dess-Martin Periodinane (DMP, 1.5 equiv.) was added to the reaction mixture. After full conversion of the reaction, the reaction mixture was purified by flash chromatography on silica gel (petroleum ether/ethyl acetate = 5/1) to give product **5a**, **5b** and **5i** for NMR and HPLC analysis.

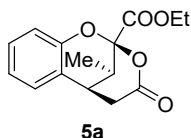

**5a** was obtained as a white solid 21 mg in 76% yield for two steps after column chromatography on silica gel (petroleum ether/ethyl acetate = 5/1). **<sup>1</sup>H NMR** (400 MHz, CDCl<sub>3</sub>) δ 7.3 (dd, *J* = 6.9, 1.5 Hz, 1H), 7.1 (dd, *J* = 7.6, 1.8 Hz, 1H), 7.1 (td, *J* = 8.0, 7.4, 1.2 Hz, 3H), 4.4 (ddd, *J* = 10.5, 7.1, 3.5 Hz, 2H), 3.1 – 3.0 (m, 2H), 2.9 – 2.8 (m, 1H), 2.8 (qd, *J* = 6.9, 1.7 Hz, 1H), 1.4 (t, *J* = 7.1 Hz, 4H), 1.0 (d, *J* = 6.9 Hz, 3H) ppm. **<sup>13</sup>C NMR** (100 MHz, CDCl<sub>3</sub>) δ 166.9, 164.6, 148.5, 129.5, 129.5, 123.5, 121.9, 117.9, 100.7, 63.0, 40.5, 34.7, 31.7, 14.1, 13.5 ppm. **HRMS:** [M+H]<sup>+</sup> *calcd.* for C<sub>15</sub>H<sub>17</sub>O<sub>5</sub><sup>+</sup> 277.1071, found 277.1072. **[α]<sub>D</sub><sup>20</sup>** -52.13 (*c* = 0.5 in CHCl<sub>3</sub>). The enantiomeric excess was determined by HPLC analysis on Daicel Chiralpak AD-H column [*n*-hexane/*i*-PrOH = 90/10, 1 mL/min], λ = 205 nm, *t*<sub>major</sub> = 14.15 min, *t*<sub>minor</sub> = 10.85 min, **ee** = 99%. The diastereomeric ratio was determined by <sup>1</sup>H NMR, **dr** = 11:1.

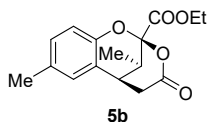

**5b** was obtained as a yellow solid 14 mg in 48% yield for two steps after column chromatography on silica gel (petroleum ether/ethyl acetate = 5/1). **<sup>1</sup>H NMR** (400 MHz, CDCl<sub>3</sub>) δ 7.0 (dd, *J* = 8.4, 2.2 Hz, 1H), 7.0 (d, *J* = 8.4 Hz, 1H), 6.9 (d, *J* = 2.2 Hz, 1H), 4.4 (dtt, *J* = 14.3, 7.1, 3.6 Hz, 2H), 3.0 – 2.9 (m, 2H), 2.9 (dd, *J* = 19.4, 3.7 Hz, 1H), 2.8 – 2.7 (m, 1H), 2.3 (s, 3H), 1.4 (t, *J* = 7.2 Hz, 4H), 1.0 (d, *J* = 6.9 Hz, 3H) ppm. **<sup>13</sup>C NMR** (100 MHz, CDCl<sub>3</sub>) δ 167.1, 164.7, 146.2, 133.0, 130.1, 129.7, 121.5, 117.6, 100.8, 63.0, 40.6, 34.7, 31.8, 20.6, 14.1, 13.5 ppm. **HRMS**: [M+H]<sup>+</sup> *calcd.* for C<sub>16</sub>H<sub>19</sub>O<sub>5</sub><sup>+</sup> 291.1227, found 291.1222. [α]<sub>D</sub><sup>20</sup> -86 (*c* = 0.8 in CHCl<sub>3</sub>). The enantiomeric excess was determined by HPLC analysis on Daicel Chiralpak AD-H column [*n*-hexane/*i*-PrOH = 90/10, 1 mL/min], λ = 205 nm, *t*<sub>major</sub> = 24.31 min, *t*<sub>minor</sub> = 9.96 min, **ee** = **97%**. The diastereomeric ratio was determined by <sup>1</sup>H NMR, **dr** >**20:1**.

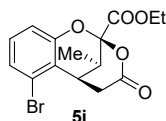

**5i** was obtained as a white solid 15 mg in 39% yield for two steps after column chromatography on silica gel (petroleum ether/ethyl acetate = 5/1). **<sup>1</sup>H NMR** (400 MHz, CDCl<sub>3</sub>) δ 7.2 (d, *J* = 1.1 Hz, 1H), 7.1 (t, *J* = 8.1 Hz, 1H), 6.9 (dd, *J* = 8.3, 1.1 Hz, 1H), 4.4 (qd, *J* = 7.2, 2.6 Hz, 2H), 3.4 (ddd, *J* = 5.6, 3.6, 1.6 Hz, 1H), 3.0 (dd, *J* = 18.7, 5.8 Hz, 1H), 2.8 (dt, *J* = 19.0, 1.4 Hz, 1H), 2.7 (qd, *J* = 7.0, 3.6 Hz, 1H), 1.4 (t, *J* = 7.1 Hz, 3H), 1.3 (d, *J* = 7.0 Hz, 3H) ppm. **<sup>13</sup>C NMR** (100 MHz, CDCl<sub>3</sub>) δ 166.5, 164.8, 150.1, 130.2, 126.7, 124.7, 123.2, 116.9, 101.2, 63.1, 33.4, 31.2, 30.6, 14.1, 12.5 ppm. **HRMS**: [M+H]<sup>+</sup> *calcd.* for C<sub>15</sub>H<sub>16</sub><sup>79</sup>BrO<sub>5</sub><sup>+</sup> 355.0176, found 355.0179; *calcd.* for C<sub>15</sub>H<sub>16</sub><sup>81</sup>BrO<sub>5</sub><sup>+</sup> 357.0155, found 357.0157. [α]<sub>D</sub><sup>20</sup> -71.62 (*c* = 0.7 in CHCl<sub>3</sub>). The enantiomeric excess was determined by HPLC analysis on Daicel Chiralpak ID column [*n*-hexane/*i*-PrOH = 90/10, 1 mL/min], λ = 205 nm, *t*<sub>major</sub> = 21.61 min, *t*<sub>minor</sub> = 23.84 min, **ee** = **91%**. The diastereomeric ratio was determined by <sup>1</sup>H NMR, **dr** = **7:1**.

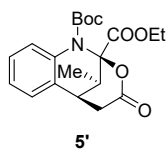

**5'** was obtained as a colorless oil 15 mg in 41% yield for two steps after column chromatography on silica gel (petroleum ether/ethyl acetate = 6/1). **<sup>1</sup>H NMR** (400 MHz, CDCl<sub>3</sub>)  $\delta$  7.2 (td,  $J$  = 7.8, 1.6 Hz, 1H), 7.1 (dd,  $J$  = 7.6, 1.6 Hz, 1H), 7.0 (td,  $J$  = 7.5, 1.2 Hz, 1H), 6.9 (dd,  $J$  = 8.1, 1.1 Hz, 1H), 4.2 (q,  $J$  = 7.2 Hz, 2H), 3.7 (dq,  $J$  = 8.6, 7.0 Hz, 1H), 3.3 (ddd,  $J$  = 8.8, 5.5, 3.5 Hz, 1H), 2.8 (dd,  $J$  = 5.8, 4.5 Hz, 2H), 1.6 (s, 9H), 1.2 (t,  $J$  = 7.1 Hz, 3H) 1.2 (d,  $J$  = 7.0 Hz, 3H) ppm. **<sup>13</sup>C NMR** (100 MHz, CDCl<sub>3</sub>)  $\delta$  196.4, 167.7, 160.4, 151.4, 136.9, 128.7, 128.1, 126.7, 124.4, 117.6, 85.2, 62.5, 44.2, 38.0, 34.5, 27.7, 13.9, 12.6 ppm. **HRMS**: [M+H]<sup>+</sup> *calcd.* for C<sub>20</sub>H<sub>26</sub>NO<sub>6</sub><sup>+</sup> 376.1755, found 376.1756. [ $\alpha$ ]<sub>D</sub><sup>20</sup> +24.72 ( $c$  = 1.0 in CHCl<sub>3</sub>). The enantiomeric excess was determined by HPLC analysis on Daicel Chiralpak IC column [*n*-hexane/*i*-PrOH = 90/10, 1 mL/min],  $\lambda$  = 205 nm,  $t_{major}$  = 35.62 min,  $t_{minor}$  = 23.18 min, **ee** = **98%**. The diastereomeric ratio was determined by <sup>1</sup>H NMR, **dr** >**20:1**.

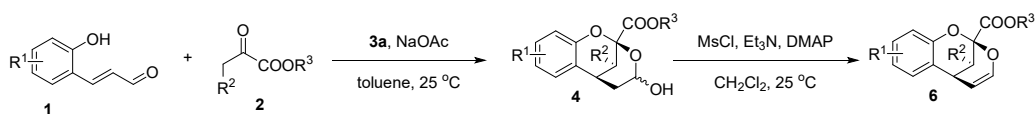

**General procedure of dehydration:** The method for obtaining product **4** has been described above. Then the product **4** (1.0 equiv.) was dissolved in CH<sub>2</sub>Cl<sub>2</sub> (0.2 mmol in 1 mL) at 0 °C in the ice bath. TEA (3.0 equiv.), MsCl (2.0 equiv.), DMAP (0.2 equiv.) were added to the reaction mixtures in order. After full conversion of the reaction, the reaction mixture was purified by flash chromatography on silica gel (petroleum ether/ethyl acetate = 100/1 to 10/1) to give product **6** for NMR and HPLC analysis.

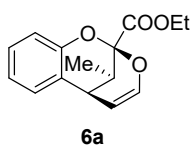

**6a** was obtained as a white solid 19 mg in 76% yield for two steps after column chromatography on silica gel (petroleum ether/ethyl acetate = 30/1). **<sup>1</sup>H NMR** (400 MHz,

CDCl<sub>3</sub>)  $\delta$  7.2 (ddd,  $J$  = 8.1, 7.2, 1.7 Hz, 1H), 7.1 (ddd,  $J$  = 11.4, 7.8, 1.5 Hz, 2H), 6.9 (td,  $J$  = 7.3, 1.3 Hz, 1H), 6.4 (d,  $J$  = 5.8 Hz, 1H), 5.3 (dd,  $J$  = 7.1, 5.8 Hz, 1H), 4.4 – 4.3 (m, 2H), 3.2 (dd,  $J$  = 7.1, 2.9 Hz, 1H), 2.6 (qd,  $J$  = 6.9, 2.9 Hz, 1H), 1.4 (t,  $J$  = 7.2 Hz, 3H), 0.9 (d,  $J$  = 6.9 Hz, 3H) ppm. **<sup>13</sup>C NMR** (100 MHz, CDCl<sub>3</sub>)  $\delta$  166.6, 150.9, 140.6, 128.0, 127.7, 124.3, 121.9, 116.6, 108.0, 98.3, 62.4, 33.6, 30.5, 14.1, 13.1 ppm. **HRMS**: [M+H]<sup>+</sup> *calcd.* for C<sub>15</sub>H<sub>17</sub>O<sub>4</sub><sup>+</sup> 261.1121, found 261.1125. [ $\alpha$ ]<sub>D</sub><sup>20</sup> -228.93 ( $c$  = 0.50 in CHCl<sub>3</sub>). The enantiomeric excess was determined by HPLC analysis on Daicel Chiralpak OD-H column [*n*-hexane/*i*-PrOH = 90/10, 1 mL/min],  $\lambda$  = 210 nm,  $t_{major}$  = 8.47 min,  $t_{minor}$  = 6.05 min, **ee** = **99%**. The diastereomeric ratio was determined by <sup>1</sup>H NMR, **dr** = **11:1**.

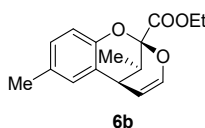

**6b** was obtained as a yellow solid 17 mg in 62% yield for two steps after column chromatography on silica gel (petroleum ether/ethyl acetate = 50/1). **<sup>1</sup>H NMR** (400 MHz, CDCl<sub>3</sub>)  $\delta$  7.0 – 6.9 (m, 2H), 6.8 (d,  $J$  = 1.9 Hz, 1H), 6.4 (d,  $J$  = 5.7 Hz, 1H), 5.3 (dd,  $J$  = 7.2, 5.8 Hz, 1H), 4.4 – 4.3 (m, 2H), 3.1 (dd,  $J$  = 7.1, 2.9 Hz, 1H), 2.6 (qd,  $J$  = 7.0, 2.9 Hz, 1H), 2.3 (s, 3H), 1.4 (t,  $J$  = 7.1 Hz, 3H), 0.9 (d,  $J$  = 6.9 Hz, 3H) ppm. **<sup>13</sup>C NMR** (100 MHz, CDCl<sub>3</sub>)  $\delta$  166.7, 148.6, 140.7, 131.2, 128.4, 128.2, 124.0, 116.3, 108.0, 98.3, 62.4, 33.6, 30.5, 20.6, 14.1, 13.1 ppm. **HRMS**: [M+H]<sup>+</sup> *calcd.* for C<sub>16</sub>H<sub>19</sub>O<sub>4</sub><sup>+</sup> 275.1278, found 275.1273. [ $\alpha$ ]<sub>D</sub><sup>20</sup> -67.64 ( $c$  = 0.75 in CHCl<sub>3</sub>). The diastereomeric ratio was determined by <sup>1</sup>H NMR, **dr** = **9:1**.

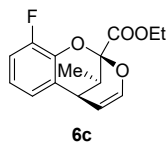

**6c** was obtained as a white solid 15 mg in 54% yield for two steps after column chromatography on silica gel (petroleum ether/ethyl acetate = 50/1). **<sup>1</sup>H NMR** (400 MHz, CDCl<sub>3</sub>)  $\delta$  7.0 – 6.9 (m, 1H), 6.9 – 6.8 (m, 2H), 6.4 (d,  $J$  = 5.7 Hz, 1H), 5.3 (dd,  $J$  = 7.1, 5.8 Hz, 1H), 4.5 – 4.3 (m, 2H), 3.2 (ddd,  $J$  = 7.2, 3.0, 1.3 Hz, 1H), 2.6 (qd,  $J$  = 6.9, 2.9 Hz, 1H), 1.4 (t,  $J$  = 7.1 Hz, 3H), 0.9 (d,  $J$  = 7.0 Hz, 3H) ppm. **<sup>13</sup>C NMR** (100 MHz, CDCl<sub>3</sub>)  $\delta$  166.1, 152.1, 149.6,

140.9, 127.1, 122.9 (d,  $J = 3.6$  Hz), 121.8 (d,  $J = 6.7$  Hz), 114.8 (d,  $J = 17.9$  Hz), 107.5, 98.1, 62.6, 33.3 (d,  $J = 2.7$  Hz), 30.4, 14.1, 13.0 ppm.  $^{19}\text{F}$  NMR (376 MHz,  $\text{CDCl}_3$ )  $\delta$  -134.1 ppm. **HRMS**:  $[\text{M}+\text{H}]^+$  *calcd.* for  $\text{C}_{15}\text{H}_{16}\text{FO}_4^+$  279.1027, found 279.1025.  $[\alpha]_{\text{D}}^{20}$  -52.27 ( $c = 0.75$  in  $\text{CHCl}_3$ ). The enantiomeric excess was determined by HPLC analysis on Daicel Chiralpak AD-H column [ $n$ -hexane/ $i$ -PrOH = 90/10, 1 mL/min],  $\lambda = 205$  nm,  $t_{\text{major}} = 5.16$  min,  $t_{\text{minor}} = 5.51$  min, **ee** = **98%**. The diastereomeric ratio was determined by  $^1\text{H}$  NMR, **dr** >**20:1**.

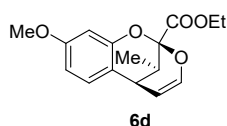

**6d** was obtained as a yellow solid 17 mg in 48% yield for two steps after column chromatography on silica gel (petroleum ether/ethyl acetate = 30/1).  $^1\text{H}$  NMR (400 MHz,  $\text{CDCl}_3$ )  $\delta$  6.9 (d,  $J = 8.3$  Hz, 1H), 6.7 (d,  $J = 2.5$  Hz, 1H), 6.5 (dd,  $J = 8.3, 2.5$  Hz, 1H), 6.4 (d,  $J = 5.8$  Hz, 1H), 5.3 (dd,  $J = 7.1, 5.8$  Hz, 1H), 4.5 – 4.3 (m, 2H), 3.8 (s, 3H), 3.1 (dd,  $J = 7.1, 3.0$  Hz, 1H), 2.6 (qd,  $J = 6.9, 2.9$  Hz, 1H), 1.4 (t,  $J = 7.1$  Hz, 3H), 0.9 (d,  $J = 6.9$  Hz, 3H) ppm.  $^{13}\text{C}$  NMR (100 MHz,  $\text{CDCl}_3$ )  $\delta$  166.6, 159.3, 151.6, 140.3, 128.3, 116.5, 108.5, 108.4, 101.9, 98.3, 62.4, 55.4, 32.8, 30.7, 14.1, 13.1 ppm. **HRMS**:  $[\text{M}+\text{H}]^+$  *calcd.* for  $\text{C}_{16}\text{H}_{19}\text{O}_5^+$  291.1227, found 291.1224  $[\alpha]_{\text{D}}^{20}$  -101.80 ( $c = 0.85$  in  $\text{CHCl}_3$ ). The enantiomeric excess was determined by HPLC analysis on Daicel Chiralpak IC column [ $n$ -hexane/ $i$ -PrOH = 90/10, 1 mL/min],  $\lambda = 205$  nm,  $t_{\text{major}} = 15.90$  min,  $t_{\text{minor}} = 32.61$  min, **ee** = **99%**. The diastereomeric ratio was determined by  $^1\text{H}$  NMR, **dr** >**20:1**.

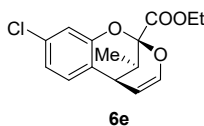

**6e** was obtained as a white solid 16 mg in 54% yield for two steps after column chromatography on silica gel (petroleum ether/ethyl acetate = 40/1).  $^1\text{H}$  NMR (400 MHz,  $\text{CDCl}_3$ )  $\delta$  7.1 (d,  $J = 2.0$  Hz, 1H), 7.0 (d,  $J = 8.0$  Hz, 1H), 6.9 (dd,  $J = 8.0, 2.0$  Hz, 1H), 6.4 (d,  $J = 5.8$  Hz, 1H), 5.3 (dd,  $J = 7.1, 5.8$  Hz, 1H), 4.4 (qq,  $J = 10.8, 7.1$  Hz, 2H), 3.1 (dd,  $J = 7.1, 3.0$  Hz, 1H), 2.6 (qd,  $J = 7.0, 3.0$  Hz, 1H), 1.4 (t,  $J = 7.1$  Hz, 3H), 0.9 (d,  $J = 6.9$  Hz, 3H) ppm.  $^{13}\text{C}$  NMR (100 MHz,  $\text{CDCl}_3$ )  $\delta$  166.2, 151.6, 140.7, 132.8, 128.7, 123.0, 122.0, 117.0, 107.7, 98.3,

62.5, 33.1, 30.3, 14.1, 13.0 ppm. **HRMS**:  $[M+H]^+$  *calcd.* for  $C_{15}H_{16}^{35}ClO_4^+$  295.0732, found 295.0730; *calcd.* for  $C_{15}H_{16}^{37}ClO_4^+$  297.0301, found 297.0303.  $[\alpha]_D^{20}$  -167.90 ( $c = 0.70$  in  $CHCl_3$ ). The enantiomeric excess was determined by HPLC analysis on Daicel Chiralpak Id column [ $n$ -hexane/ $i$ -PrOH = 90/10, 1 mL/min],  $\lambda = 205$  nm,  $t_{major} = 7.15$  min,  $t_{minor} = 6.51$  min, **ee** = **99%**. The diastereomeric ratio was determined by  $^1H$  NMR, **dr** >**20:1**.

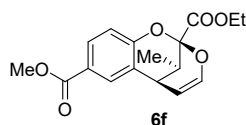

**6f** was obtained as a white solid 17 mg in 53% yield for two steps after column chromatography on silica gel (petroleum ether/ethyl acetate = 20/1).  **$^1H$  NMR** (400 MHz,  $CDCl_3$ )  $\delta$  7.8 (dd,  $J = 8.5, 2.2$  Hz, 1H), 7.7 (d,  $J = 2.1$  Hz, 1H), 7.0 (d,  $J = 8.5$  Hz, 1H), 6.3 (d,  $J = 5.8$  Hz, 1H), 5.3 (dd,  $J = 7.1, 5.8$  Hz, 1H), 4.4 – 4.2 (m, 2H), 3.8 (s, 3H), 3.2 (dd,  $J = 7.1, 3.0$  Hz, 1H), 2.6 (qd,  $J = 6.9, 2.9$  Hz, 1H), 1.3 (t,  $J = 7.1$  Hz, 3H), 0.8 (d,  $J = 7.0$  Hz, 3H) ppm.  **$^{13}C$  NMR** (100 MHz,  $CDCl_3$ )  $\delta$  166.6, 166.1, 155.0, 140.6, 129.9, 129.7, 124.5, 123.8, 116.5, 107.7, 98.5, 62.6, 52.0, 33.4, 30.3, 14.1, 13.0 ppm. **HRMS**:  $[M+H]^+$  *calcd.* for  $C_{17}H_{19}O_6^+$  319.1176, found 319.1176.  $[\alpha]_D^{20}$  -121.18 ( $c = 0.85$  in  $CHCl_3$ ). The enantiomeric excess was determined by HPLC analysis on Daicel Chiralpak ID column [ $n$ -hexane/ $i$ -PrOH = 90/10, 1 mL/min],  $\lambda = 205$  nm,  $t_{major} = 12.22$  min,  $t_{minor} = 11.21$  min, **ee** = **99%**. The diastereomeric ratio was determined by  $^1H$  NMR, **dr** >**20:1**.

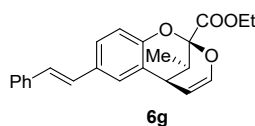

**6g** was obtained as a white solid 17 mg in 47% yield for two steps after column chromatography on silica gel (petroleum ether/ethyl acetate = 50/1).  **$^1H$  NMR** (400 MHz,  $CDCl_3$ )  $\delta$  7.5 – 7.5 (m, 2H), 7.3 (t,  $J = 7.7$  Hz, 3H), 7.3 – 7.2 (m, 2H), 7.1 (d,  $J = 8.5$  Hz, 1H), 7.0 (d,  $J = 5.1$  Hz, 2H), 6.4 (d,  $J = 5.8$  Hz, 1H), 5.3 (dd,  $J = 7.2, 5.7$  Hz, 1H), 4.5 – 4.3 (m, 2H), 3.2 (dd,  $J = 7.1, 2.9$  Hz, 1H), 2.6 (qd,  $J = 6.9, 2.9$  Hz, 1H), 1.4 (t,  $J = 7.1$  Hz, 3H), 0.9 (d,  $J = 7.0$  Hz, 3H) ppm.  **$^{13}C$  NMR** (100 MHz,  $CDCl_3$ )  $\delta$  166.5, 150.6, 140.7, 137.5, 131.4, 128.7, 127.9, 127.4, 127.3, 126.3, 126.1, 126.0, 124.6, 116.9, 107.9, 62.5, 33.7, 30.5, 14.2, 13.1 ppm.



**HRMS:**  $[M+H]^+$  *calcd.* for  $C_{23}H_{23}O_4^+$  363.1591, found 363.1591.  $[\alpha]_D^{20}$  -206.12 ( $c = 0.85$  in  $CHCl_3$ ). The enantiomeric excess was determined by HPLC analysis on Daicel Chiralpak AD-H column [*n*-hexane/*i*-PrOH = 90/10, 1 mL/min],  $\lambda = 205$  nm,  $t_{major} = 13.05$  min,  $t_{minor} = 9.30$  min, **ee** = **99%**. The diastereomeric ratio was determined by  $^1H$  NMR, **dr** = **14:1**.

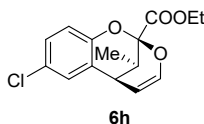

**6h** was obtained as a white solid 16 mg in 54% yield for two steps after column chromatography on silica gel (petroleum ether/ethyl acetate = 30/1).  $^1H$  NMR (400 MHz,  $CDCl_3$ )  $\delta$  7.1 (dd,  $J = 8.6, 2.5$  Hz, 1H), 7.1 – 7.0 (m, 2H), 6.4 (d,  $J = 5.8$  Hz, 1H), 5.3 (dd,  $J = 7.2, 5.7$  Hz, 1H), 4.5 – 4.3 (m, 2H), 3.1 (dd,  $J = 7.1, 2.9$  Hz, 1H), 2.6 (qd,  $J = 7.0, 2.9$  Hz, 1H), 1.4 (t,  $J = 7.1$  Hz, 3H), 0.9 (d,  $J = 7.0$  Hz, 3H) ppm.  $^{13}C$  NMR (100 MHz,  $CDCl_3$ )  $\delta$  166.3, 149.6, 141.0, 127.7, 127.6, 126.5, 126.0, 117.9, 107.4, 98.3, 62.5, 33.5, 30.2, 14.1, 13.0 ppm. **HRMS:**  $[M+H]^+$  *calcd.* for  $C_{15}H_{16}^{35}ClO_4^+$  295.0732, found 295.0733; *calcd.*  $C_{15}H_{16}^{37}ClO_4^+$  297.0703, found 297.0702.  $[\alpha]_D^{20}$  -148.36 ( $c = 0.75$  in  $CHCl_3$ ). The enantiomeric excess was determined by HPLC analysis on Daicel Chiralpak IB column [*n*-hexane/*i*-PrOH = 90/10, 1 mL/min],  $\lambda = 205$  nm,  $t_{major} = 19.75$  min,  $t_{minor} = 11.13$  min, **ee** = **98%**. The diastereomeric ratio was determined by  $^1H$  NMR, **dr** > **20:1**.

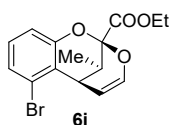

**6i** was obtained as a white solid 15 mg in 34% yield for two steps after column chromatography on silica gel (petroleum ether/ethyl acetate = 40/1).  $^1H$  NMR (400 MHz,  $CDCl_3$ )  $\delta$  7.1 (dd,  $J = 7.9, 1.3$  Hz, 1H), 7.0 (t,  $J = 8.0$  Hz, 1H), 6.9 (dt,  $J = 8.1, 1.0$  Hz, 1H), 6.5 (d,  $J = 5.8$  Hz, 1H), 5.1 (td,  $J = 6.2, 1.6$  Hz, 1H), 4.4 (qq,  $J = 10.8, 7.2$  Hz, 2H), 3.6 (dd,  $J = 6.6, 2.2$  Hz, 1H), 2.4 (qt,  $J = 6.8, 1.9$  Hz, 1H), 1.4 (t,  $J = 7.1$  Hz, 3H), 1.1 (d,  $J = 6.8$  Hz, 3H) ppm.  $^{13}C$  NMR (100 MHz,  $CDCl_3$ )  $\delta$  166.4, 152.7, 140.9, 128.7, 128.2, 125.1, 121.1, 115.6, 101.9, 98.1, 62.5, 33.3, 30.2, 14.1, 12.6 ppm. **HRMS:**  $[M+H]^+$  *calcd.* for  $C_{15}H_{16}^{79}BrO_4^+$  339.0227,

found 339.0225; *calcd.* for  $C_{15}H_{16}^{81}BrO_4^+$  341.0207, found 341.0209.  $[\alpha]_D^{20}$  -106.86 ( $c = 0.35$  in  $CHCl_3$ ). The diastereomeric ratio was determined by  $^1H$  NMR, **dr** = 5:1.

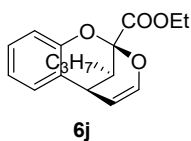

**6j** was obtained as a yellow oil 12 mg in 42% yield for two steps after column chromatography on silica gel (petroleum ether/ethyl acetate = 75/1).  $^1H$  NMR (400 MHz,  $CDCl_3$ )  $\delta$  7.2 (td,  $J = 7.8, 1.7$  Hz, 1H), 7.1 – 7.0 (m, 2H), 6.9 (td,  $J = 7.3, 1.3$  Hz, 1H), 6.4 (d,  $J = 5.7$  Hz, 1H), 5.3 (dd,  $J = 7.2, 5.7$  Hz, 1H), 4.5 – 4.3 (m, 3H), 3.3 (dd,  $J = 7.3, 2.9$  Hz, 1H), 2.5 (dt,  $J = 10.6, 3.1$  Hz, 1H), 1.4 (t,  $J = 7.1$  Hz, 3H), 1.3 – 1.3 (m, 1H), 1.2 (ddt,  $J = 15.7, 9.5, 2.8$  Hz, 2H), 1.1 – 1.0 (m, 1H), 0.8 (t,  $J = 7.1$  Hz, 3H) ppm.  $^{13}C$  NMR (100 MHz,  $CDCl_3$ )  $\delta$  166.8, 151.1, 140.8, 127.9, 127.7, 124.2, 121.8, 116.6, 107.7, 98.4, 62.4, 35.2, 30.3, 28.4, 19.8, 14.1, 13.8 ppm. **HRMS**:  $[M+H]^+$  *calcd.* for  $C_{17}H_{21}O_4^+$  289.1434, found 289.1431.  $[\alpha]_D^{20}$  -56.00 ( $c = 0.60$  in  $CHCl_3$ ). The enantiomeric excess was determined by HPLC analysis on Daicel Chiralpak ID column [ $n$ -hexane/ $i$ -PrOH = 90/10, 1 mL/min],  $\lambda = 205$  nm,  $t_{major} = 21.63$  min,  $t_{minor} = 48.50$  min, **ee** = 99%. The diastereomeric ratio was determined by  $^1H$  NMR, **dr** = 8:1.

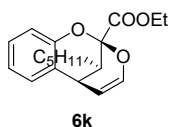

**6k** was obtained as a colorless oil 14 mg in 44% yield for two steps after column chromatography on silica gel (petroleum ether/ethyl acetate = 75/1).  $^1H$  NMR (400 MHz,  $CDCl_3$ )  $\delta$  7.1 (td,  $J = 7.8, 7.3, 1.7$  Hz, 1H), 7.1 – 7.0 (m, 2H), 6.9 (td,  $J = 7.3, 1.2$  Hz, 1H), 6.4 (d,  $J = 5.7$  Hz, 1H), 5.3 (dd,  $J = 7.2, 5.7$  Hz, 1H), 4.4 – 4.3 (m, 2H), 3.3 (dd,  $J = 7.3, 2.9$  Hz, 1H), 2.4 (dt,  $J = 10.5, 2.9$  Hz, 1H), 1.4 (t,  $J = 7.1$  Hz, 3H), 1.3 – 1.1 (m, 8H), 0.8 (t,  $J = 6.7$  Hz, 3H) ppm.  $^{13}C$  NMR (150 MHz,  $CDCl_3$ )  $\delta$  166.8, 151.2, 140.9, 127.9, 127.7, 124.3, 121.9, 116.7, 107.7, 98.5, 62.4, 35.5, 31.4, 30.4, 26.3, 26.2, 22.4, 14.2, 14.0 ppm. **HRMS**:  $[M+H]^+$  *calcd.* for  $C_{19}H_{25}O_4^+$  317.1747, found 317.1747.  $[\alpha]_D^{20}$  -53.68 ( $c = 1.00$  in  $CHCl_3$ ). The enantiomeric excess was determined by HPLC analysis on Daicel Chiralpak AD-H column

[*n*-hexane/*i*-PrOH = 90/10, 1 mL/min],  $\lambda$  = 205 nm,  $t_{major}$  = 4.67 min,  $t_{minor}$  = 6.6 min, **ee** = **99%**. The diastereomeric ratio was determined by  $^1\text{H}$  NMR, **dr** >**20:1**.

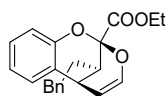

**6l**

**6l** was obtained as a colorless oil 12 mg in 34% yield for two steps after column chromatography on silica gel (petroleum ether/ethyl acetate = 10/1).  $^1\text{H}$  NMR (400 MHz,  $\text{CDCl}_3$ )  $\delta$  7.2 (d,  $J$  = 7.5 Hz, 2H), 7.2 – 7.1 (m, 2H), 7.1 – 7.0 (m, 4H), 7.0 – 6.9 (m, 1H), 6.4 (d,  $J$  = 5.7 Hz, 1H), 5.3 (dd,  $J$  = 7.2, 5.7 Hz, 1H), 4.3 (dddd,  $J$  = 14.9, 10.7, 7.1, 3.6 Hz, 2H), 3.3 (dd,  $J$  = 7.3, 2.9 Hz, 1H), 2.6 (ddd,  $J$  = 14.7, 9.4, 5.6 Hz, 1H), 2.6 – 2.5 (m, 1H), 2.5 (dd,  $J$  = 10.5, 3.1 Hz, 1H), 1.6 (ddt,  $J$  = 13.3, 6.3, 3.2 Hz, 1H), 1.3 (t,  $J$  = 7.1 Hz, 3H) ppm.  $^{13}\text{C}$  NMR (100 MHz,  $\text{CDCl}_3$ )  $\delta$  166.6, 151.2, 140.9, 140.8, 128.5, 128.3, 128.2, 127.9, 127.8, 126.1, 124.0, 122.0, 116.7, 107.5, 98.2, 62.5, 35.0, 32.9, 30.4, 27.9, 14.1 ppm. **HRMS**:  $[\text{M}+\text{H}]^+$  *calcd.* for  $\text{C}_{22}\text{H}_{23}\text{O}_4^+$  351.1591, found 351.1588.  $[\alpha]_{\text{D}}^{20}$  -118.00 ( $c$  = 0.60 in  $\text{CHCl}_3$ ). The enantiomeric excess was determined by HPLC analysis on Daicel Chiralpak OD-H column [*n*-hexane/*i*-PrOH = 90/10, 1 mL/min],  $\lambda$  = 205 nm,  $t_{major}$  = 6.02 min,  $t_{minor}$  = 8.79 min, **ee** = **97%**. The diastereomeric ratio was determined by  $^1\text{H}$  NMR, **dr** = **8:1**.

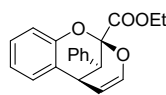

**6m**

**6m** was obtained as a yellow solid 14 mg in 42% yield for two steps after column chromatography on silica gel (petroleum ether/ethyl acetate = 50/1).  $^1\text{H}$  NMR (400 MHz,  $\text{CDCl}_3$ )  $\delta$  7.2 – 7.2 (m, 2H), 7.1 – 7.1 (m, 3H), 7.1 (dd,  $J$  = 6.9, 3.0 Hz, 2H), 6.9 – 6.8 (m, 2H), 6.5 (d,  $J$  = 5.8 Hz, 1H), 5.4 (dd,  $J$  = 7.0, 5.8 Hz, 1H), 4.3 – 4.1 (m, 2H), 3.9 (d,  $J$  = 2.8 Hz, 1H), 3.5 (dd,  $J$  = 7.1, 2.8 Hz, 1H), 1.0 (t,  $J$  = 7.1 Hz, 3H) ppm.  $^{13}\text{C}$  NMR (100 MHz,  $\text{CDCl}_3$ )  $\delta$  166.1, 151.9, 140.6, 136.5, 128.4, 127.9, 127.8, 127.3, 123.9, 122.2, 116.5, 108.8, 97.4, 62.3, 42.3, 35.5, 13.7 ppm. **HRMS**:  $[\text{M}+\text{H}]^+$  *calcd.* for  $\text{C}_{20}\text{H}_{19}\text{O}_4^+$  323.1278, found 323.1277.  $[\alpha]_{\text{D}}^{20}$  -23.67 ( $c$  = 0.69 in  $\text{CHCl}_3$ ). The enantiomeric excess was determined by HPLC analysis on Daicel Chiralpak AD-H column [*n*-hexane/*i*-PrOH = 90/10, 1 mL/min],  $\lambda$  = 205 nm,  $t_{major}$  =

7.88 min,  $t_{\text{minor}} = 7.38$  min, **ee** = **92%**. The diastereomeric ratio was determined by  $^1\text{H}$  NMR, **dr** > **20:1**.

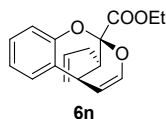

**6n** was obtained as a white solid 13 mg in 45% yield for two steps after column chromatography on silica gel (petroleum ether/ethyl acetate = 100/1).  $^1\text{H}$  NMR (400 MHz,  $\text{CDCl}_3$ )  $\delta$  7.2 (ddd,  $J = 8.7, 7.2, 1.7$  Hz, 1H), 7.1 (dd,  $J = 8.2, 1.3$  Hz, 1H), 7.0 (dd,  $J = 7.5, 1.7$  Hz, 1H), 6.9 (td,  $J = 7.3, 1.3$  Hz, 1H), 6.4 (d,  $J = 5.7$  Hz, 1H), 5.7 (dddd,  $J = 17.0, 10.1, 8.3, 5.8$  Hz, 1H), 5.3 – 5.3 (m, 1H), 5.0 (d,  $J = 10.1$  Hz, 1H), 4.8 (dq,  $J = 17.0, 1.6$  Hz, 1H), 4.4 – 4.3 (m, 2H), 3.3 (dd,  $J = 7.3, 2.9$  Hz, 1H), 2.5 – 2.5 (m, 1H), 2.2 – 2.1 (m, 1H), 1.7 – 1.7 (m, 1H), 1.4 (t,  $J = 7.1$  Hz, 3H) ppm.  $^{13}\text{C}$  NMR (100 MHz,  $\text{CDCl}_3$ )  $\delta$  166.6, 151.1, 140.8, 134.3, 128.0, 127.8, 123.9, 122.0, 117.8, 116.6, 107.7, 97.9, 62.5, 35.1, 31.1, 30.1, 14.1 ppm. **HRMS**:  $[\text{M}+\text{H}]^+$  *calcd.* for  $\text{C}_{17}\text{H}_{19}\text{O}_4^+$  287.1278, found 287.1274.  $[\alpha]_{\text{D}}^{20}$  -126.46 ( $c = 0.65$  in  $\text{CHCl}_3$ ). The enantiomeric excess was determined by HPLC analysis on Daicel Chiralpak AD-H column [ $n$ -hexane/ $i$ -PrOH = 90/10, 1 mL/min],  $\lambda = 205$  nm,  $t_{\text{major}} = 4.98$  min,  $t_{\text{minor}} = 5.99$  min, **ee** = **99%**. The diastereomeric ratio was determined by  $^1\text{H}$  NMR, **dr** = **8:1**.

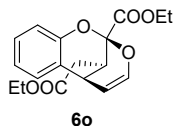

**6o** was obtained as a colorless oil 12 mg in 34% yield for two steps after column chromatography on silica gel (petroleum ether/ethyl acetate = 15/1).  $^1\text{H}$  NMR (400 MHz,  $\text{CDCl}_3$ )  $\delta$  7.2 – 7.1 (m, 1H), 7.1 – 7.0 (m, 2H), 6.9 (td,  $J = 7.4, 1.2$  Hz, 1H), 6.4 (d,  $J = 5.8$  Hz, 1H), 5.3 (dd,  $J = 7.3, 5.7$  Hz, 1H), 4.4 – 4.3 (m, 2H), 4.1 (q,  $J = 7.1$  Hz, 2H), 3.4 (dd,  $J = 7.3, 2.9$  Hz, 1H), 3.0 (ddd,  $J = 9.5, 3.9, 2.9$  Hz, 1H), 2.4 (dd,  $J = 17.0, 3.9$  Hz, 1H), 2.0 (dd,  $J = 16.9, 9.5$  Hz, 1H), 1.4 (t,  $J = 7.1$  Hz, 3H), 1.2 (t,  $J = 7.2$  Hz, 3H) ppm.  $^{13}\text{C}$  NMR (100 MHz,  $\text{CDCl}_3$ )  $\delta$  171.2, 166.3, 150.8, 140.7, 128.2, 128.0, 123.8, 122.2, 116.8, 107.6, 97.2, 62.7, 60.8, 32.3, 32.2, 31.4, 14.1, 14.1 ppm. **HRMS**:  $[\text{M}+\text{H}]^+$  *calcd.* for  $\text{C}_{18}\text{H}_{21}\text{O}_6^+$  333.1333, found 333.1333.  $[\alpha]_{\text{D}}^{20}$  -118.22 ( $c = 0.60$  in  $\text{CHCl}_3$ ). The enantiomeric excess was determined by HPLC analysis on Daicel Chiralpak AD-H column [ $n$ -hexane/ $i$ -PrOH = 90/10, 1 mL/min],  $\lambda = 220$

nm,  $t_{major}$  = 7.24 min,  $t_{minor}$  = 14.75 min, **ee** >99%. The diastereomeric ratio was determined by  $^1\text{H}$  NMR, **dr** = 7:1.

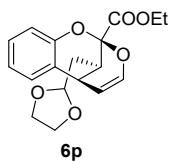

**6p** was obtained as a yellow oil 7.5 mg in 23% yield for two steps after column chromatography on silica gel (petroleum ether/ethyl acetate = 60/1).  $^1\text{H}$  NMR (400 MHz,  $\text{CDCl}_3$ )  $\delta$  7.1 (ddd,  $J$  = 8.2, 7.2, 1.7 Hz, 1H), 7.1 – 7.0 (m, 2H), 6.9 – 6.9 (m, 1H), 6.4 (d,  $J$  = 5.7 Hz, 1H), 5.3 (dd,  $J$  = 7.3, 5.7 Hz, 1H), 4.9 (t,  $J$  = 4.7 Hz, 1H), 4.4 – 4.3 (m, 2H), 3.9 – 3.9 (m, 2H), 3.8 – 3.8 (m, 2H), 3.5 (dd,  $J$  = 7.3, 3.0 Hz, 1H), 2.7 (dt,  $J$  = 9.8, 3.0 Hz, 1H), 1.6 (ddd,  $J$  = 14.5, 4.7, 3.0 Hz, 1H), 1.4 – 1.4 (m, 1H), 1.4 (t,  $J$  = 7.1 Hz, 3H) ppm.  $^{13}\text{C}$  NMR (100 MHz,  $\text{CDCl}_3$ )  $\delta$  166.5, 151.0, 140.7, 128.2, 127.7, 124.3, 122.0, 116.7, 107.6, 102.9, 97.9, 64.9, 64.7, 62.5, 31.7, 31.3, 30.8, 14.1 ppm. **HRMS**:  $[\text{M}+\text{H}]^+$  *calcd.* for  $\text{C}_{18}\text{H}_{21}\text{O}_6^+$  333.1333, found 333.1335.  $[\alpha]_D^{20}$  +23.96 ( $c$  = 0.37 in  $\text{CHCl}_3$ ). The enantiomeric excess was determined by HPLC analysis on Daicel Chiralpak IB column [*n*-hexane/*i*-PrOH = 80/20, 1 mL/min],  $\lambda$  = 205 nm,  $t_{major}$  = 6.56 min,  $t_{minor}$  = 7.71 min, **ee** = 99%. The diastereomeric ratio was determined by  $^1\text{H}$  NMR, **dr** >20:1.

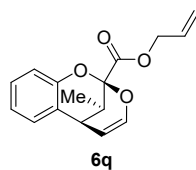

**6q** was obtained as a colorless oil 15 mg in 44% yield for two steps after column chromatography on silica gel (petroleum ether/ethyl acetate = 60/1).  $^1\text{H}$  NMR (400 MHz,  $\text{CDCl}_3$ )  $\delta$  7.2 (ddd,  $J$  = 8.8, 7.3, 1.7 Hz, 1H), 7.1 – 7.0 (m, 2H), 6.9 (td,  $J$  = 7.3, 1.3 Hz, 1H), 6.4 (d,  $J$  = 5.8 Hz, 1H), 6.0 (ddt,  $J$  = 17.2, 10.4, 5.8 Hz, 1H), 5.4 (dq,  $J$  = 17.2, 1.5 Hz, 1H), 5.4 – 5.3 (m, 2H), 4.8 – 4.7 (m, 2H), 3.2 (dd,  $J$  = 7.1, 2.9 Hz, 1H), 2.6 (qd,  $J$  = 6.9, 2.9 Hz, 1H), 0.9 (d,  $J$  = 6.9 Hz, 3H) ppm.  $^{13}\text{C}$  NMR (100 MHz,  $\text{CDCl}_3$ )  $\delta$  166.4, 150.8, 140.6, 131.2, 128.0, 127.7, 124.2, 121.9, 119.4, 116.6, 108.0, 98.4, 66.7, 33.5, 30.5, 13.1 ppm. **HRMS**:  $[\text{M}+\text{H}]^+$  *calcd.* for  $\text{C}_{16}\text{H}_{17}\text{O}_4^+$  273.1121, found 273.1120.  $[\alpha]_D^{20}$  -154.58 ( $c$  = 0.75 in  $\text{CHCl}_3$ ). The

enantiomeric excess was determined by HPLC analysis on Daicel Chiralpak IC column [*n*-hexane/*i*-PrOH = 95/5, 1 mL/min],  $\lambda$  = 205 nm,  $t_{\text{major}}$  = 8.23 min,  $t_{\text{minor}}$  = 12.45 min, **ee** = **99%**. The diastereomeric ratio was determined by  $^1\text{H}$  NMR, **dr** >**20:1**

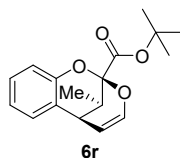

**6r** was obtained as a white solid 18 mg in 62% yield for two steps after column chromatography on silica gel (petroleum ether/ethyl acetate = 50/1).  $^1\text{H}$  NMR (400 MHz,  $\text{CDCl}_3$ )  $\delta$  7.1 (td,  $J$  = 7.7, 7.2, 1.7 Hz, 1H), 7.0 (ddd,  $J$  = 12.5, 7.8, 1.5 Hz, 2H), 6.9 (td,  $J$  = 7.3, 1.3 Hz, 1H), 6.4 (d,  $J$  = 5.8 Hz, 1H), 5.3 (dd,  $J$  = 7.1, 5.8 Hz, 1H), 3.1 (dd,  $J$  = 7.1, 2.9 Hz, 1H), 2.6 (qd,  $J$  = 6.9, 2.9 Hz, 1H), 1.6 (s, 9H), 0.9 (d,  $J$  = 7.0 Hz, 3H) ppm.  $^{13}\text{C}$  NMR (100 MHz,  $\text{CDCl}_3$ )  $\delta$  165.6, 151.1, 140.8, 127.9, 127.6, 124.4, 121.7, 116.6, 107.8, 98.1, 83.2, 33.7, 30.5, 27.9, 13.0 ppm. **HRMS**:  $[\text{M}+\text{H}]^+$  *calcd.* for  $\text{C}_{17}\text{H}_{21}\text{O}_4^+$  289.1434, found 289.1430.  $[\alpha]_{\text{D}}^{20}$  -171.73 ( $c$  = 0.50 in  $\text{CHCl}_3$ ). The enantiomeric excess was determined by HPLC analysis on Daicel Chiralpak OD-H column [*n*-hexane/*i*-PrOH = 90/10, 1 mL/min],  $\lambda$  = 205 nm,  $t_{\text{major}}$  = 8.82 min,  $t_{\text{minor}}$  = 4.49 min, **ee** = **97%**. The diastereomeric ratio was determined by  $^1\text{H}$  NMR, **dr** >**20:1**.

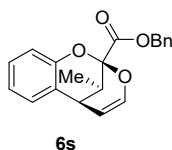

**6s** was obtained as a yellow oil 19 mg in 59% yield for two steps after column chromatography on silica gel (petroleum ether/ethyl acetate = 30/1).  $^1\text{H}$  NMR (400 MHz,  $\text{CDCl}_3$ )  $\delta$  7.5 – 7.3 (m, 5H), 7.1 (ddd,  $J$  = 8.7, 7.2, 1.7 Hz, 1H), 7.1 (ddd,  $J$  = 13.9, 7.8, 1.5 Hz, 2H), 6.9 (td,  $J$  = 7.3, 1.3 Hz, 1H), 6.4 (d,  $J$  = 5.8 Hz, 1H), 5.4 (d,  $J$  = 12.3 Hz, 1H), 5.3 – 5.3 (m, 2H), 3.1 (dd,  $J$  = 7.1, 2.9 Hz, 1H), 2.6 (qd,  $J$  = 7.0, 2.9 Hz, 1H), 0.8 (d,  $J$  = 6.9 Hz, 3H) ppm.  $^{13}\text{C}$  NMR (100 MHz,  $\text{CDCl}_3$ )  $\delta$  166.6, 150.9, 140.6, 135.1, 128.7, 128.6, 128.4, 128.0, 127.7, 124.2, 121.9, 116.6, 108.0, 98.4, 67.8, 33.5, 30.5, 13.0 ppm. **HRMS**:  $[\text{M}+\text{H}]^+$  *calcd.* for

$C_{20}H_{19}O_4^+$  323.1278, found 323.1276.  $[\alpha]_D^{20}$  -149.16 ( $c = 0.75$  in  $CHCl_3$ ). The enantiomeric excess was determined by HPLC analysis on Daicel Chiralpak OD-H column [ $n$ -hexane/ $i$ -PrOH = 90/10, 1 mL/min],  $\lambda = 205$  nm,  $t_{major} = 10.03$  min,  $t_{minor} = 8.74$  min, **ee** = **98%**. The diastereomeric ratio was determined by  $^1H$  NMR, **dr** >**20:1**.

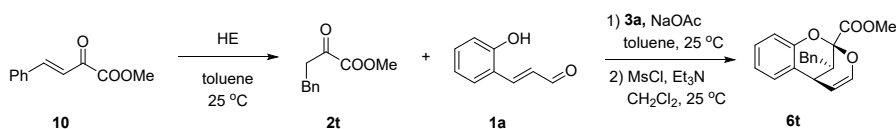

**Detailed method:** A glass vial equipped with a magnetic stirring bar was charged with methyl (*E*)-2-oxo-4-phenylbut-3-enoate **10** (0.13 mmol, 25 mg, 1.3 equiv.) in toluene (0.2 mL), then Hantzsch ester (HE) (0.14 mmol, 35 mg, 1.4 equiv.) was added and the resulting solution was stirred for about 12 h at 25 °C until the material **10** disappeared. After completion of the reaction, the crude product was directly put into the next step without column chromatography separation. Then the catalyst **3a** (0.02 mmol, 6.5 mg, 20 mol%), 2-hydroxycinnamaldehyde **1a** (0.1 mmol, 14.8 mg, 1.0 equiv.) and NaOAc (0.02 mmol, 1.6 mg, 20 mol%) was added in one portion and the resulting solution was stirred for about 3 h at 25 °C until the material **1a** disappeared. The reaction mixtures were diluted by 0.5 mL dichloromethane. Then TEA (0.3 mmol, 30.3 mg, 3.0 equiv.), MsCl (0.2 mmol, 22.9 mg, 2.0 equiv.), DMAP (0.02 mmol, 2.4 mg, 0.2 equiv.) were added to the reaction mixtures at 0 °C in the ice bath. After full conversion of the reaction about 8 h at 25 °C, the reaction mixture was purified by flash chromatography on silica gel (petroleum ether/ethyl acetate = 30/1) to give product **6t** as a yellow oil 15 mg in 47% yield for two steps.  **$^1H$  NMR** (400 MHz,  $CDCl_3$ )  $\delta$  7.3 – 7.3 (m, 1H), 7.3 (s, 1H), 7.2 (dt,  $J = 5.4, 1.2$  Hz, 1H), 7.2 – 7.2 (m, 2H), 7.1 (d,  $J = 8.1$  Hz, 1H), 7.0 – 7.0 (m, 4H), 6.4 (d,  $J = 5.7$  Hz, 1H), 5.2 (dd,  $J = 7.3, 5.7$  Hz, 1H), 3.9 (s, 3H), 3.0 (dd,  $J = 7.3, 2.6$  Hz, 1H), 2.8 – 2.7 (m, 2H), 2.2 (dd,  $J = 14.6, 12.3$  Hz, 1H) ppm.  **$^{13}C$  NMR** (100 MHz,  $CDCl_3$ )  $\delta$  167.1, 151.0, 140.7, 138.1, 129.1, 128.5, 128.2, 127.9, 126.6, 124.0, 122.2, 116.8, 107.8, 98.1, 53.3, 37.5, 32.9, 29.7 ppm. **HRMS:**  $[M+Na]^+$  *calcd.* for  $C_{20}H_{18}O_4Na^+$  345.1097, found 345.1100.  $[\alpha]_D^{20}$  -107.17 ( $c = 0.40$  in  $CHCl_3$ ). The enantiomeric excess was determined by HPLC analysis on Daicel Chiralpak IB column [ $n$ -

hexane/*i*-PrOH = 90/10, 1 mL/min],  $\lambda$  = 220 nm,  $t_{major}$  = 6.21 min,  $t_{minor}$  = 8.08 min, **ee** = **94%**. The diastereomeric ratio was determined by  $^1\text{H}$  NMR, ***dr*** = **7:1**.



## E. Other reactions

### E1. Synthesis of 8

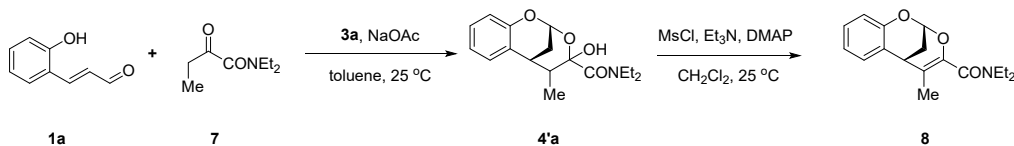

**Detailed method:** A glass vial equipped with a magnetic stirring bar was charged with catalyst **3a** (0.02 mmol, 6.5 mg, 20 mol%) in toluene (0.2 mL), then 2-hydroxycinnamaldehyde **1a** (0.1 mmol, 14.8 mg, 1.0 equiv.), NaOAc (0.02 mmol, 1.6 mg, 20 mol%) and the 2-oxocarboxylic amide **7** (0.12 mmol, 18.9 mg, 1.2 equiv.) was added. The reaction mixture was stirred at 25 °C for 8 h. until the material **1a** disappeared. After completion of the reaction, the crude product was purified by flash chromatography on silica gel (petroleum ether/ethyl acetate = 5/1) to afford **4'a**. Then the product **4'a** (0.1 mmol, 30.5 mg, 1.0 equiv.) was respectively dissolved in CH<sub>2</sub>Cl<sub>2</sub> (0.2 mmol in 1 mL) at 0 °C in the ice bath. TEA (0.3 mmol, 30.3 mg, 3.0 equiv.), MsCl (0.2 mmol, 22.8 mg, 2.0 equiv.), DMAP (0.02 mmol, 2.4 mg, 0.2 equiv.) were added to the reaction mixtures in order. After full conversion of the reaction, the reaction mixture was purified by flash chromatography on silica gel (petroleum ether/ethyl acetate = 10/1) to give product **8** as a yellow solid 13 mg in 43% yield. <sup>1</sup>H NMR (400 MHz, CDCl<sub>3</sub>) δ 7.2 – 7.0 (m, 2H), 7.0 – 6.8 (m, 2H), 6.0 (q, *J* = 2.0 Hz, 1H), 3.4 (dq, *J* = 14.2, 7.1 Hz, 1H), 3.3 (dq, *J* = 14.2, 7.2 Hz, 1H), 3.1 – 3.1 (m, 2H), 3.0 (dq, *J* = 14.3, 7.1 Hz, 1H), 2.3 (ddd, *J* = 12.9, 3.4, 2.0 Hz, 1H), 2.0 (dt, *J* = 13.0, 2.6 Hz, 1H), 1.7 (s, 3H), 1.1 (t, *J* = 7.1 Hz, 3H), 0.9 (t, *J* = 7.1 Hz, 3H) ppm. <sup>13</sup>C NMR (100 MHz, CDCl<sub>3</sub>) δ 164.6, 152.1, 140.1, 127.8, 126.9, 126.2, 120.8, 115.8, 112.0, 91.7, 42.6, 39.2, 31.6, 25.4, 16.0, 13.9, 12.8 ppm. HRMS: [M+H]<sup>+</sup> *calcd.* for C<sub>17</sub>H<sub>22</sub>NO<sub>3</sub><sup>+</sup> 288.1594, found 288.1594. [α]<sub>D</sub><sup>20</sup> +83.28 (*c* = 0.65 in CHCl<sub>3</sub>). The enantiomeric excess was determined by HPLC analysis on Daicel Chiralpak IA column [*n*-hexane/*i*-PrOH = 90/10, 1 mL/min], λ = 205 nm, *t*<sub>major</sub> = 7.17 min, *t*<sub>minor</sub> = 9.01 min, **ee** = 98%.

## E2. Synthesis of **12**

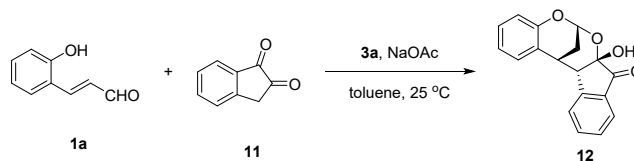

**Detailed method:** A glass vial equipped with a magnetic stirring bar was charged with catalyst **3a** (0.02 mmol, 6.5 mg, 20 mol%) in toluene (0.2 mL), then 2-hydroxycinnamaldehyde **1a** (0.1 mmol, 14.8 mg, 1.0 equiv.), NaOAc (0.02 mmol, 1.6 mg, 20 mol%) and the indan-1,2-dione **11** (0.12 mmol, 17.5mg, 1.2 equiv.) was added. The reaction mixture was stirred at 25 °C for 1 h until the material **1a** disappeared. After completion of the reaction, the crude product was purified by flash chromatography on silica gel (petroleum ether/ethyl acetate = 7/1) to afford **12** as a yellow solid 22 mg in 78% yield. **<sup>1</sup>H NMR** (400 MHz, CDCl<sub>3</sub>) δ 7.9 (d, *J* = 7.6 Hz, 1H), 7.8 – 7.7 (m, 1H), 7.7 – 7.7 (m, 1H), 7.5 (t, *J* = 7.5 Hz, 1H), 7.3 – 7.3 (m, 2H), 7.0 – 7.0 (m, 1H), 7.0 (d, *J* = 8.1 Hz, 1H), 5.6 (s, 1H), 3.7 (s, 1H), 3.7 – 3.6 (m, 1H), 3.6 (s, 1H), 1.8 (q, *J* = 2.6 Hz, 2H) ppm. **<sup>13</sup>C NMR** (100 MHz, CDCl<sub>3</sub>) δ 198.1, 152.2, 150.4, 136.2, 133.3, 129.0, 129.0, 128.1, 125.9, 124.9, 124.2, 121.4, 116.6, 94.9, 91.8, 49.7, 28.5, 22.5 ppm. **HRMS:** [M+NH<sub>4</sub>]<sup>+</sup> *calcd.* for C<sub>18</sub>H<sub>18</sub>O<sub>4</sub>N<sup>+</sup> 312.1230, found 312.1231. [**α**]<sub>D</sub><sup>20</sup> -90.27 (*c* = 0.65 in CHCl<sub>3</sub>). The enantiomeric excess was determined by HPLC analysis on Daicel Chiralpak OD-H column [*n*-hexane/*i*-PrOH = 80/20, 1 mL/min], λ = 205 nm, *t*<sub>major</sub> = 24.69 min, *t*<sub>minor</sub> = 18.95 min, **ee** = 95%.

## F. Synthetic transformation

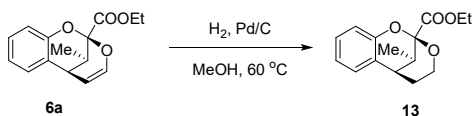

A solution of **6a** (18.2 mg, 0.07 mmol) and 20% Pd/C (3.6 mg) in absolute MeOH (1 mL) was placed under an atmosphere of hydrogen. After stirring for 18 h at 60 °C, the reaction mixture was filtered through a short pad of silica gel and concentrated in vacuo. The product was purified by column chromatography on a silica gel (petroleum ether/ethyl acetate = 20/1) to afford the desired product **13** as a colorless oil (19 mg, 99%).

**ethyl (2S,6R,11R)-11-methyl-5,6-dihydro-4H-2,6-methanobenzo[d][1,3]dioxocine-2-carboxylate (13) :**

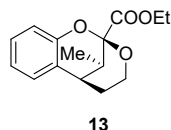

**<sup>1</sup>H NMR** (400 MHz, CDCl<sub>3</sub>)  $\delta$  7.2 (ddd,  $J$  = 8.2, 7.3, 1.8 Hz, 1H), 7.1 (ddd,  $J$  = 9.3, 7.8, 1.5 Hz, 2H), 7.0 (td,  $J$  = 7.4, 1.2 Hz, 1H), 4.4 – 4.3 (m, 2H), 3.9 (dd,  $J$  = 12.0, 5.5 Hz, 1H), 3.6 (td,  $J$  = 12.5, 3.2 Hz, 1H),

3.0 (q,  $J$  = 3.2 Hz, 1H), 2.5 (qd,  $J$  = 6.9, 2.4 Hz, 1H), 2.3 (ddd,  $J$  = 13.0, 5.8, 3.5 Hz, 1H), 1.7 (td,  $J$  = 3.4, 1.1 Hz, 1H), 1.4 (t,  $J$  = 7.1 Hz, 3H), 0.8 (d,  $J$  = 7.0 Hz, 3H) ppm. **<sup>13</sup>C NMR** (100 MHz, CDCl<sub>3</sub>)  $\delta$  166.9, 154.2, 129.1, 128.2, 122.5, 121.7, 115.3, 98.9, 62.2, 59.8, 36.2, 33.8, 33.1, 14.3, 14.2 ppm. **HRMS:**  $[M+H]^+$  *calcd.* for C<sub>15</sub>H<sub>19</sub>O<sub>4</sub><sup>+</sup> 263.1278, found 263.1280.  $[\alpha]_D^{20}$  -59.78 ( $c$  = 0.90 in CHCl<sub>3</sub>). The enantiomeric excess was determined by HPLC analysis on Daicel Chiralpak OD-H column [*n*-hexane/*i*-PrOH = 95/5, 1 mL/min],  $\lambda$  = 220 nm,  $t_{major}$  = 14.14 min,  $t_{minor}$  = 7.67 min, **ee** = **98%**. The diastereomeric ratio was determined by <sup>1</sup>H NMR, **dr** >**20:1**.

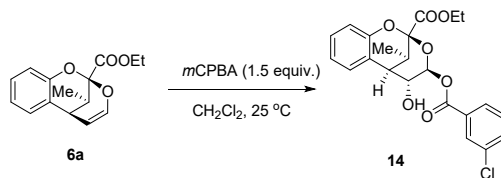

To a solution of **6a** (26 mg, 0.1 mmol) in CH<sub>2</sub>Cl<sub>2</sub> (0.5mL) was added a solution of 3-chloroperbenzoic acid (26 mg, 0.15 mmol) at 25 °C. The reaction mixture was stirred at room temperature for 0.5 h. After completion of the reaction, the product was purified by column chromatography on a silica gel (petroleum ether/ethyl acetate = 4/1) to afford the desired product **14** as a white solid (36 mg, 83%)

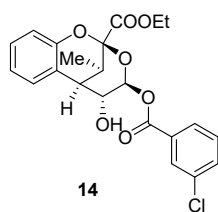

**ethyl (2R,4S,5S,6R,11R)-5-((3-chlorobenzoyl)oxy)-4-hydroxy-11-methyl-5,6-dihydro-4H-2,6-methanobenzo[d][1,3]dioxocine-2-carboxylate (14)** :  $^1\text{H NMR}$  (400 MHz,  $\text{CDCl}_3$ )  $\delta$  7.4 (ddd,  $J = 7.9, 2.1, 1.2$  Hz, 1H), 7.4 – 7.3 (m, 1H), 7.3 (dt,  $J = 7.8, 1.4$  Hz, 1H), 7.2 (dd,  $J = 7.7, 1.7$  Hz, 2H), 7.2 (t,  $J = 7.9$  Hz, 2H), 7.1 (ddt,  $J = 7.5, 3.8, 1.9$  Hz, 2H), 7.0 (t,  $J = 1.9$  Hz, 1H), 6.3 (d,  $J = 0.9$  Hz, 1H), 4.4 – 4.3 (m, 2H), 4.1 (d,  $J = 3.3$  Hz, 1H), 3.1 – 3.1 (m, 2H), 1.4 (t,  $J = 7.1$  Hz, 3H), 0.9 (d,  $J = 6.9$  Hz, 3H) ppm.  $^{13}\text{C NMR}$  (100 MHz,  $\text{CDCl}_3$ )  $\delta$  166.3, 163.4, 152.0, 134.2, 133.4, 130.6, 129.6, 129.5, 129.4, 129.3, 128.1, 122.2, 119.8, 116.6, 98.2, 93.6, 71.7, 62.7, 40.4, 25.7, 14.1, 13.5 ppm. **HRMS**:  $[\text{M}+\text{H}]^+$  *calcd.* for  $\text{C}_{22}\text{H}_{22}\text{ClO}_7$  + 433.1049, found 433.1048.  $[\alpha]_{\text{D}}^{20}$  -78.29 ( $c = 1.75$  in  $\text{CHCl}_3$ ). The enantiomeric excess was determined by HPLC analysis on Daicel Chiralpak AD-H column [*n*-hexane/*i*-PrOH = 90/10, 1 mL/min],  $\lambda = 210$  nm,  $t_{\text{major}} = 11.31$  min,  $t_{\text{minor}} = 13.00$  min, **ee** >99%. The diastereomeric ratio was determined by  $^1\text{H NMR}$ , **dr** >20:1.

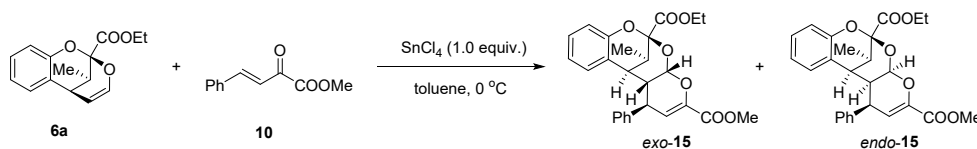

**6a** (26 mg, 0.1 mmol) and methyl (*E*)-2-oxo-4-phenylbut-3-enoate **10** (28.6 mg, 0.15 mmol) was dissolved in 1.0 mL toluene under argon atmosphere, and the resulting mixture was cooled to 0 °C.  $\text{SnCl}_4$  (26 mg, 0.1 mmol) was then added and the reaction mixture was stirred vigorously at 0 °C. When substrate **6a** was disappeared on TLC, the crude product was purified by flash column chromatography on silica gel (petroleum ether/ethyl acetate = 6/1 to 4/1) to afford pure product *exo*-**15** (10 mg, 22% yield) as a white solid and *endo*-**15** (15 mg, 33% yield) as a white solid.

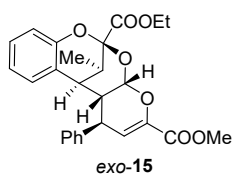

**exo-6-ethyl 3-methyl (1R,6R,12R,13R)-13-methyl-1-phenyl-4a,12a-dihydro-1H,12H-6,12-methanobenzo[d]pyrano[3,2-g][1,3]dioxocine-3,6-dicarboxylate (*exo*-15)** :  $^1\text{H NMR}$  (400 MHz,  $\text{CDCl}_3$ )  $\delta$  7.5 – 7.4 (m, 2H), 7.4 – 7.4 (m, 1H), 7.4 – 7.3 (m, 2H), 7.1 (ddd,  $J = 8.8, 7.4, 1.7$  Hz, 1H), 7.0 (dd,  $J = 8.2, 1.2$  Hz, 1H), 6.7 (td,  $J = 7.4, 1.2$  Hz, 1H), 6.4 (d,

$J = 2.6$  Hz, 1H), 5.8 (dd,  $J = 7.6, 1.6$  Hz, 1H), 5.7 (d,  $J = 4.9$  Hz, 1H), 4.4 – 4.3 (m, 2H), 4.2 (dd,  $J = 6.8, 3.1$  Hz, 1H), 3.9 (s, 3H), 2.6 (t,  $J = 2.7$  Hz, 1H), 2.6 (td,  $J = 6.7, 2.9$  Hz, 1H), 2.5 – 2.4 (m, 1H), 1.4 (t,  $J = 7.1$  Hz, 4H), 0.6 (d,  $J = 6.7$  Hz, 3H) ppm.  $^{13}\text{C}$  NMR (100 MHz,  $\text{CDCl}_3$ )  $\delta$  166.2, 162.4, 150.2, 143.9, 139.0, 129.0, 129.0, 128.1, 127.7, 125.6, 122.1, 116.8, 110.5, 98.6, 92.7, 62.2, 52.5, 44.6, 39.7, 33.8, 27.2, 14.1, 13.6 ppm. HRMS:  $[\text{M}+\text{NH}_4]^+$  calcd. for  $\text{C}_{26}\text{H}_{30}\text{NO}_7^+$  468.2017, found 468.2014.  $[\alpha]_{\text{D}}^{20}$  -33.73 ( $c = 0.50$  in  $\text{CHCl}_3$ ). The enantiomeric excess was determined by HPLC analysis on Daicel Chiralpak AD-H column [ $n$ -hexane/ $i$ -PrOH = 90/10, 1 mL/min],  $\lambda = 205$  nm,  $t_{\text{major}} = 33.95$  min,  $t_{\text{minor}} = 23.15$  min, **ee** = 99%. The diastereomeric ratio was determined by  $^1\text{H}$  NMR, **dr** >20:1.

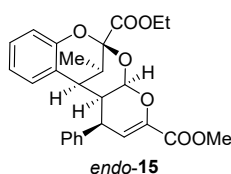

**endo-6-ethyl 3-methyl (1R,6R,12R,13R)-13-methyl-1-phenyl-4a,12a-dihydro-1H,12H-6,12-methanobenzo[d]pyrano[3,2-g][1,3]dioxocine-3,6-dicarboxylate (endo-15):**  $^1\text{H}$  NMR (400

MHz,  $\text{CDCl}_3$ )  $\delta$  7.4 (dd,  $J = 8.1, 6.4$  Hz, 2H), 7.4 – 7.4 (m, 1H), 7.2 (d,  $J = 1.3$  Hz, 2H), 7.2 (ddd,  $J = 8.3, 7.3, 1.7$  Hz, 1H), 7.0 (dd,  $J = 8.3, 1.3$  Hz, 1H), 6.9 (td,  $J = 7.4, 1.2$  Hz, 1H), 6.8 (dd,  $J = 7.5, 1.7$  Hz, 1H), 6.2 (d,  $J = 2.5$  Hz, 1H), 5.5 (d,  $J = 3.1$  Hz, 1H), 4.5 – 4.3 (m, 2H), 3.9 (dd,  $J = 11.3, 2.6$  Hz, 1H), 3.8 (s, 3H), 3.1 (qd,  $J = 6.9, 2.5$  Hz, 1H), 2.8 (t,  $J = 2.9$  Hz, 1H), 2.1 (dt,  $J = 11.4, 3.1$  Hz, 1H), 1.4 (t,  $J = 7.1$  Hz, 3H), 0.8 (d,  $J = 6.8$  Hz, 3H) ppm.  $^{13}\text{C}$  NMR (100 MHz,  $\text{CDCl}_3$ )  $\delta$  165.5, 162.5, 153.7, 141.5, 140.6, 129.2, 128.9, 128.8, 128.2, 127.7, 122.3, 122.2, 115.4, 114.3, 100.7, 92.6, 62.5, 52.3, 44.3, 38.1, 36.2, 28.1, 14.2, 12.9 ppm. HRMS:  $[\text{M}+\text{NH}_4]^+$  calcd. for  $\text{C}_{26}\text{H}_{30}\text{NO}_7^+$  468.2017, found 468.2014.  $[\alpha]_{\text{D}}^{20}$  -57.78 ( $c = 0.30$  in  $\text{CHCl}_3$ ). The enantiomeric excess was determined by HPLC analysis on Daicel Chiralpak AD-H column [ $n$ -hexane/ $i$ -PrOH = 90/10, 1 mL/min],  $\lambda = 205$  nm,  $t_{\text{major}} = 25.90$  min,  $t_{\text{minor}} = 6.59$  min, **ee** = 99%. The diastereomeric ratio was determined by  $^1\text{H}$  NMR, **dr** >20:1.

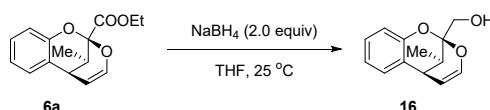

**6a** (27.8 mg, 0.11 mmol) was dissolved in THF (0.2 mL), and sodium borohydride (8.3 mg, 0.22 mmol) was added portionwise to maintain a gentle evolution of gas. Then, the mixture was stirred for 6 h at room temperature. The reaction mixture was quenched

with saturated aqueous  $\text{NH}_4\text{Cl}$  and diluted with water. The aqueous portion was extracted with ethyl acetate. The organic parts were combined, dried over  $\text{MgSO}_4$ , filtered and concentrated under vacuum. The residue was purified by column chromatograph on a silica gel (petroleum ether/ethyl acetate = 10/1) to get compound alcohol **16** (24 mg, 99%) as a white solid.

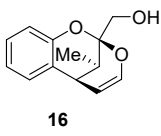 **16** **((2S,6R,11R)-11-methyl-6H-2,6-methanobenzo[d][1,3]dioxocin-2-yl)methanol (16)** :  $^1\text{H NMR}$  (400 MHz,  $\text{CDCl}_3$ )  $\delta$  7.2 – 7.1 (m, 1H), 7.0 (dd,  $J$  = 7.6, 1.7 Hz, 1H), 6.9 – 6.9 (m, 2H), 6.4 (d,  $J$  = 5.8 Hz, 1H), 5.2 (dd,  $J$  = 6.9, 5.8 Hz, 1H), 3.9 – 3.8 (m, 2H), 3.1 (dd,  $J$  = 6.9, 3.0 Hz, 1H), 2.4 (qd,  $J$  = 7.0, 3.0 Hz, 1H), 2.0 (s, 1H), 0.9 (d,  $J$  = 7.0 Hz, 3H) ppm.  $^{13}\text{C NMR}$  (100 MHz,  $\text{CDCl}_3$ )  $\delta$  151.4, 140.9, 128.1, 127.5, 125.1, 121.4, 115.8, 108.2, 100.7, 65.0, 34.3, 29.2, 13.2 ppm. **HRMS**:  $[\text{M}+\text{H}]^+$  calcd. for  $\text{C}_{13}\text{H}_{15}\text{O}_3^+$  219.1016, found 219.1015.  $[\alpha]_D^{20}$  -156.22 ( $c$  = 1.20 in  $\text{CHCl}_3$ ). The enantiomeric excess was determined by HPLC analysis on Daicel Chiralpak AD-H column [ $n$ -hexane/ $i$ -PrOH = 90/10, 1 mL/min],  $\lambda$  = 205 nm,  $t_{\text{major}}$  = 7.61 min,  $t_{\text{minor}}$  = 9.97 min, **ee** >99%. The diastereomeric ratio was determined by  $^1\text{H NMR}$ , **dr** >20:1.

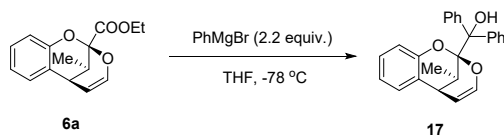

To a solution of **6a** (26 mg, 0.1 mmol) in anhydrous THF (1 mL) at  $-78^\circ\text{C}$  was added dropwise the Grignard reagents (75  $\mu\text{L}$ , 2.9 M). After stirring for 1 h at  $-78^\circ\text{C}$ , the mixture was quenched with a saturated solution of  $\text{NH}_4\text{Cl}$  (1 mL), and extracted with ethyl acetate. The combined organic layers were dried over  $\text{MgSO}_4$ , filtered, and concentrated in a rotary evaporator under vacuum. The residue was purified by silica gel column chromatography (petroleum ether/ethyl acetate = 50/1) to get compound alcohol **17** (40 mg, 99%) as a white solid.

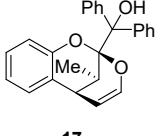 **17** **((2S,6R,11R)-11-methyl-6H-2,6-methanobenzo[d][1,3]dioxocin-2-yl)diphenylmethanol (17)** :  $^1\text{H NMR}$  (400 MHz,  $\text{CDCl}_3$ )  $\delta$  7.8 – 7.8 (m, 2H), 7.7 (dd,  $J$  = 8.5, 1.5 Hz, 2H), 7.4 (dd,  $J$  = 8.3, 6.3 Hz, 2H), 7.3 – 7.3 (m, 2H), 7.3 (d,  $J$  = 1.7 Hz, 1H), 7.2 (ddd,  $J$  = 8.2, 7.3, 1.7 Hz, 1H), 7.1 (ddd,  $J$  = 9.3, 7.7, 1.4 Hz, 2H), 6.9

(td,  $J = 7.4, 1.2$  Hz, 1H), 6.4 (d,  $J = 5.7$  Hz, 1H), 5.3 (dd,  $J = 7.0, 5.7$  Hz, 1H), 3.3 (s, 1H), 2.9 (dd,  $J = 7.0, 2.9$  Hz, 1H), 2.1 (d,  $J = 7.7$  Hz, 1H), 0.9 (d,  $J = 7.0$  Hz, 3H) ppm.  $^{13}\text{C}$  NMR (100 MHz,  $\text{CDCl}_3$ )  $\delta$  151.7, 144.8, 140.5, 129.1, 128.2, 127.7, 127.6, 127.5, 127.4, 127.2, 126.9, 125.3, 121.7, 115.9, 108.5, 104.2, 81.9, 36.0, 31.0, 15.0 ppm. **HRMS**:  $[\text{M}+\text{H}]^+$  *calcd.* for  $\text{C}_{25}\text{H}_{23}\text{O}_3^+$  371.1642, found 371.1640.  $[\alpha]_{\text{D}}^{20}$  -107.00 ( $c = 2.00$  in  $\text{CHCl}_3$ ). The enantiomeric excess was determined by HPLC analysis on Daicel Chiralpak AD-H column [ $n$ -hexane/ $i$ -PrOH = 90/10, 1 mL/min],  $\lambda = 220$  nm,  $t_{\text{major}} = 7.52$  min,  $t_{\text{minor}} = 5.97$  min, **ee** >99%. The diastereomeric ratio was determined by  $^1\text{H}$  NMR, **dr** >20:1.

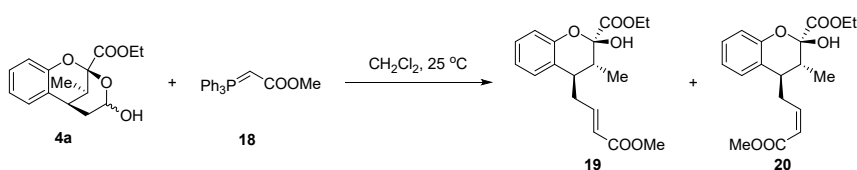

**4a** (27.8 mg, 0.1 mmol) and a stabilized ylide **18** (50.1 mg, 0.15 mmol) were dissolved in  $\text{CH}_2\text{Cl}_2$  (0.5 mL), and the solution was stirring at room temperature for overnight. The crude product was purified by column chromatography on a silica gel (petroleum ether/ethyl acetate =15/1) to get product **19** as white solid (25 mg, 75%) and product **20** as white solid (7 mg, 21%).

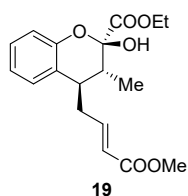

**ethyl (2S,3R,4R)-2-hydroxy-4-((E)-4-methoxy-4-oxobut-2-en-1-yl)-3-methylchromane-2-carboxylate (19)** :  $^1\text{H}$  NMR (400 MHz,  $\text{CDCl}_3$ )  $\delta$

7.2 (d,  $J = 7.9$  Hz, 1H), 7.1 (t,  $J = 7.6$  Hz, 1H), 7.0 (t,  $J = 7.5$  Hz, 1H), 6.8 (d,  $J = 8.1$  Hz, 1H), 6.8 – 6.7 (m, 1H), 5.9 (d,  $J = 15.3$  Hz, 1H), 4.5 (s, 1H), 4.4 –

4.3 (m, 2H), 3.7 (s, 3H), 3.1 – 3.0 (m, 2H), 2.8 – 2.7 (m, 1H), 2.2 (dq,  $J = 13.0, 6.6$  Hz, 1H), 1.4 (t,  $J = 7.1$  Hz, 3H), 1.0 (d,  $J = 6.5$  Hz, 3H) ppm.  $^{13}\text{C}$  NMR (100 MHz,  $\text{CDCl}_3$ )  $\delta$  170.1, 166.6, 151.6, 145.2, 127.8, 126.7, 123.7, 123.6, 121.8, 117.6, 96.8, 63.2, 51.5, 35.4, 34.5, 32.1, 14.1, 13.6 ppm. **HRMS**:  $[\text{M}+\text{NH}_4]^+$  *calcd.* for  $\text{C}_{18}\text{H}_{26}\text{O}_6\text{N}^+$  352.1755, found 352.1754.  $[\alpha]_{\text{D}}^{20}$  +16.94 ( $c = 1.20$  in  $\text{CHCl}_3$ ). The enantiomeric excess was determined by HPLC analysis on Daicel Chiralpak OD-H column [ $n$ -hexane/ $i$ -PrOH = 90/10, 1 mL/min],  $\lambda = 205$  nm,  $t_{\text{major}} = 7.59$  min,  $t_{\text{minor}} = 6.29$  min, **ee** >99%. The diastereomeric ratio was determined by  $^1\text{H}$  NMR, **dr** >20:1.

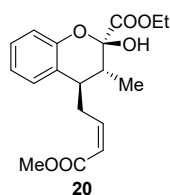

**ethyl (2*S*,3*R*,4*R*)-2-hydroxy-4-((*Z*)-4-methoxy-4-oxobut-2-en-1-yl)-3-methylchromane-2-carboxylate (20) :**  $^1\text{H}$  NMR (400 MHz,  $\text{CDCl}_3$ )  $\delta$

7.4 (dd,  $J = 8.1, 6.4$  Hz, 2H), 7.2 (d,  $J = 7.9$  Hz, 1H), 7.1 (t,  $J = 7.5$  Hz, 1H), 7.0 (td,  $J = 7.6, 1.2$  Hz, 1H), 6.8 (dd,  $J = 8.1, 1.0$  Hz, 1H), 6.0 (ddd,  $J = 11.7, 8.5,$

5.3 Hz, 1H), 5.8 (dt,  $J = 11.6, 1.8$  Hz, 1H), 4.4 – 4.3 (m, 2H), 3.7 (s, 3H), 3.6 (dd,  $J = 15.3, 8.5$  Hz, 1H), 3.3 – 3.2 (m, 1H), 3.1 (d,  $J = 11.8$  Hz, 1H), 2.2 (dt,  $J = 12.6, 6.4$  Hz, 1H), 1.4 (t,  $J = 7.1$  Hz, 3H), 1.0 (d,  $J = 6.6$  Hz, 3H) ppm.  $^{13}\text{C}$  NMR (100 MHz,  $\text{CDCl}_3$ )  $\delta$  170.2, 166.9, 151.9, 146.6, 127.7, 127.1, 124.0, 121.8, 121.4, 117.5, 96.9, 63.2, 51.2, 35.6, 34.8, 28.3, 14.1, 13.7 ppm.

**HRMS:**  $[\text{M}+\text{H}]^+$  *calcd.* for  $\text{C}_{18}\text{H}_{23}\text{O}_6^+$  335.1489, found 335.1487.  $[\alpha]_{\text{D}}^{20} +32.67$  ( $c = 0.30$  in  $\text{CHCl}_3$ ). The enantiomeric excess was determined by HPLC analysis on Daicel Chiralpak AD-H column [ $n$ -hexane/ $i$ -PrOH = 95/5, 1 mL/min],  $\lambda = 205$  nm,  $t_{\text{major}} = 17.76$  min,  $t_{\text{minor}} = 14.59$  min, **ee** >99%. The diastereomeric ratio was determined by  $^1\text{H}$  NMR, **dr** >20:1.

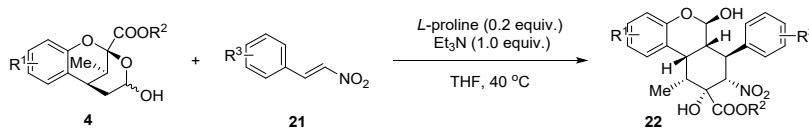

*L*-proline (0.02 mmol, 2.3 mg.) was added to a mixture of  $\text{Et}_3\text{N}$  (0.1 mmol, 10.1 mg), **4** (0.1 mmol, 27.8 mg), and nitroolefin **21** (0.12 mmol, 17.8 mg) in THF (0.2 mL) and stirred at room temperature. After completion of the reaction (as monitored by TLC), the crude product was purified by flash chromatography on silica gel (petroleum ether/ethyl acetate = 5/1) to afford **22**.

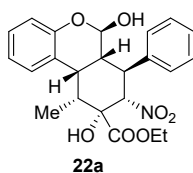

**22a** was obtained as a white solid 15 mg in 35% yield for two steps after column chromatography on silica gel (petroleum ether/ethyl acetate = 5/1)  $^1\text{H}$  NMR (400 MHz,  $\text{CDCl}_3$ )  $\delta$  7.6 (d,  $J = 7.9$  Hz, 1H), 7.3 (s, 4H), 7.3 (dd,  $J = 5.5, 2.7$  Hz, 1H), 7.2 (t,  $J = 7.6$  Hz, 1H), 6.9 – 6.9 (m, 2H), 5.3 (d,  $J = 12.1$  Hz, 1H), 4.9 (d,  $J = 1.9$  Hz, 1H), 4.4 (q,  $J = 7.1$  Hz, 2H), 3.6 (d,  $J = 5.8$  Hz, 1H), 3.6 (d,  $J = 12.3$  Hz, 1H), 3.4 (s, 1H), 2.7 (dd,  $J = 7.3, 4.5$  Hz, 1H), 2.3 (ddd,



$J = 12.3, 4.8, 2.0$  Hz, 1H), 1.6 (d,  $J = 7.3$  Hz, 3H), 1.4 (t,  $J = 7.1$  Hz, 3H) ppm.  $^{13}\text{C}$  NMR (100 MHz,  $\text{CDCl}_3$ )  $\delta$  172.7, 150.3, 137.4, 129.3, 129.0, 127.9, 127.7, 123.0, 120.9, 117.9, 93.6, 90.9, 79.0, 63.6, 44.2, 41.3, 39.9, 33.1, 16.6, 14.2 ppm. **HRMS**:  $[\text{M}+\text{H}]^+$  *calcd.* for  $\text{C}_{23}\text{H}_{29}\text{N}_2\text{O}_7^+$  445.1969, found 445.1964.  $[\alpha]_{\text{D}}^{20} +72.17$  ( $c = 0.40$  in  $\text{CHCl}_3$ ). The enantiomeric excess was determined by HPLC analysis on Daicel Chiralpak AD-H column [ $n$ -hexane/ $i$ -PrOH = 90/10, 1 mL/min],  $\lambda = 205$  nm,  $t_{\text{major}} = 37.59$  min,  $t_{\text{minor}} = 50.40$  min, **ee** = **98%**. The diastereomeric ratio was determined by  $^1\text{H}$  NMR, **dr** >**20:1**.

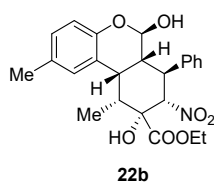

**22b** was obtained as a white solid 17 mg in 37% yield for two steps after column chromatography on silica gel (petroleum ether/ethyl acetate = 5/1).  $^1\text{H}$  NMR (400 MHz,  $\text{CDCl}_3$ )  $\delta$  7.4 (s, 1H), 7.3 (d,  $J = 2.6$  Hz, 4H), 7.3 (d,  $J = 8.4$  Hz, 1H), 7.0 (dd,  $J = 8.1, 2.2$  Hz, 1H), 6.8 (d,  $J = 8.2$  Hz, 1H), 5.3 (d,  $J = 12.1$  Hz, 1H), 4.8 (d,  $J = 2.3$  Hz, 1H), 4.4 (q,  $J = 7.1$  Hz, 2H), 3.6 – 3.6 (m, 2H), 3.4 (s, 1H), 2.8 (d,  $J = 3.1$  Hz, 1H), 2.7 (qd,  $J = 7.2, 4.4$  Hz, 1H), 2.3 (dd,  $J = 4.8, 2.1$  Hz, 1H), 2.3 (s, 3H), 1.6 (d,  $J = 7.4$  Hz, 3H), 1.4 (t,  $J = 7.1$  Hz, 3H) ppm.  $^{13}\text{C}$  NMR (100 MHz,  $\text{CDCl}_3$ )  $\delta$  172.7, 148.0, 137.4, 130.0, 129.6, 129.0, 128.4, 127.9, 122.5, 117.7, 93.6, 90.8, 63.6, 44.2, 41.4, 39.9, 33.1, 21.2, 16.7, 14.2 ppm. **HRMS**:  $[\text{M}+\text{H}]^+$  *calcd.* for  $\text{C}_{24}\text{H}_{27}\text{NO}_7^+$  442.1861, found 442.1860.  $[\alpha]_{\text{D}}^{20} +16.94$  ( $c = 1.15$  in  $\text{CHCl}_3$ ). The enantiomeric excess was determined by HPLC analysis on Daicel Chiralpak AD-H column [ $n$ -hexane/ $i$ -PrOH = 90/10, 1 mL/min],  $\lambda = 205$  nm,  $t_{\text{major}} = 32.95$  min,  $t_{\text{minor}} = 43.15$  min, **ee** = **99%**. The diastereomeric ratio was determined by  $^1\text{H}$  NMR, **dr** >**20:1**.

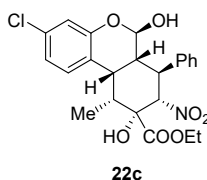

**22c** was obtained as a white solid 15 mg in 32% yield for two steps after column chromatography on silica gel (petroleum ether/ethyl acetate = 5/1).  $^1\text{H}$  NMR (400 MHz,  $\text{CDCl}_3$ )  $\delta$  7.6 (dd,  $J = 8.5, 1.1$  Hz, 1H), 7.4 – 7.3 (m, 5H), 6.9 (d,  $J = 2.3$  Hz, 1H), 6.9 (dd,  $J = 8.5, 2.4$  Hz, 1H), 5.2 (d,  $J = 12.1$  Hz, 1H), 4.8 (s, 1H), 4.4 (q,  $J = 7.1$  Hz, 2H), 3.6 – 3.5 (m, 2H),

3.4 (d,  $J = 0.9$  Hz, 1H), 3.0 (s, 1H), 2.7 (qd,  $J = 7.3, 3.8$  Hz, 1H), 2.3 (ddd,  $J = 12.4, 4.8, 2.1$  Hz, 1H), 1.6 (d,  $J = 7.3$  Hz, 3H), 1.4 (t,  $J = 7.1$  Hz, 3H) ppm.  $^{13}\text{C}$  NMR (100 MHz,  $\text{CDCl}_3$ )  $\delta$  172.6, 151.1, 137.1, 132.6, 130.4, 129.1, 128.0, 121.6, 121.1, 118.0, 93.4, 91.0, 78.9, 63.7, 43.9, 41.1, 39.8, 32.8, 16.5, 14.1 ppm. HRMS:  $[\text{M}+\text{H}]^+$  *calcd.* for  $\text{C}_{23}\text{H}_{25}^{35}\text{ClNO}_7^+$  462.1315, found 462.1318; *calcd.* for  $\text{C}_{23}\text{H}_{25}^{37}\text{ClNO}_7^+$  464.1285, found 464.1286.  $[\alpha]_{\text{D}}^{20} +34.79$  ( $c = 0.80$  in  $\text{CHCl}_3$ ). The enantiomeric excess was determined by HPLC analysis on Daicel Chiralpak ID column [ $n$ -hexane/ $i$ -PrOH = 80/20, 1 mL/min],  $\lambda = 205$  nm,  $t_{\text{major}} = 18.78$  min,  $t_{\text{minor}} = 22.76$  min, **ee** = **98%**. The diastereomeric ratio was determined by  $^1\text{H}$  NMR, **dr** > **20:1**.

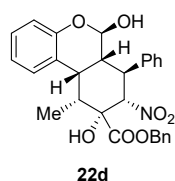

**22d** was obtained as a white solid 25 mg in 51% yield for two steps after column chromatography on silica gel (petroleum ether/ethyl acetate = 5/1).  $^1\text{H}$  NMR (400 MHz,  $\text{CDCl}_3$ )  $\delta$  7.6 (dd,  $J = 8.4, 1.6$  Hz, 1H), 7.4 (dtd,  $J = 5.6, 3.6, 3.1, 2.0$  Hz, 5H), 7.3 – 7.3 (m, 4H), 7.2 (ddt,  $J = 8.6, 7.7, 1.3$  Hz, 1H), 6.9 (t,  $J = 7.5$  Hz, 2H), 5.4 (d,  $J = 11.9$  Hz, 1H), 5.3 (dd,  $J = 12.0, 1.6$  Hz, 2H), 4.8 (t,  $J = 2.5$  Hz, 1H), 3.6 – 3.6 (m, 2H), 3.4 (d,  $J = 0.9$  Hz, 1H), 2.8 (d,  $J = 4.0$  Hz, 1H), 2.7 (td,  $J = 7.4, 4.6$  Hz, 1H), 2.3 (ddd,  $J = 12.4, 4.8, 2.1$  Hz, 1H), 1.5 (d,  $J = 7.3$  Hz, 3H) ppm.  $^{13}\text{C}$  NMR (100 MHz,  $\text{CDCl}_3$ )  $\delta$  172.7, 150.3, 137.4, 129.3, 129.1, 129.1, 129.0, 128.9, 127.9, 127.7, 127.0, 122.9, 120.9, 117.9, 93.5, 90.8, 79.2, 69.3, 44.1, 41.3, 39.9, 33.1, 16.5 ppm. HRMS:  $[\text{M}+\text{H}]^+$  *calcd.* for  $\text{C}_{28}\text{H}_{28}\text{NO}_7^+$  490.1861, found 490.1860.  $[\alpha]_{\text{D}}^{20} +17.87$  ( $c = 0.96$  in  $\text{CHCl}_3$ ). The enantiomeric excess was determined by HPLC analysis on Daicel Chiralpak OD-H column [ $n$ -hexane/ $i$ -PrOH = 90/10, 1 mL/min],  $\lambda = 205$  nm,  $t_{\text{major}} = 30.93$  min,  $t_{\text{minor}} = 26.17$  min, **ee** = **95%**. The diastereomeric ratio was determined by  $^1\text{H}$  NMR, **dr** > **20:1**.

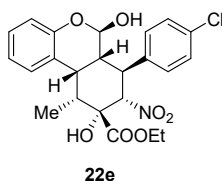

**22e** was obtained as a white solid 20 mg in 44% yield for two steps after column chromatography on silica gel (petroleum ether/ethyl acetate = 5/1).  $^1\text{H}$  NMR (400 MHz,

CDCl<sub>3</sub>)  $\delta$  7.6 (d,  $J$  = 8.0 Hz, 1H), 7.4 – 7.3 (m, 4H), 7.2 (t,  $J$  = 7.7 Hz, 1H), 6.9 – 6.9 (m, 2H), 5.2 (d,  $J$  = 12.0 Hz, 1H), 4.9 (dd,  $J$  = 3.3, 2.0 Hz, 1H), 4.4 (q,  $J$  = 7.1 Hz, 2H), 3.7 – 3.5 (m, 2H), 3.4 (d,  $J$  = 0.8 Hz, 1H), 2.8 (d,  $J$  = 3.3 Hz, 1H), 2.7 – 2.6 (m, 1H), 2.3 (ddd,  $J$  = 12.3, 4.8, 2.1 Hz, 1H), 1.6 (d,  $J$  = 7.3 Hz, 3H), 1.4 (t,  $J$  = 7.1 Hz, 3H) ppm. **<sup>13</sup>C NMR** (100 MHz, CDCl<sub>3</sub>)  $\delta$  13C NMR (100 MHz, CDCl<sub>3</sub>)  $\delta$  172.7, 150.2, 136.1, 133.8, 129.4, 129.3, 127.8, 122.9, 121.1, 118.0, 93.4, 90.8, 79.0, 63.8, 44.1, 41.4, 39.5, 33.1, 16.6, 14.2 ppm. **HRMS**: [M+H]<sup>+</sup> *calcd.* for C<sub>23</sub>H<sub>25</sub><sup>35</sup>ClNO<sub>7</sub><sup>+</sup> 462.1315, found 462.1318; *calcd.* for C<sub>23</sub>H<sub>25</sub><sup>37</sup>ClNO<sub>7</sub><sup>+</sup> 464.1285, found 464.1286. [ $\alpha$ ]<sub>D</sub><sup>20</sup> +15.84 ( $c$  = 0.80 in CHCl<sub>3</sub>). The enantiomeric excess was determined by HPLC analysis on Daicel Chiralpak AD-H column [*n*-hexane/*i*-PrOH = 70/30, 1 mL/min],  $\lambda$  = 205 nm,  $t_{major}$  = 11.02 min,  $t_{minor}$  = 8.89 min, **ee** = **99%**. The diastereomeric ratio was determined by <sup>1</sup>H NMR, **dr** >**20:1**.

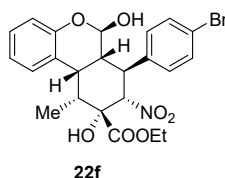

**22f** was obtained as a white solid 20 mg in 39% yield for two steps after column chromatography on silica gel (petroleum ether/ethyl acetate = 5/1). **<sup>1</sup>H NMR** (400 MHz, CDCl<sub>3</sub>)  $\delta$  7.6 (dt,  $J$  = 7.9, 1.5 Hz, 1H), 7.5 (d,  $J$  = 8.7 Hz, 2H), 7.2 (d,  $J$  = 8.7 Hz, 3H), 7.2 (ddt,  $J$  = 8.2, 7.1, 1.2 Hz, 1H), 6.9 (ddd,  $J$  = 15.0, 7.8, 1.4 Hz, 2H), 5.2 (d,  $J$  = 12.1 Hz, 1H), 4.8 (s, 1H), 4.4 (q,  $J$  = 7.1 Hz, 2H), 3.6 (t,  $J$  = 4.6 Hz, 1H), 3.6 (t,  $J$  = 12.2 Hz, 1H), 3.4 (d,  $J$  = 0.8 Hz, 1H), 2.9 (s, 1H), 2.7 – 2.6 (m, 1H), 2.3 (ddd,  $J$  = 12.3, 4.8, 2.1 Hz, 1H), 1.6 (d,  $J$  = 7.3 Hz, 3H), 1.4 (t,  $J$  = 7.1 Hz, 3H) ppm. **<sup>13</sup>C NMR** (100 MHz, CDCl<sub>3</sub>)  $\delta$  172.5, 150.2, 136.6, 132.2, 129.3, 127.7, 122.8, 121.9, 121.0, 117.9, 93.3, 90.7, 79.0, 63.7, 44.1, 41.3, 39.5, 33.0, 16.5, 14.1 ppm. **HRMS**: [M+H]<sup>+</sup> *calcd.* for C<sub>23</sub>H<sub>25</sub><sup>79</sup>BrNO<sub>7</sub><sup>+</sup> 506.0809, found 506.0811; *calcd.* for C<sub>23</sub>H<sub>25</sub><sup>81</sup>BrNO<sub>7</sub><sup>+</sup> 508.0789, found 508.0790. [ $\alpha$ ]<sub>D</sub><sup>20</sup> +62.22 ( $c$  = 1.10 in CHCl<sub>3</sub>). The enantiomeric excess was determined by HPLC analysis on Daicel Chiralpak IC column [*n*-hexane/*i*-PrOH = 90/10, 1 mL/min],  $\lambda$  = 205 nm,  $t_{major}$  = 29.65 min,  $t_{minor}$  = 12.23 min, **ee** = **98%**. The diastereomeric ratio was determined by <sup>1</sup>H NMR, **dr** >**20:1**.

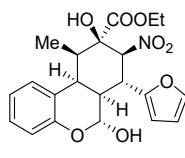

**22g**

**22g** was obtained as a white solid 20 mg in 48% yield for two steps after column chromatography on silica gel (petroleum ether/ethyl acetate = 5/1). **<sup>1</sup>H NMR** (400 MHz, CDCl<sub>3</sub>) δ 7.6 (dt, *J* = 8.0, 1.4 Hz, 1H), 7.4 – 7.4 (m, 1H), 7.2 (t, *J* = 7.6 Hz, 1H), 6.9 – 6.9 (m, 2H), 6.3 (qd, *J* = 3.2, 1.3 Hz, 2H), 5.3 (d, *J* = 11.9 Hz, 1H), 5.0 (t, *J* = 2.6 Hz, 1H), 4.4 (qd, *J* = 7.1, 3.1 Hz, 2H), 3.7 (t, *J* = 12.1 Hz, 1H), 3.6 (t, *J* = 4.7 Hz, 1H), 3.4 (d, *J* = 0.9 Hz, 1H), 2.9 (d, *J* = 3.3 Hz, 1H), 2.7 – 2.6 (m, 1H), 2.5 (ddd, *J* = 12.3, 4.9, 2.1 Hz, 1H), 1.6 (d, *J* = 7.2 Hz, 3H), 1.4 (t, *J* = 7.1 Hz, 3H) ppm. **<sup>13</sup>C NMR** (100 MHz, CDCl<sub>3</sub>) δ 172.6, 150.3, 150.1, 142.4, 129.3, 127.7, 122.8, 120.9, 118.0, 110.6, 110.1, 91.2, 91.1, 78.8, 63.6, 41.8, 41.1, 34.3, 32.7, 16.5, 14.1 ppm. **HRMS**: [M+H]<sup>+</sup> *calcd.* for C<sub>21</sub>H<sub>24</sub>NO<sub>8</sub><sup>+</sup> 418.1497, found 418.1496. [α]<sub>D</sub><sup>20</sup> -20.45 (*c* = 1.50 in CHCl<sub>3</sub>). The enantiomeric excess was determined by HPLC analysis on Daicel Chiralpak AD-H column [*n*-hexane/*i*-PrOH = 90/10, 1 mL/min], λ = 205 nm, *t*<sub>major</sub> = 48.07 min, *t*<sub>minor</sub> = 40.93 min, **ee** = **98%**. The diastereomeric ratio was determined by <sup>1</sup>H NMR, **dr** > **20:1**.

## G. 1 mmol scale reaction

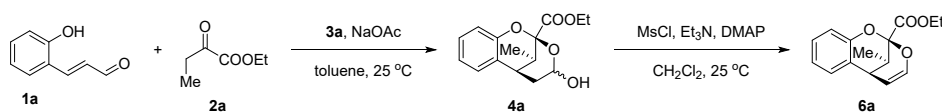

**Detailed method:** A glass vial equipped with a magnetic stirring bar was charged with catalyst **3a** (0.2 mmol, 65 mg, 20 mol%) in toluene (2 mL); then 2-hydroxycinnamaldehyde **1a** (1 mmol, 148 mg, 1.0 equiv.), NaOAc (0.2 mmol, 16 mg, 20 mol%) and the **2a** (1.2 mmol, 156 mg, 1.2 equiv.) was added in one portion and the resulting solution was stirred for about 6 h at 25 °C until the material **1a** disappeared. After completion of the reaction, the crude product was purified by flash chromatography on silica gel (petroleum ether/ethyl acetate = 5/1) to afford **4a**. Then the product **4a** (1 mmol, 278 mg, 1.0 equiv.) was respectively dissolved in CH<sub>2</sub>Cl<sub>2</sub> (5 mL) at 0 °C in the ice

bath. Then Et<sub>3</sub>N (3.0 equiv.), MsCl (2.0 equiv.), DMAP (0.2 equiv.) were added to the reaction mixtures in order. After full conversion of the reaction, the reaction mixture was purified by flash chromatography on silica gel (petroleum ether/ethyl acetate = 30/1) to give product **6a** as white solid 171 mg in 66% yield and **ee** = **99%**. The diastereomeric ratio was determined by <sup>1</sup>H NMR, **dr** = **11:1**.

## H. DFT calculation

### H1. Computational methods

The DFT calculations were performed with Gaussian 09<sup>1</sup>. All geometry optimizations were carried out at the M062X level<sup>2</sup> of theory with the 6-31G(d) basis set. Vibrational frequencies were computed at the same level to verify that optimized structures are local minimums and to evaluate zero-point vibrational energies (ZPVE) and thermal corrections at 298 K. Then the energies of the optimized structures in toluene were computed at the more accurate M062X/6-311+G(d,p) level with the SMD model.

#### Reference

- [1] Frisch, M. J.; Trucks, G. W.; Schlegel, H. B.; Scuseria, G. E.; Robb, M. A.; Cheeseman, J. R.; Scalmani, G.; Barone, V.; Mennucci, B.; Petersson, G. A.; Nakatsuji, H.; Caricato, M.; Li, X.; Hratchian, H. P.; Izmaylov, A. F.; Bloino, J.; Zheng, G.; Sonnenberg, J. L.; Hada, M.; Ehara, M.; Toyota, K.; Fukuda, R.; Hasegawa, J.; Ishida, M.; Nakajima, T.; Honda, Y.; Kitao, O.; Nakai, H.; Vreven, T.; Montgomery, J. A., Jr.; Peralta, J. E.; Ogliaro, F.; Bearpark, M.; Heyd, J. J.; Brothers, E.; Kudin, K. N.; Staroverov, V. N.; Keith, T.; Kobayashi, R.; Normand, J.; Raghavachari, K.; Rendell, A.; Burant, J. C.; Iyengar, S. S.; Tomasi, J.; Cossi, M.; Rega, N.; Millam, J. M.; Klene, M.; Knox, J. E.; Cross, J. B.; Bakken, V.; Adamo, C.; Jaramillo, J.; Gomperts, R.; Stratmann, R. E.; Yazyev, O.; Austin, A. J.; Cammi, R.; Pomelli, C.; Ochterski, J. W.; Martin, R. L.; Morokuma, K.; Zakrzewski, V. G.; Voth, G. A.; Salvador, P.; Dannenberg, J. J.; Dapprich, S.; Daniels, A. D.; Farkas, O.; Foresman, J. B.; Ortiz, J. V.; Cioslowski, J.; Fox, D. J. Gaussian 09, revision D.01; Gaussian Inc.: Wallingford, CT, **2013**.
- [2] Zhao, Y.; Truhlar, D. G., The M06 suite of density functionals for main group thermochemistry, thermochemical kinetics, noncovalent interactions, excited states, and transition elements: two new functionals and systematic testing of four M06-class functionals and 12 other functionals. *Theor. Chem. Acc.* **2008**, *120*, 215-241.

## H2. Computational results

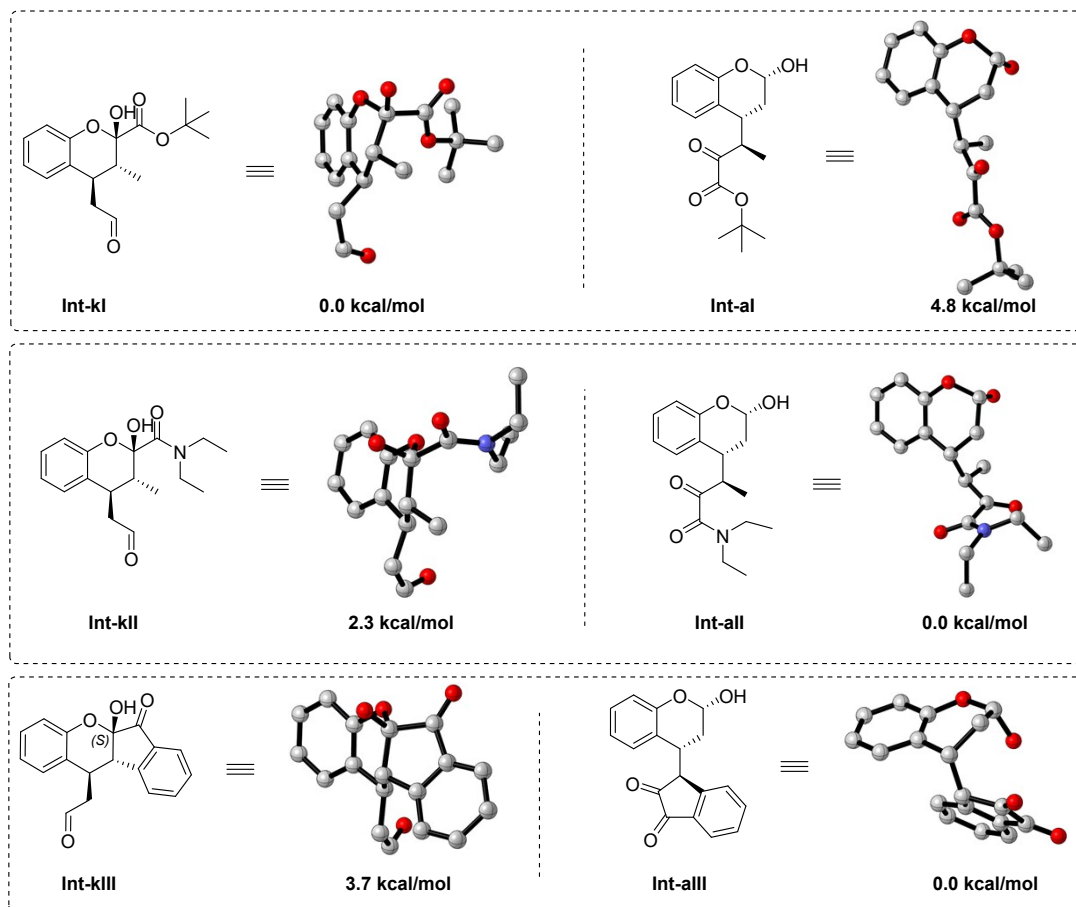

**Figure.** DFT calculation of  $\Delta G_{sol}$  (in kcal mol<sup>-1</sup>) at the SMD (toluene)-M06-2X/6-311+G(d,p)//M06-2X/6-31G(d) level of theory and the computed transition-state.

There were two competitive reaction pathways for the formation of 1) desired hemiketal intermediates via the attack of the phenolic hydroxyl group onto the 2-oxo group and 2) undesired hemiacetal intermediates via the attack of the phenolic hydroxyl group onto the aldehyde carbonyl group. During the reaction of 2-hydroxycinnamaldehyde **1a** and 2-oxocarboxylic ester, the desired hemiketal intermediate (**Int-kl**) is more favorable than the hemiacetal intermediate (**Int-al**); while in the reaction of 2-hydroxycinnamaldehyde **1a** with 2-oxocarboxylic amide **7** and indan-1,2-dione **11**, respectively, both of the undesired hemiacetal intermediates **Int-aII** and **Int-aIII** are more preferred than the corresponding hemiketal intermediates **Int-kII** and **Int-kIII**.

### H3. Coordinates and energies of stationary points

#### Int-kl

|   |           |           |           |
|---|-----------|-----------|-----------|
| C | 2.285375  | 2.750485  | -0.317452 |
| C | 2.231724  | 1.444003  | 0.155429  |
| C | 1.393244  | 0.487124  | -0.424620 |
| C | 0.584384  | 0.894731  | -1.489021 |
| C | 0.630317  | 2.201001  | -1.976853 |
| C | 1.485347  | 3.126507  | -1.395235 |
| H | 2.946227  | 3.470745  | 0.153807  |
| H | 2.837248  | 1.158625  | 1.010761  |
| H | -0.014460 | 2.460642  | 2.810014  |
| H | 1.520563  | 4.141778  | -1.778016 |
| O | -0.284523 | 0.049280  | -2.126363 |
| C | 1.335238  | -0.935058 | 0.096787  |
| H | 0.906304  | -0.896100 | 1.105459  |
| C | 0.442083  | -1.845373 | -0.769516 |
| H | 1.029411  | -2.197060 | -1.629563 |
| C | -0.727692 | -1.114040 | -1.423651 |
| O | -1.308422 | -1.953269 | -2.344480 |
| H | -2.232537 | -1.660006 | -2.443508 |
| C | 2.737292  | -1.553690 | 0.225917  |
| H | 2.710300  | -2.640413 | 0.056546  |
| C | 3.385089  | -1.366706 | 1.576148  |
| O | 2.882896  | -0.787010 | 2.507874  |
| H | 3.421807  | -1.160037 | -0.537992 |
| H | 4.390580  | -1.825287 | 1.680647  |
| C | -0.069524 | -3.047618 | 0.021748  |
| H | 0.757987  | -3.615874 | 0.457328  |
| H | -0.707761 | -2.713025 | 0.848404  |
| H | -0.647441 | -3.715576 | -0.619754 |
| C | -1.833681 | -0.602031 | -0.472861 |
| O | -1.324196 | -0.050023 | 0.614301  |
| O | -3.001339 | -0.655653 | -0.786276 |
| C | -2.120424 | 0.784105  | 1.517127  |
| C | -3.177195 | -0.072405 | 2.203280  |
| H | -3.698400 | 0.529241  | 2.954461  |
| H | -3.906111 | -0.448133 | 1.483249  |
| H | -2.703905 | -0.918657 | 2.711281  |
| C | -1.074955 | 1.285078  | 2.505148  |
| H | -0.601849 | 0.445792  | 3.024047  |
| H | -0.297485 | 1.846933  | 1.977838  |
| H | -1.544831 | 1.936830  | 3.247552  |



|   |           |          |          |
|---|-----------|----------|----------|
| C | -2.720951 | 1.941696 | 0.727732 |
| H | -3.476320 | 1.593117 | 0.021486 |
| H | -3.188269 | 2.645744 | 1.423068 |
| H | -1.930422 | 2.467280 | 0.181830 |

#### Int-al

|   |           |           |           |
|---|-----------|-----------|-----------|
| C | -3.821314 | 2.621163  | -0.098135 |
| C | -2.646125 | 1.920388  | -0.334628 |
| C | -2.619100 | 0.522071  | -0.401064 |
| C | -3.832975 | -0.155124 | -0.222595 |
| C | -5.020521 | 0.538055  | 0.016848  |
| C | -5.016374 | 1.923235  | 0.073785  |
| H | -3.806709 | 3.705259  | -0.055850 |
| H | -1.725654 | 2.475878  | -0.494872 |
| H | -5.928246 | -0.039981 | 0.154378  |
| H | -5.942902 | 2.458003  | 0.257946  |
| O | -3.925086 | -1.519172 | -0.287068 |
| C | -1.345079 | -0.234613 | -0.754243 |
| H | -1.117729 | 0.007842  | -1.799522 |
| C | -1.559013 | -1.767674 | -0.699308 |
| H | -1.729125 | -2.137629 | -1.714261 |
| H | -0.669809 | -2.281171 | -0.325127 |
| C | -2.754511 | -2.199648 | 0.140464  |
| H | -2.971203 | -3.256579 | -0.020390 |
| O | -2.568546 | -2.060474 | 1.518035  |
| H | -2.448368 | -1.118399 | 1.714869  |
| C | -0.124991 | 0.255045  | 0.050783  |
| H | -0.047318 | 1.346473  | -0.034658 |
| C | 1.158524  | -0.263198 | -0.568229 |
| C | 2.456878  | 0.386053  | -0.023574 |
| O | 1.221955  | -1.064920 | -1.465919 |
| O | 2.434532  | 1.443803  | 0.562419  |
| O | 3.516632  | -0.344937 | -0.317339 |
| C | 4.861857  | 0.109620  | 0.040860  |
| C | -0.170657 | -0.057807 | 1.553282  |
| H | -0.247392 | -1.131908 | 1.744017  |
| H | 0.717241  | 0.331421  | 2.056013  |
| H | -1.037326 | 0.444344  | 1.998521  |
| C | 5.746566  | -1.019301 | -0.471055 |
| H | 5.611262  | -1.150608 | -1.548011 |
| H | 6.796648  | -0.787119 | -0.272075 |
| H | 5.493429  | -1.958561 | 0.028442  |
| C | 5.169774  | 1.414999  | -0.685555 |
| H | 5.020993  | 1.289345  | -1.762340 |

|   |          |           |           |
|---|----------|-----------|-----------|
| H | 4.536545 | 2.227876  | -0.326851 |
| H | 6.216704 | 1.682373  | -0.512503 |
| C | 4.979821 | 0.246419  | 1.555912  |
| H | 4.377030 | 1.074543  | 1.930972  |
| H | 4.662268 | -0.681076 | 2.042509  |
| H | 6.027201 | 0.427179  | 1.816478  |

#### Int-klI

|   |           |           |           |
|---|-----------|-----------|-----------|
| C | 3.763714  | 2.014621  | 0.226621  |
| C | 3.351010  | 0.698544  | 0.025101  |
| C | 1.997657  | 0.374638  | -0.033684 |
| C | 1.074136  | 1.413359  | 0.101555  |
| C | 1.463136  | 2.729843  | 0.297245  |
| C | 2.820783  | 3.028032  | 0.368611  |
| H | 4.823188  | 2.244021  | 0.276319  |
| H | 4.103898  | -0.078111 | -0.072479 |
| H | 0.699056  | 3.494369  | 0.387519  |
| H | 3.140412  | 4.053443  | 0.525821  |
| O | -0.266903 | 1.108227  | 0.076349  |
| C | 1.418375  | -1.013508 | -0.225061 |
| H | 1.037294  | -1.351550 | 0.748536  |
| C | 0.254995  | -0.946380 | -1.242092 |
| H | 0.709961  | -0.766646 | -2.222235 |
| C | -0.655064 | 0.311851  | -1.046155 |
| O | -0.566585 | 1.047968  | -2.213219 |
| H | -1.480751 | 1.304698  | -2.444229 |
| C | 2.470416  | -2.033527 | -0.654744 |
| H | 2.000633  | -2.948872 | -1.040417 |
| C | 3.369146  | -2.487149 | 0.472176  |
| O | 3.170641  | -2.248212 | 1.636867  |
| H | 3.089061  | -1.652515 | -1.478396 |
| H | 4.242294  | -3.100251 | 0.164463  |
| C | -0.560938 | -2.239397 | -1.336900 |
| H | 0.036358  | -3.056846 | -1.748640 |
| H | -0.941695 | -2.558633 | -0.360991 |
| H | -1.415046 | -2.098320 | -2.007187 |
| C | -2.175547 | 0.043824  | -0.800166 |
| O | -2.942551 | 0.351466  | -1.711522 |
| C | -4.081051 | -0.595651 | 0.496794  |
| H | -4.262570 | -1.265684 | 1.343080  |
| H | -4.458723 | -1.079556 | -0.408208 |
| C | -1.814440 | -0.821315 | 1.522771  |
| H | -2.112169 | -1.830155 | 1.836331  |
| H | -0.773030 | -0.868596 | 1.220054  |

|   |           |           |           |
|---|-----------|-----------|-----------|
| C | -1.960917 | 0.163564  | 2.676568  |
| H | -2.987869 | 0.189880  | 3.053613  |
| H | -1.306438 | -0.130016 | 3.502284  |
| H | -1.677625 | 1.164576  | 2.341482  |
| C | -4.789953 | 0.740511  | 0.699715  |
| H | -4.616206 | 1.385848  | -0.163308 |
| H | -5.867409 | 0.580196  | 0.801913  |
| H | -4.429547 | 1.247955  | 1.598452  |
| N | -2.626093 | -0.463715 | 0.364043  |

#### Int-all

|   |           |           |           |
|---|-----------|-----------|-----------|
| C | -3.800643 | 2.356699  | 0.443117  |
| C | -2.518772 | 1.825759  | 0.491326  |
| C | -2.207063 | 0.603332  | -0.114276 |
| C | -3.235975 | -0.074532 | -0.779609 |
| C | -4.528496 | 0.448855  | -0.833587 |
| C | -4.808932 | 1.664162  | -0.228022 |
| H | -4.010596 | 3.309104  | 0.918576  |
| H | -1.730255 | 2.383418  | 0.990184  |
| H | -5.288660 | -0.121025 | -1.357257 |
| H | -5.814594 | 2.070106  | -0.275333 |
| O | -3.027878 | -1.266135 | -1.423411 |
| C | -0.780275 | 0.078059  | -0.140397 |
| H | -0.216072 | 0.783202  | -0.763274 |
| C | -0.692517 | -1.310110 | -0.819625 |
| H | -0.379799 | -1.183477 | -1.861059 |
| H | 0.051412  | -1.948430 | -0.328512 |
| C | -2.015104 | -2.071984 | -0.843166 |
| H | -1.943172 | -2.943531 | -1.494988 |
| O | -2.409689 | -2.562989 | 0.400718  |
| H | -2.544253 | -1.810900 | 0.998594  |
| C | -0.092379 | 0.125417  | 1.252972  |
| H | -0.082621 | 1.175976  | 1.564992  |
| C | 1.365765  | -0.242021 | 1.068926  |
| C | 2.167107  | 0.731225  | 0.179617  |
| O | 1.901953  | -1.173334 | 1.625874  |
| O | 1.884691  | 1.922627  | 0.258736  |
| C | 3.972637  | 1.247853  | -1.302038 |
| H | 4.513116  | 0.722139  | -2.094653 |
| H | 3.292724  | 1.966913  | -1.768696 |
| C | -0.735125 | -0.736678 | 2.328275  |
| H | -0.690454 | -1.798853 | 2.071258  |
| H | -0.213707 | -0.611254 | 3.280183  |

|   |           |           |           |
|---|-----------|-----------|-----------|
| H | -1.778893 | -0.436635 | 2.476821  |
| C | 3.475160  | -1.163943 | -0.797337 |
| H | 2.606280  | -1.763060 | -0.526993 |
| H | 3.644906  | -1.306781 | -1.870767 |
| C | 4.690712  | -1.615626 | 0.002360  |
| H | 4.884151  | -2.678017 | -0.172167 |
| H | 5.585481  | -1.056886 | -0.289044 |
| H | 4.504560  | -1.463097 | 1.067857  |
| C | 4.938735  | 1.981317  | -0.376836 |
| H | 5.516243  | 2.716537  | -0.944951 |
| H | 4.380427  | 2.507554  | 0.400166  |
| H | 5.636335  | 1.286038  | 0.098140  |
| N | 3.159403  | 0.250414  | -0.600658 |

#### Int-kIII

|   |           |           |           |
|---|-----------|-----------|-----------|
| C | -4.302782 | 0.227926  | -0.511770 |
| C | -3.103216 | 0.930463  | -0.406573 |
| C | -1.926997 | 0.274009  | -0.057737 |
| C | -1.983552 | -1.104071 | 0.162156  |
| C | -3.165134 | -1.821662 | 0.064787  |
| C | -4.333795 | -1.142465 | -0.270373 |
| H | -5.213527 | 0.755740  | -0.774988 |
| H | -3.099562 | 2.002241  | -0.583746 |
| H | -3.148528 | -2.889877 | 0.250668  |
| H | -5.268718 | -1.688312 | -0.348893 |
| O | -0.831284 | -1.751039 | 0.550697  |
| C | -0.552322 | 0.891083  | 0.083983  |
| H | -0.258232 | 0.821344  | 1.141797  |
| C | 0.406050  | -0.011217 | -0.730325 |
| H | 0.097927  | 0.023129  | -1.782838 |
| C | 0.300922  | -1.471960 | -0.206946 |
| O | 0.330564  | -2.407277 | -1.258924 |
| H | 1.079512  | -2.197843 | -1.837992 |
| C | -0.484043 | 2.355617  | -0.321012 |
| H | 0.560135  | 2.696635  | -0.355433 |
| C | -1.181850 | 3.277173  | 0.654270  |
| O | -1.601056 | 2.929748  | 1.728340  |
| H | -0.891518 | 2.522134  | -1.328069 |
| H | -1.267484 | 4.335042  | 0.327744  |
| C | 1.552585  | -1.661088 | 0.696360  |
| O | 1.713950  | -2.540399 | 1.501550  |
| C | 2.506024  | -0.594560 | 0.305455  |
| C | 1.879090  | 0.307137  | -0.556983 |

|   |          |           |           |
|---|----------|-----------|-----------|
| C | 3.848321 | -0.479252 | 0.654313  |
| C | 2.626882 | 1.335545  | -1.127234 |
| C | 4.581350 | 0.565205  | 0.104535  |
| H | 4.293233 | -1.203052 | 1.330752  |
| C | 3.973378 | 1.456650  | -0.786836 |
| H | 2.178822 | 2.026634  | -1.836407 |
| H | 5.631425 | 0.685818  | 0.350737  |
| H | 4.563657 | 2.254899  | -1.227040 |

#### Int-aIII

|   |           |           |           |
|---|-----------|-----------|-----------|
| C | -3.676176 | 0.581354  | -1.411702 |
| C | -2.583519 | -0.253389 | -1.610087 |
| C | -1.806185 | -0.702313 | -0.540938 |
| C | -2.169952 | -0.322005 | 0.754248  |
| C | -3.265877 | 0.515622  | 0.966783  |
| C | -4.008132 | 0.972208  | -0.113307 |
| H | -4.265565 | 0.921508  | -2.256687 |
| H | -2.306008 | -0.559811 | -2.616814 |
| H | -3.513524 | 0.791725  | 1.986425  |
| H | -4.856933 | 1.626556  | 0.059842  |
| O | -1.517012 | -0.746337 | 1.880239  |
| C | -0.559506 | -1.521346 | -0.745790 |
| H | -0.715895 | -2.203612 | -1.587932 |
| C | -0.366127 | -2.401059 | 0.496554  |
| H | -1.199703 | -3.110161 | 0.538843  |
| H | 0.561581  | -2.975045 | 0.453328  |
| C | -0.373375 | -1.577722 | 1.764254  |
| H | -0.414284 | -2.206806 | 2.660730  |
| O | 0.795832  | -0.810742 | 1.750703  |
| H | 0.741446  | -0.145190 | 2.453485  |
| C | 0.837769  | 0.786267  | -0.597661 |
| C | 2.146724  | 0.980866  | -0.134724 |
| C | -0.052434 | 1.857443  | -0.552311 |
| C | 2.583056  | 2.191466  | 0.392690  |
| C | 0.379949  | 3.073949  | -0.021626 |
| H | -1.067515 | 1.767043  | -0.924050 |
| C | 1.682568  | 3.247567  | 0.453660  |
| H | 3.607710  | 2.285459  | 0.740788  |
| H | -0.315802 | 3.907118  | 0.016382  |
| H | 1.988393  | 4.207705  | 0.857132  |
| C | 1.988673  | -1.282613 | -0.933786 |
| C | 2.940535  | -0.252055 | -0.277120 |
| C | 0.639704  | -0.610188 | -1.182174 |

|   |          |           |           |
|---|----------|-----------|-----------|
| H | 0.535742 | -0.497275 | -2.270935 |
| O | 2.279751 | -2.420589 | -1.192024 |
| O | 4.090702 | -0.461522 | 0.017041  |

**The  $^1\text{H}$  NMR spectrum of 5a (400 MHz,  $\text{CDCl}_3$ )**

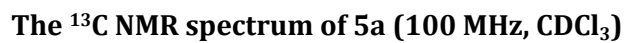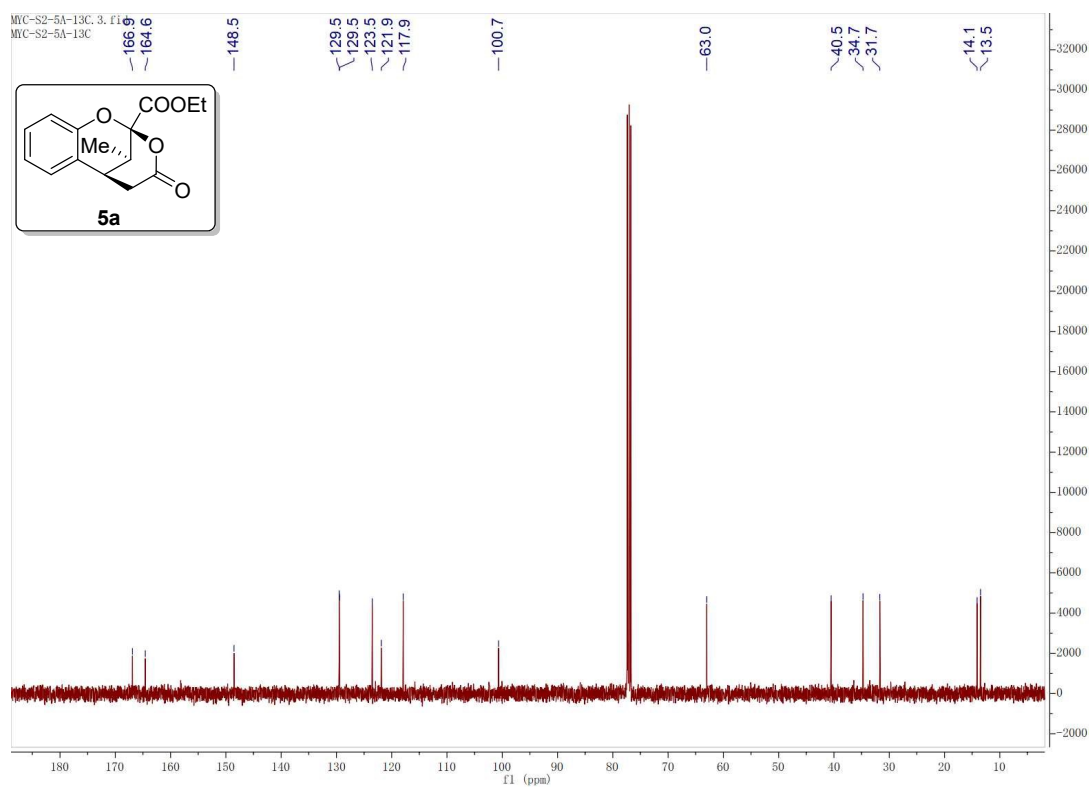

## The HPLC of racemic 5a

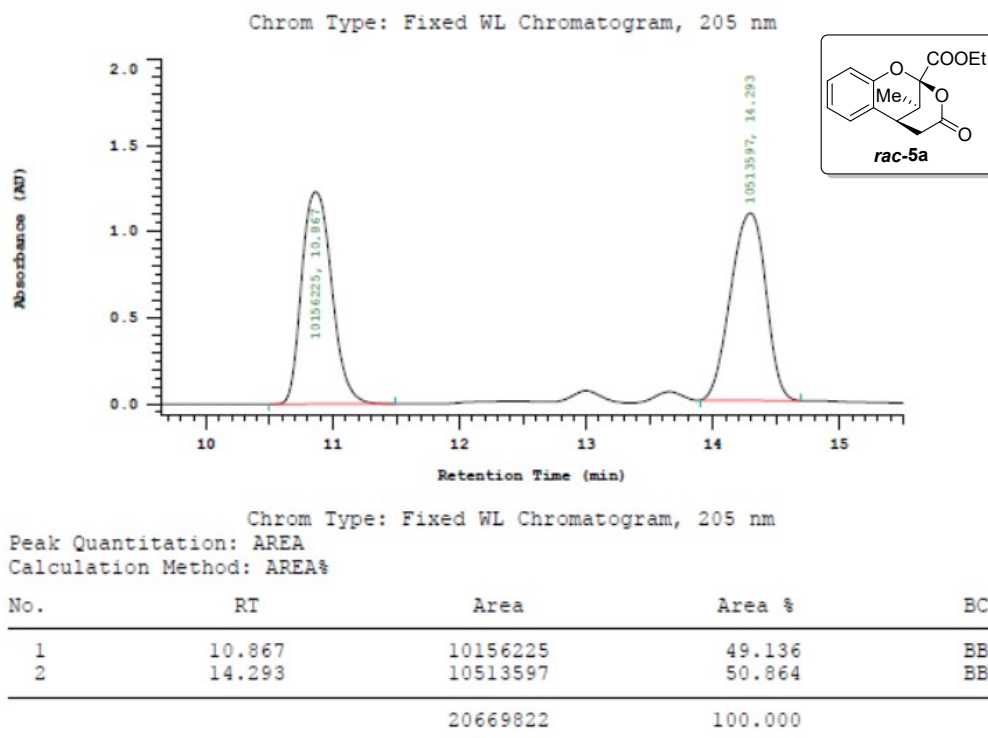

## The HPLC of chiral 5a

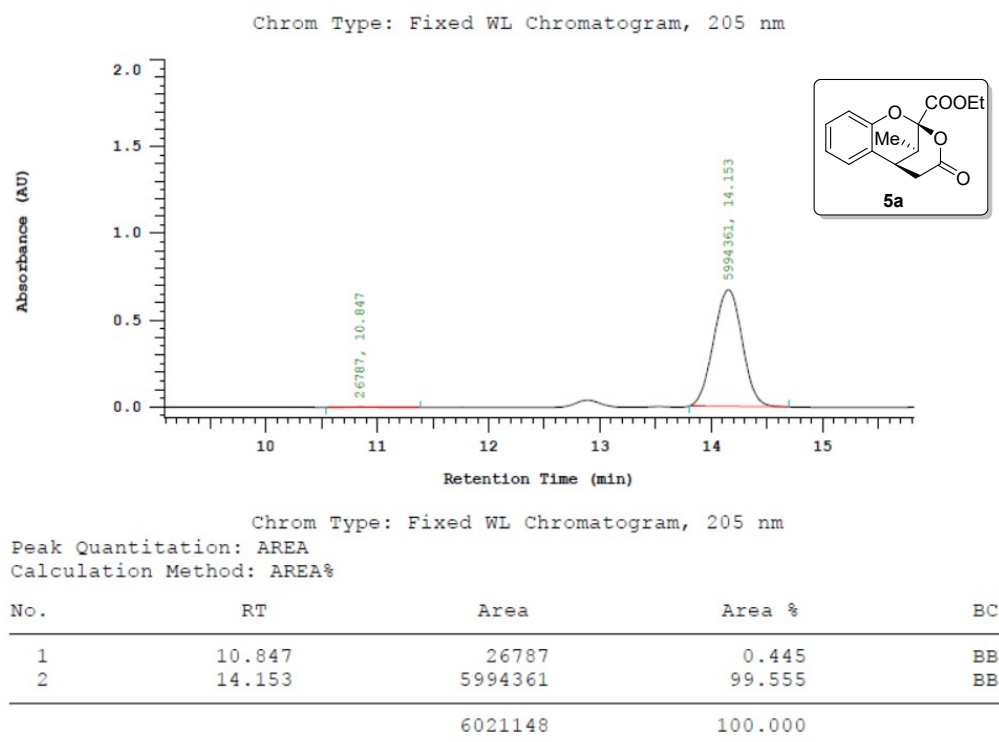



### The $^1\text{H}$ NMR spectrum of 5b (400 MHz, $\text{CDCl}_3$ )

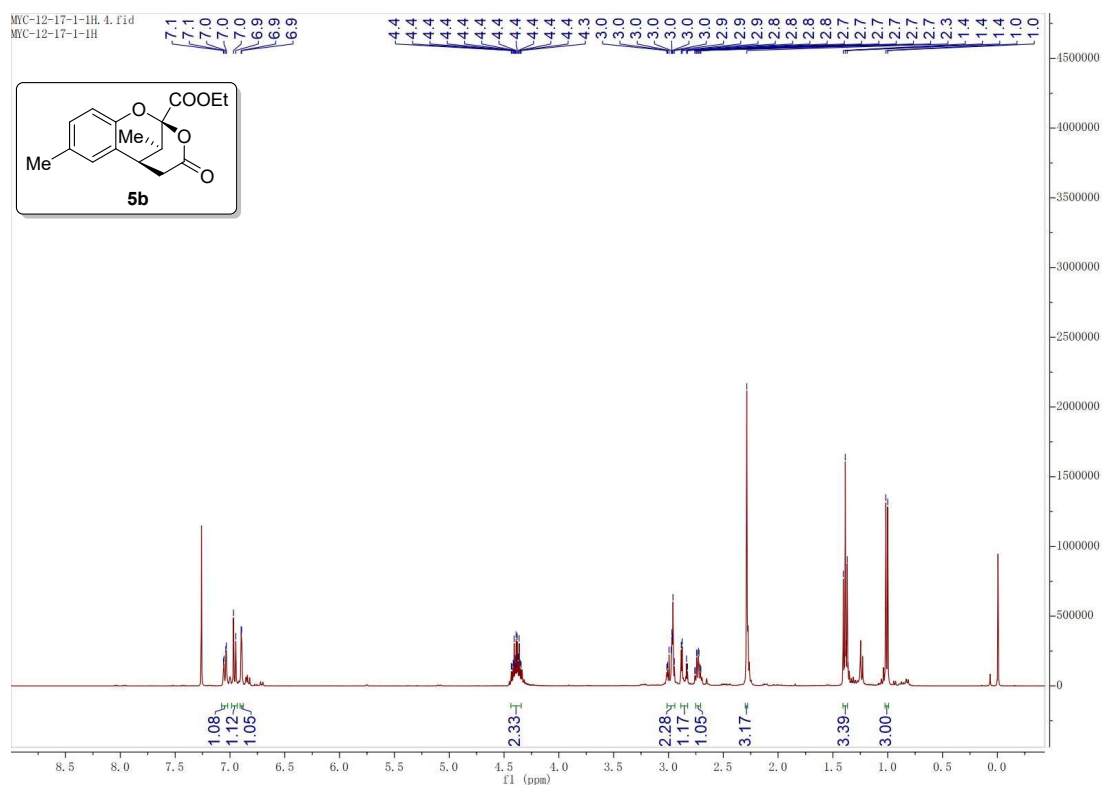

### The $^{13}\text{C}$ NMR spectrum of 5b (100 MHz, $\text{CDCl}_3$ )

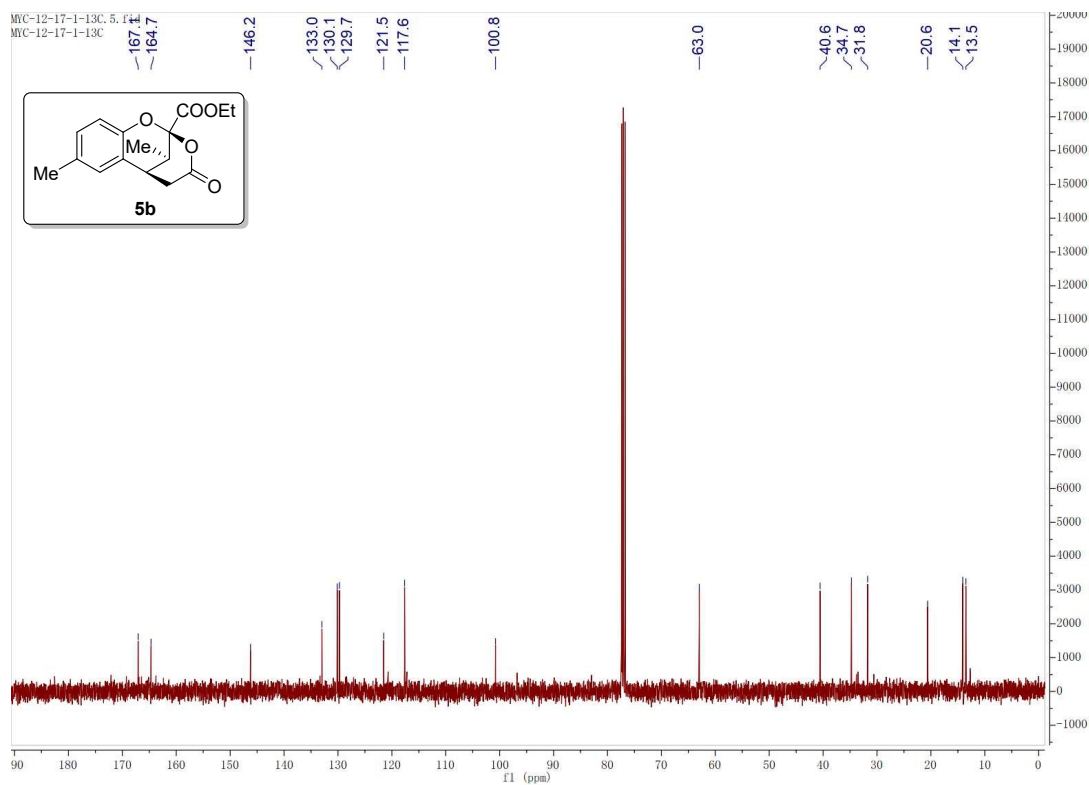

## The HPLC of racemic 5b

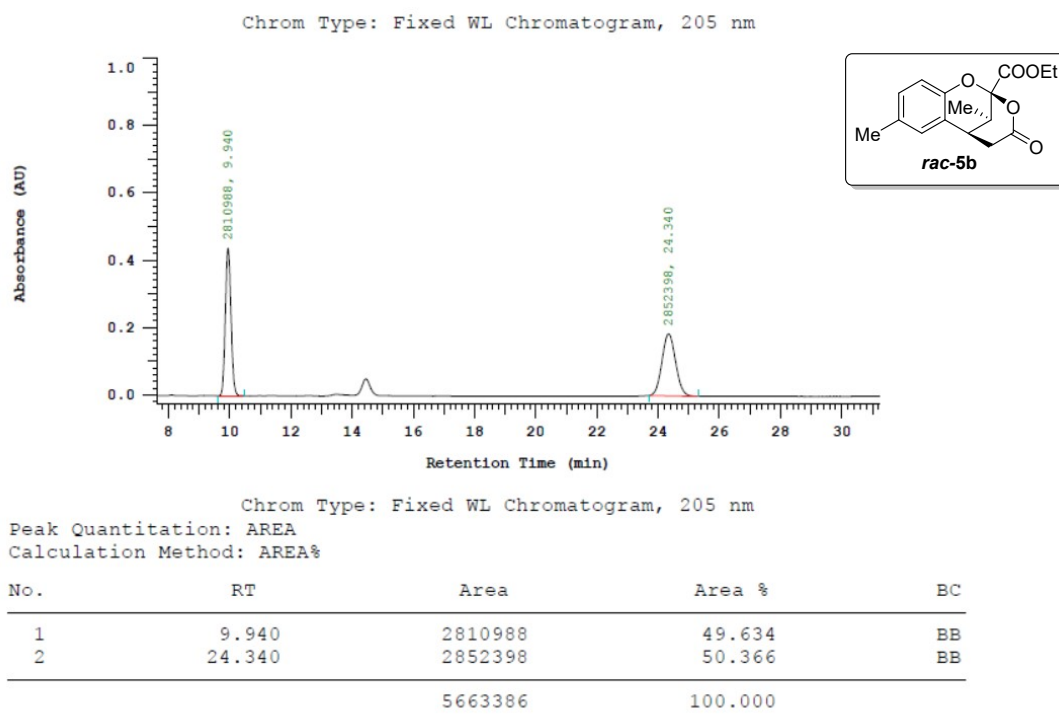

## The HPLC of chiral 5b

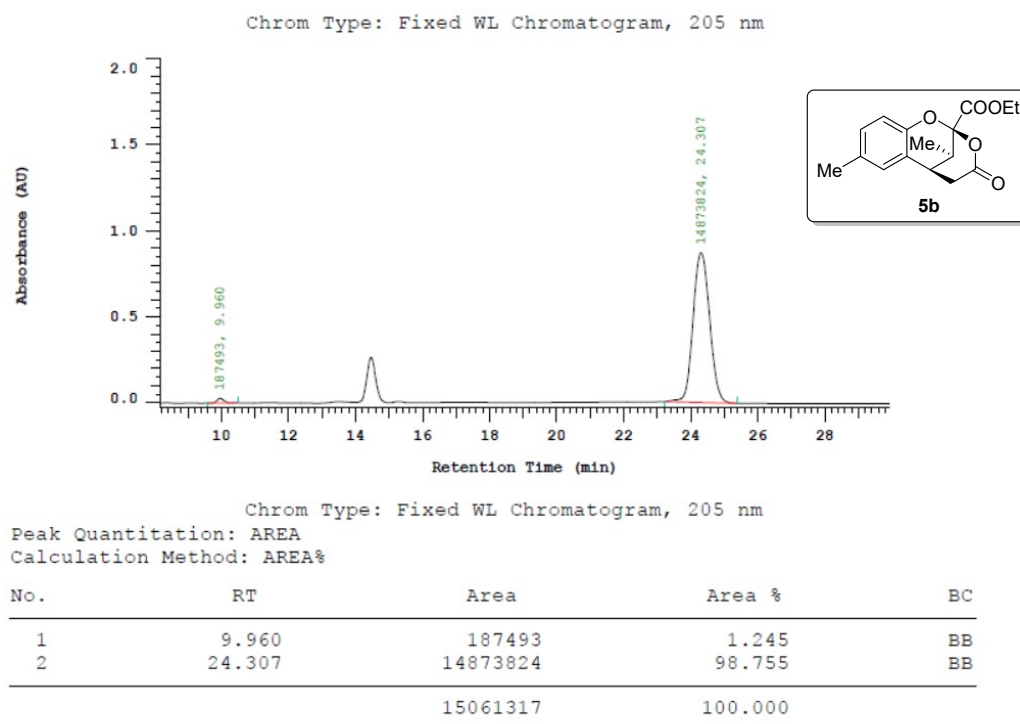

### The $^1\text{H}$ NMR spectrum of **5i** (400 MHz, $\text{CDCl}_3$ )

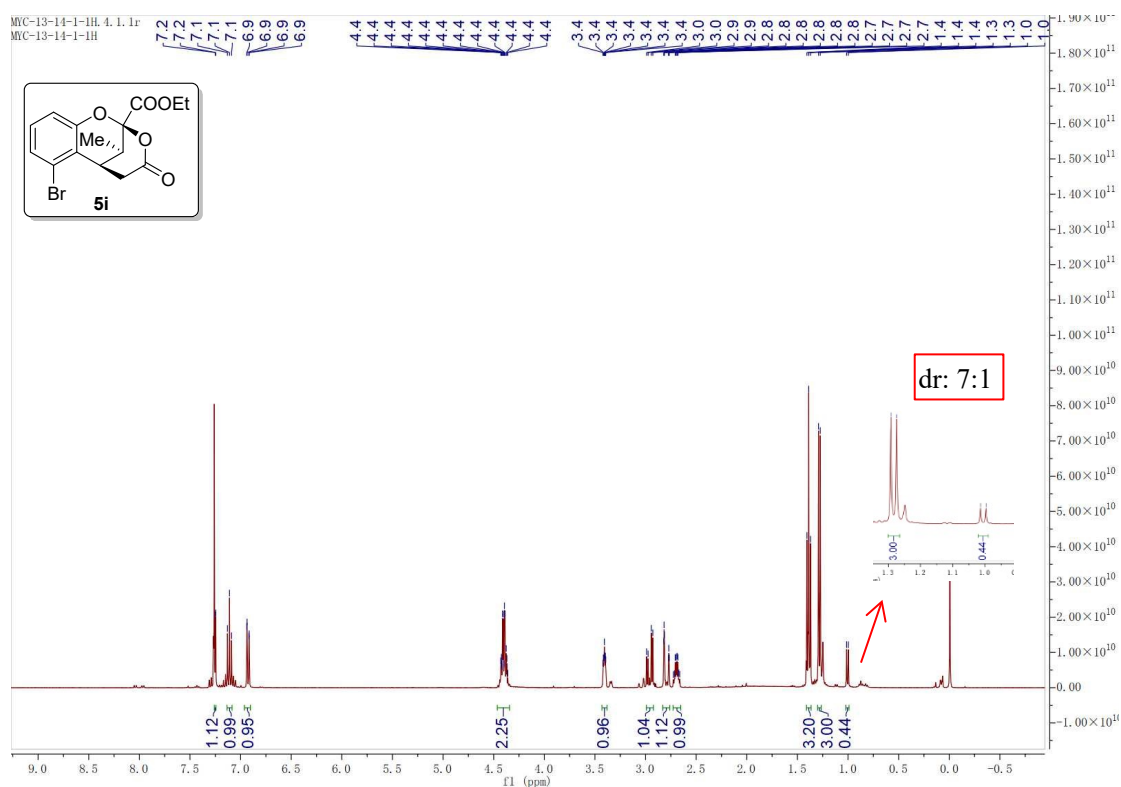

### The $^{13}\text{C}$ NMR spectrum of **5i** (100 MHz, $\text{CDCl}_3$ )

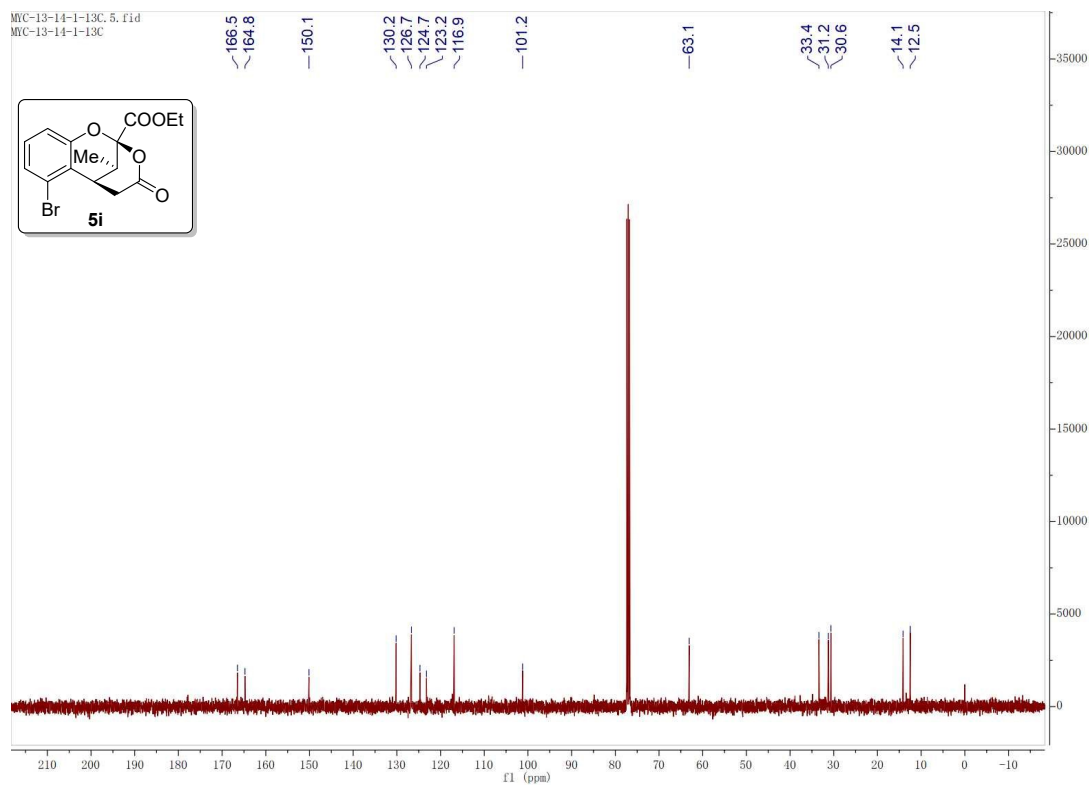

## The HPLC of racemic 5i

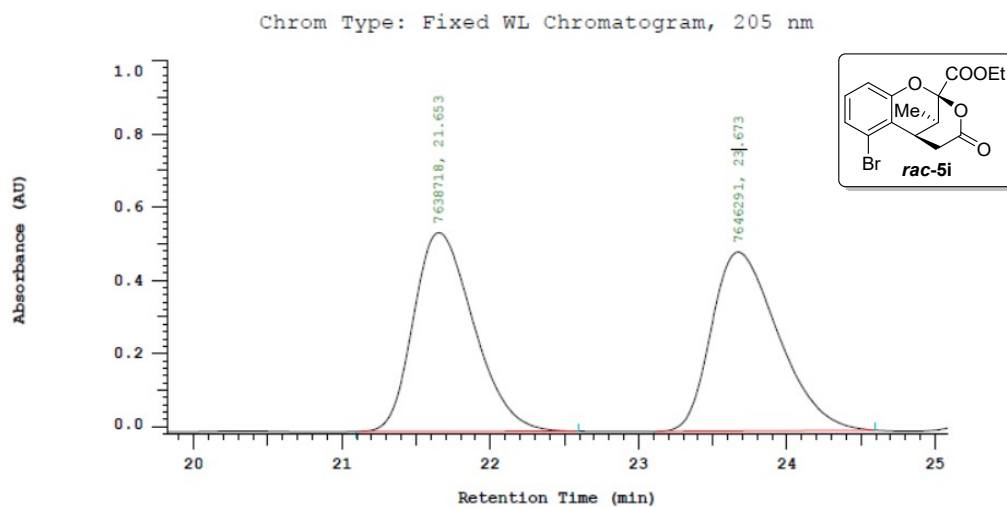

Chrom Type: Fixed WL Chromatogram, 205 nm  
Peak Quantitation: AREA  
Calculation Method: AREA%

| No. | RT     | Area     | Area %  | BC |
|-----|--------|----------|---------|----|
| 1   | 21.653 | 7638718  | 49.975  | BB |
| 2   | 23.673 | 7646291  | 50.025  | BB |
|     |        | 15285009 | 100.000 |    |

## The HPLC of chiral 5i

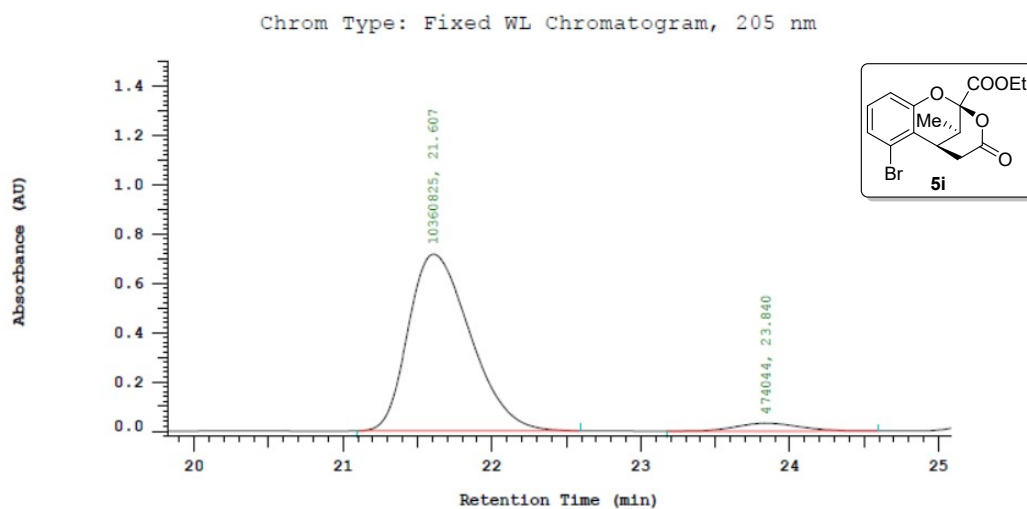

Chrom Type: Fixed WL Chromatogram, 205 nm  
Peak Quantitation: AREA  
Calculation Method: AREA%

| No. | RT     | Area     | Area %  | BC |
|-----|--------|----------|---------|----|
| 1   | 21.607 | 10360825 | 95.625  | BB |
| 2   | 23.840 | 474044   | 4.375   | BB |
|     |        | 10834869 | 100.000 |    |



### The $^1\text{H}$ NMR spectrum of 5' (400 MHz, $\text{CDCl}_3$ )

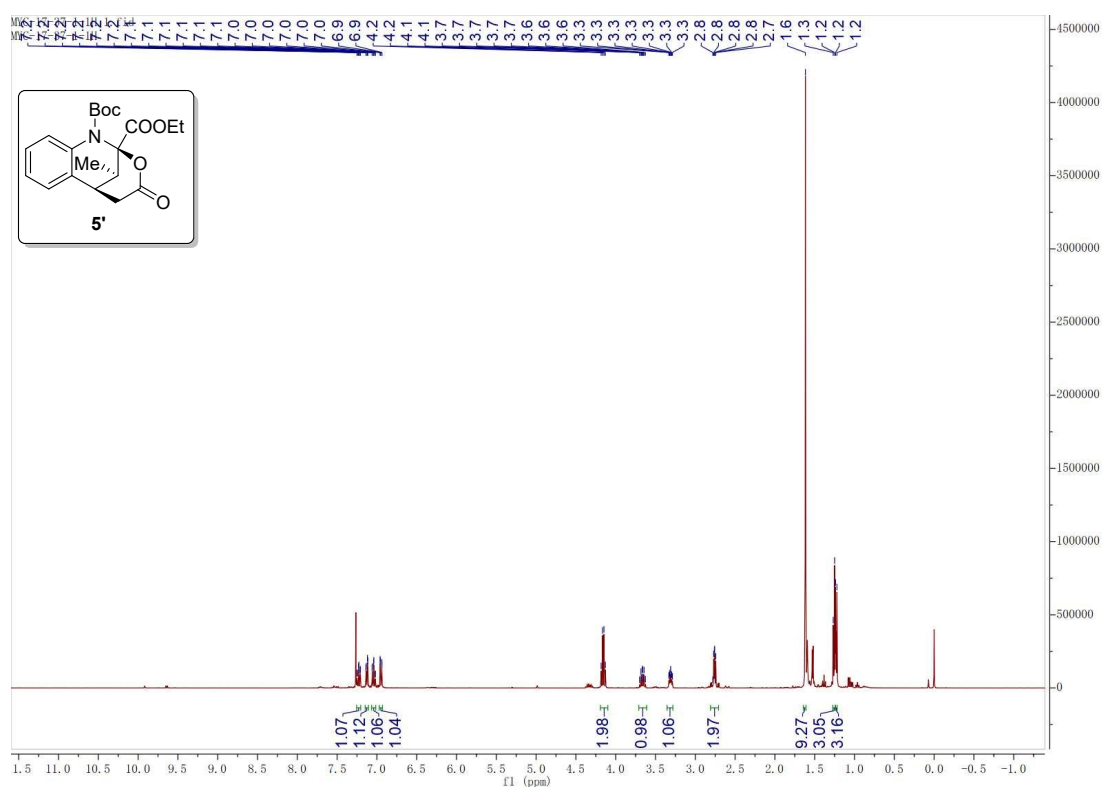

### The $^{13}\text{C}$ NMR spectrum of 5' (100 MHz, $\text{CDCl}_3$ )

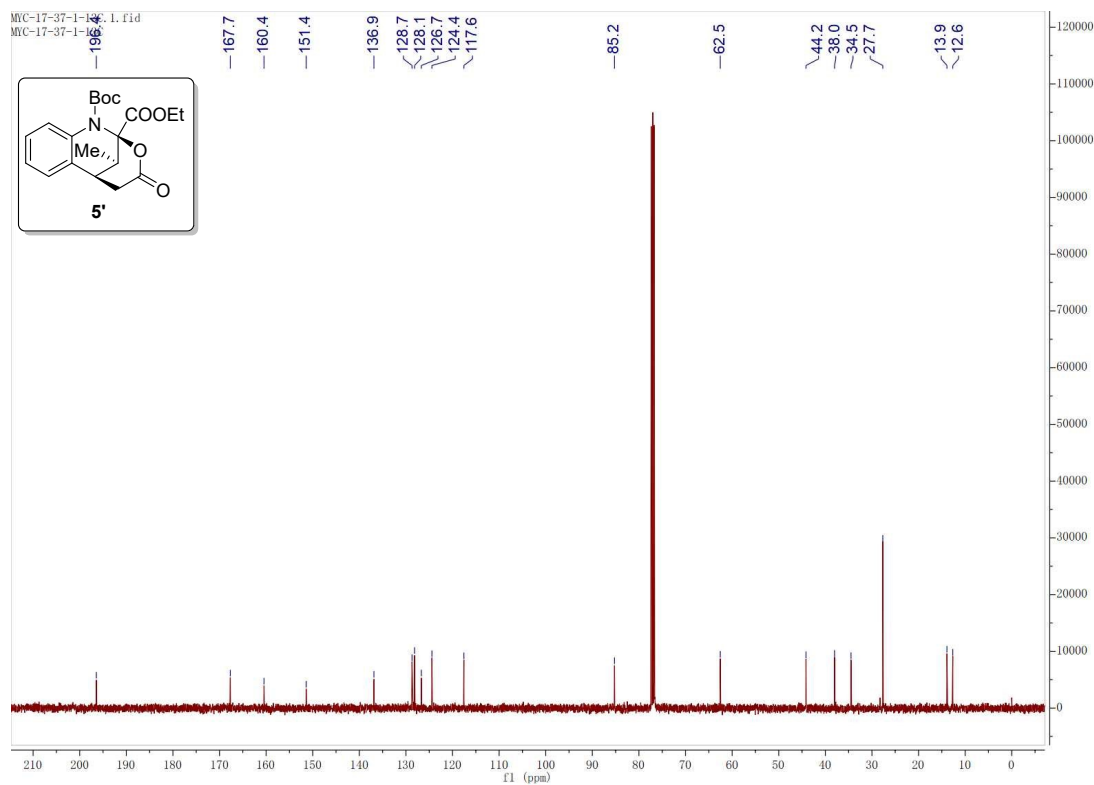

## The HPLC of racemic 5'

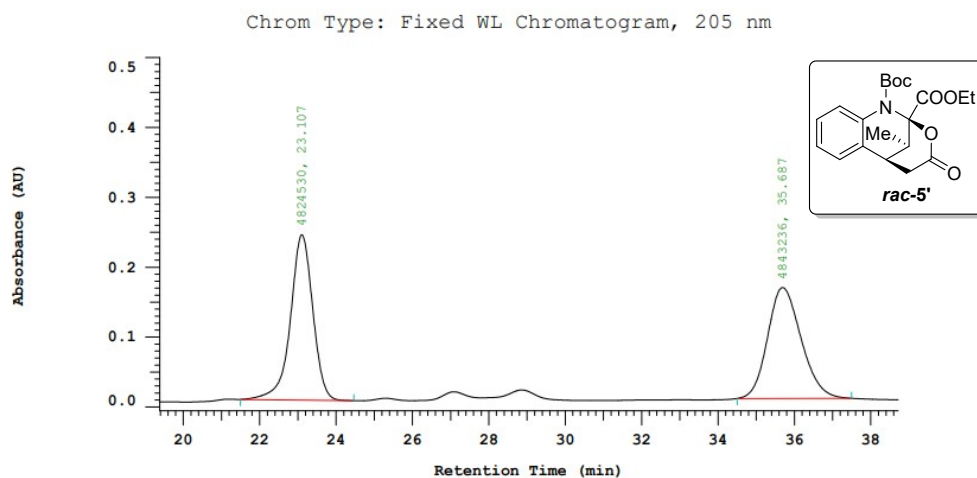

Chrom Type: Fixed WL Chromatogram, 205 nm  
 Peak Quantitation: AREA  
 Calculation Method: AREA%

| No. | RT     | Area    | Area %  | BC |
|-----|--------|---------|---------|----|
| 1   | 23.107 | 4824530 | 49.903  | BB |
| 2   | 35.687 | 4843236 | 50.097  | BB |
|     |        | 9667766 | 100.000 |    |

## The HPLC of chiral 5'

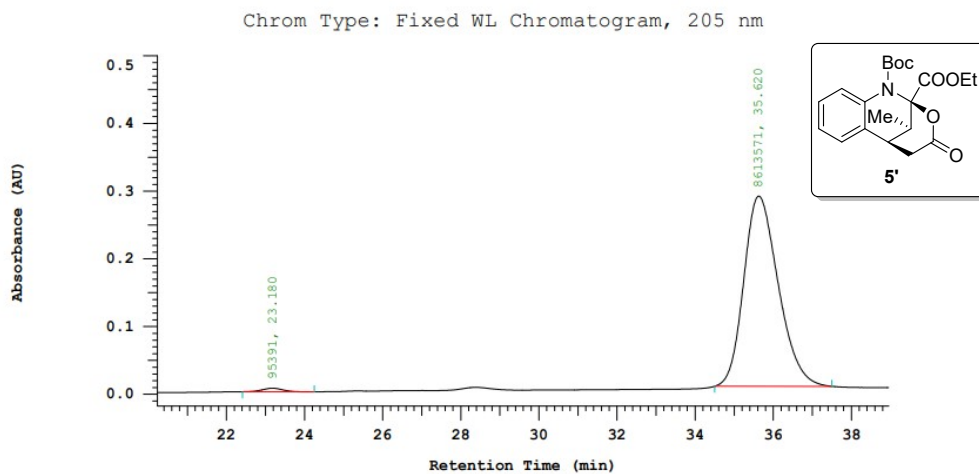

Chrom Type: Fixed WL Chromatogram, 205 nm  
 Peak Quantitation: AREA  
 Calculation Method: AREA%

| No. | RT     | Area    | Area %  | BC |
|-----|--------|---------|---------|----|
| 1   | 23.180 | 95391   | 1.095   | BB |
| 2   | 35.620 | 8613571 | 98.905  | BB |
|     |        | 8708962 | 100.000 |    |

### The $^1\text{H}$ NMR spectrum of 6a (400 MHz, $\text{CDCl}_3$ )

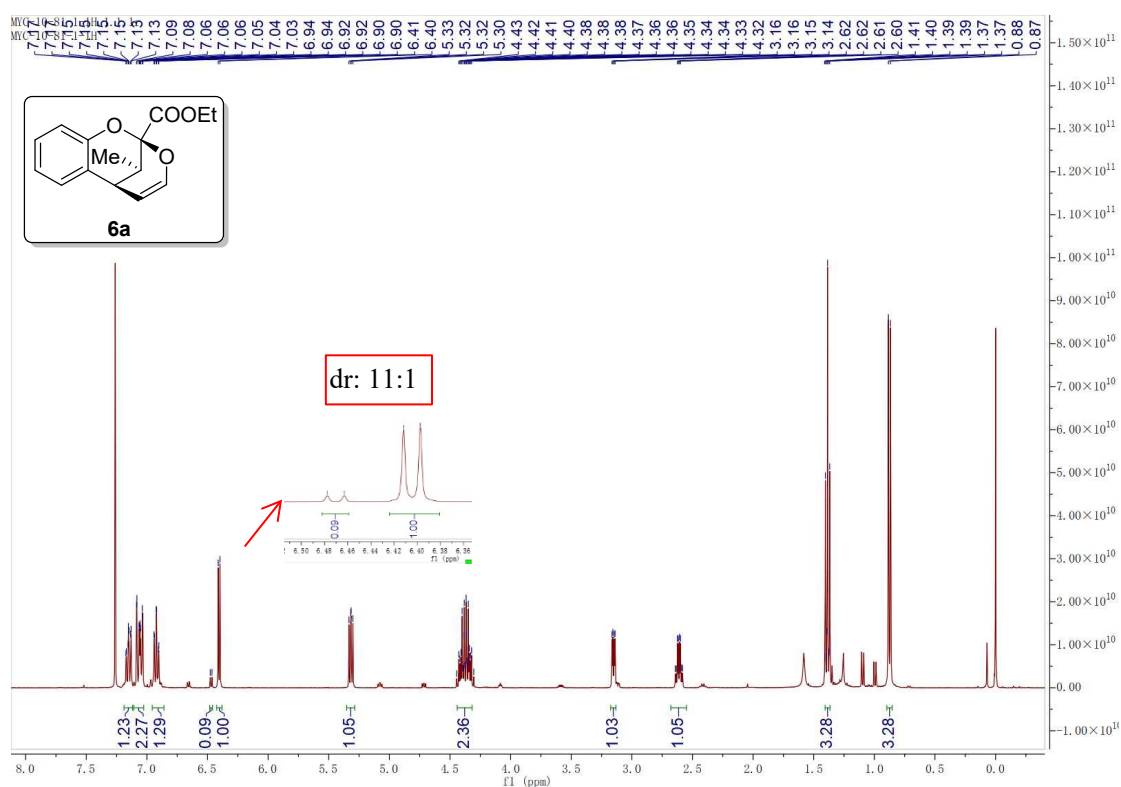

### The $^{13}\text{C}$ NMR spectrum of 6a (100 MHz, $\text{CDCl}_3$ )

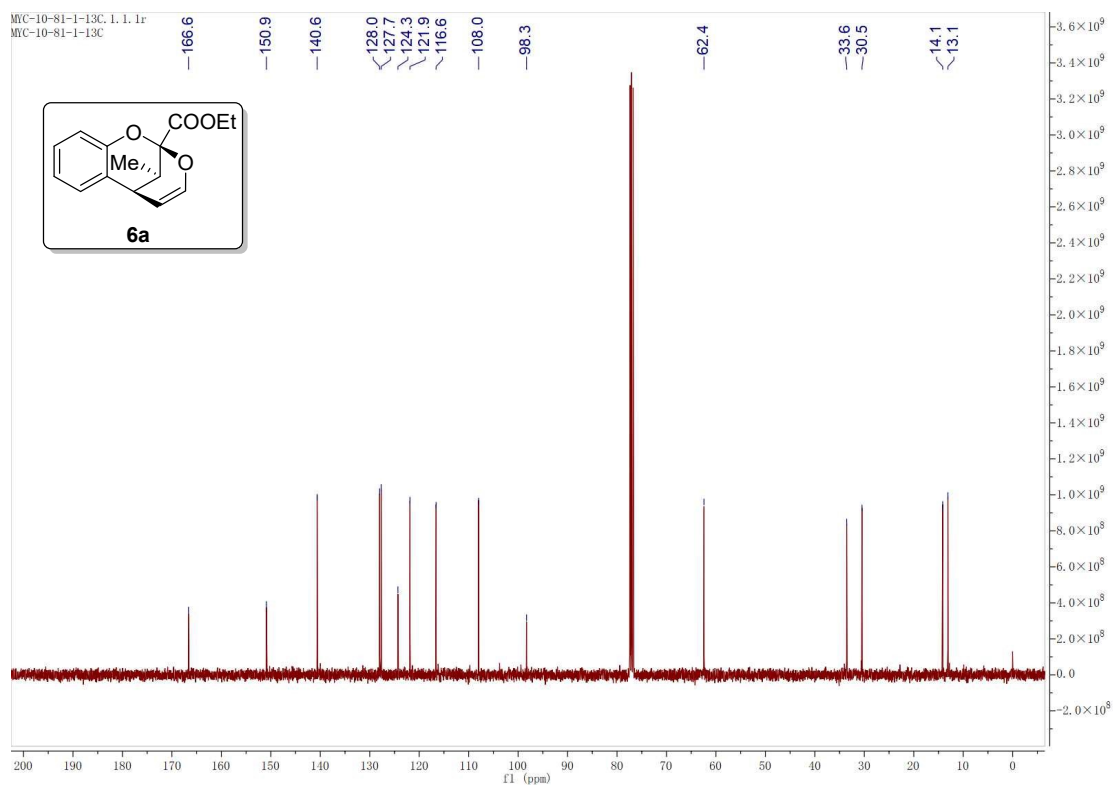



## The HPLC of racemic 6a

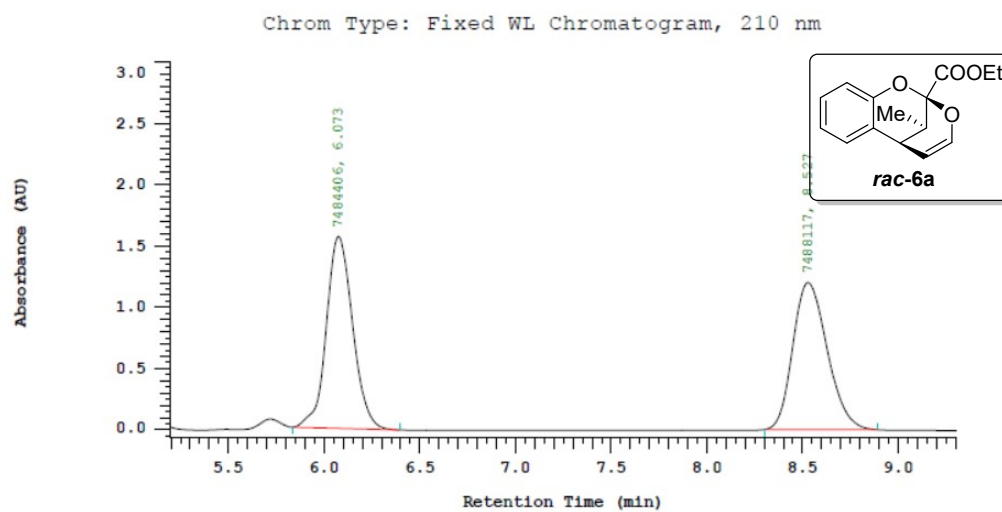

Chrom Type: Fixed WL Chromatogram, 210 nm  
 Peak Quantitation: AREA  
 Calculation Method: AREA%

| No. | RT    | Area     | Area %  | BC |
|-----|-------|----------|---------|----|
| 1   | 6.073 | 7484406  | 49.988  | BB |
| 2   | 8.527 | 7488117  | 50.012  | BB |
|     |       | 14972523 | 100.000 |    |

## The HPLC of chiral 6a

Chrom Type: Fixed WL Chromatogram, 210 nm

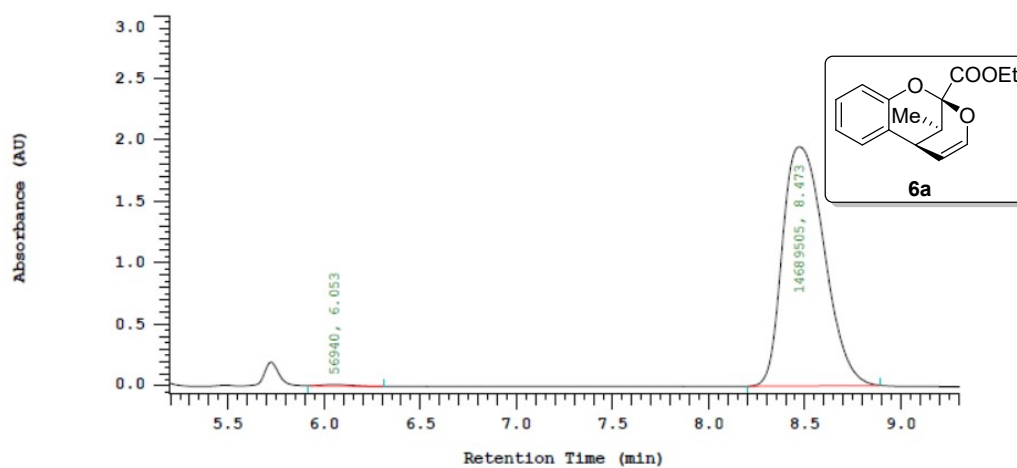

Chrom Type: Fixed WL Chromatogram, 210 nm

Peak Quantitation: AREA

Calculation Method: AREA%

| No. | RT    | Area     | Area %  | BC |
|-----|-------|----------|---------|----|
| 1   | 6.053 | 56940    | 0.386   | BB |
| 2   | 8.473 | 14689505 | 99.614  | BB |
|     |       | 14746445 | 100.000 |    |

### The $^1\text{H}$ NMR spectrum of 6b (400 MHz, $\text{CDCl}_3$ )

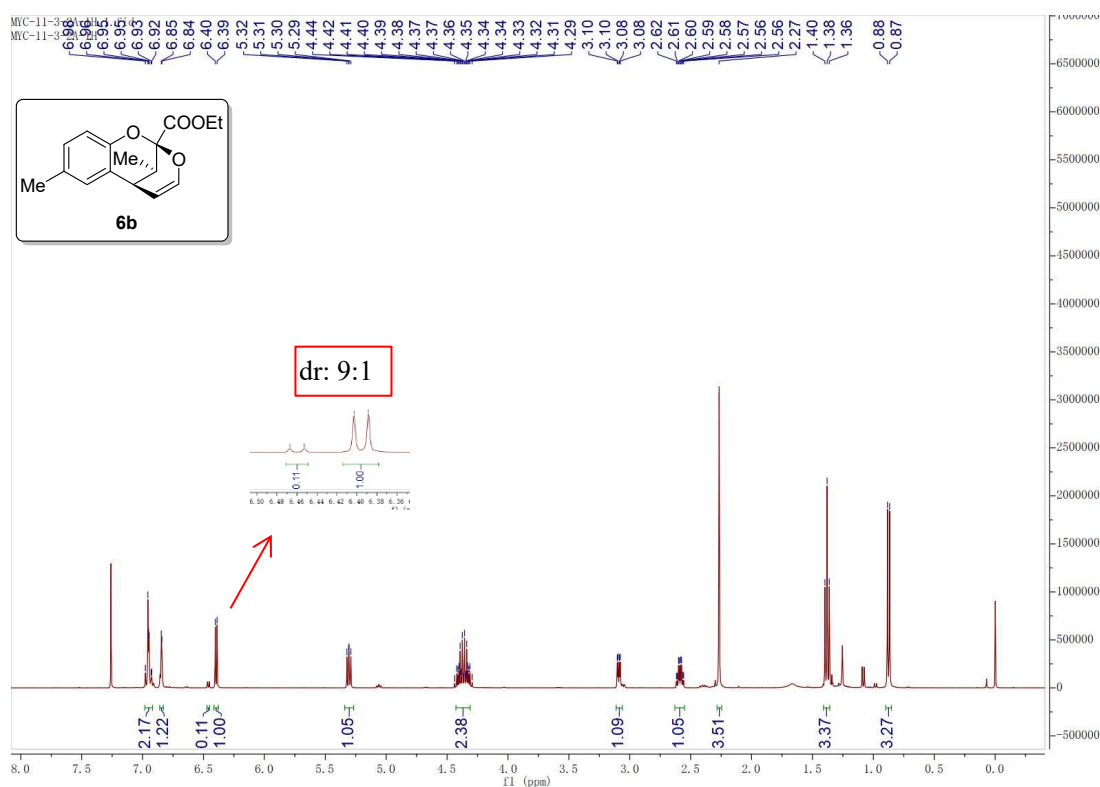

### The $^{13}\text{C}$ NMR spectrum of 6b (100 MHz, $\text{CDCl}_3$ )

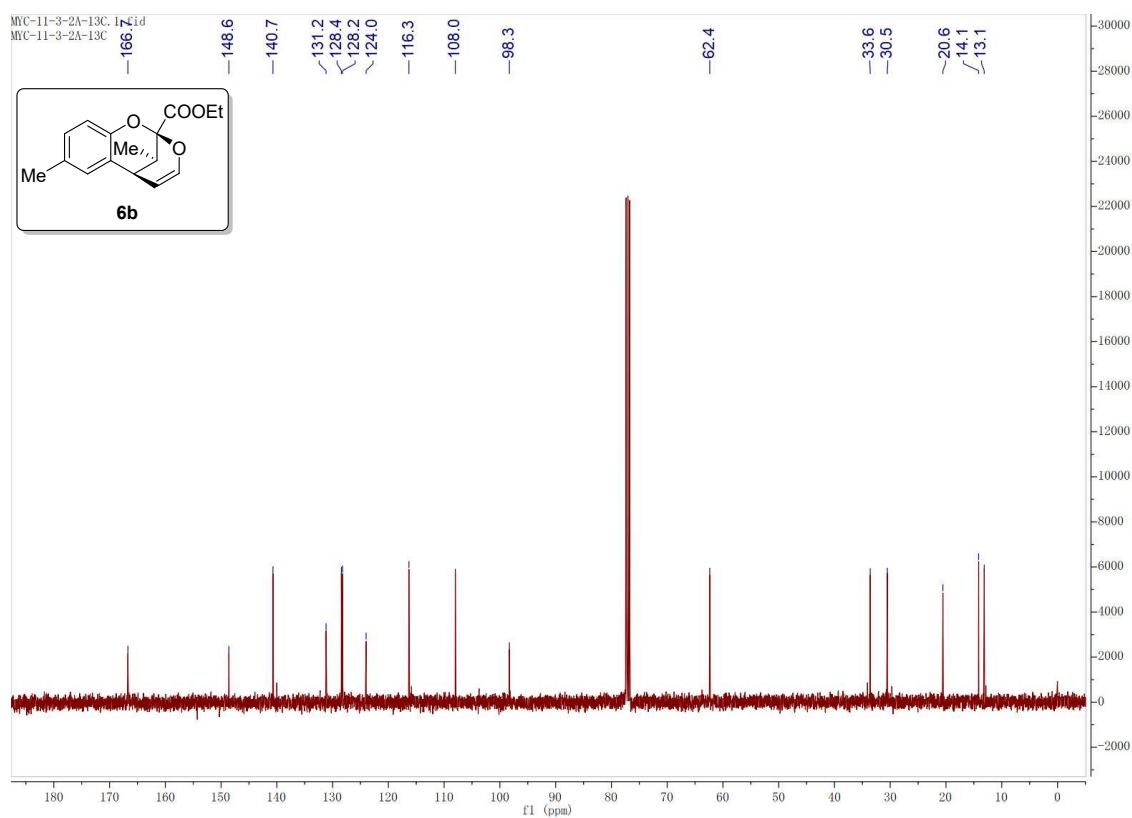

### The $^1\text{H}$ NMR spectrum of 6c (400 MHz, $\text{CDCl}_3$ )

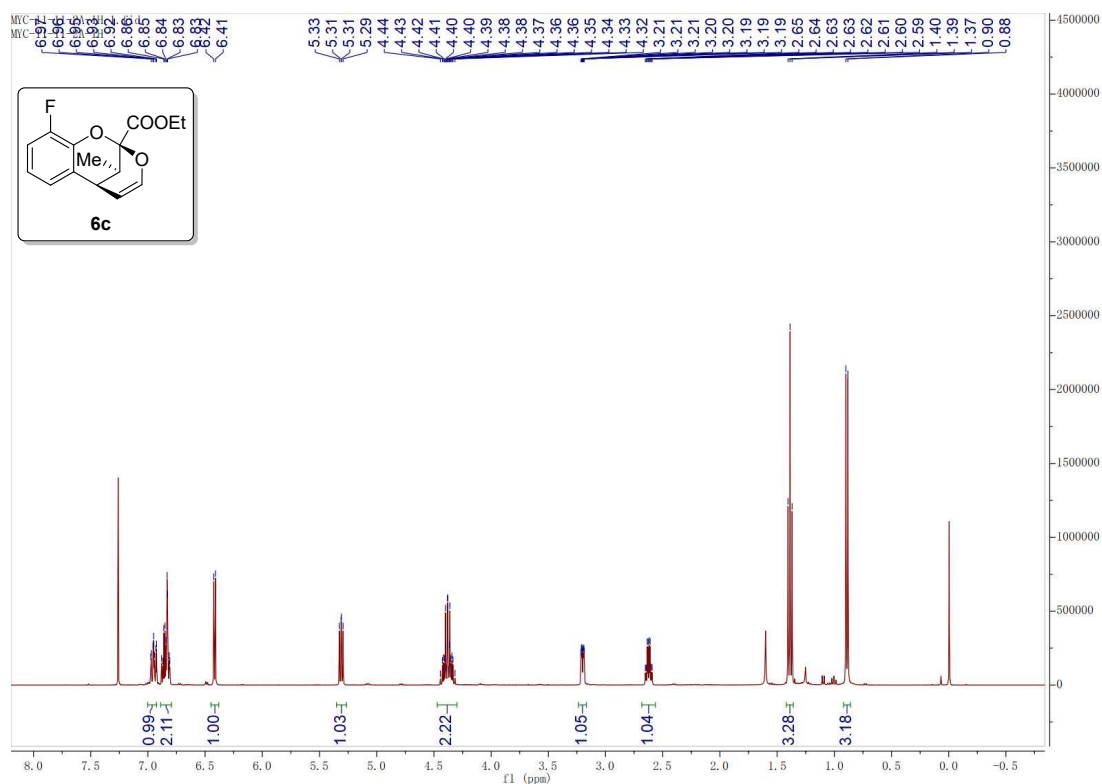

### The <sup>13</sup>C NMR spectrum of **6c** (100 MHz, CDCl<sub>3</sub>)

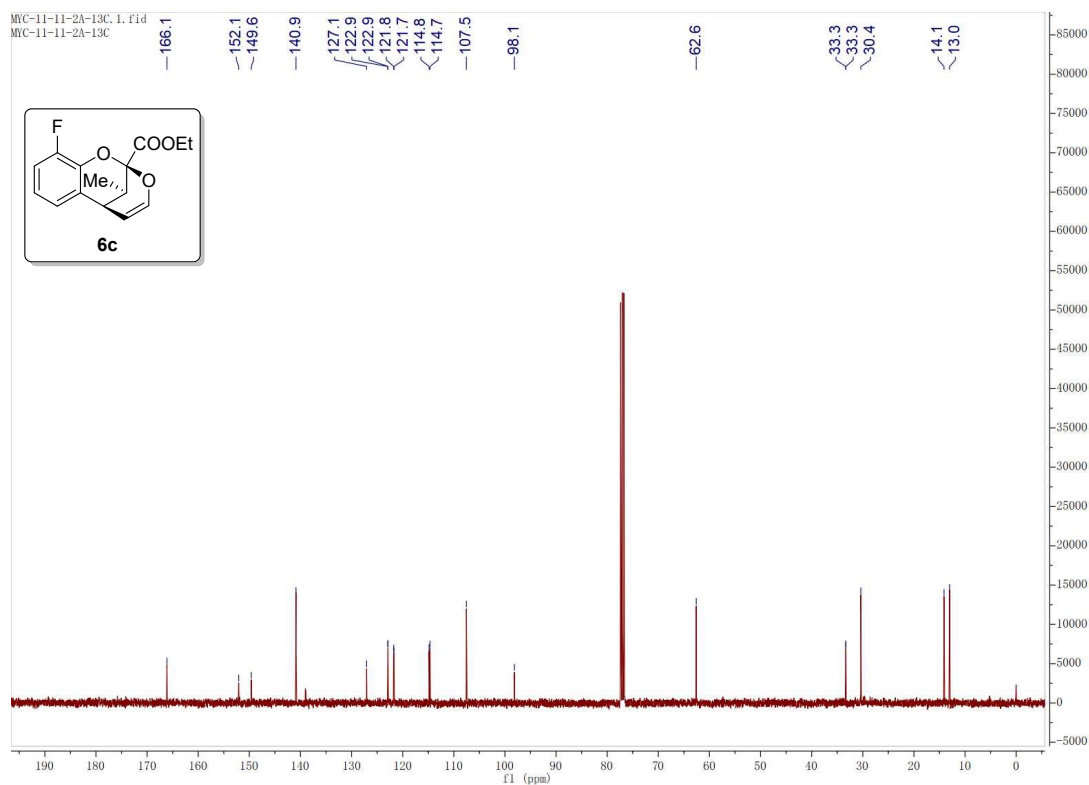

## The $^{19}\text{F}$ NMR spectrum of 6c (376 MHz, $\text{CDCl}_3$ )

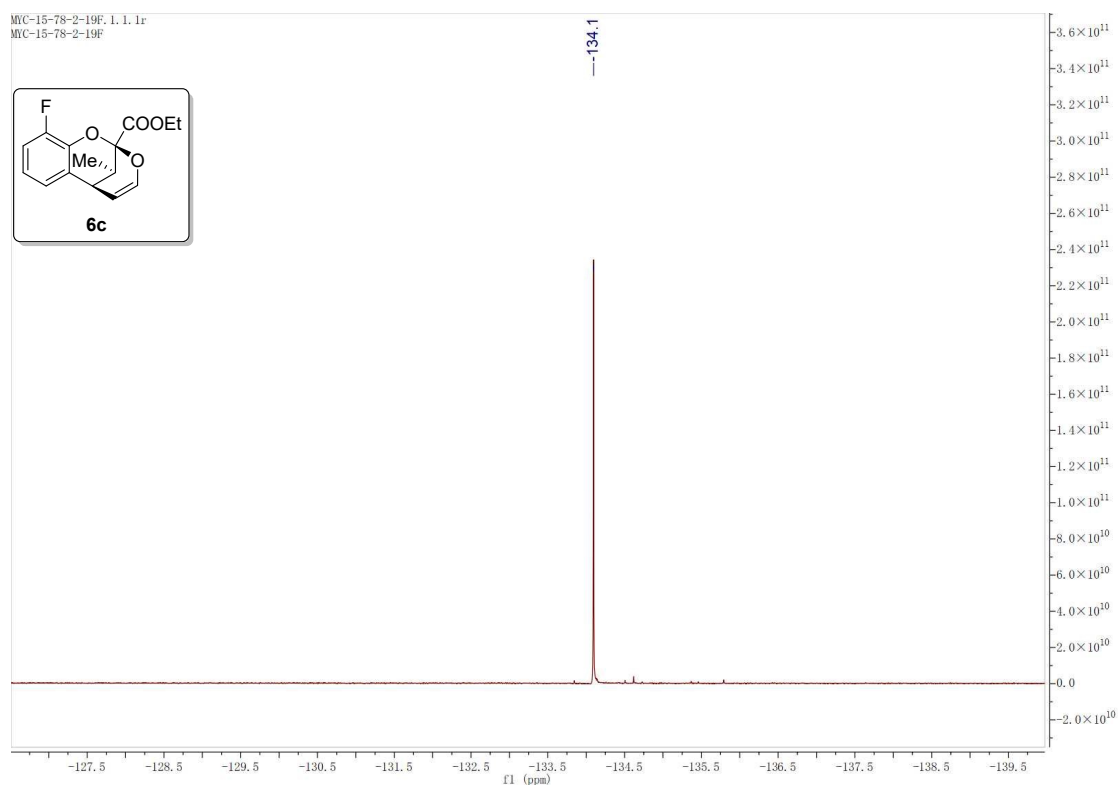

## The HPLC of racemic 6c

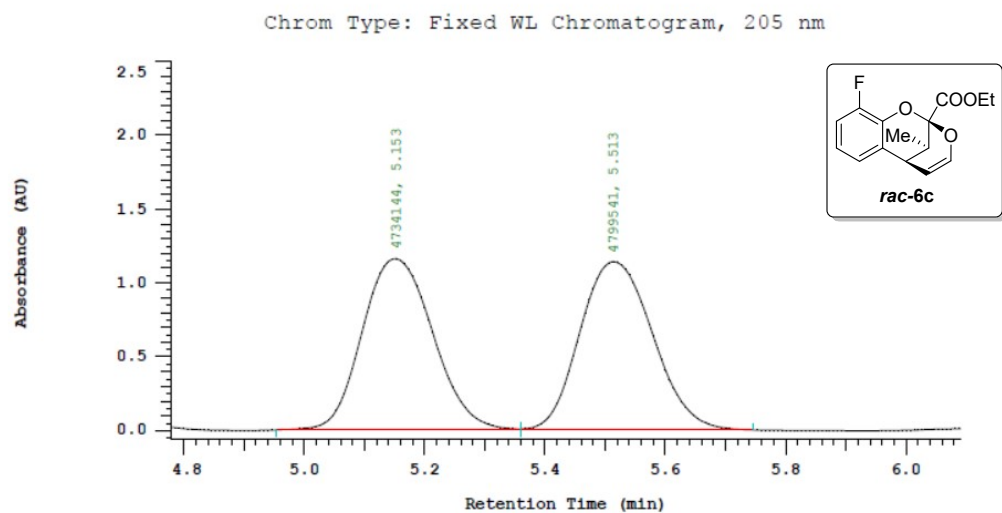

Chrom Type: Fixed WL Chromatogram, 205 nm  
Peak Quantitation: AREA  
Calculation Method: AREA%

| No. | RT    | Area    | Area %  | BC |
|-----|-------|---------|---------|----|
| 1   | 5.153 | 4734144 | 49.657  | BV |
| 2   | 5.513 | 4799541 | 50.343  | VB |
|     |       | 9533685 | 100.000 |    |

## The HPLC of chiral 6c

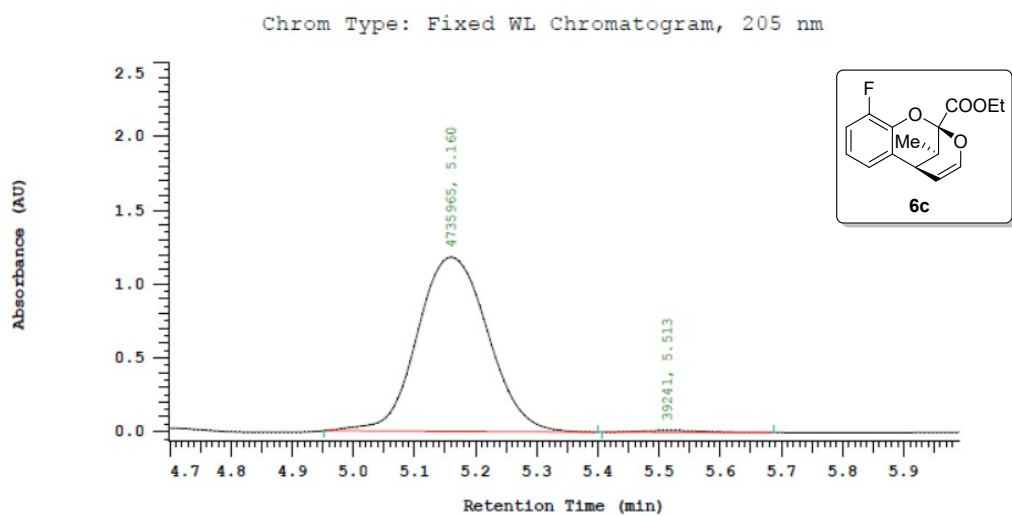

Chrom Type: Fixed WL Chromatogram, 205 nm

Peak Quantitation: AREA

Calculation Method: AREA%

| No. | RT    | Area    | Area %  | BC |
|-----|-------|---------|---------|----|
| 1   | 5.160 | 4735965 | 99.178  | BB |
| 2   | 5.513 | 39241   | 0.822   | BB |
|     |       | 4775206 | 100.000 |    |

### The $^1\text{H}$ NMR spectrum of 6d (400 MHz, $\text{CDCl}_3$ )

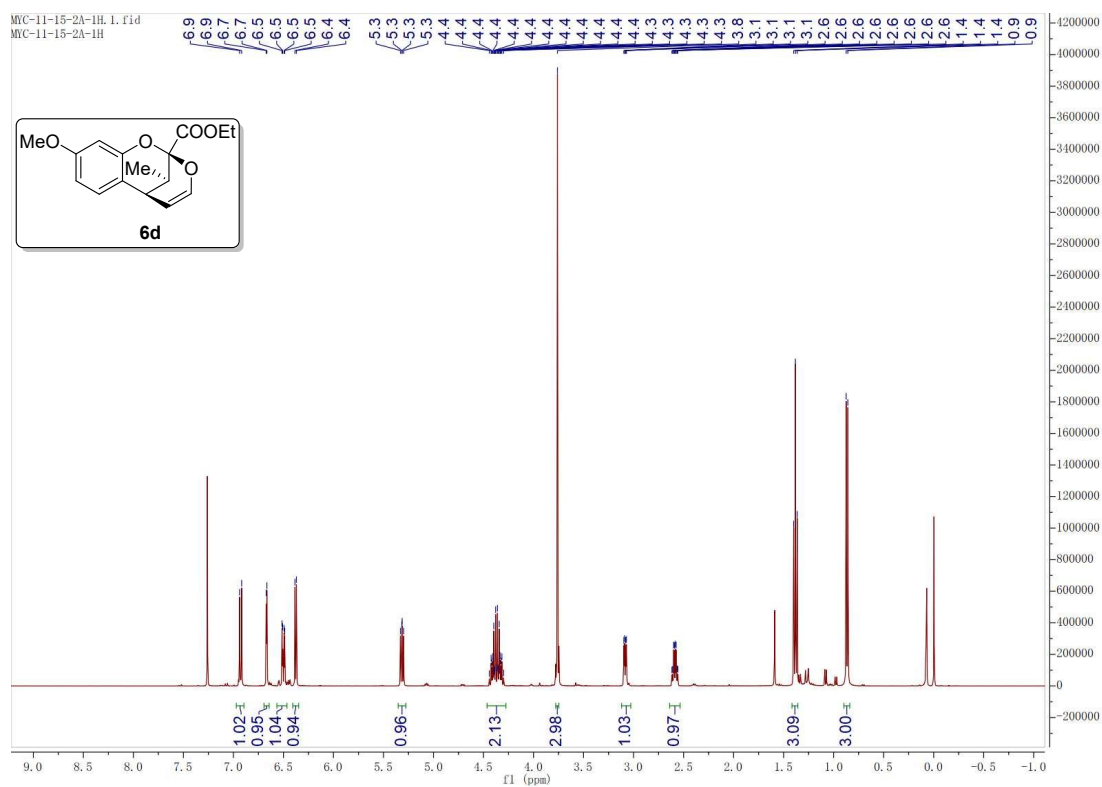

### The $^{13}\text{C}$ NMR spectrum of 6d (100 MHz, $\text{CDCl}_3$ )

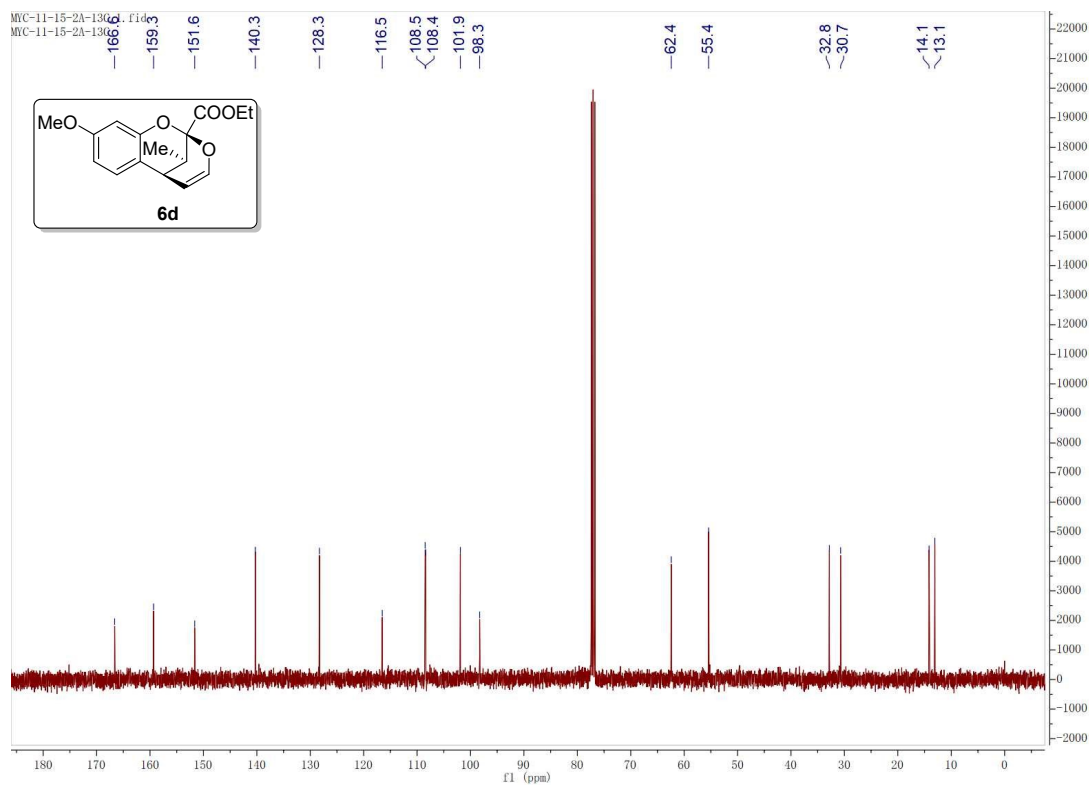

## The HPLC of racemic 6d

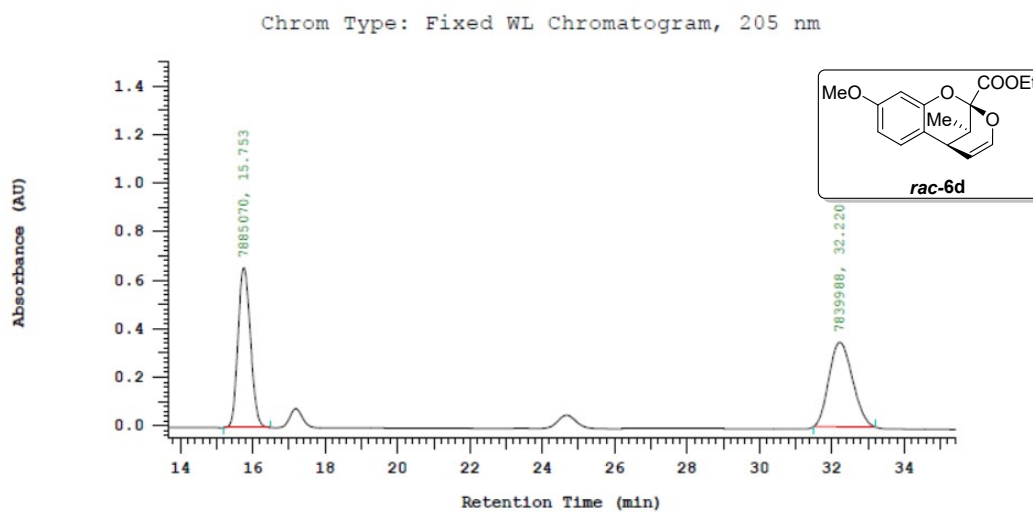

Chrom Type: Fixed WL Chromatogram, 205 nm  
Peak Quantitation: AREA  
Calculation Method: AREA%

| No. | RT     | Area     | Area %  | BC |
|-----|--------|----------|---------|----|
| 1   | 15.753 | 7885070  | 50.143  | BB |
| 2   | 32.220 | 7839988  | 49.857  | BB |
|     |        | 15725058 | 100.000 |    |

## The HPLC of chiral 6d

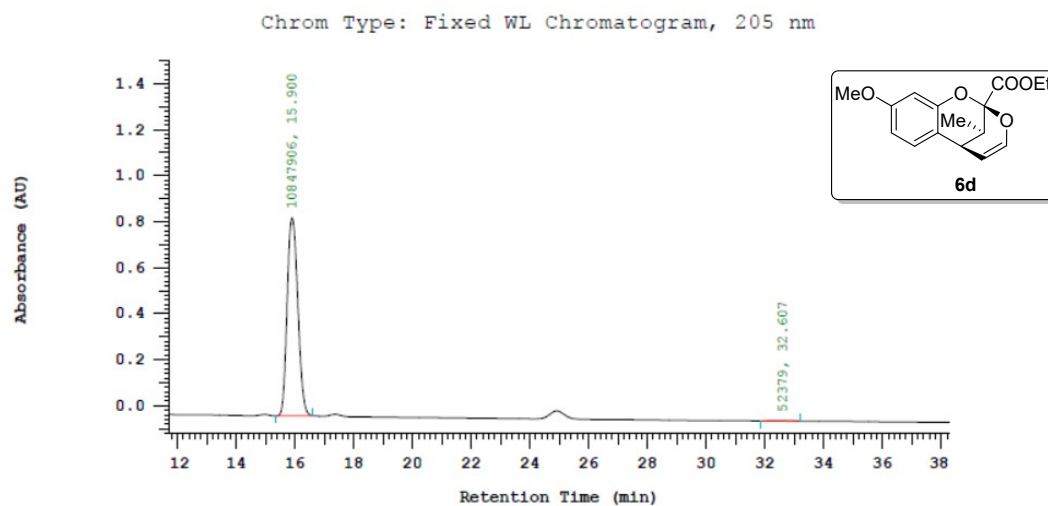

Chrom Type: Fixed WL Chromatogram, 205 nm  
Peak Quantitation: AREA  
Calculation Method: AREA%

| No. | RT     | Area     | Area %  | BC |
|-----|--------|----------|---------|----|
| 1   | 15.900 | 10847906 | 99.519  | BB |
| 2   | 32.607 | 52379    | 0.481   | BB |
|     |        | 10900285 | 100.000 |    |



### The $^1\text{H}$ NMR spectrum of 6e (400 MHz, $\text{CDCl}_3$ )

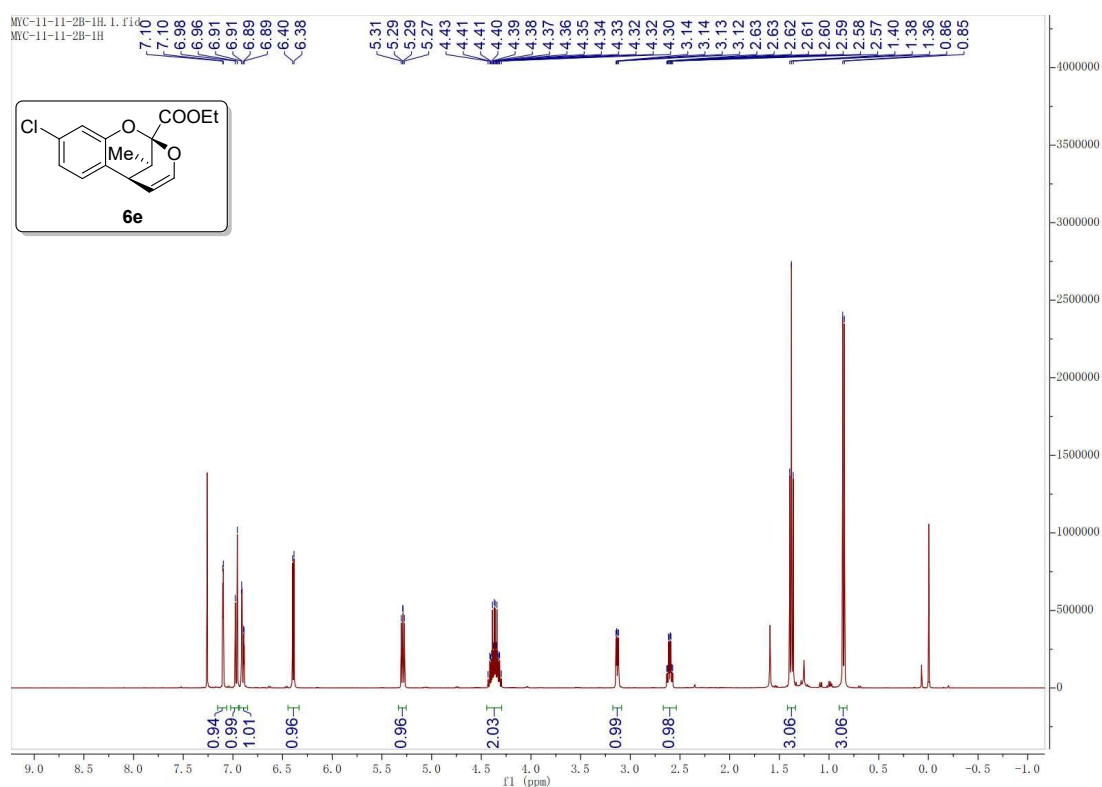

### The $^{13}\text{C}$ NMR spectrum of 6e (100 MHz, $\text{CDCl}_3$ )

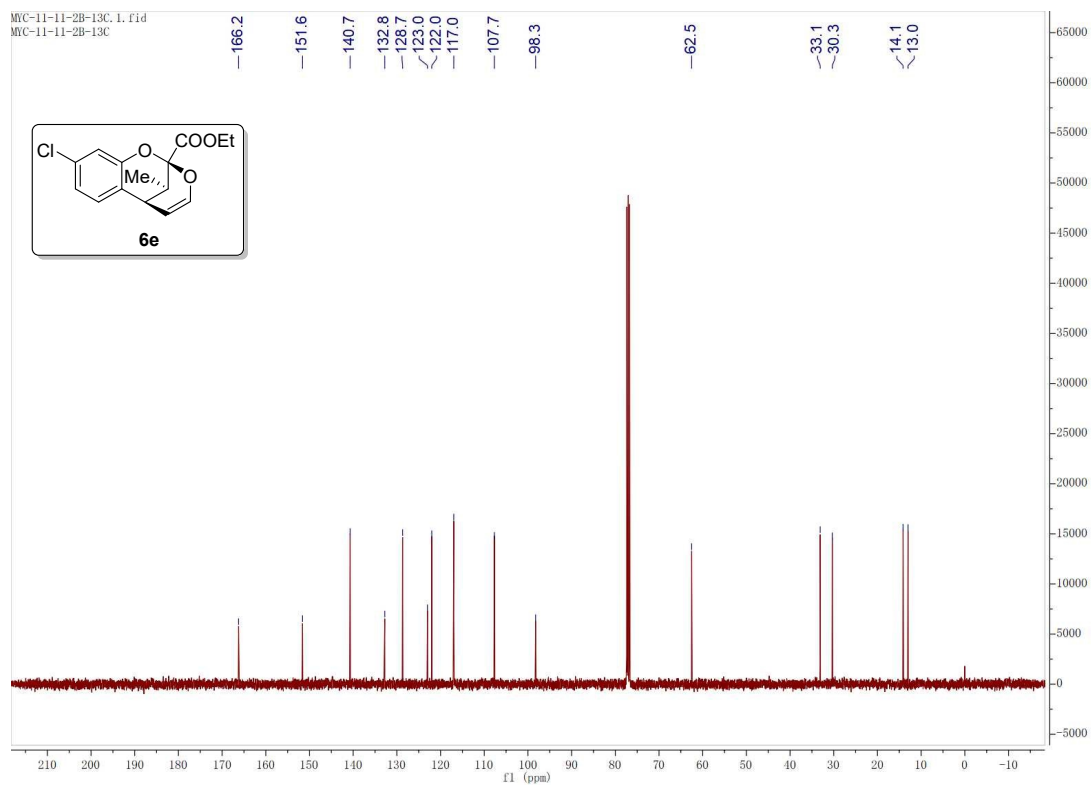

## The HPLC of racemic 6e

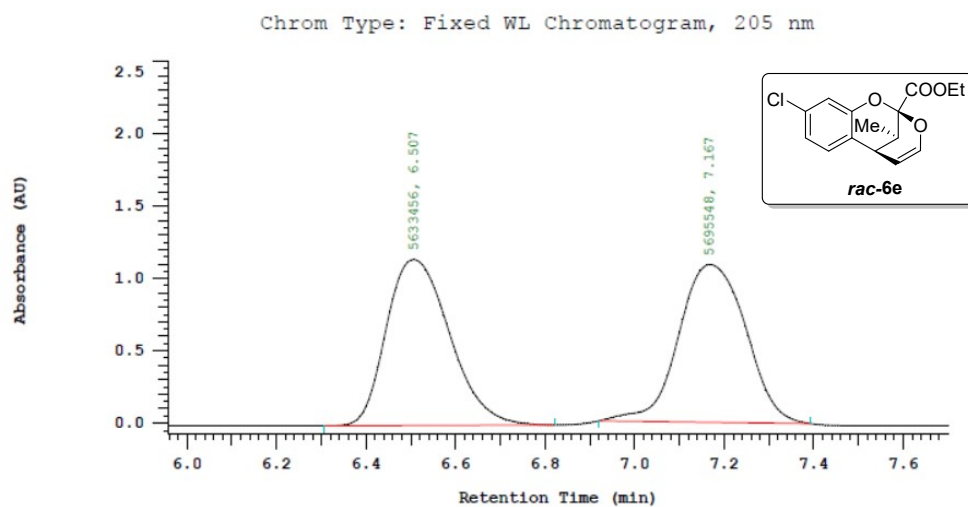

Chrom Type: Fixed WL Chromatogram, 205 nm  
Peak Quantitation: AREA  
Calculation Method: AREA%

| No. | RT    | Area     | Area %  | BC |
|-----|-------|----------|---------|----|
| 1   | 6.507 | 5633456  | 49.726  | BB |
| 2   | 7.167 | 5695548  | 50.274  | BB |
|     |       | 11329004 | 100.000 |    |

## The HPLC of chiral 6e

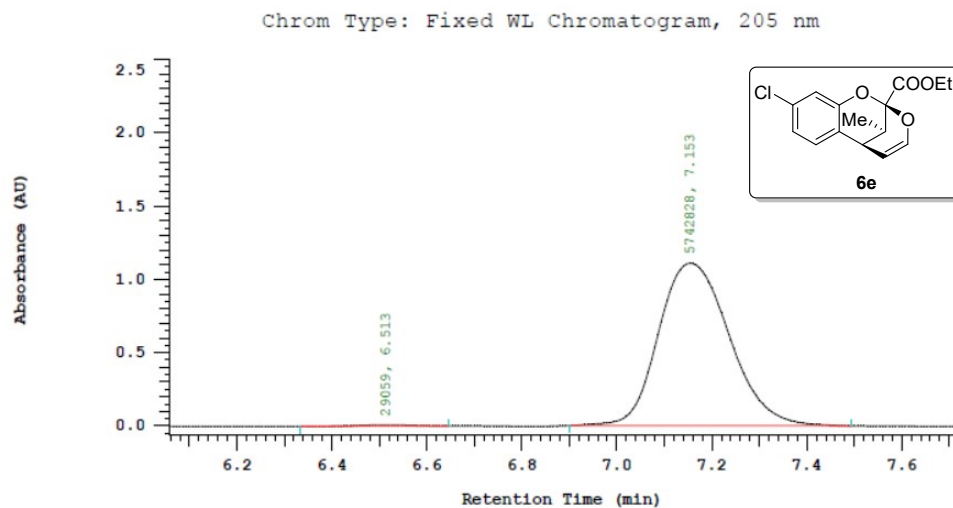

Chrom Type: Fixed WL Chromatogram, 205 nm  
Peak Quantitation: AREA  
Calculation Method: AREA%

| No. | RT    | Area    | Area %  | BC |
|-----|-------|---------|---------|----|
| 1   | 6.513 | 29059   | 0.503   | BB |
| 2   | 7.153 | 5742828 | 99.497  | BB |
|     |       | 5771887 | 100.000 |    |

CCOC(=O)c1ccc2c(c1)OC(C2)C(=O)OCC  
**6f**

1H NMR spectrum (CDCl<sub>3</sub>) of compound **6f**. The spectrum displays peaks corresponding to the structure, with integrations and chemical shift labels provided.

| Chemical Shift (ppm) | Integration |
|----------------------|-------------|
| 7.8                  | 1.00        |
| 7.78                 | 0.99        |
| 7.7                  | 1.03        |
| 7.0                  | 0.95        |
| 5.3                  | 0.98        |
| 4.3                  | 2.07        |
| 3.9                  | 2.99        |
| 3.1                  | 1.00        |
| 2.5                  | 0.99        |
| 1.3                  | 3.20        |
| 0.8                  | 3.06        |

<sup>13</sup>C NMR spectrum of compound **6f** (MWC-11-15-2C-13C, 1, 1, F<sub>2</sub>, MWC-11-15-2C-13C). The spectrum shows peaks at 166.6, 166.1, 155.0, 140.6, 129.9, 129.7, 124.5, 123.8, 116.5, 107.7, 98.5, 62.6, 52.0, 33.4, 30.3, 14.1, and 13.0 ppm. The chemical structure of **6f** is shown in the inset.

## The HPLC of racemic 6f

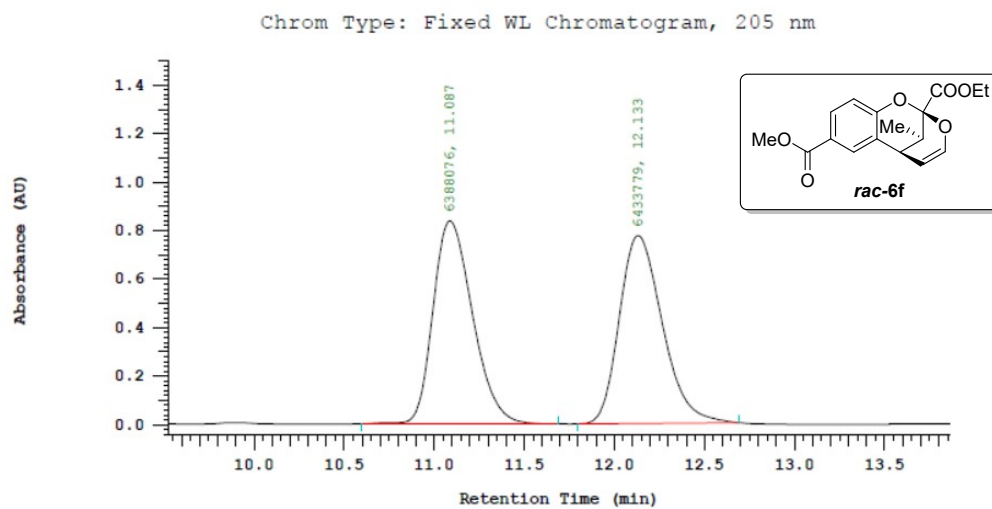

Chrom Type: Fixed WL Chromatogram, 205 nm  
Peak Quantitation: AREA  
Calculation Method: AREA%

| No. | RT     | Area     | Area %  | BC |
|-----|--------|----------|---------|----|
| 1   | 11.087 | 6388076  | 49.822  | BB |
| 2   | 12.133 | 6433779  | 50.178  | BB |
|     |        | 12821855 | 100.000 |    |

## The HPLC of chiral 6f

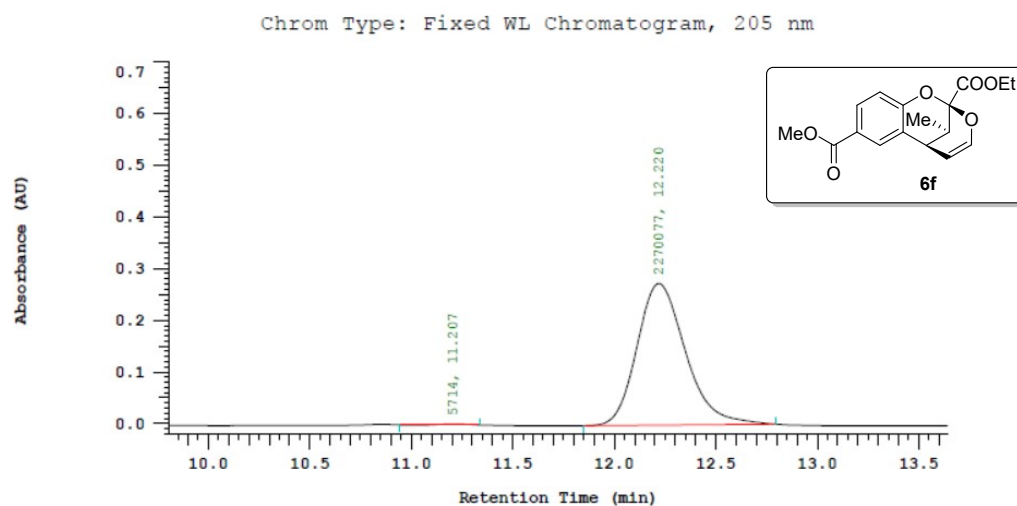

Chrom Type: Fixed WL Chromatogram, 205 nm  
Peak Quantitation: AREA  
Calculation Method: AREA%

| No. | RT     | Area    | Area %  | BC |
|-----|--------|---------|---------|----|
| 1   | 11.207 | 5714    | 0.251   | BB |
| 2   | 12.220 | 2270077 | 99.749  | BB |
|     |        | 2275791 | 100.000 |    |

### The $^1\text{H}$ NMR spectrum of **6g** (400 MHz, $\text{CDCl}_3$ )

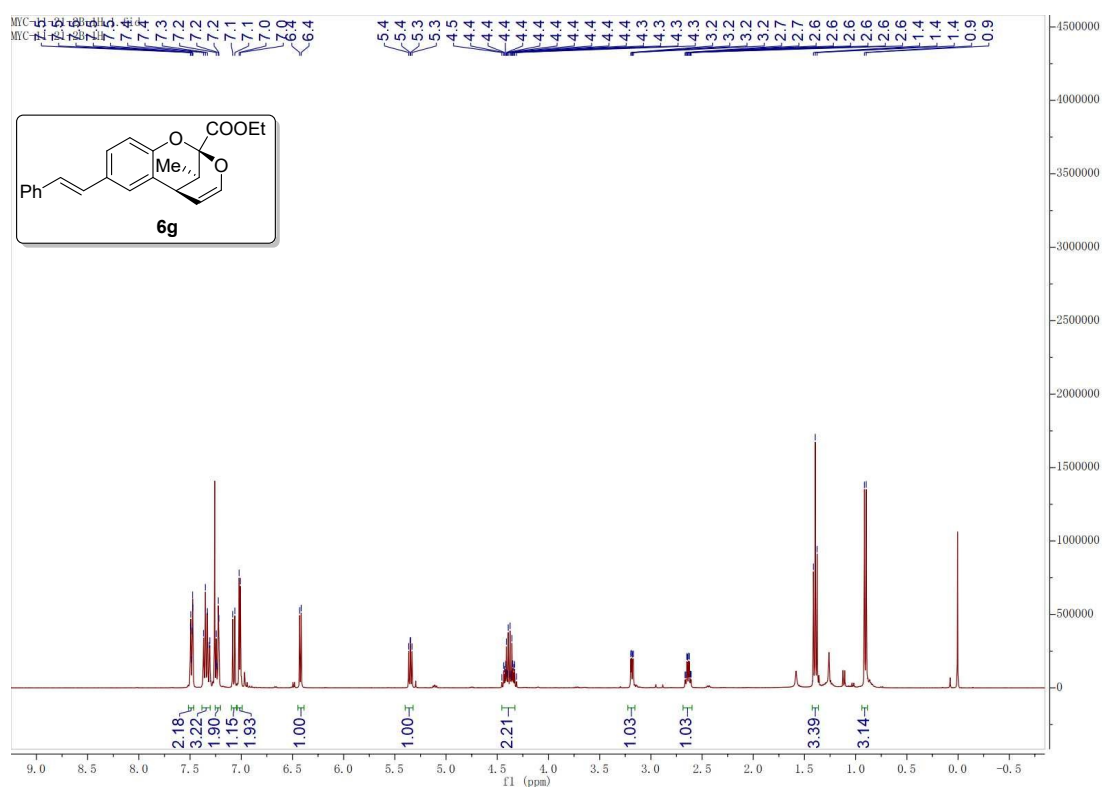

### The $^{13}\text{C}$ NMR spectrum of **6g** (100 MHz, $\text{CDCl}_3$ )

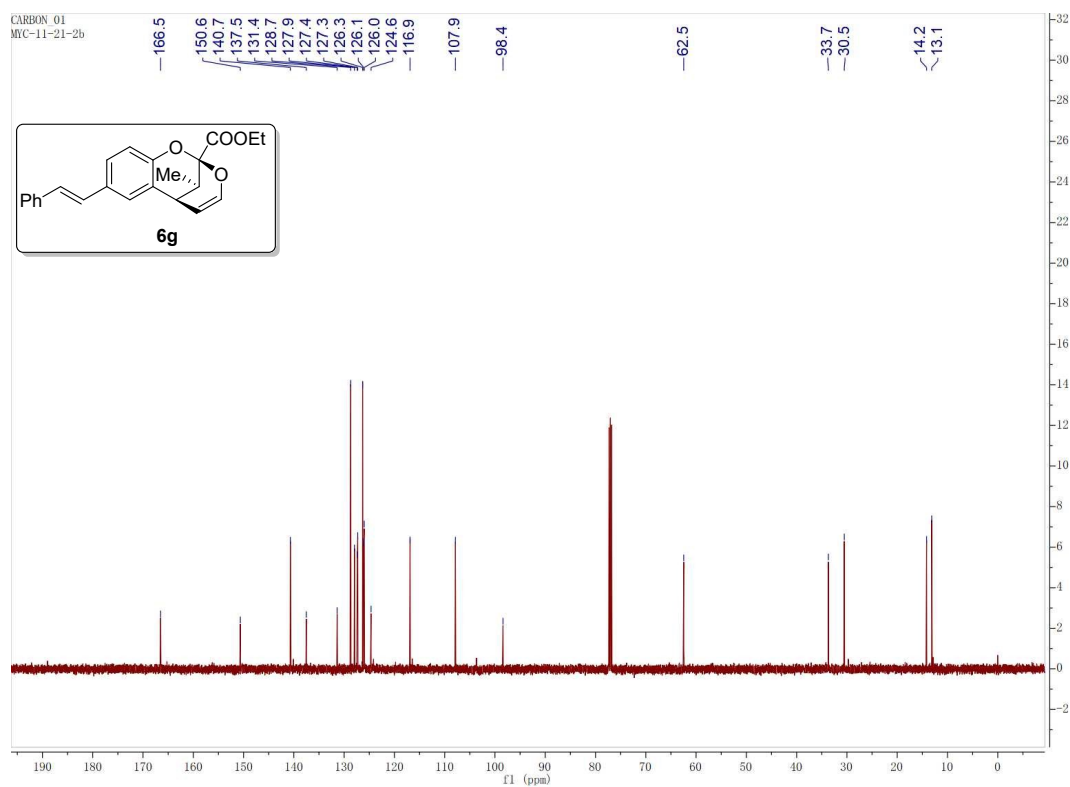

## The HPLC of racemic 6g

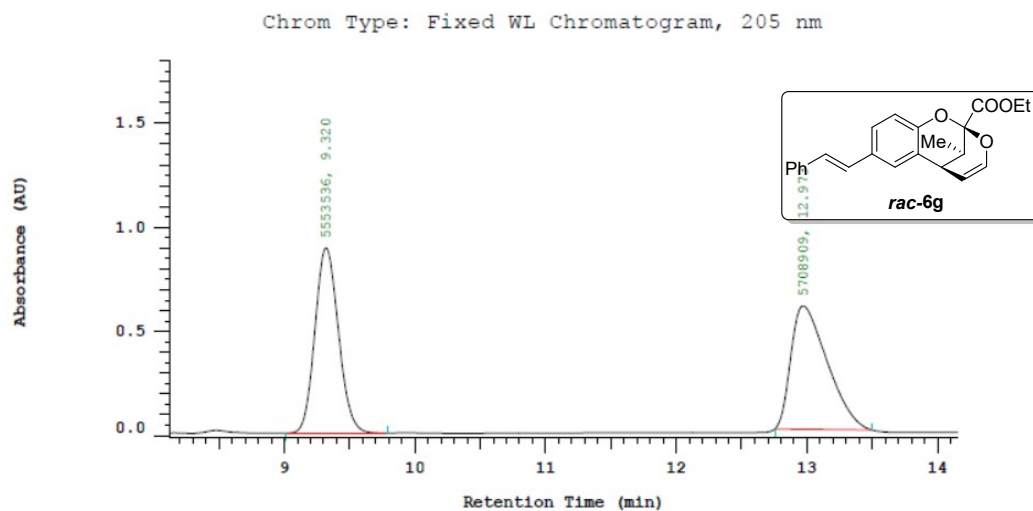

Chrom Type: Fixed WL Chromatogram, 205 nm  
 Peak Quantitation: AREA  
 Calculation Method: AREA%

| No. | RT     | Area     | Area %  | BC |
|-----|--------|----------|---------|----|
| 1   | 9.320  | 5553536  | 49.310  | BB |
| 2   | 12.973 | 5708909  | 50.690  | BB |
|     |        | 11262445 | 100.000 |    |

## The HPLC of chiral 6g

Chrom Type: Fixed WL Chromatogram, 205 nm

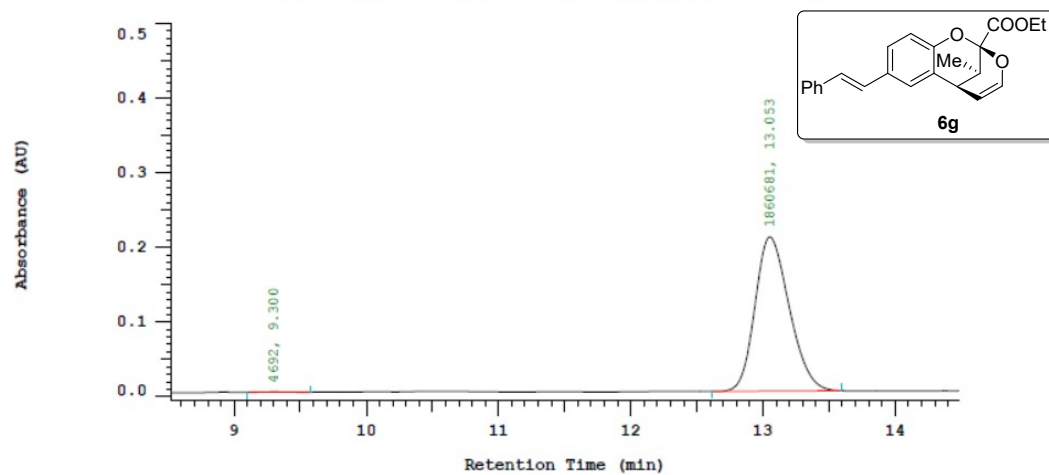

Chrom Type: Fixed WL Chromatogram, 205 nm

Peak Quantitation: AREA  
Calculation Method: AREA%

| No. | RT     | Area    | Area %  | BC |
|-----|--------|---------|---------|----|
| 1   | 9.300  | 4692    | 0.252   | BB |
| 2   | 13.053 | 1860681 | 99.748  | BB |
|     |        | 1865373 | 100.000 |    |

# The $^1\text{H}$ NMR spectrum of 6h (400 MHz, $\text{CDCl}_3$ )

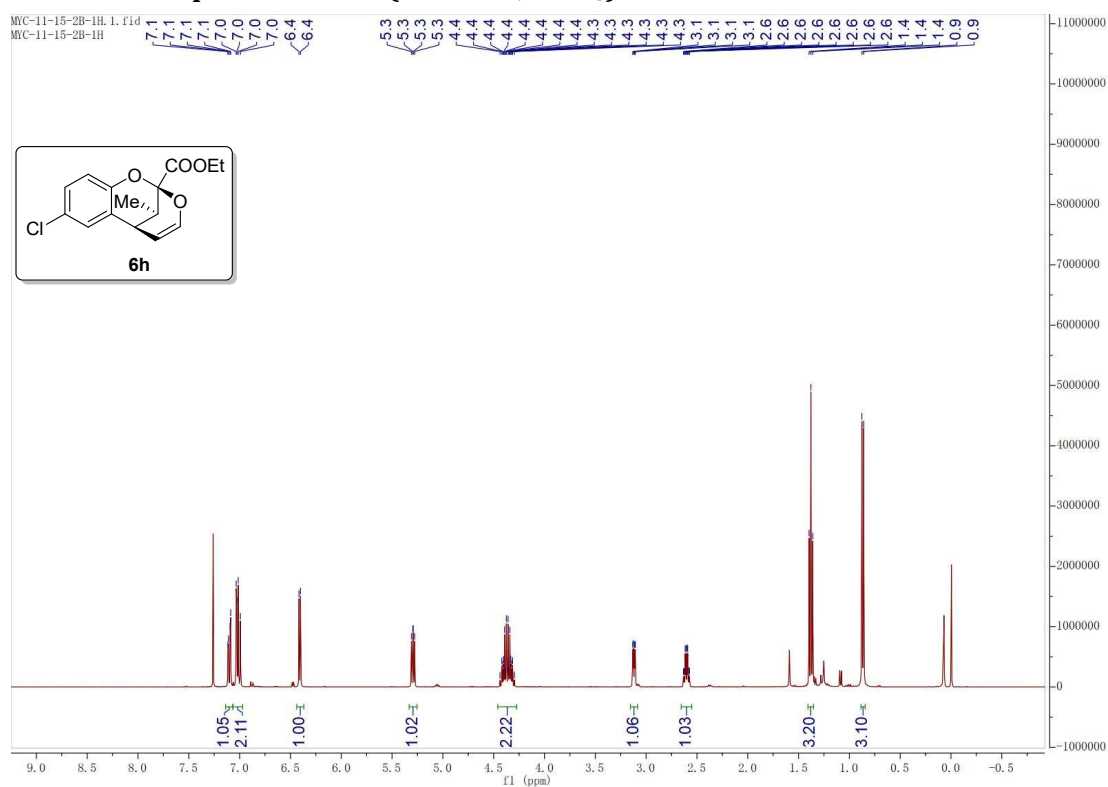

# The $^{13}\text{C}$ NMR spectrum of 6h (100 MHz, $\text{CDCl}_3$ )

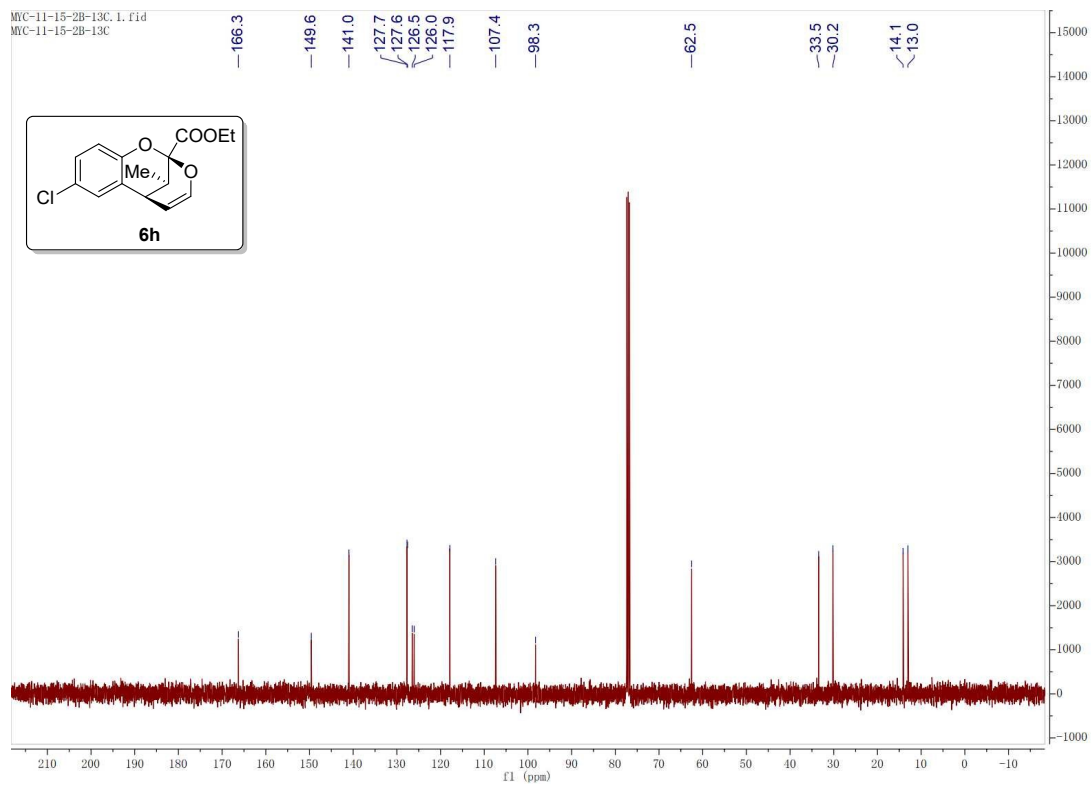



## The HPLC of racemic 6h

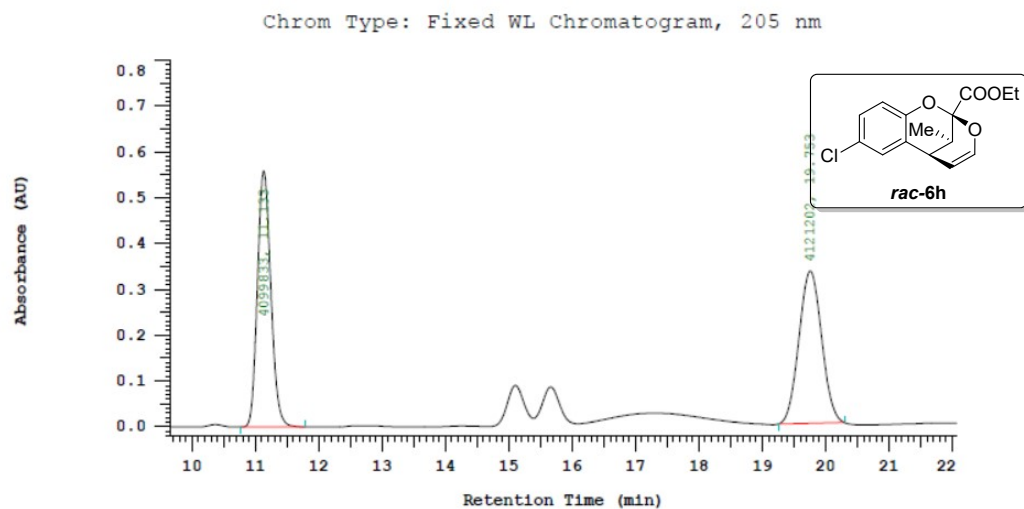

Chrom Type: Fixed WL Chromatogram, 205 nm  
Peak Quantitation: AREA  
Calculation Method: AREA%

| No. | RT     | Area    | Area %  | BC |
|-----|--------|---------|---------|----|
| 1   | 11.133 | 4099833 | 49.870  | BB |
| 2   | 19.753 | 4121202 | 50.130  | BB |
|     |        | 8221035 | 100.000 |    |

## The HPLC of chiral 6h

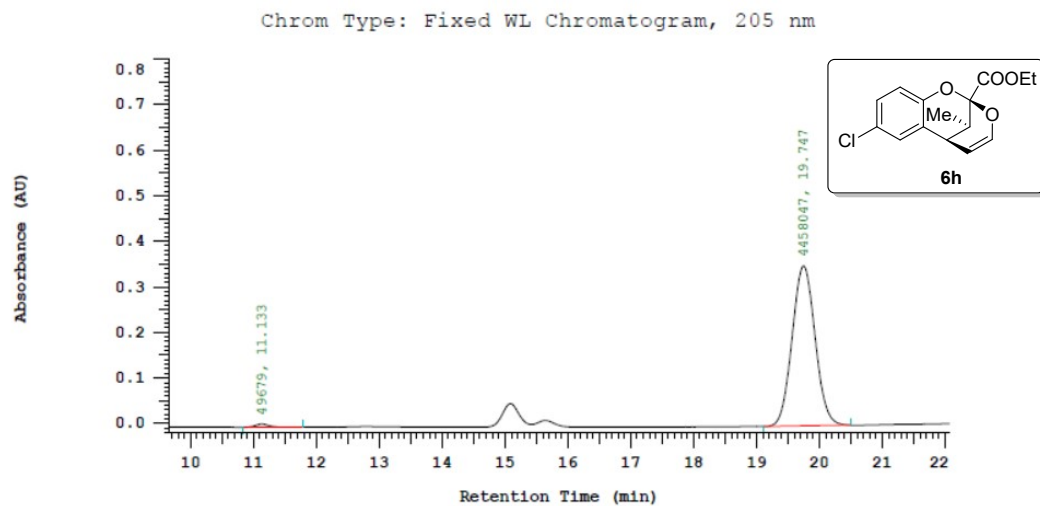

Chrom Type: Fixed WL Chromatogram, 205 nm  
Peak Quantitation: AREA  
Calculation Method: AREA%

| No. | RT     | Area    | Area %  | BC |
|-----|--------|---------|---------|----|
| 1   | 11.133 | 49679   | 1.102   | BB |
| 2   | 19.747 | 4458047 | 98.898  | BB |
|     |        | 4507726 | 100.000 |    |

### The $^1\text{H}$ NMR spectrum of **6i** (400 MHz, $\text{CDCl}_3$ )

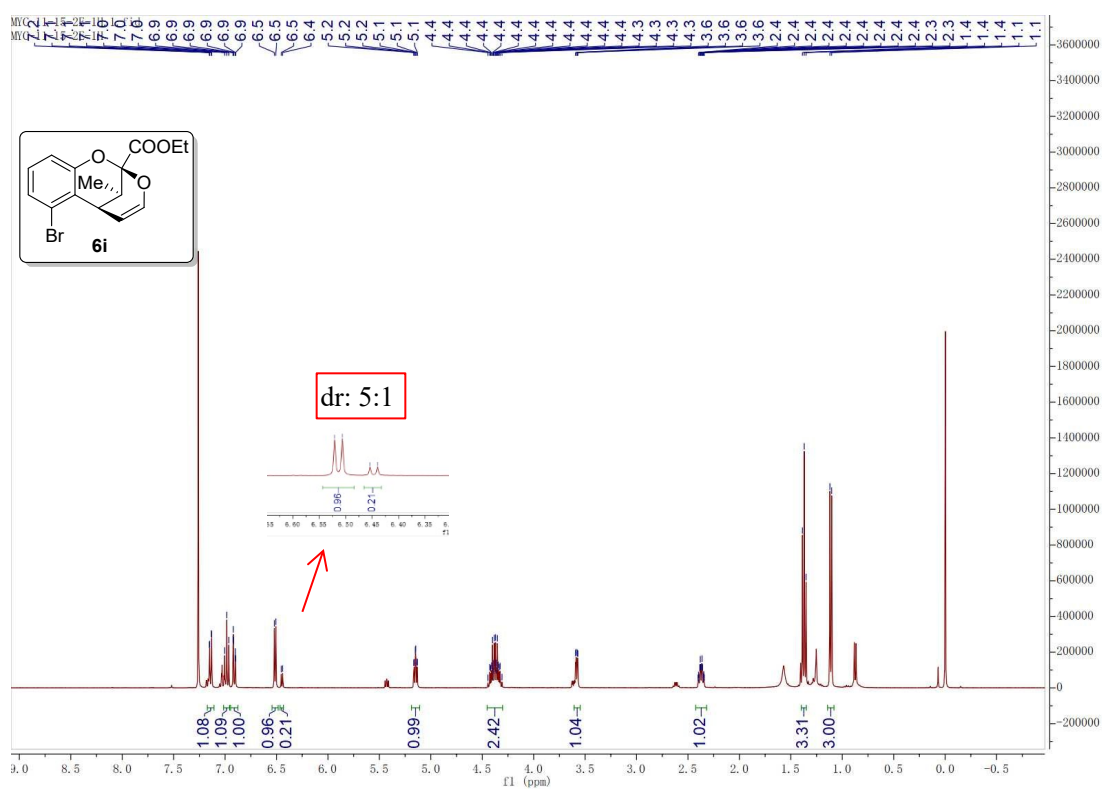

### The $^{13}\text{C}$ NMR spectrum of **6i** (100 MHz, $\text{CDCl}_3$ )

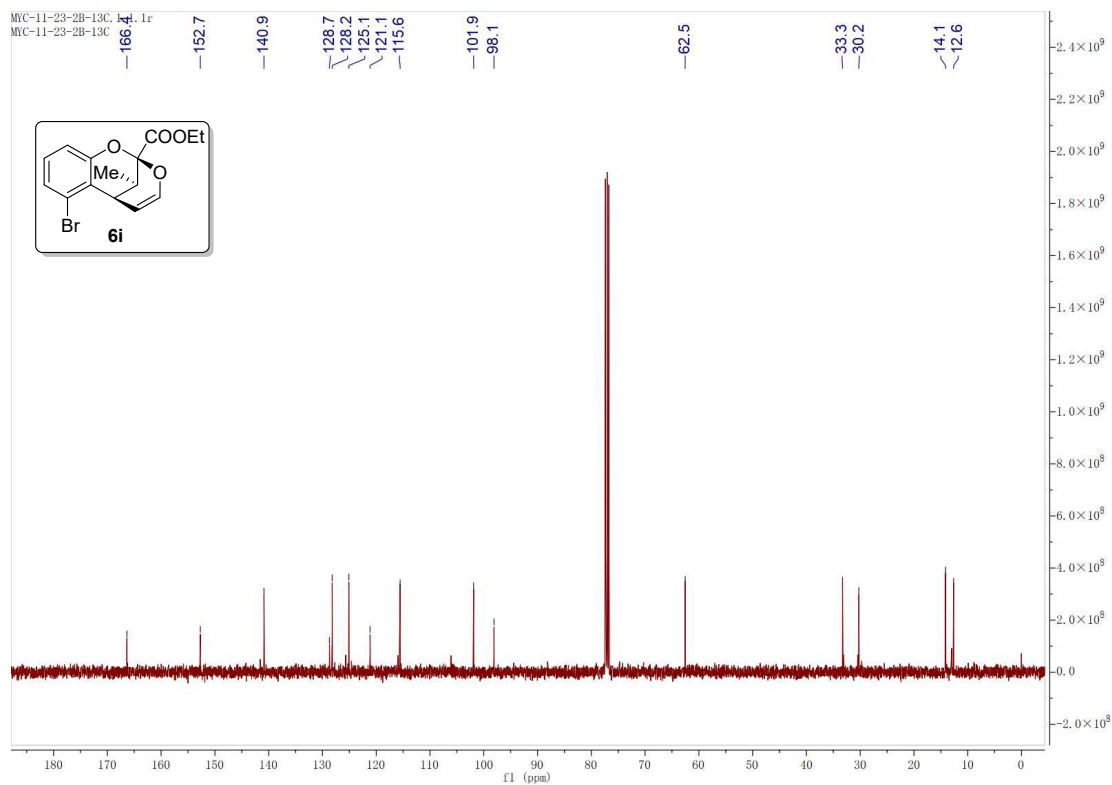

### The $^1\text{H}$ NMR spectrum of 6j (400 MHz, $\text{CDCl}_3$ )

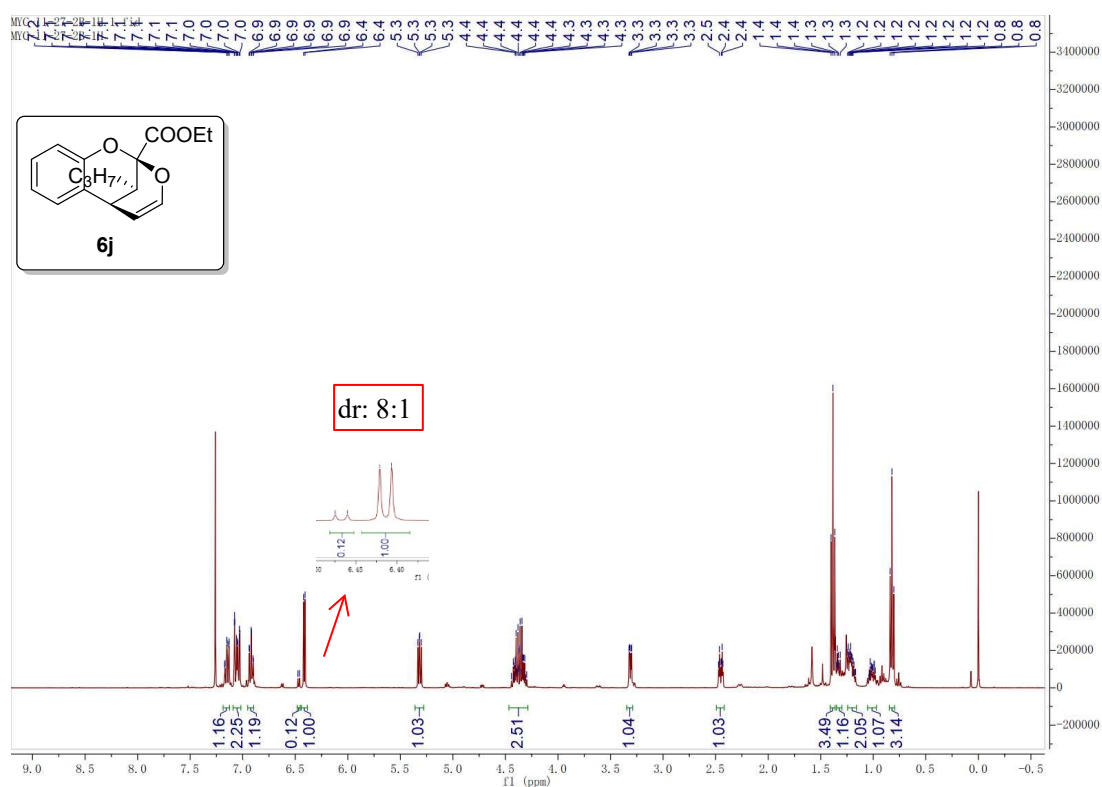

### The $^{13}\text{C}$ NMR spectrum of 6j (100 MHz, $\text{CDCl}_3$ )

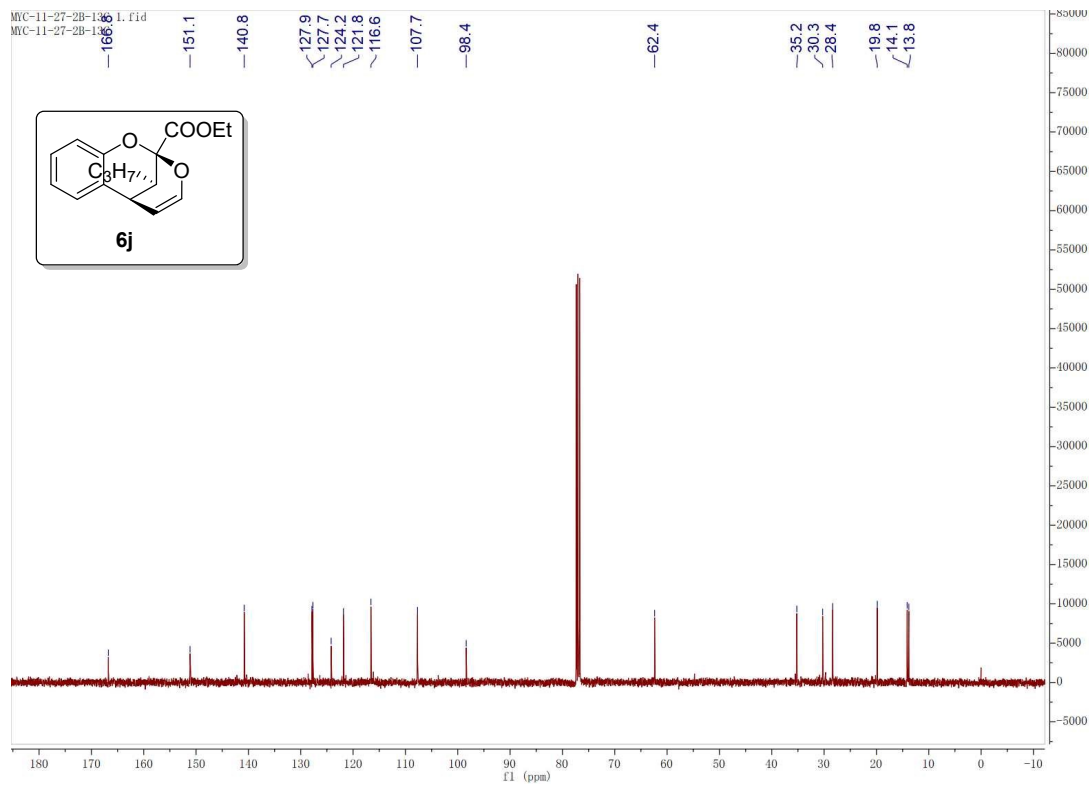

## The HPLC of racemic 6j

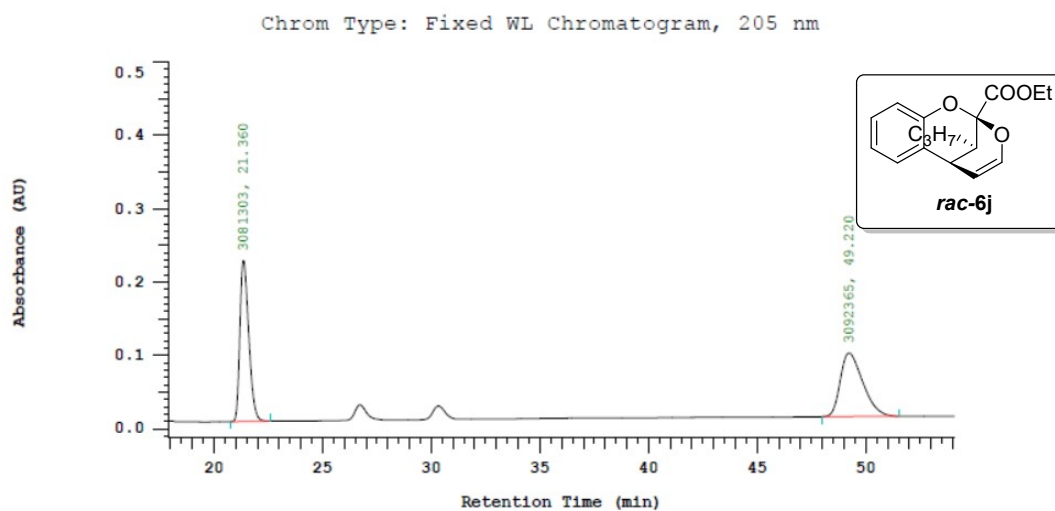

Chrom Type: Fixed WL Chromatogram, 205 nm  
 Peak Quantitation: AREA  
 Calculation Method: AREA%

| No. | RT     | Area    | Area %  | BC |
|-----|--------|---------|---------|----|
| 1   | 21.360 | 3081303 | 49.910  | BB |
| 2   | 49.220 | 3092365 | 50.090  | BB |
|     |        | 6173668 | 100.000 |    |

## The HPLC of chiral 6j

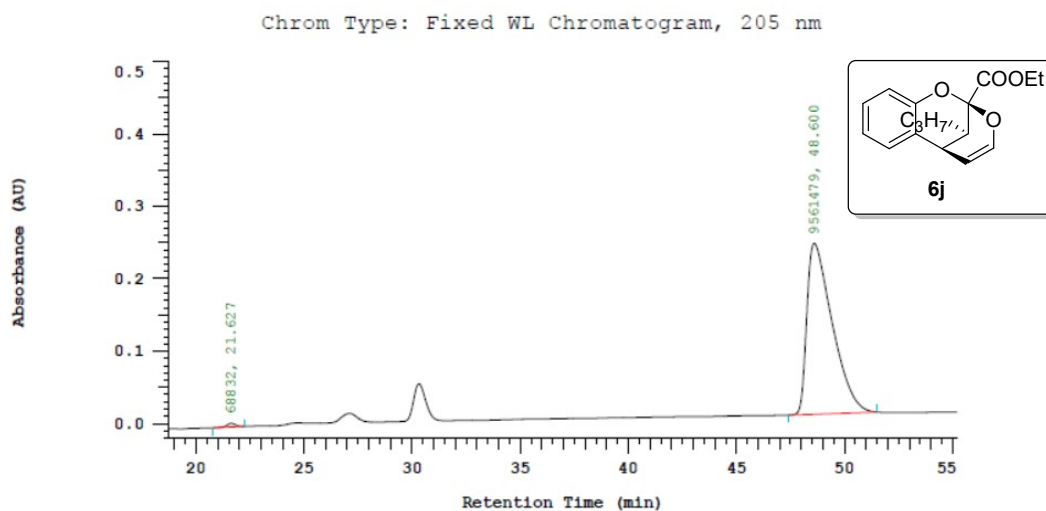

Chrom Type: Fixed WL Chromatogram, 205 nm  
 Peak Quantitation: AREA  
 Calculation Method: AREA%

| No. | RT     | Area    | Area %  | BC |
|-----|--------|---------|---------|----|
| 1   | 21.627 | 68832   | 0.715   | BB |
| 2   | 48.600 | 9561479 | 99.285  | BB |
|     |        | 9630311 | 100.000 |    |

### The $^1\text{H}$ NMR spectrum of 6k (400 MHz, $\text{CDCl}_3$ )

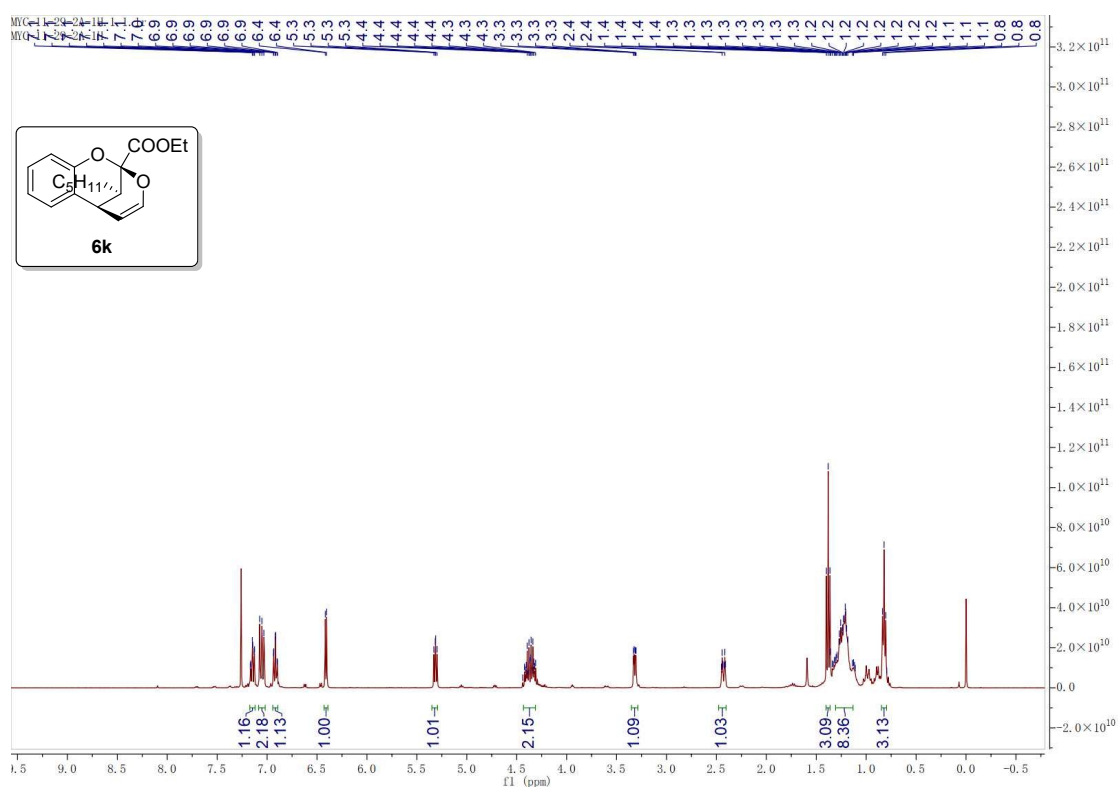

### The $^{13}\text{C}$ NMR spectrum of 6k (150 MHz, $\text{CDCl}_3$ )

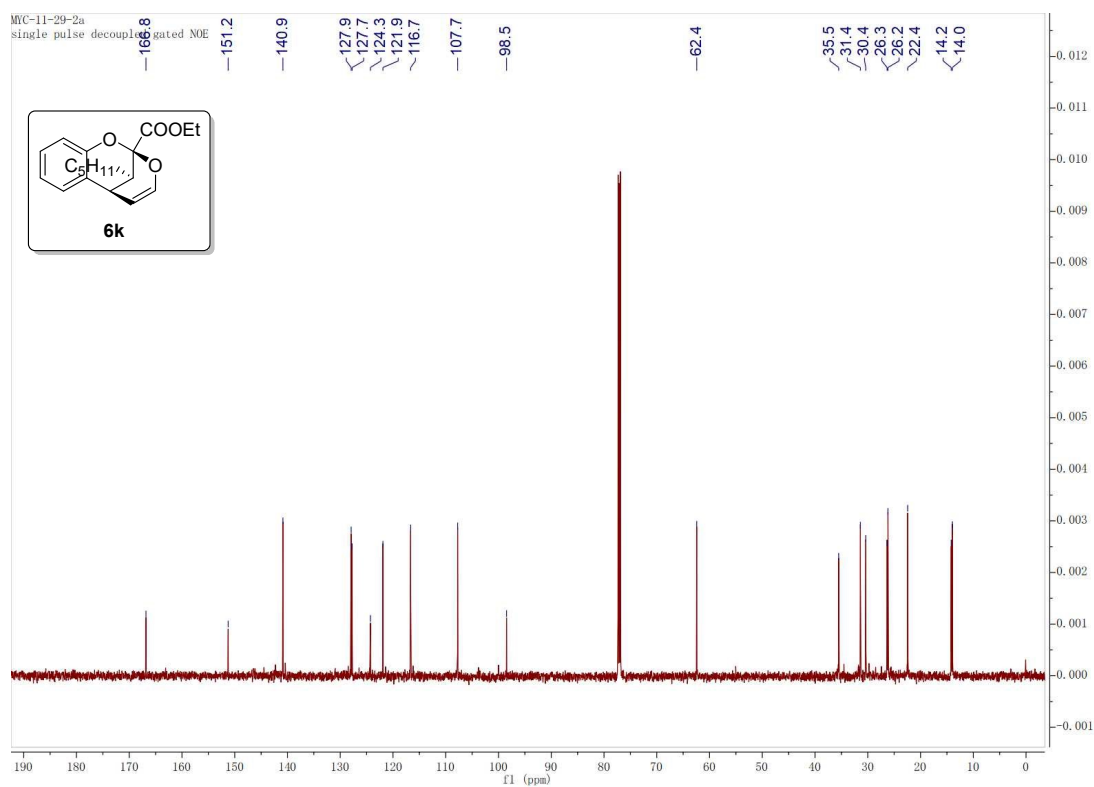

## The HPLC of racemic 6k

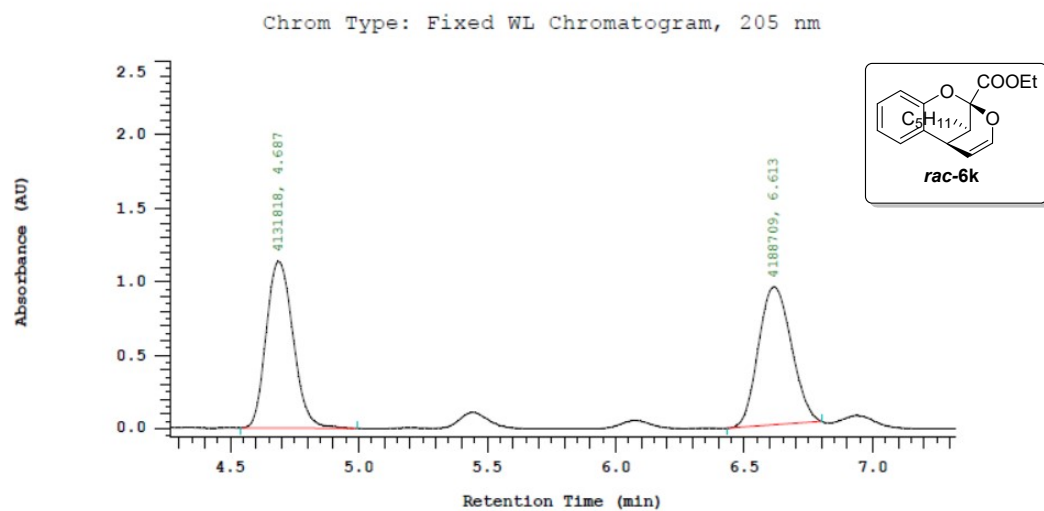

Chrom Type: Fixed WL Chromatogram, 205 nm

Peak Quantitation: AREA  
Calculation Method: AREA%

| No. | RT    | Area    | Area %  | BC |
|-----|-------|---------|---------|----|
| 1   | 4.687 | 4131818 | 49.658  | BB |
| 2   | 6.613 | 4188709 | 50.342  | BB |
|     |       | 8320527 | 100.000 |    |

## The HPLC of chiral 6k

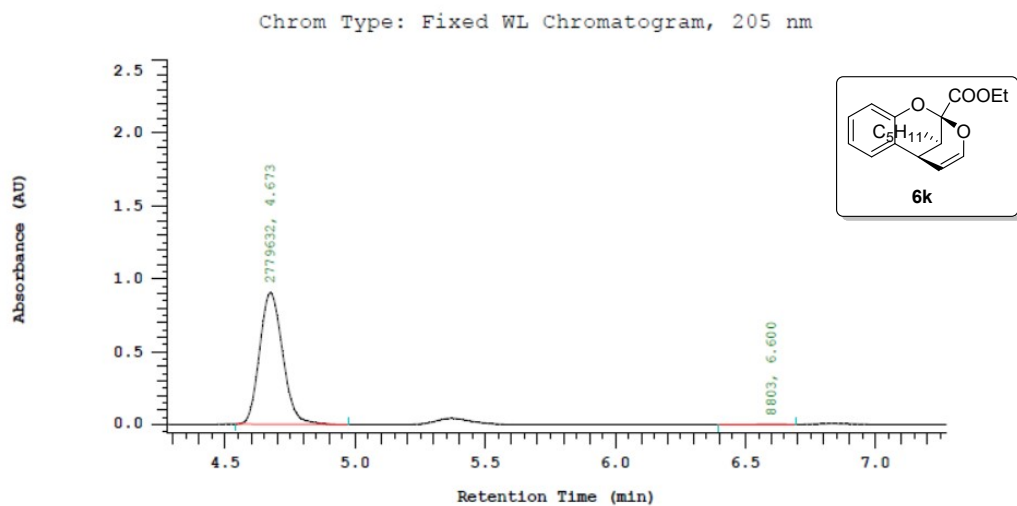

Chrom Type: Fixed WL Chromatogram, 205 nm

Peak Quantitation: AREA  
Calculation Method: AREA%

| No. | RT    | Area    | Area %  | BC |
|-----|-------|---------|---------|----|
| 1   | 4.673 | 2779632 | 99.684  | BB |
| 2   | 6.600 | 8803    | 0.316   | BB |
|     |       | 2788435 | 100.000 |    |

### The $^1\text{H}$ NMR spectrum of 6l (400 MHz, $\text{CDCl}_3$ )

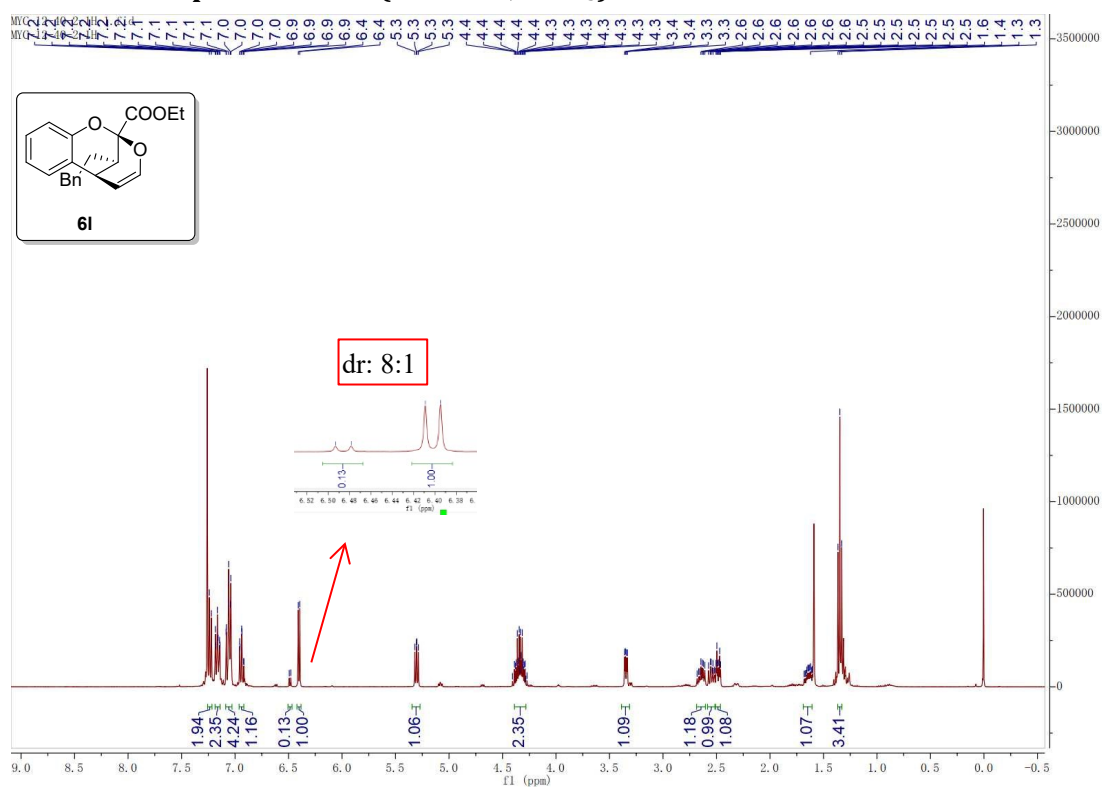

### The $^{13}\text{C}$ NMR spectrum of 6l (100 MHz, $\text{CDCl}_3$ )

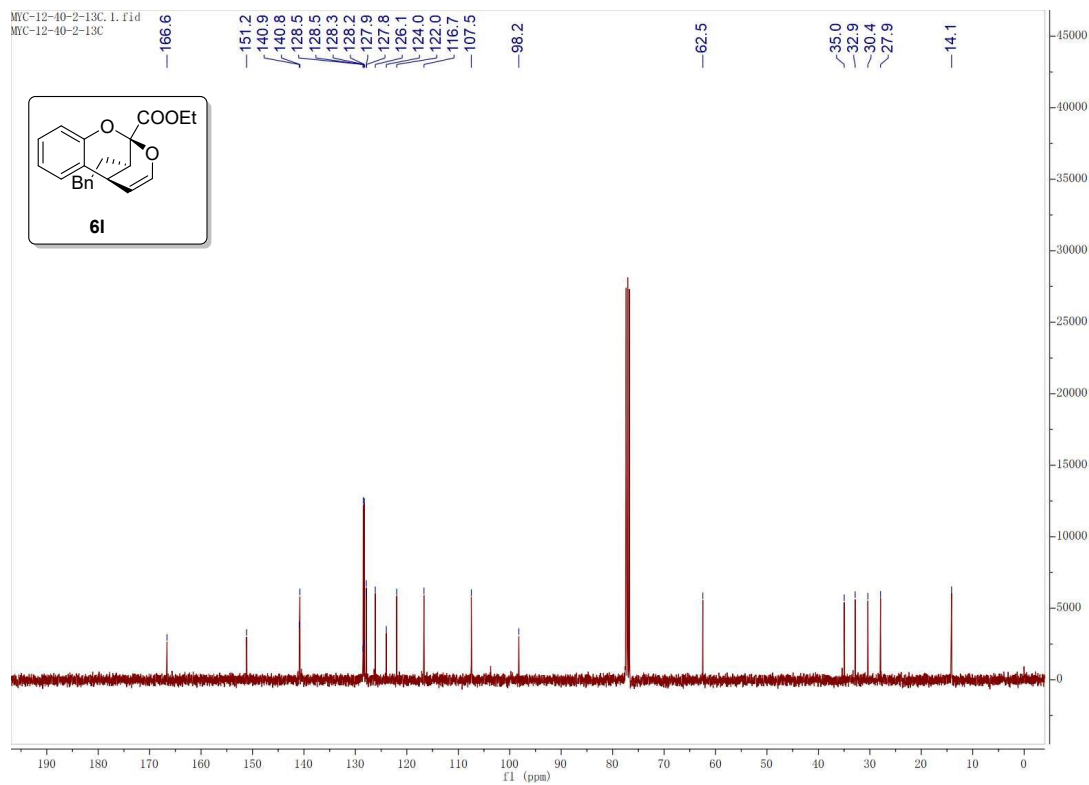

## The HPLC of racemic 6l

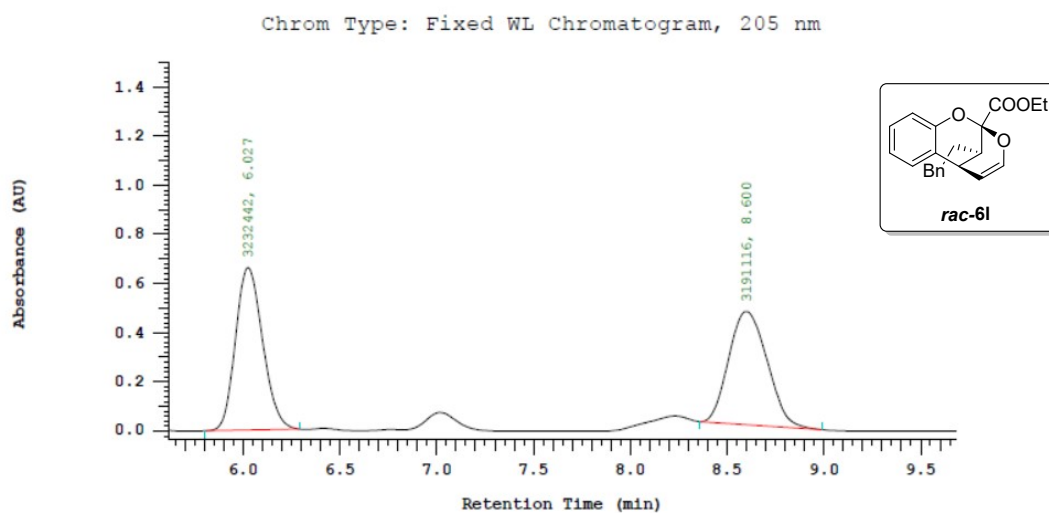

Chrom Type: Fixed WL Chromatogram, 205 nm  
Peak Quantitation: AREA  
Calculation Method: AREA%

| No. | RT    | Area    | Area %  | BC |
|-----|-------|---------|---------|----|
| 1   | 6.027 | 3232442 | 50.322  | BB |
| 2   | 8.600 | 3191116 | 49.678  | BB |
|     |       | 6423558 | 100.000 |    |

## The HPLC of chiral 6l

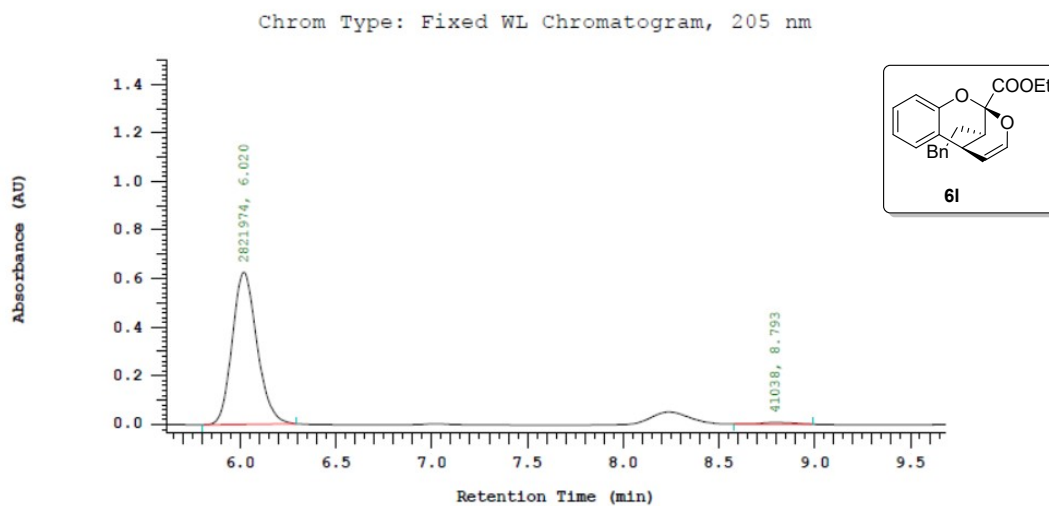

Chrom Type: Fixed WL Chromatogram, 205 nm  
Peak Quantitation: AREA  
Calculation Method: AREA%

| No. | RT    | Area    | Area %  | BC |
|-----|-------|---------|---------|----|
| 1   | 6.020 | 2821974 | 98.567  | BB |
| 2   | 8.793 | 41038   | 1.433   | BB |
|     |       | 2863012 | 100.000 |    |



### The $^1\text{H}$ NMR spectrum of 6m (400 MHz, $\text{CDCl}_3$ )

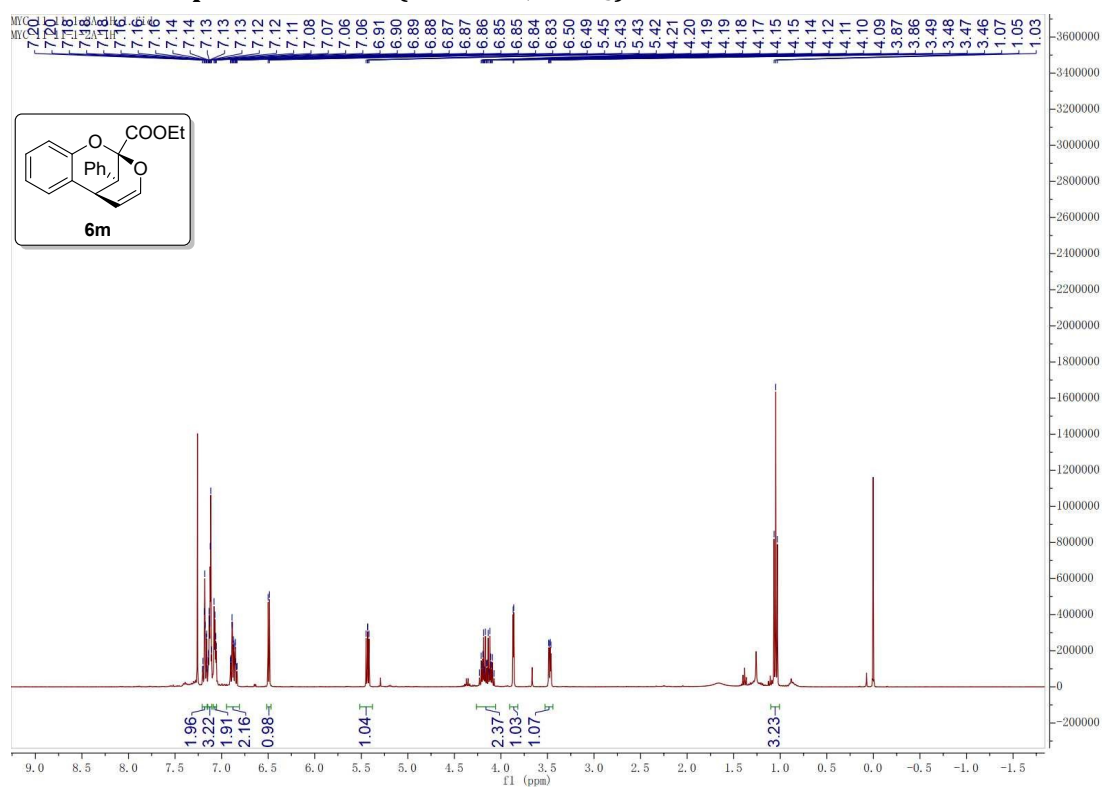

### The $^{13}\text{C}$ NMR spectrum of 6m (100 MHz, $\text{CDCl}_3$ )

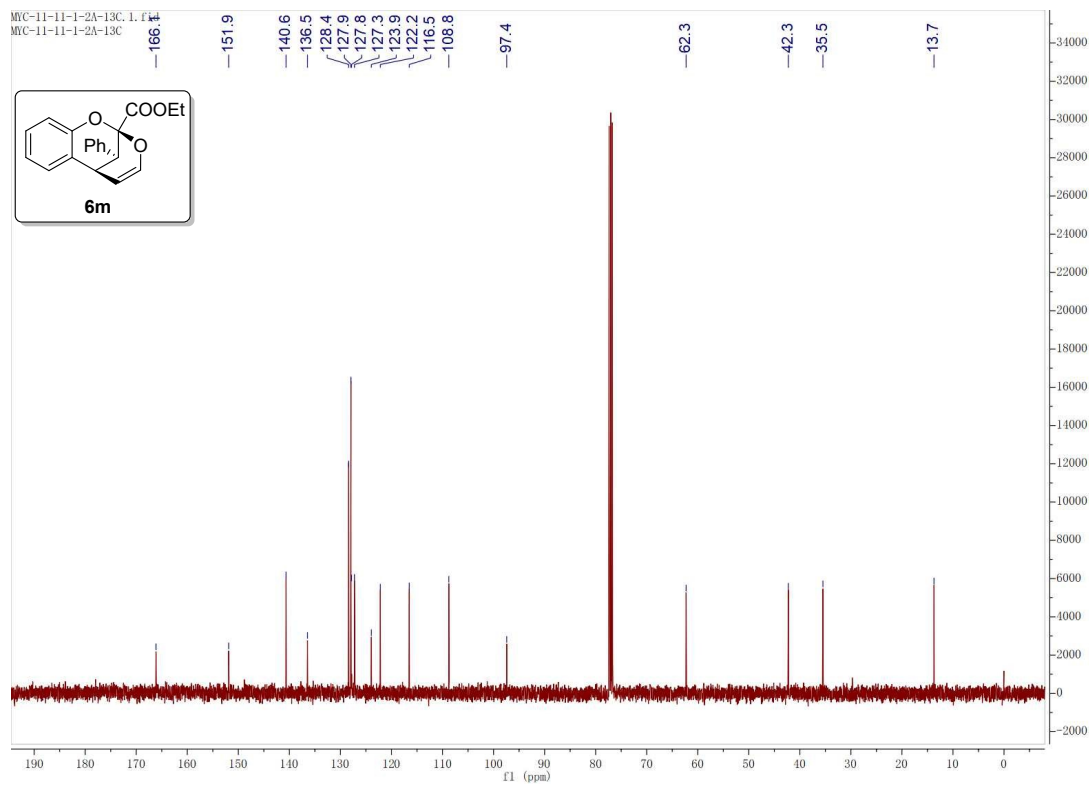

## The HPLC of racemic 6m

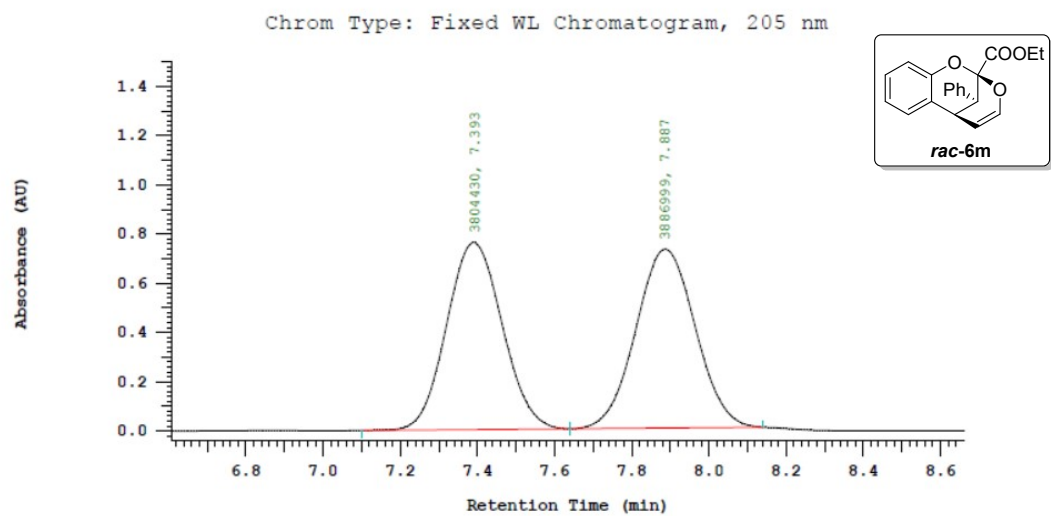

Chrom Type: Fixed WL Chromatogram, 205 nm  
 Peak Quantitation: AREA  
 Calculation Method: AREA%

| No. | RT    | Area    | Area %  | BC |
|-----|-------|---------|---------|----|
| 1   | 7.393 | 3804430 | 49.463  | BB |
| 2   | 7.887 | 3886999 | 50.537  | BB |
|     |       | 7691429 | 100.000 |    |

## The HPLC of chiral 6m

Chrom Type: Fixed WL Chromatogram, 205 nm

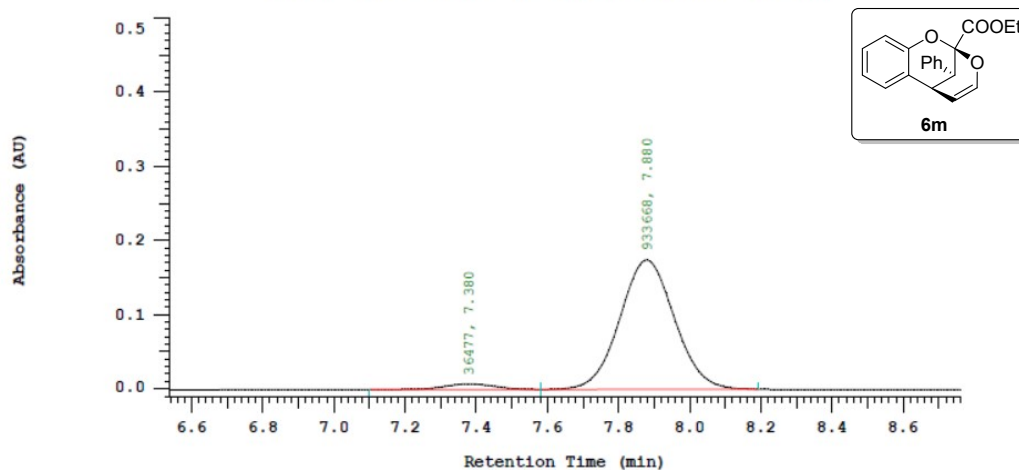

Chrom Type: Fixed WL Chromatogram, 205 nm

Peak Quantitation: AREA

Calculation Method: AREA%

| No. | RT    | Area   | Area %  | BC |
|-----|-------|--------|---------|----|
| 1   | 7.380 | 36477  | 3.760   | BB |
| 2   | 7.880 | 933668 | 96.240  | BB |
|     |       | 970145 | 100.000 |    |

**6n**

dr: 8:1

Integration values: 1.06, 1.14, 1.02, 1.09, 0.13, 1.00, 1.09, 1.27, 1.05, 1.11, 2.35, 1.04, 1.08, 1.22, 1.34, 3.33.

CCOC(=O)[C@H]1C=CC2=C1Cc1ccccc12  
**6n**

<sup>13</sup>C NMR spectrum (CDCl<sub>3</sub>) of compound **6n**. The x-axis represents the chemical shift (f1) in ppm, ranging from 190 to 0. The y-axis represents the intensity, ranging from -1.00 × 10<sup>5</sup> to 1.50 × 10<sup>7</sup>. The spectrum shows several peaks, with the most intense at 77.0 ppm (CDCl<sub>3</sub> solvent). Other significant peaks are at 166.6, 151.1, 140.8, 134.3, 128.0, 127.8, 123.9, 122.0, 117.8, 116.6, 107.7, 97.9, 62.5, 35.1, 31.1, 30.1, and 14.1 ppm.

## The HPLC of racemic 6n

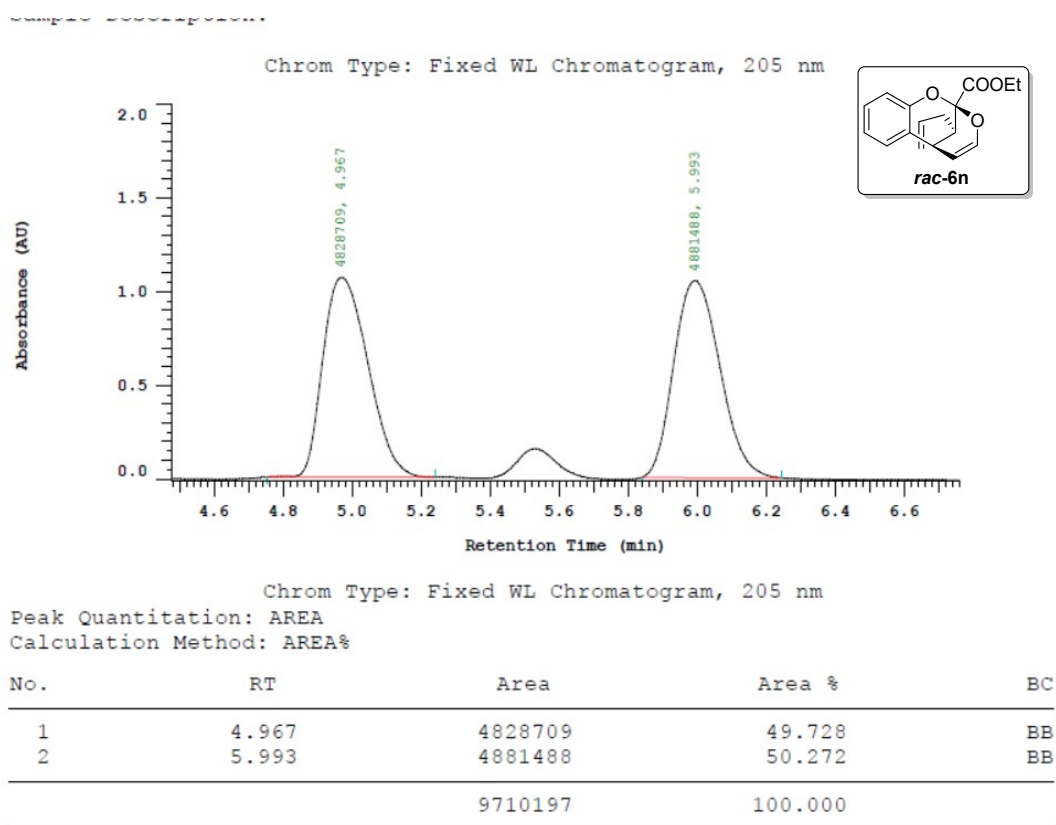

## The HPLC of chiral 6n

Chrom Type: Fixed WL Chromatogram, 205 nm

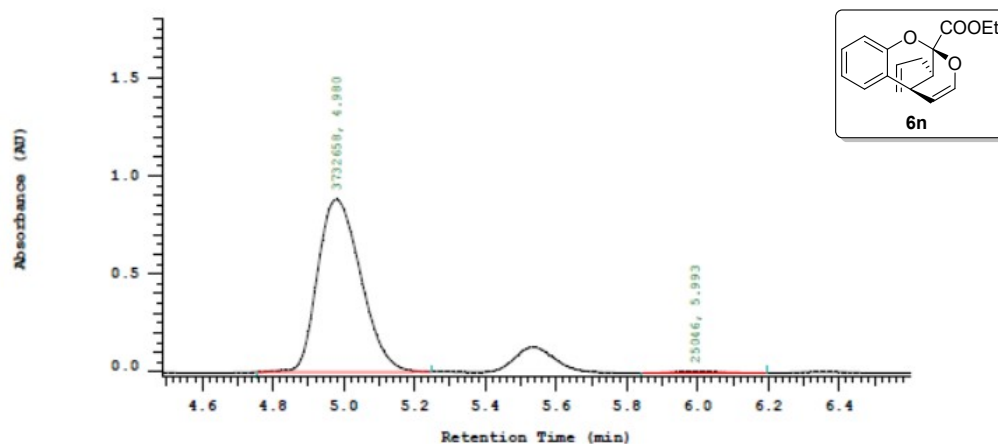

Chrom Type: Fixed WL Chromatogram, 205 nm

Peak Quantitation: AREA  
Calculation Method: AREA%

| No. | RT    | Area    | Area %  | BC |
|-----|-------|---------|---------|----|
| 1   | 4.980 | 3732658 | 99.333  | BB |
| 2   | 5.993 | 25046   | 0.667   | BB |
|     |       | 3757704 | 100.000 |    |

### The $^1\text{H}$ NMR spectrum of **6o** (400 MHz, $\text{CDCl}_3$ )

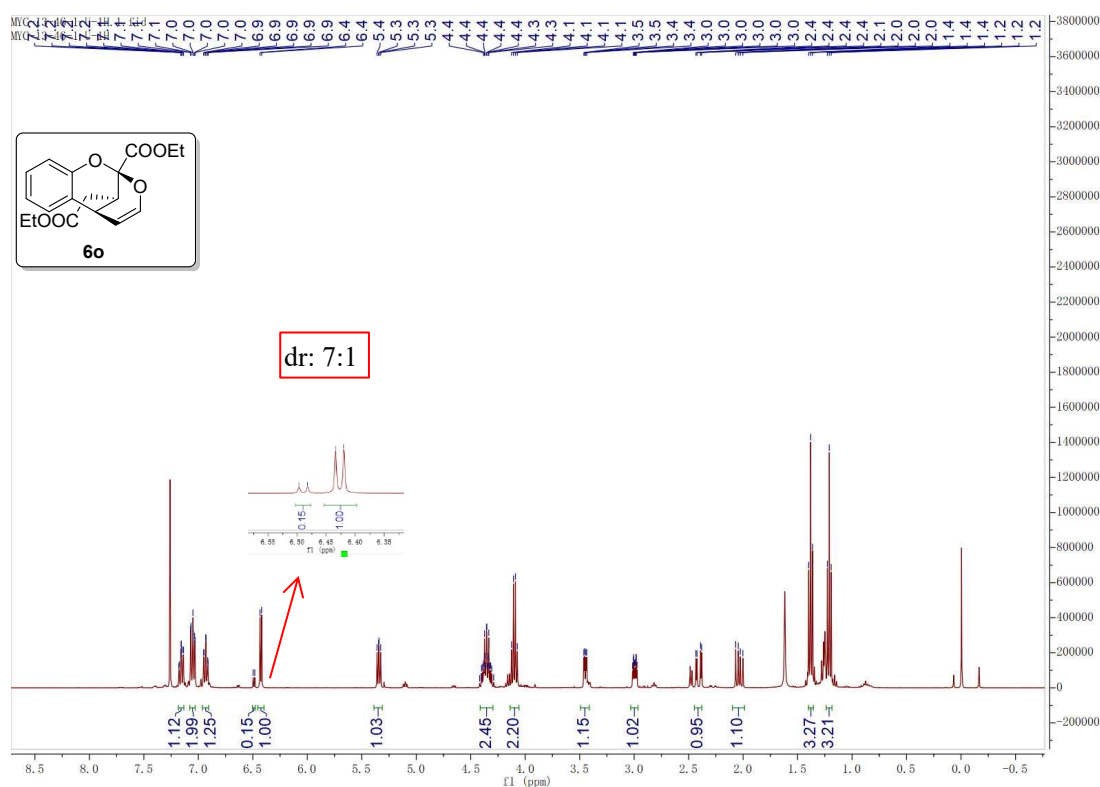

### The $^{13}\text{C}$ NMR spectrum of **6o** (100 MHz, $\text{CDCl}_3$ )

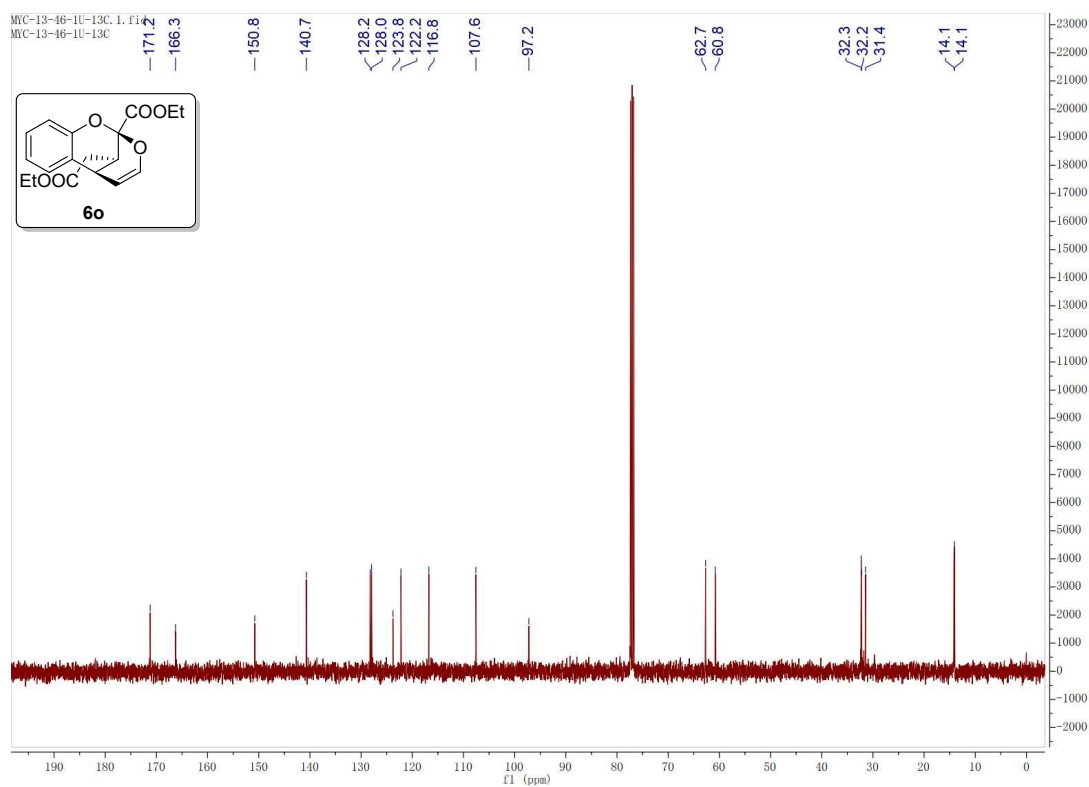

## The HPLC of racemic 6o

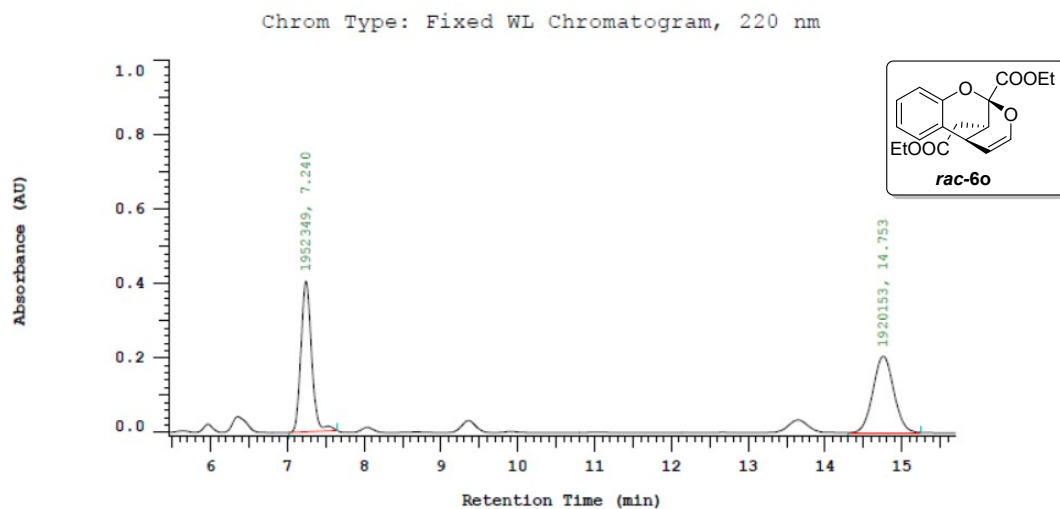

Chrom Type: Fixed WL Chromatogram, 220 nm  
 Peak Quantitation: AREA  
 Calculation Method: AREA%

| No. | RT     | Area    | Area %  | BC |
|-----|--------|---------|---------|----|
| 1   | 7.240  | 1952349 | 50.416  | BB |
| 2   | 14.753 | 1920153 | 49.584  | BB |
|     |        | 3872502 | 100.000 |    |

## The HPLC of chiral 6o

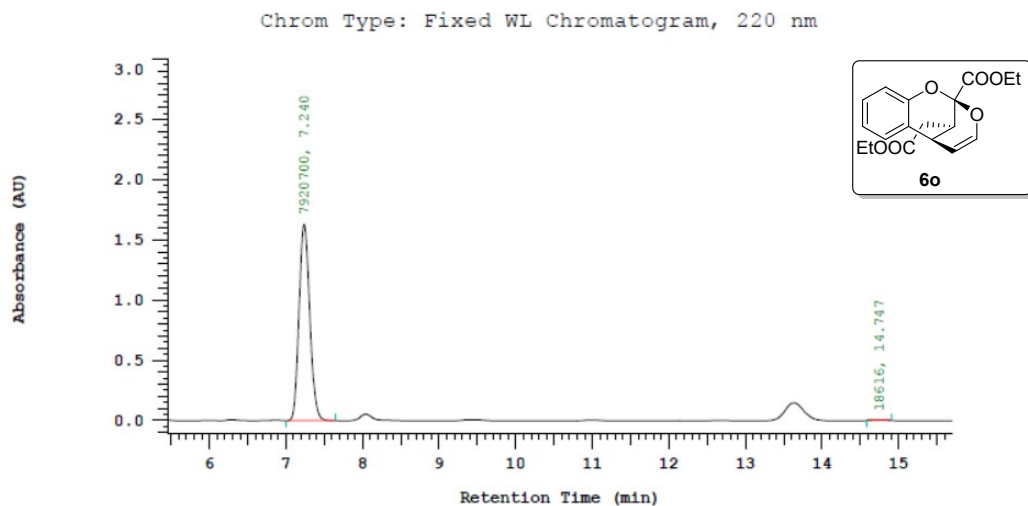

Chrom Type: Fixed WL Chromatogram, 220 nm  
 Peak Quantitation: AREA  
 Calculation Method: AREA%

| No. | RT     | Area    | Area %  | BC |
|-----|--------|---------|---------|----|
| 1   | 7.240  | 7920700 | 99.766  | BB |
| 2   | 14.747 | 18616   | 0.234   | BB |
|     |        | 7939316 | 100.000 |    |



### The $^1\text{H}$ NMR spectrum of 6p (400 MHz, $\text{CDCl}_3$ )

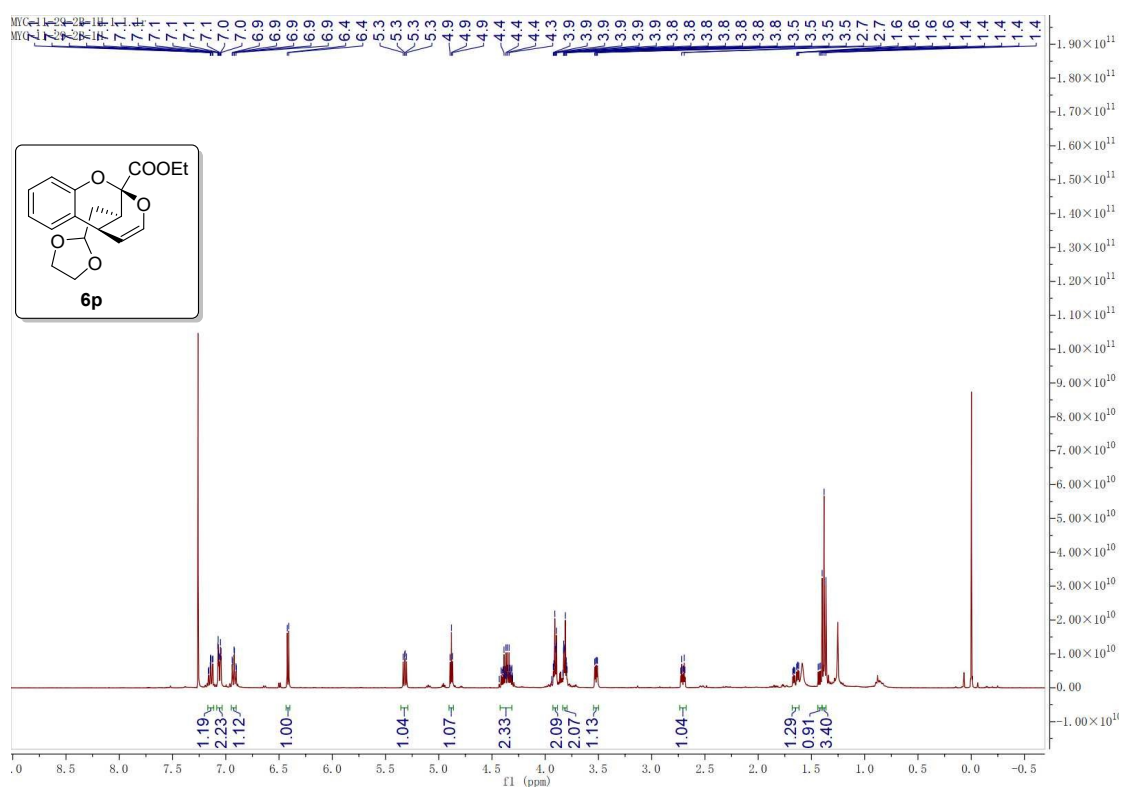

### The $^{13}\text{C}$ NMR spectrum of 6p (100 MHz, $\text{CDCl}_3$ )

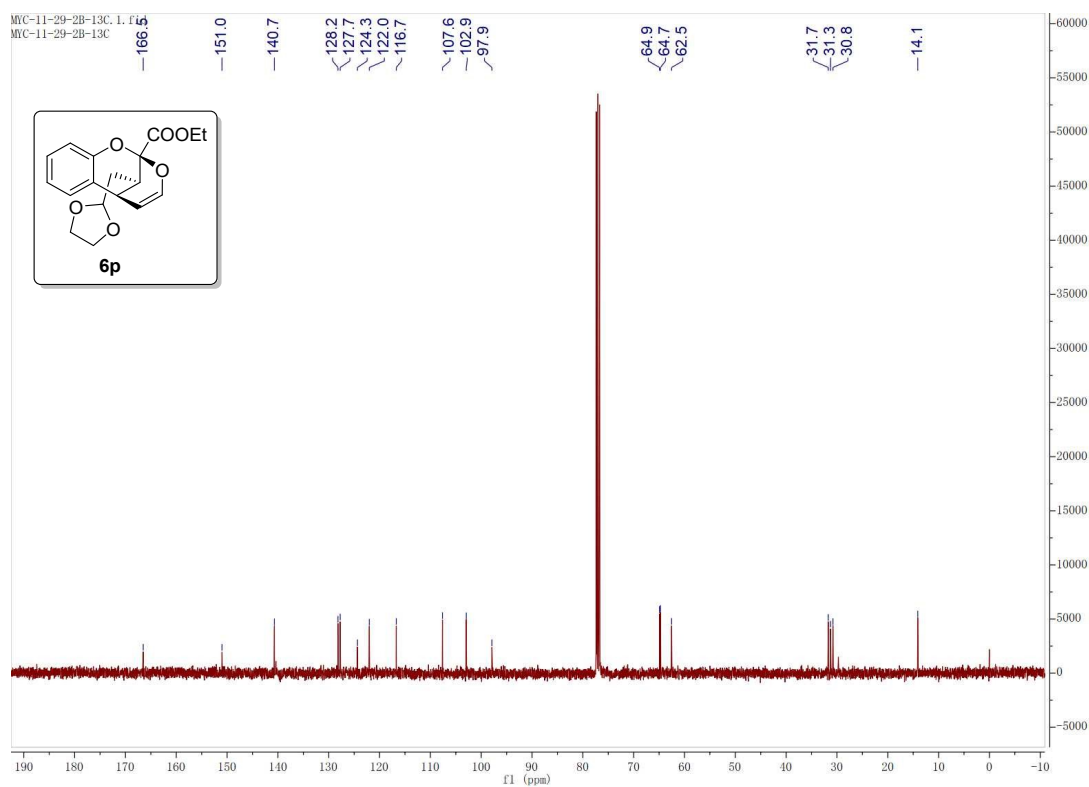

## The HPLC of racemic 6p

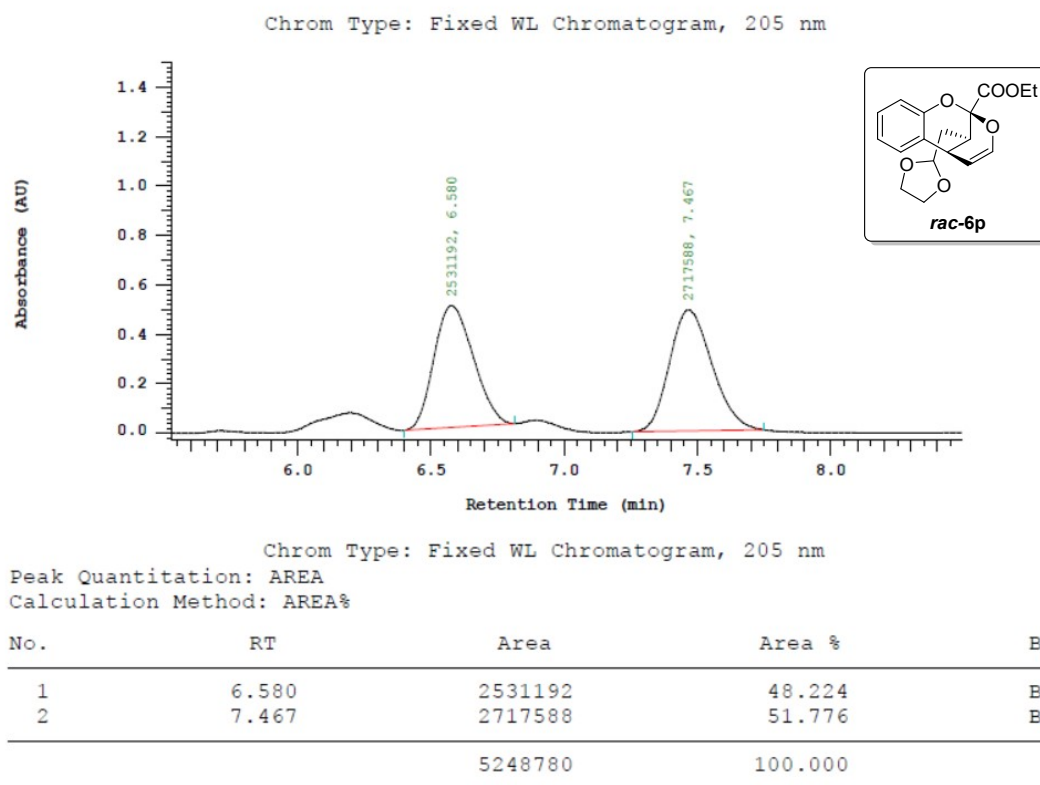

## The HPLC of chiral 6p

Chrom Type: Fixed WL Chromatogram, 205 nm

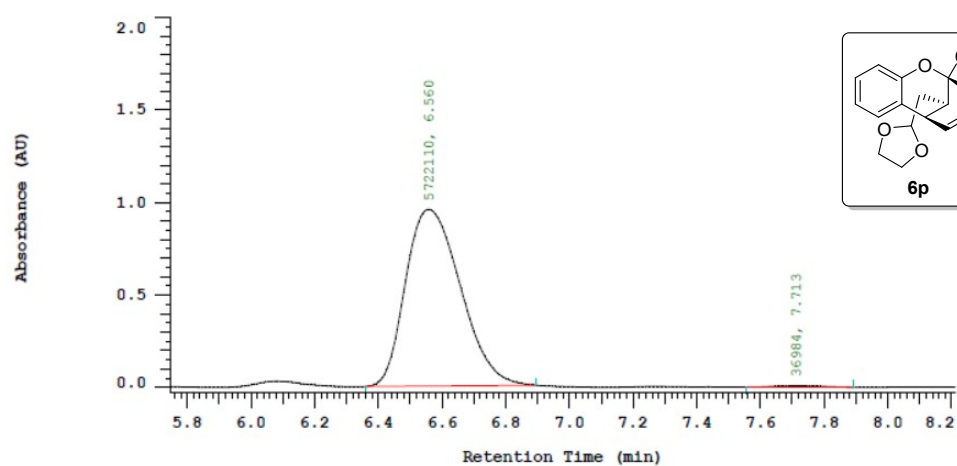

Chrom Type: Fixed WL Chromatogram, 205 nm

Peak Quantitation: AREA

Calculation Method: AREA%

| No. | RT    | Area    | Area %  | BC |
|-----|-------|---------|---------|----|
| 1   | 6.560 | 5722110 | 99.358  | BB |
| 2   | 7.713 | 36984   | 0.642   | BB |
|     |       | 5759094 | 100.000 |    |

CC1=C(C(=O)OCC=C)OC2=CC=CC=C2O1  
**6q**

166.4  
 150.8  
 140.6  
 131.2  
 128.0  
 127.7  
 124.2  
 121.9  
 119.4  
 116.6  
 108.0  
 98.4  
 66.7  
 33.5  
 30.6  
 30.5  
 13.1

## The HPLC of racemic 6q

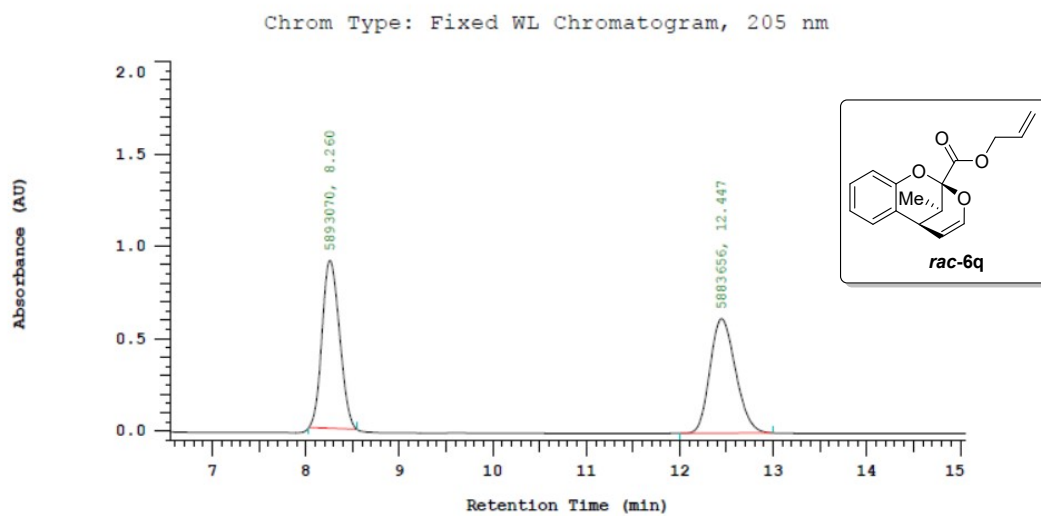

Chrom Type: Fixed WL Chromatogram, 205 nm

Peak Quantitation: AREA

Calculation Method: AREA%

| No. | RT     | Area     | Area %  | BC |
|-----|--------|----------|---------|----|
| 1   | 8.260  | 5893070  | 50.040  | BB |
| 2   | 12.447 | 5883656  | 49.960  | BB |
|     |        | 11776726 | 100.000 |    |

## The HPLC of chiral 6q

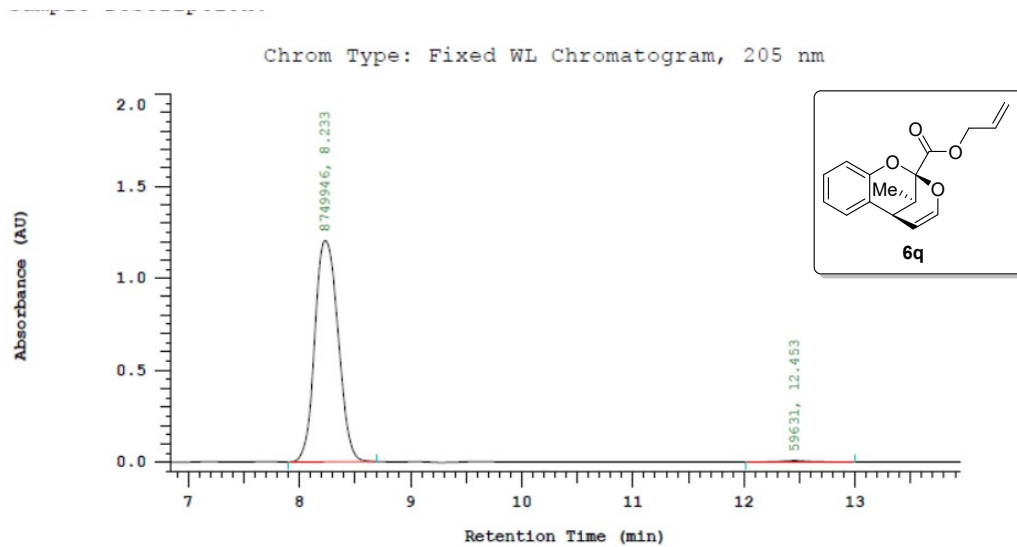

Chrom Type: Fixed WL Chromatogram, 205 nm  
 Peak Quantitation: AREA  
 Calculation Method: AREA%

| No. | RT     | Area    | Area %  | BC |
|-----|--------|---------|---------|----|
| 1   | 8.233  | 8749946 | 99.323  | BB |
| 2   | 12.453 | 59631   | 0.677   | BB |
|     |        | 8809577 | 100.000 |    |

### The $^1\text{H}$ NMR spectrum of 6r (400 MHz, $\text{CDCl}_3$ )

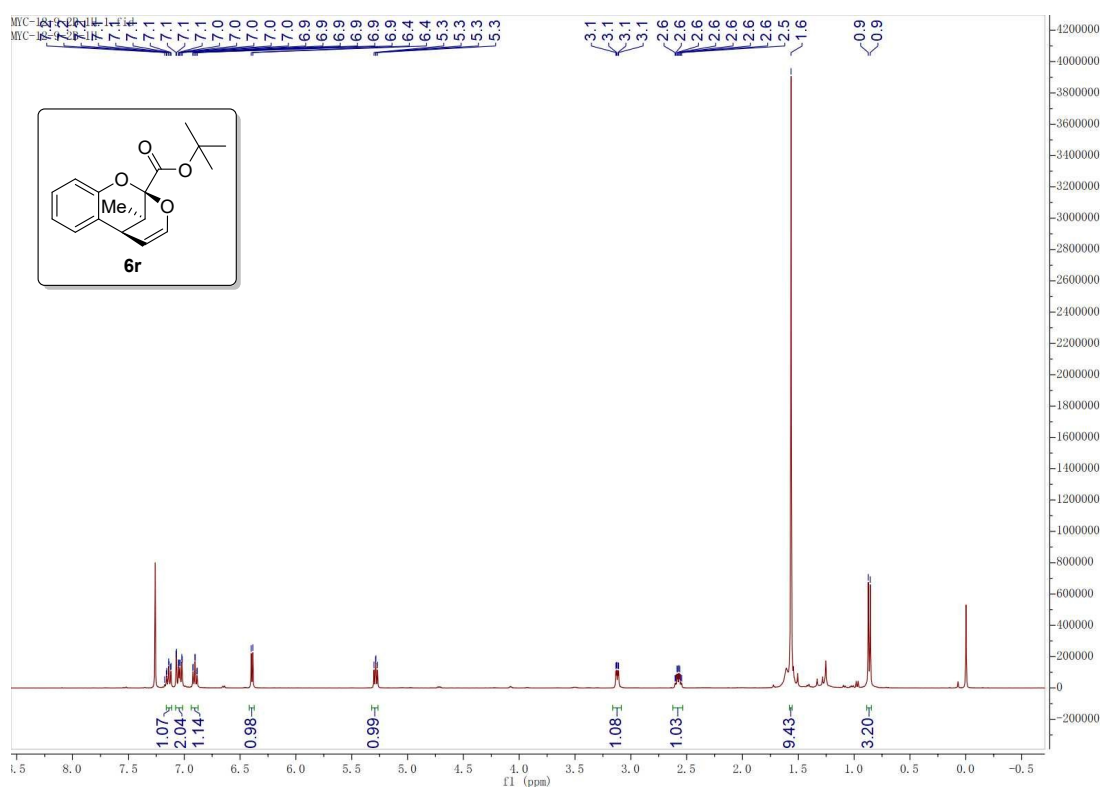

### The $^{13}\text{C}$ NMR spectrum of 6r (100 MHz, $\text{CDCl}_3$ )

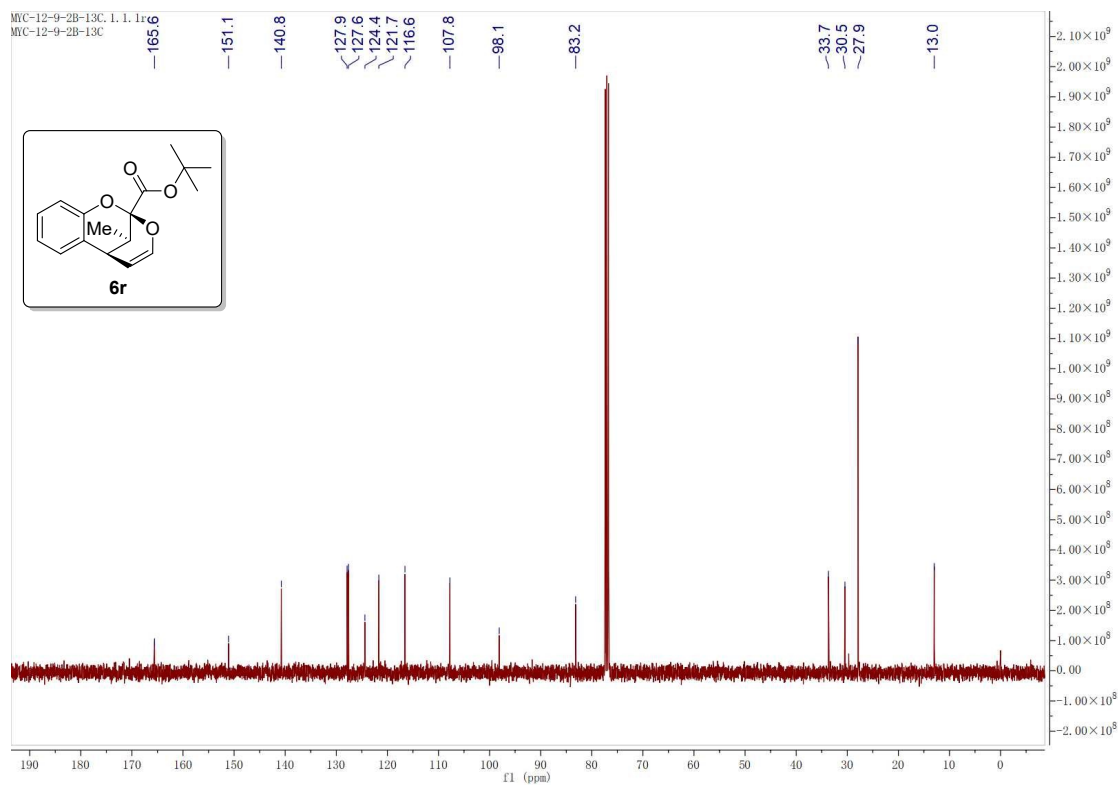

## The HPLC of racemic 6r

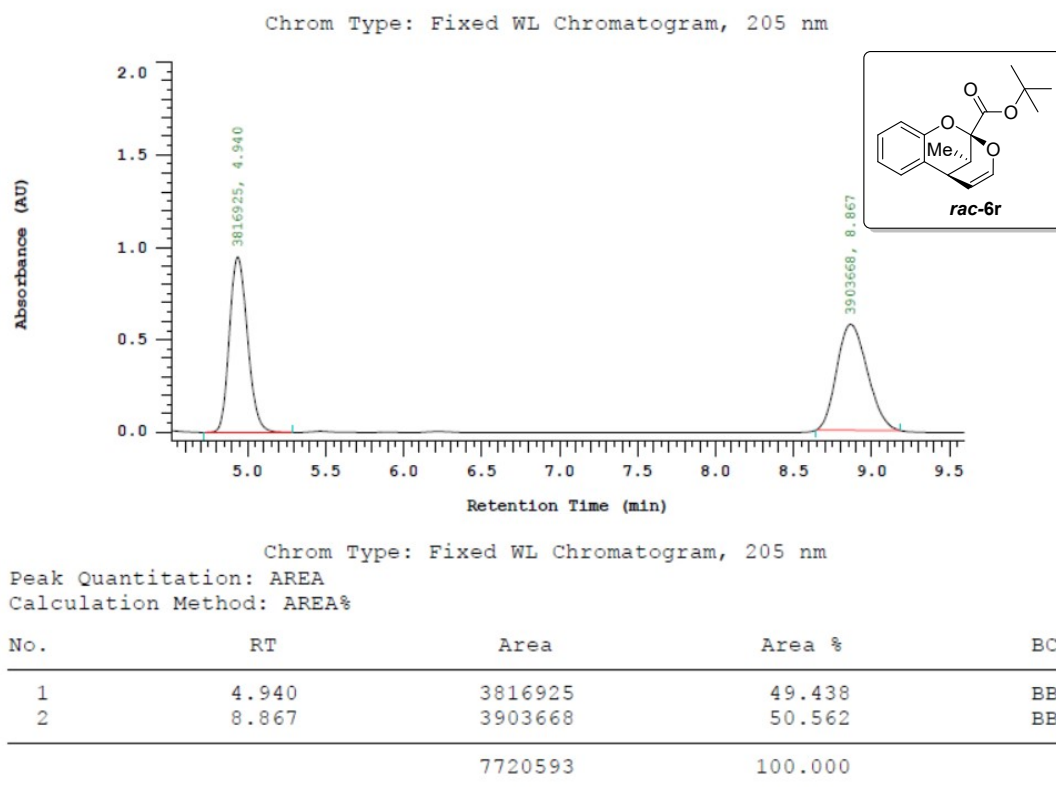

## The HPLC of chiral 6r



Chrom Type: Fixed WL Chromatogram, 205 nm

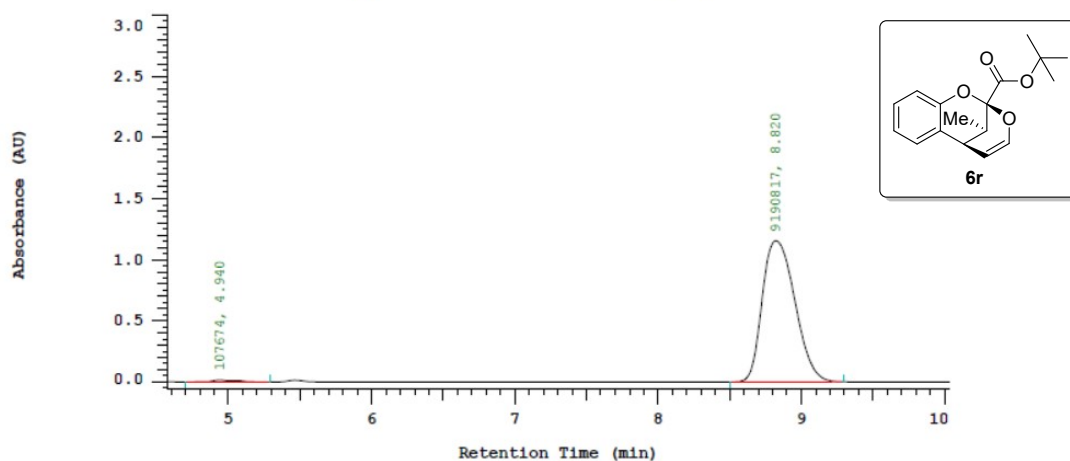

Chrom Type: Fixed WL Chromatogram, 205 nm

Peak Quantitation: AREA  
Calculation Method: AREA%

| No. | RT    | Area    | Area %  | BC |
|-----|-------|---------|---------|----|
| 1   | 4.940 | 107674  | 1.158   | BB |
| 2   | 8.820 | 9190817 | 98.842  | BB |
|     |       | 9298491 | 100.000 |    |

### The $^1\text{H}$ NMR spectrum of 6s (400 MHz, $\text{CDCl}_3$ )

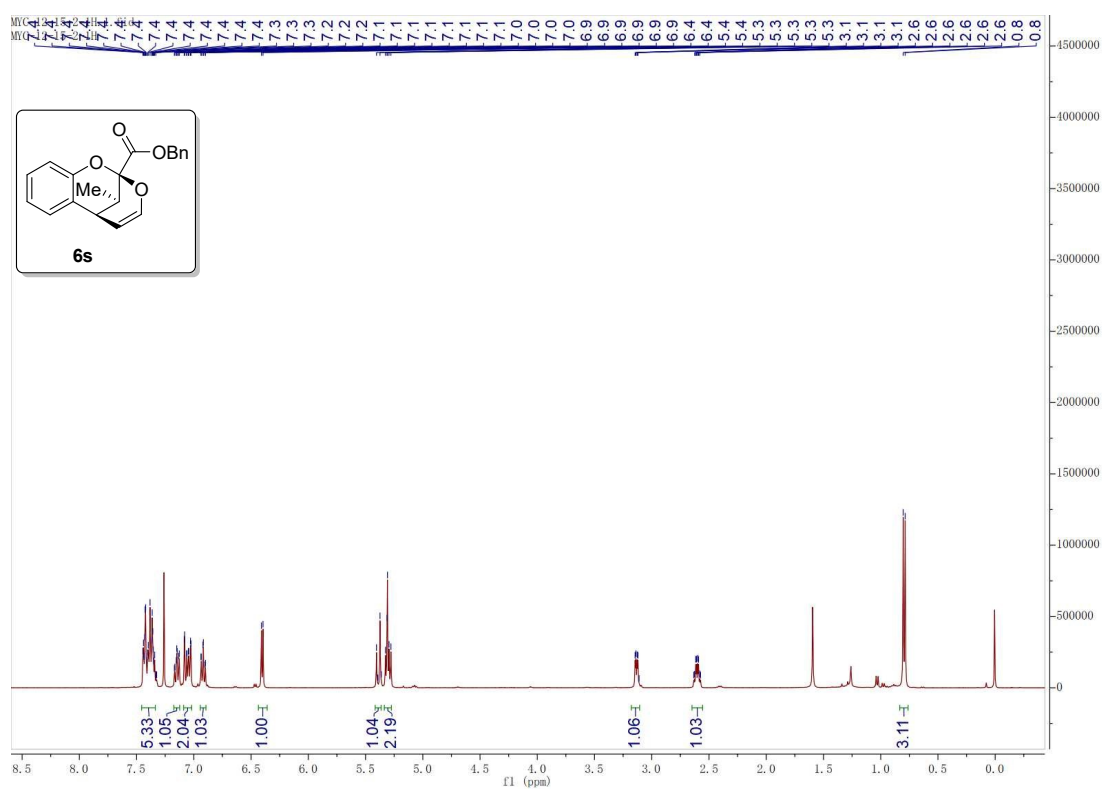

### The $^{13}\text{C}$ NMR spectrum of 6s (100 MHz, $\text{CDCl}_3$ )

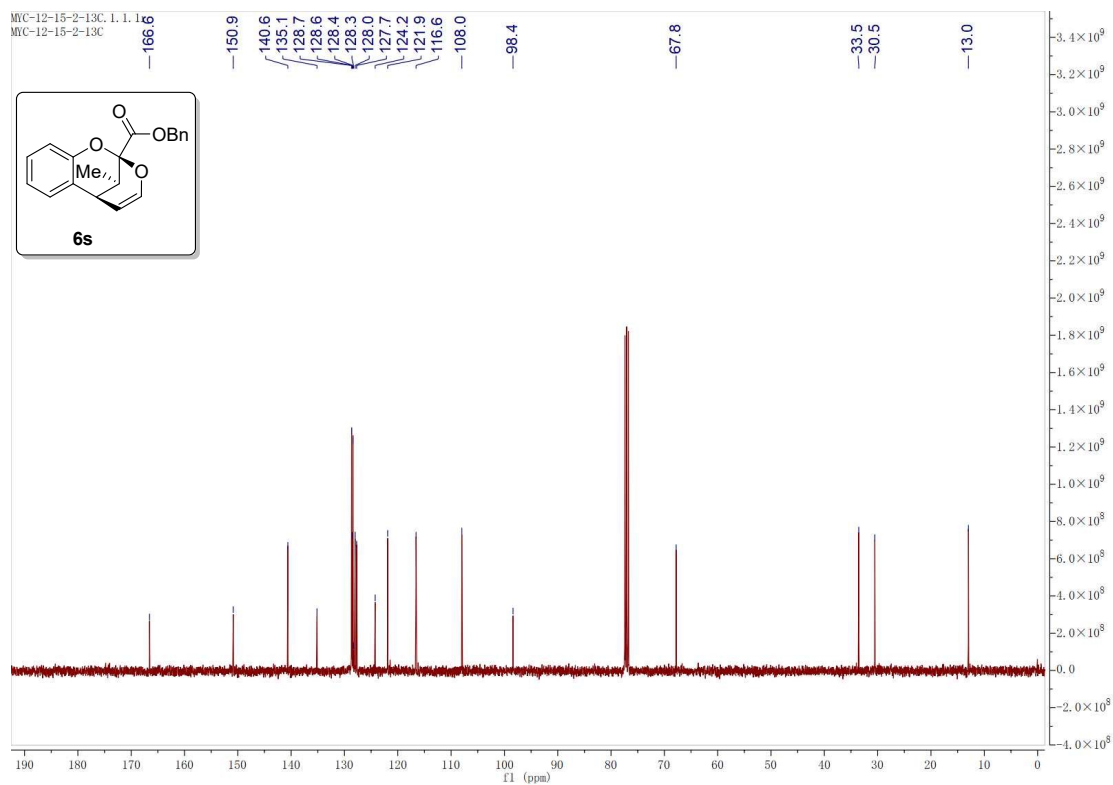

## The HPLC of racemic 6s

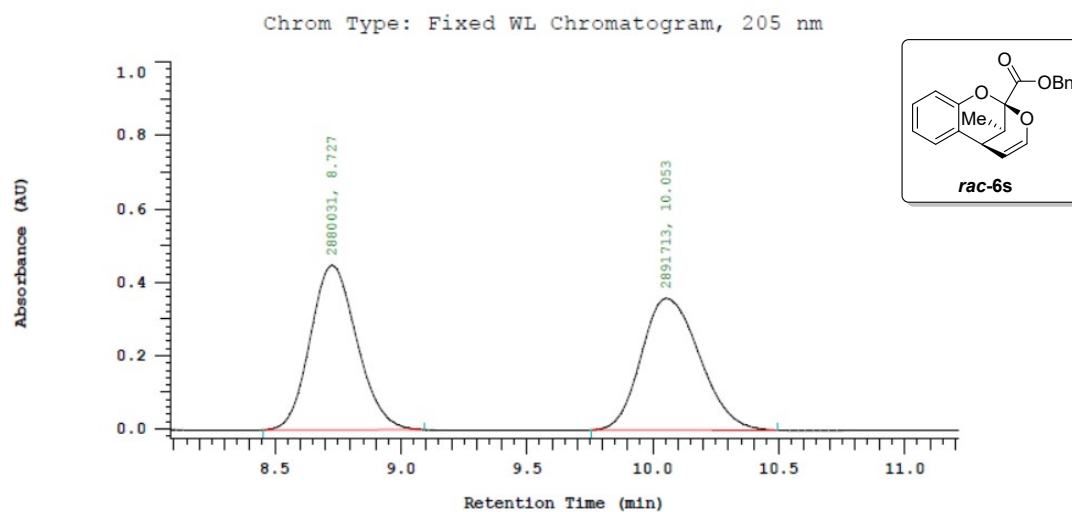

Chrom Type: Fixed WL Chromatogram, 205 nm  
 Peak Quantitation: AREA  
 Calculation Method: AREA%

| No. | RT     | Area    | Area %  | BC |
|-----|--------|---------|---------|----|
| 1   | 8.727  | 2880031 | 49.899  | BB |
| 2   | 10.053 | 2891713 | 50.101  | BB |
|     |        | 5771744 | 100.000 |    |

## The HPLC of chiral 6s

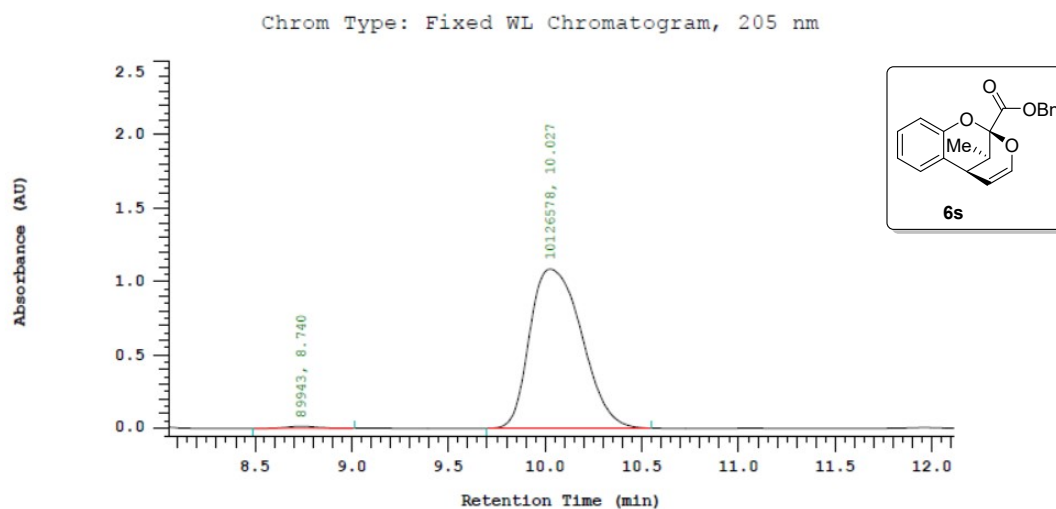

Chrom Type: Fixed WL Chromatogram, 205 nm  
 Peak Quantitation: AREA  
 Calculation Method: AREA%

| No. | RT     | Area     | Area %  | BC |
|-----|--------|----------|---------|----|
| 1   | 8.740  | 89943    | 0.880   | BB |
| 2   | 10.027 | 10126578 | 99.120  | BB |
|     |        | 10216521 | 100.000 |    |

### The $^1\text{H}$ NMR spectrum of 6t (400 MHz, $\text{CDCl}_3$ )

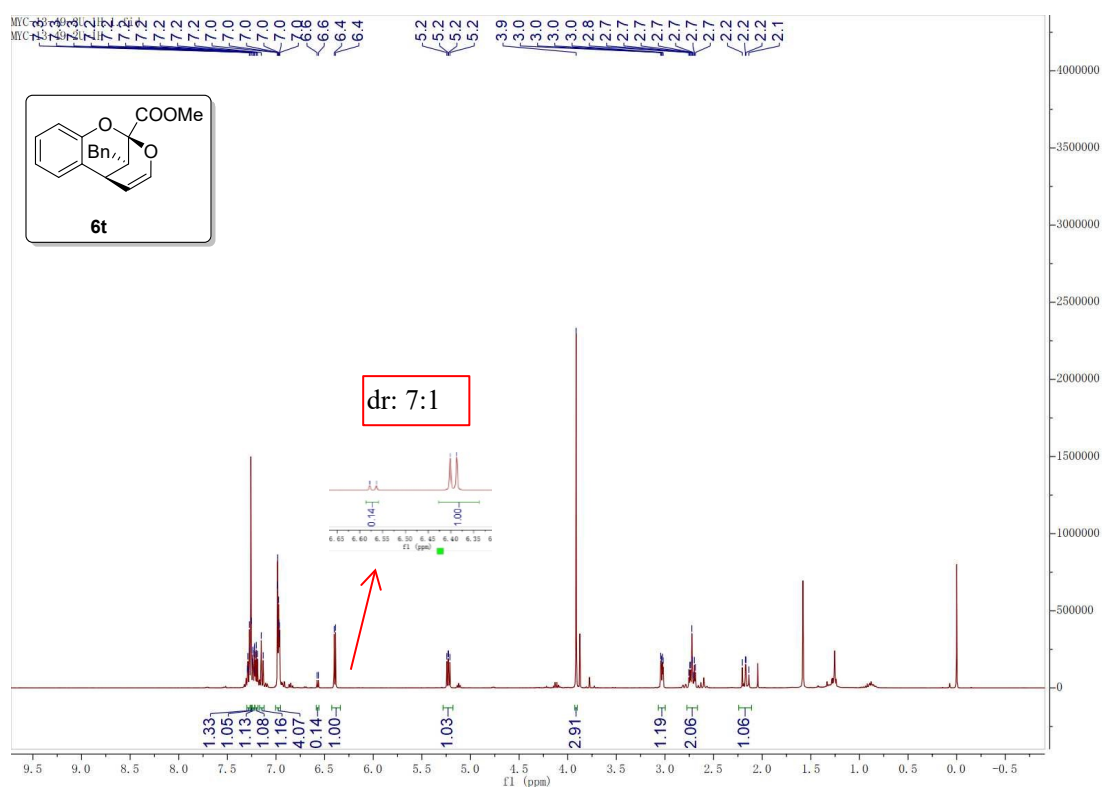

### The $^{13}\text{C}$ NMR spectrum of 6t (100 MHz, $\text{CDCl}_3$ )

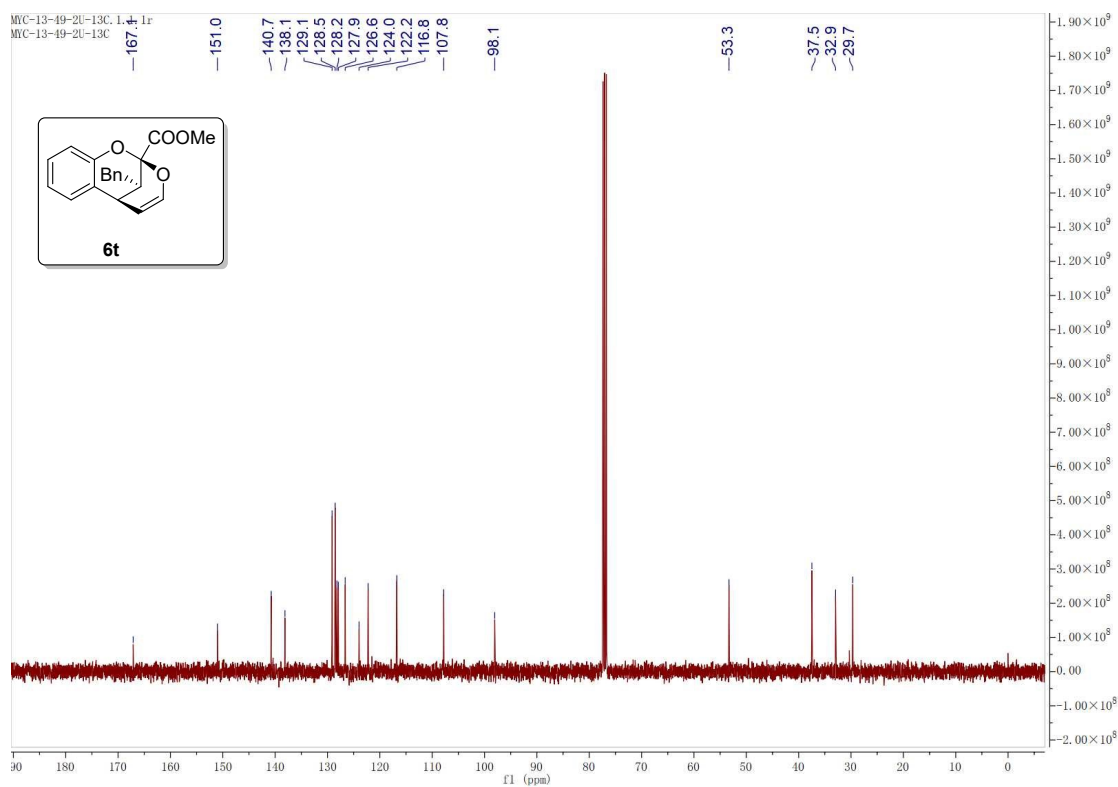

## The HPLC of racemic 6t

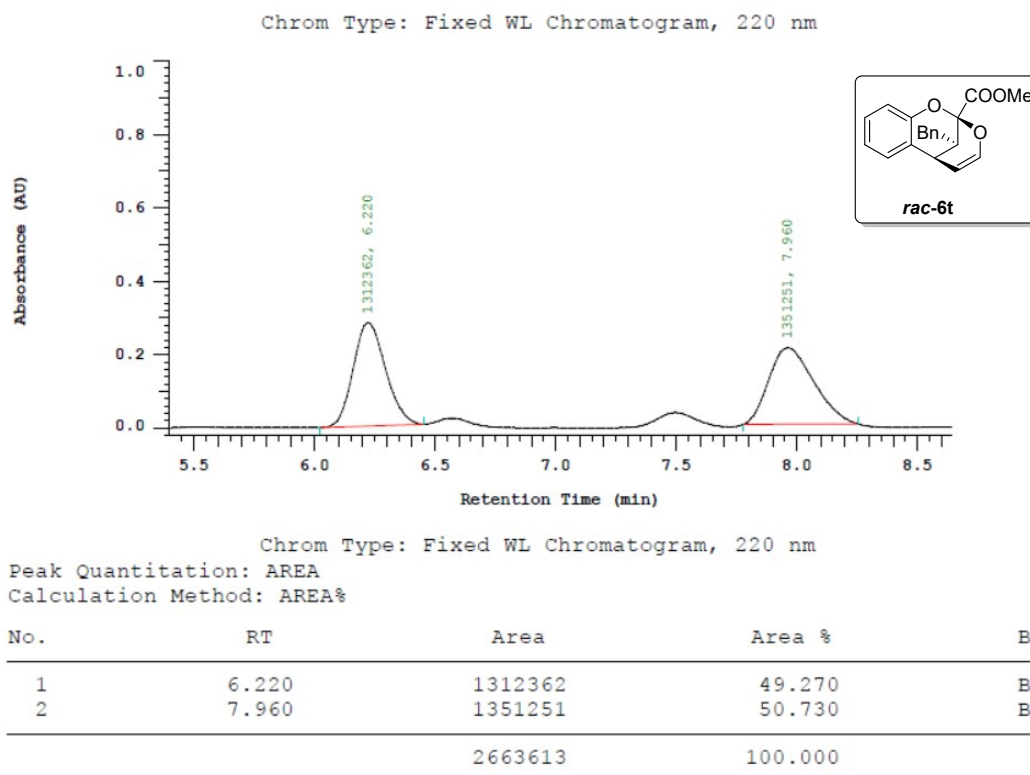

## The HPLC of chiral 6t

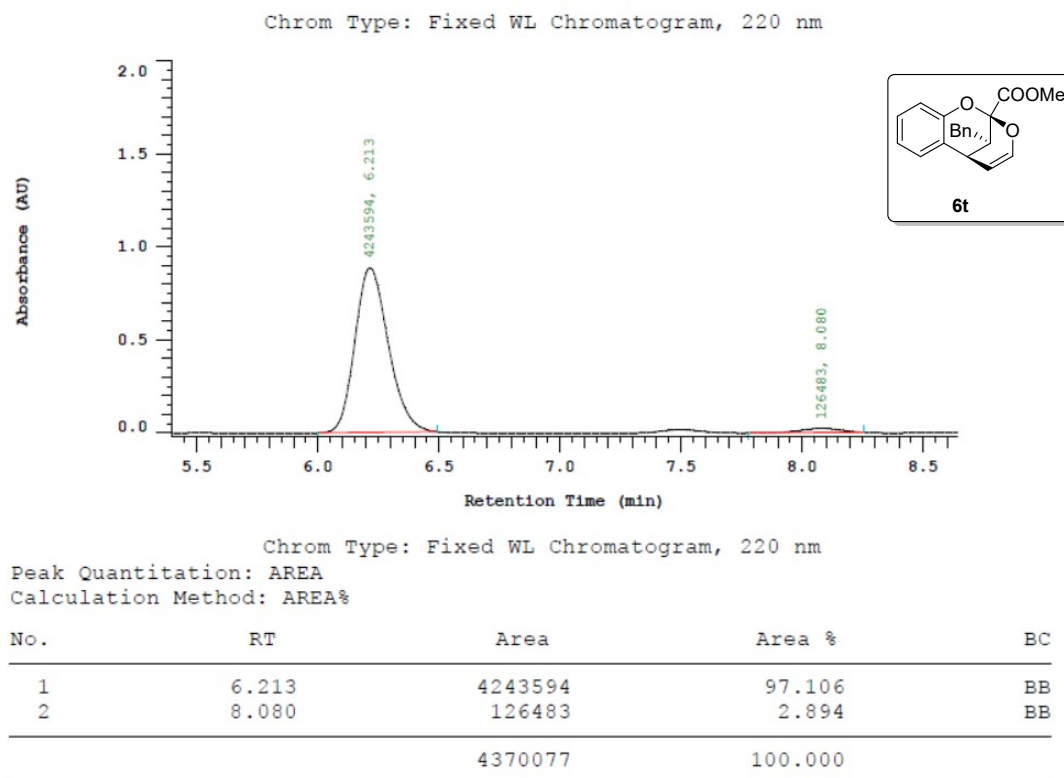

## The <sup>1</sup>H NMR spectrum of 8 (400 MHz, CDCl<sub>3</sub>)

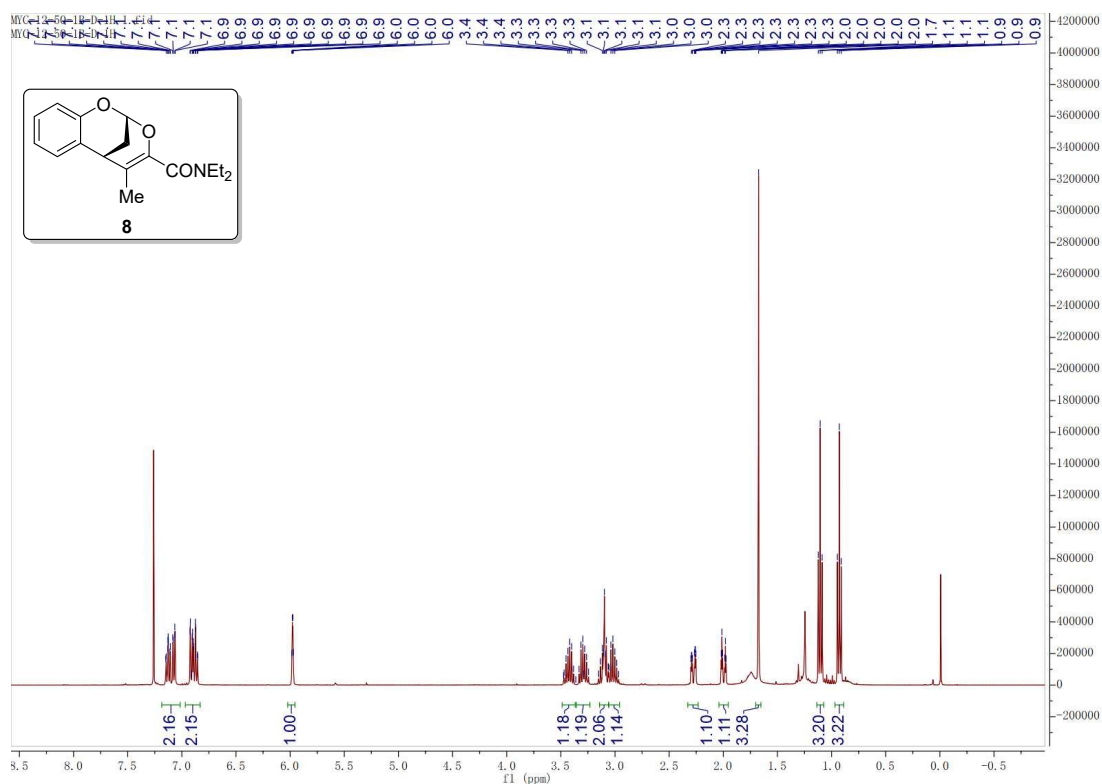

### The <sup>13</sup>C NMR spectrum of 8 (100 MHz, CDCl<sub>3</sub>)

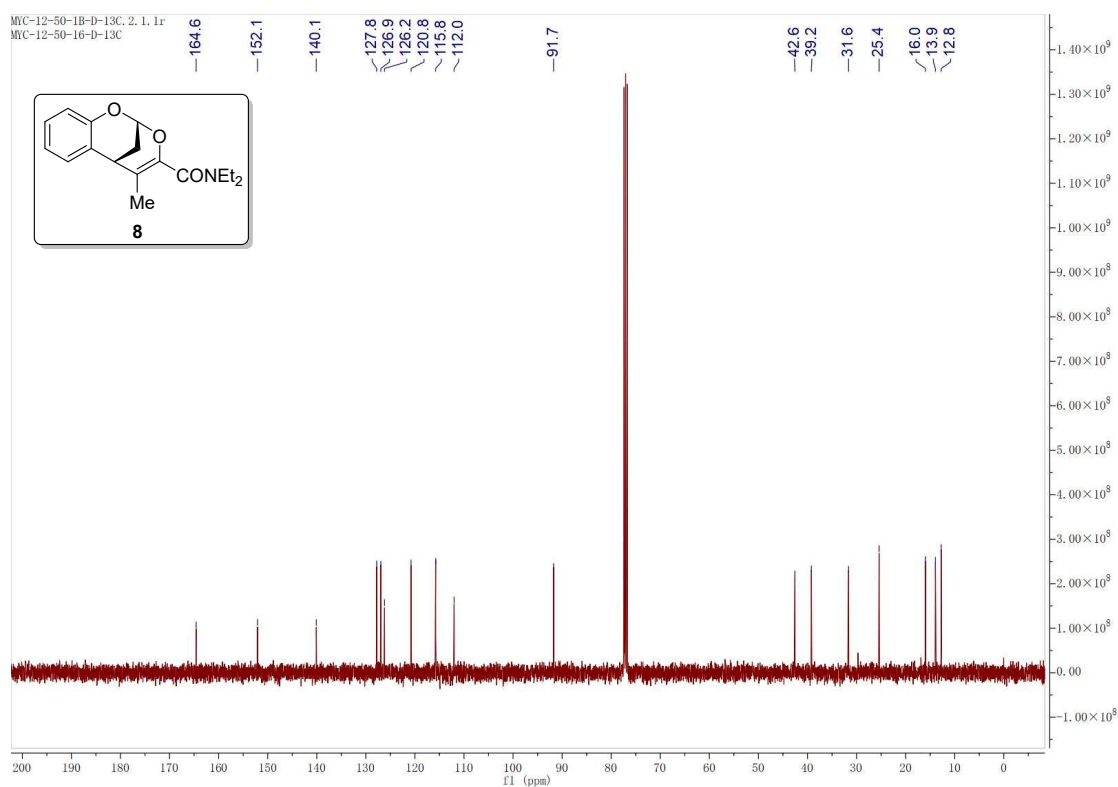

## The HPLC of racemic 8

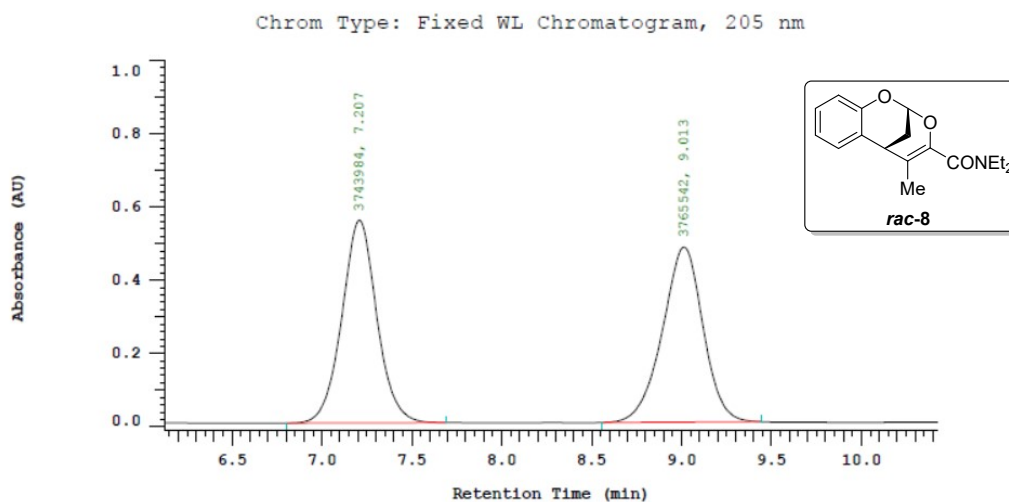

Chrom Type: Fixed WL Chromatogram, 205 nm  
Peak Quantitation: AREA  
Calculation Method: AREA%

| No. | RT    | Area    | Area %  | BC |
|-----|-------|---------|---------|----|
| 1   | 7.207 | 3743984 | 49.856  | BB |
| 2   | 9.013 | 3765542 | 50.144  | BB |
|     |       | 7509526 | 100.000 |    |

## The HPLC of chiral 8

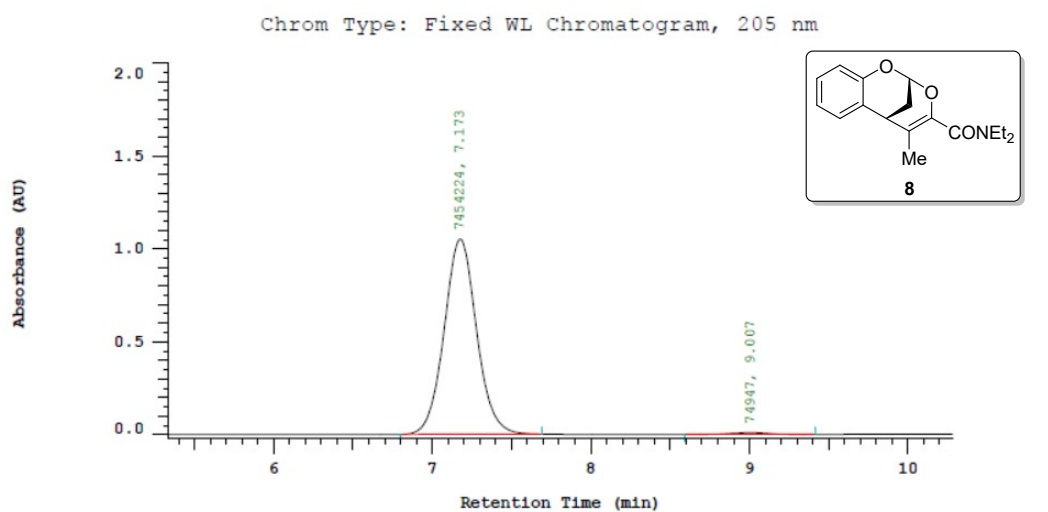

Chrom Type: Fixed WL Chromatogram, 205 nm  
Peak Quantitation: AREA  
Calculation Method: AREA%

| No. | RT    | Area    | Area %  | BC |
|-----|-------|---------|---------|----|
| 1   | 7.173 | 7454224 | 99.005  | BB |
| 2   | 9.007 | 74947   | 0.995   | BB |
|     |       | 7529171 | 100.000 |    |

### The $^1\text{H}$ NMR spectrum of 12 (400 MHz, $\text{CDCl}_3$ )

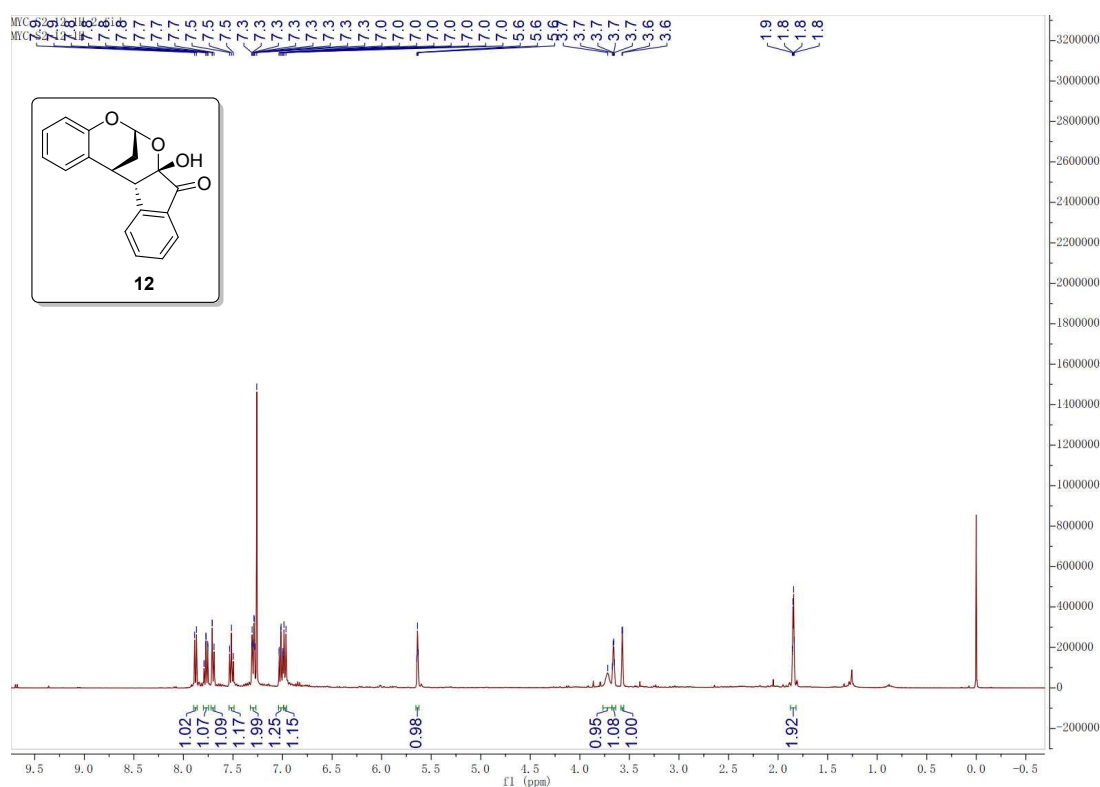

### The $^{13}\text{C}$ NMR spectrum of 12 (100 MHz, $\text{CDCl}_3$ )

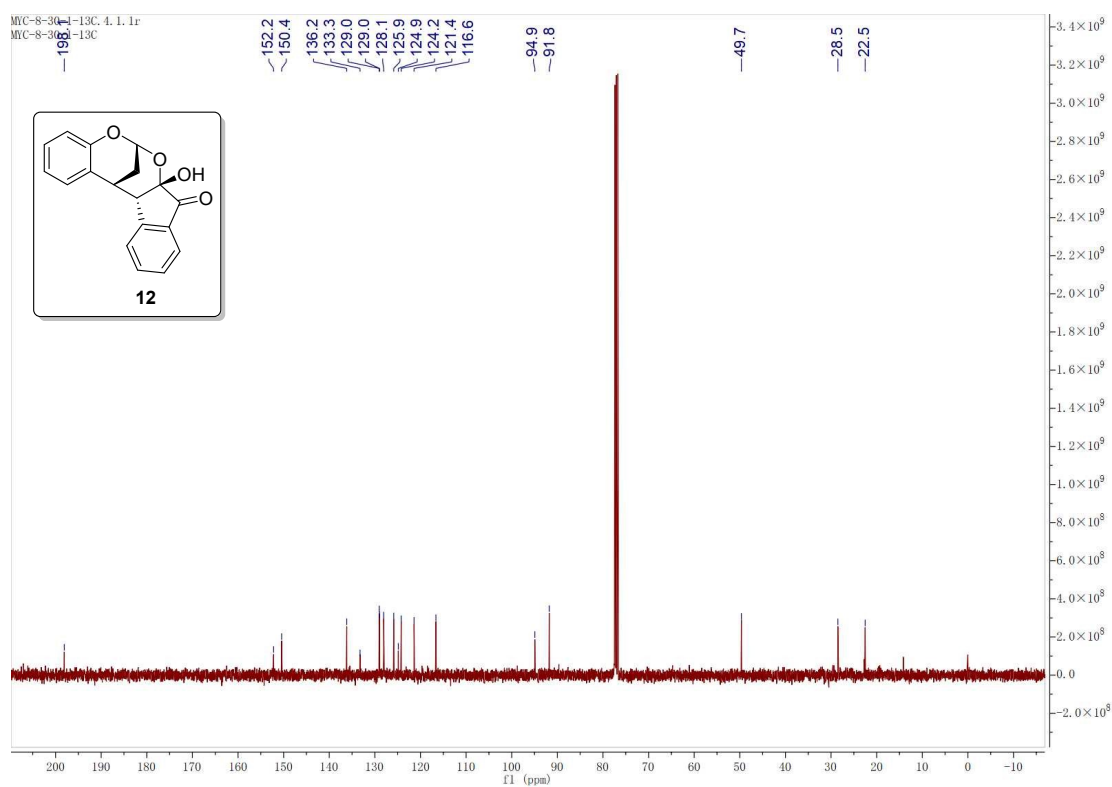



**The NOSEY spectrum of 12 (400 MHz, CDCl<sub>3</sub>)**

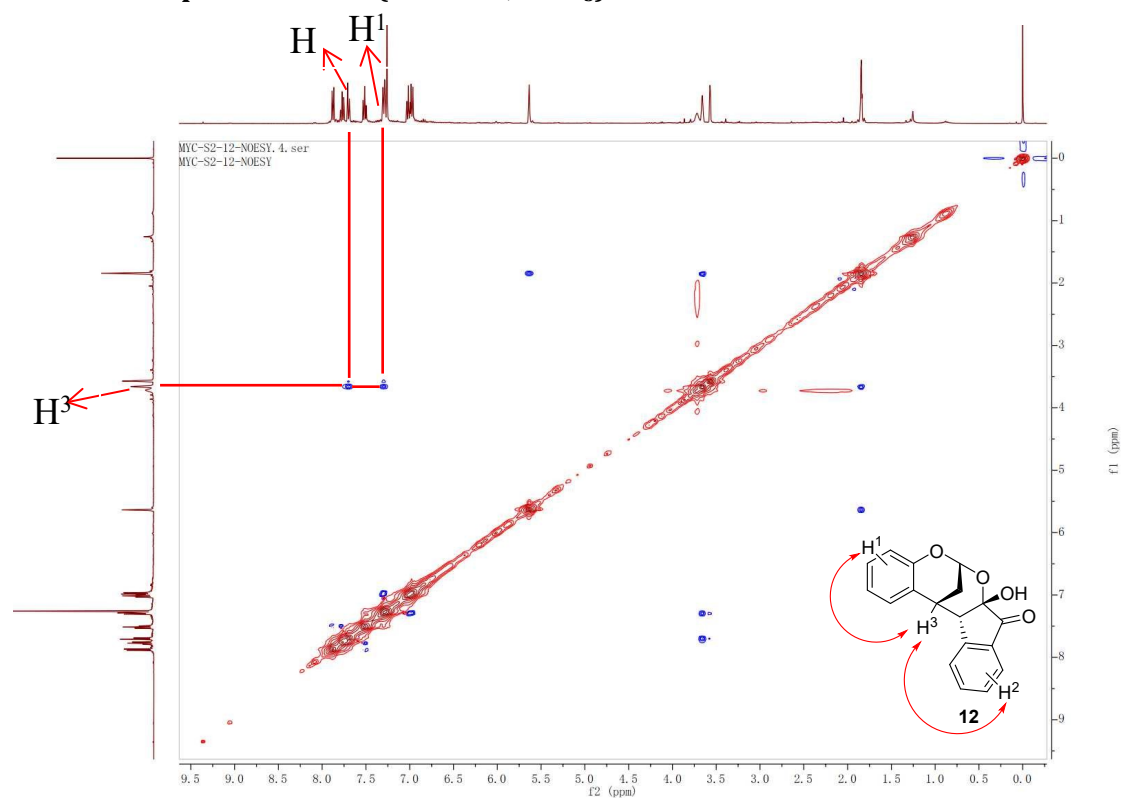

## The HPLC of racemic 12

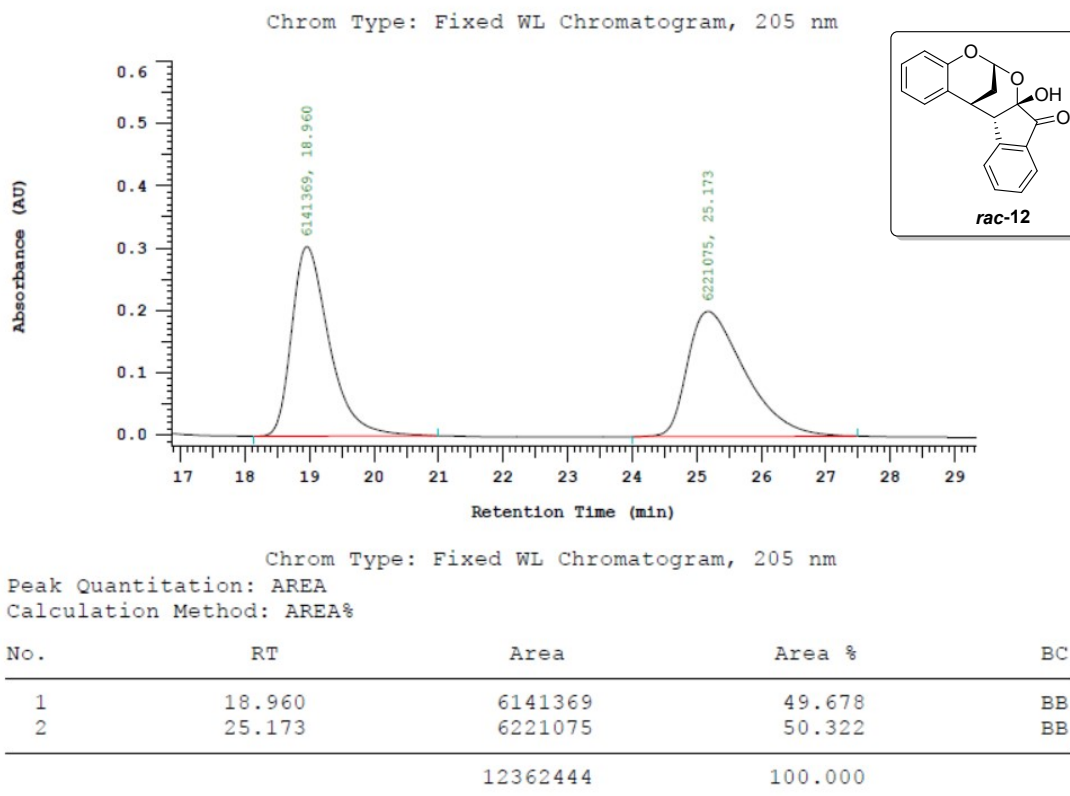

## The HPLC of chiral 12

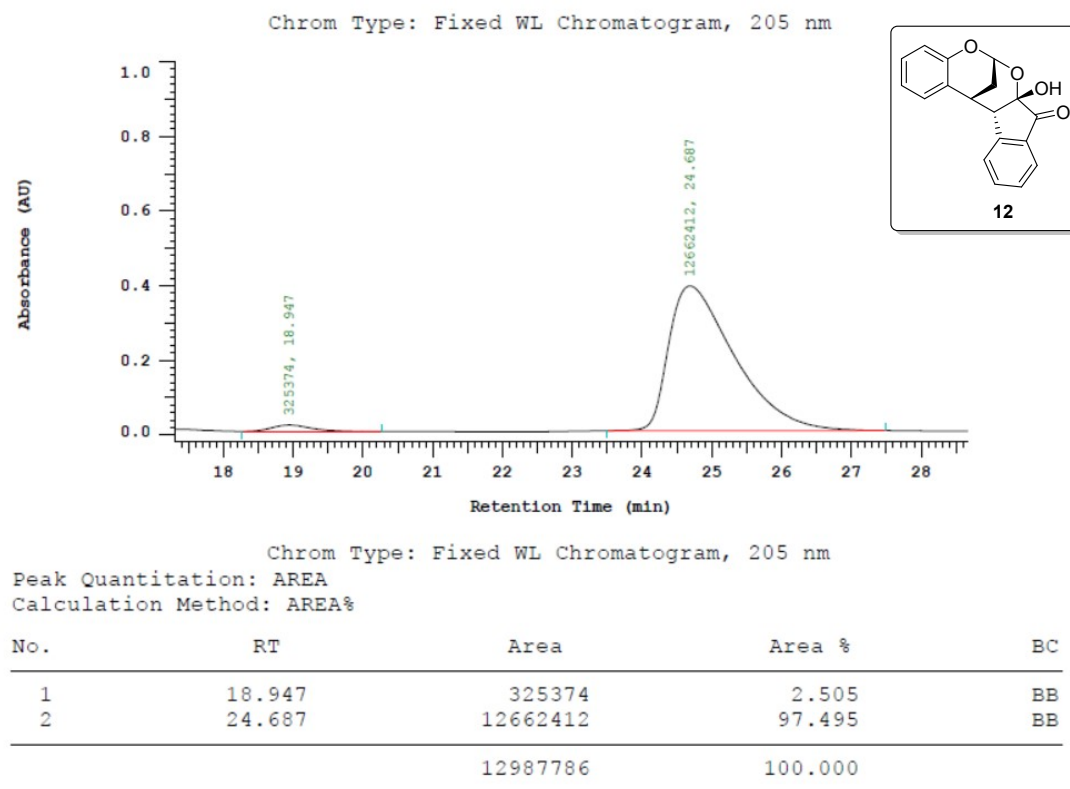

### The $^1\text{H}$ NMR spectrum of 13 (400 MHz, $\text{CDCl}_3$ )

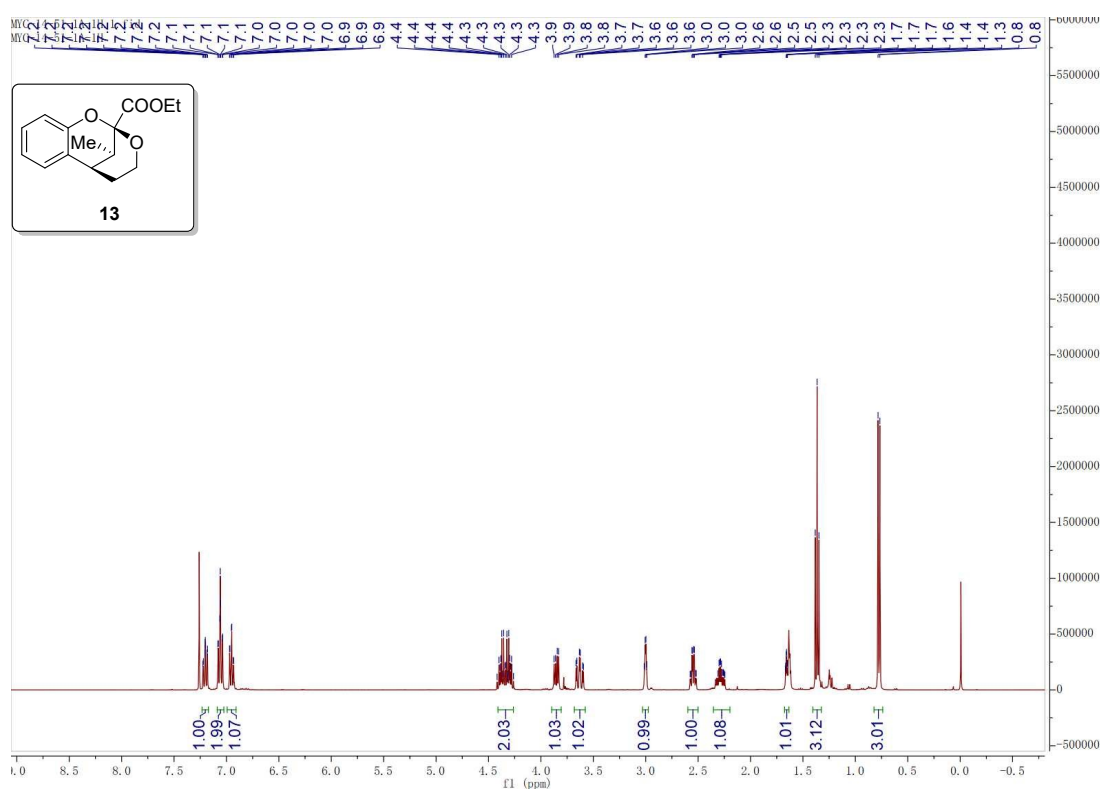

### The $^{13}\text{C}$ NMR spectrum of 13 (100 MHz, $\text{CDCl}_3$ )

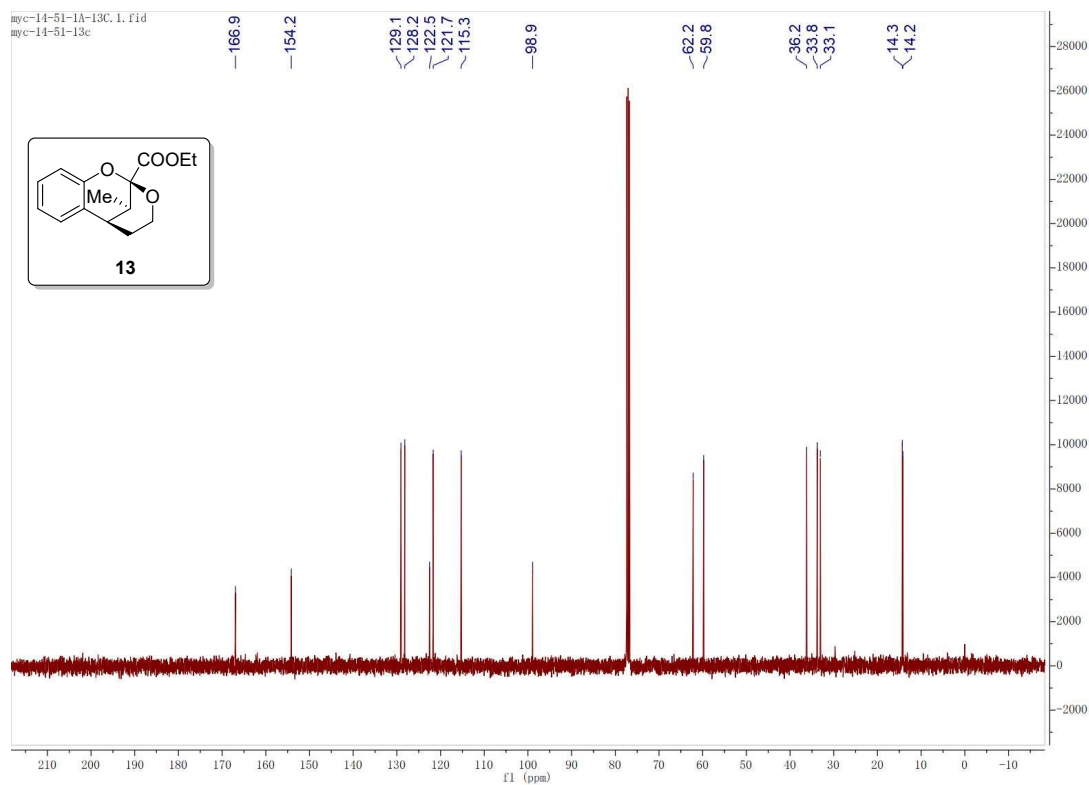

## The HPLC of racemic 13

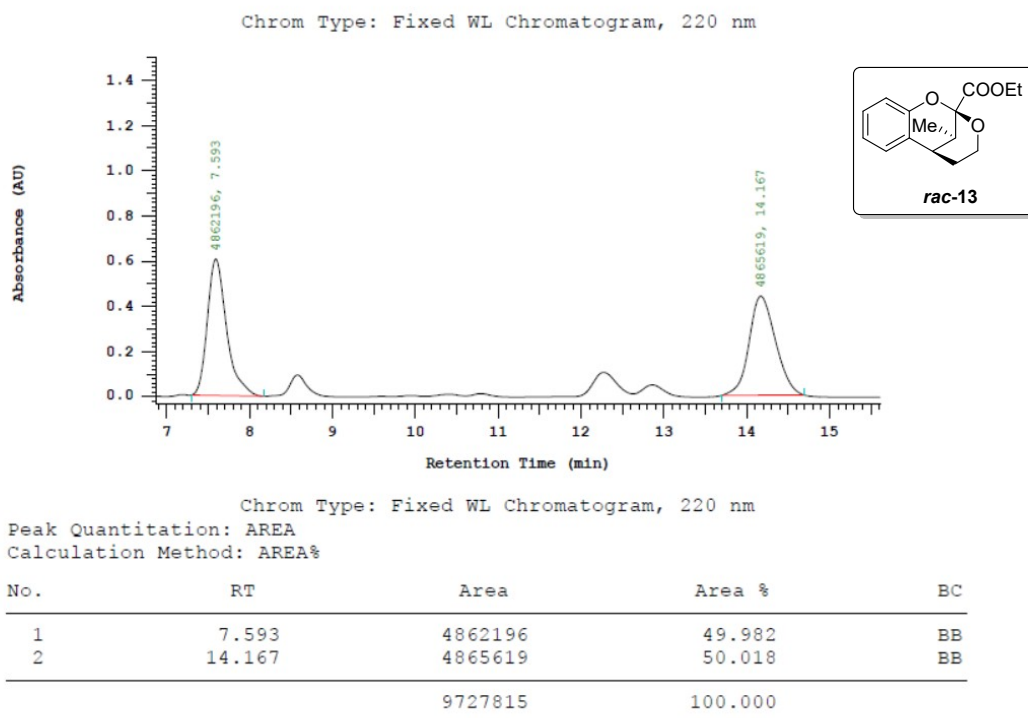

## The HPLC of chiral 13

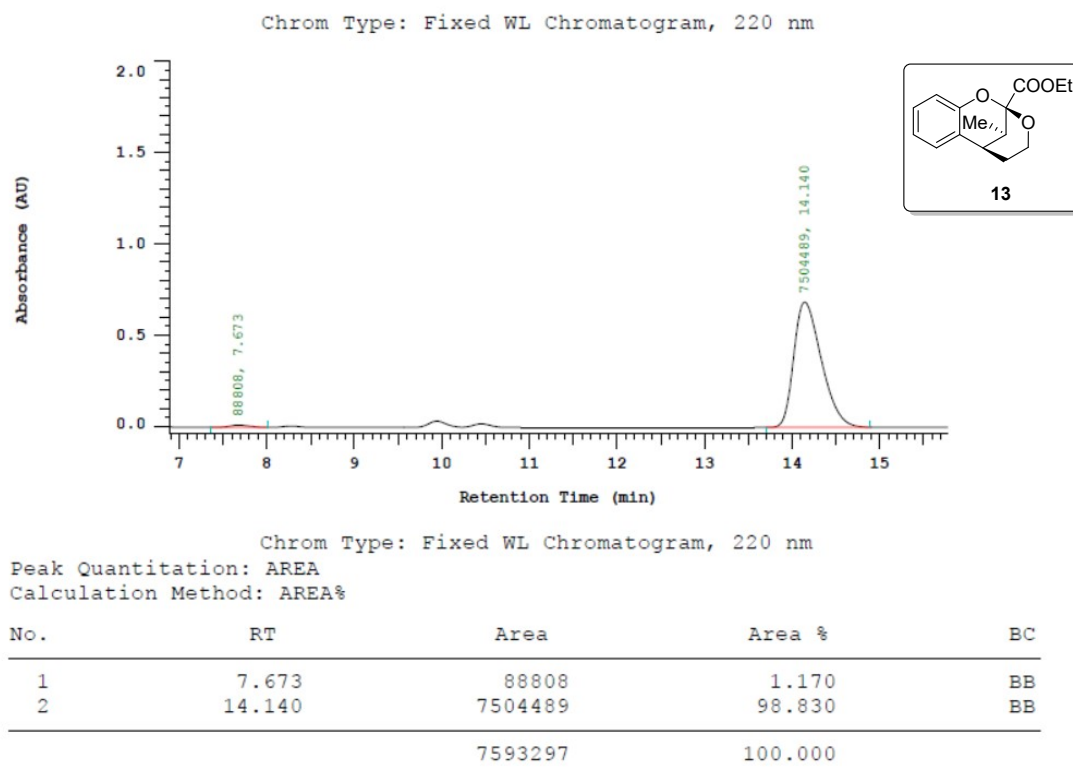

### The $^1\text{H}$ NMR spectrum of 14 (400 MHz, $\text{CDCl}_3$ )

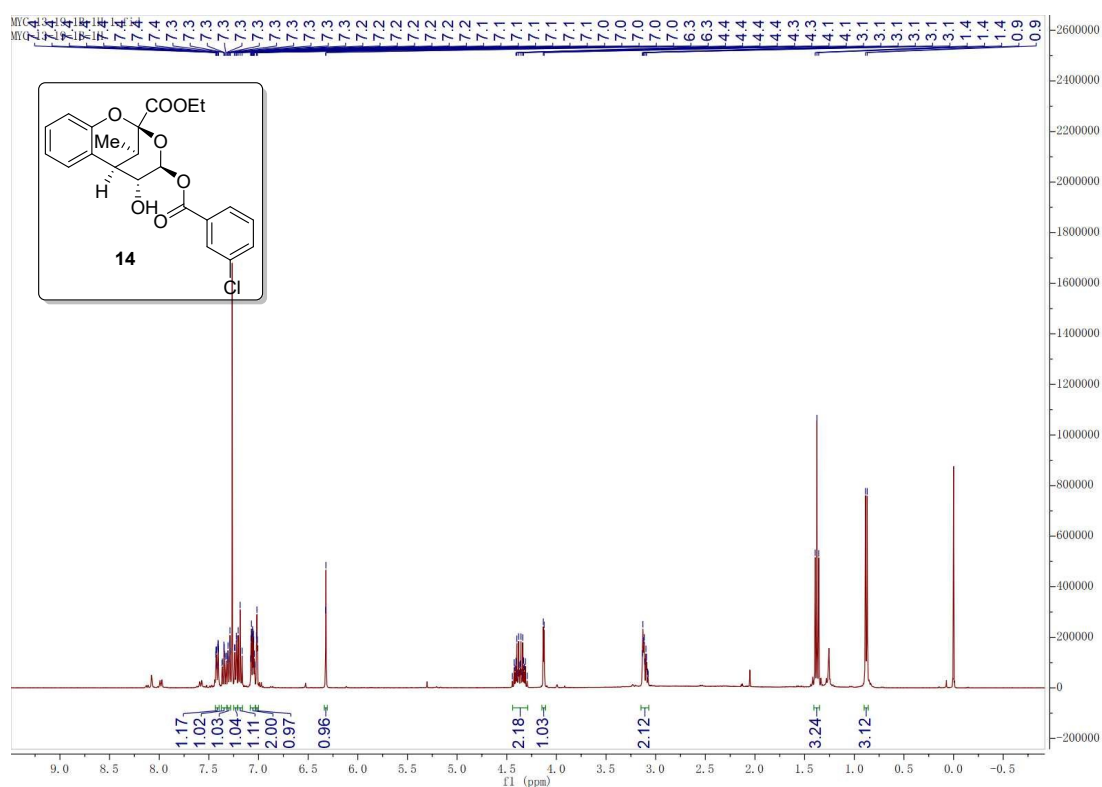

### The $^{13}\text{C}$ NMR spectrum of 14 (100 MHz, $\text{CDCl}_3$ )

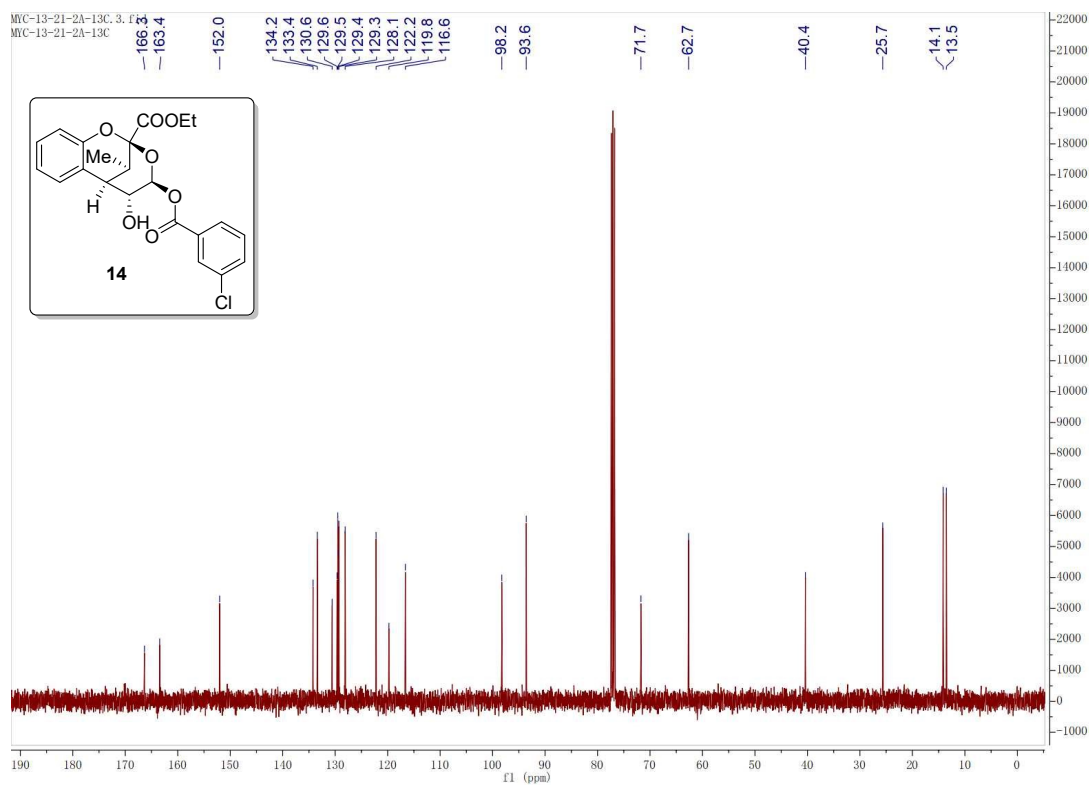

## The HPLC of racemic 14

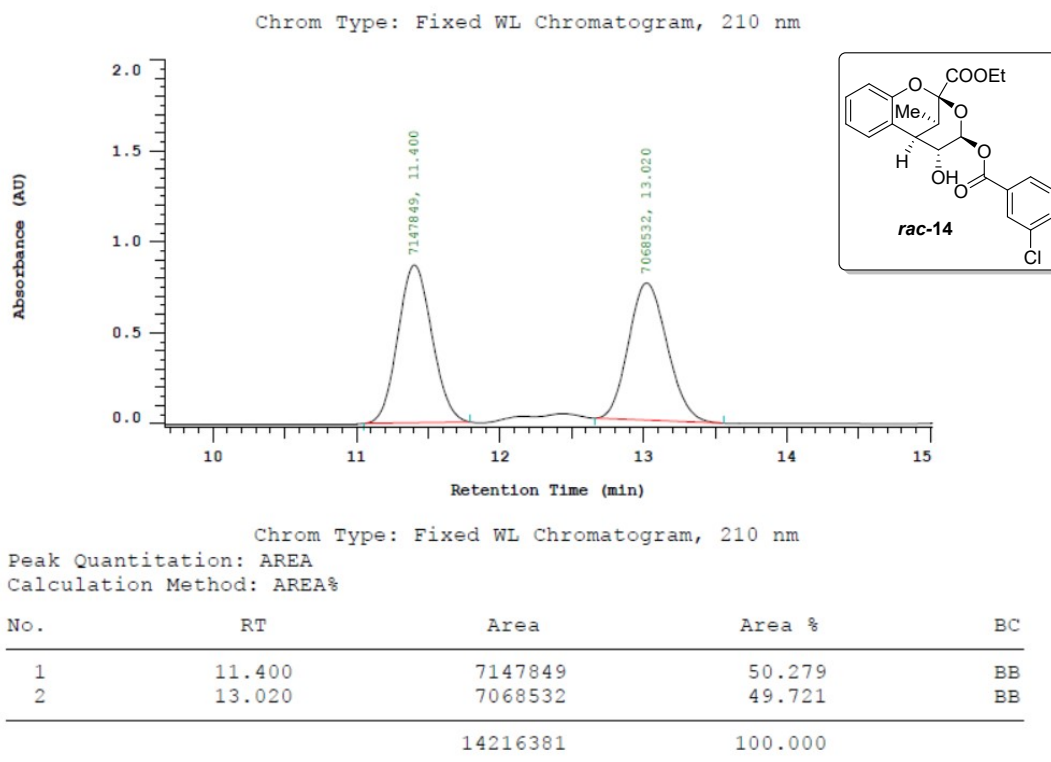

## The HPLC of chiral 14

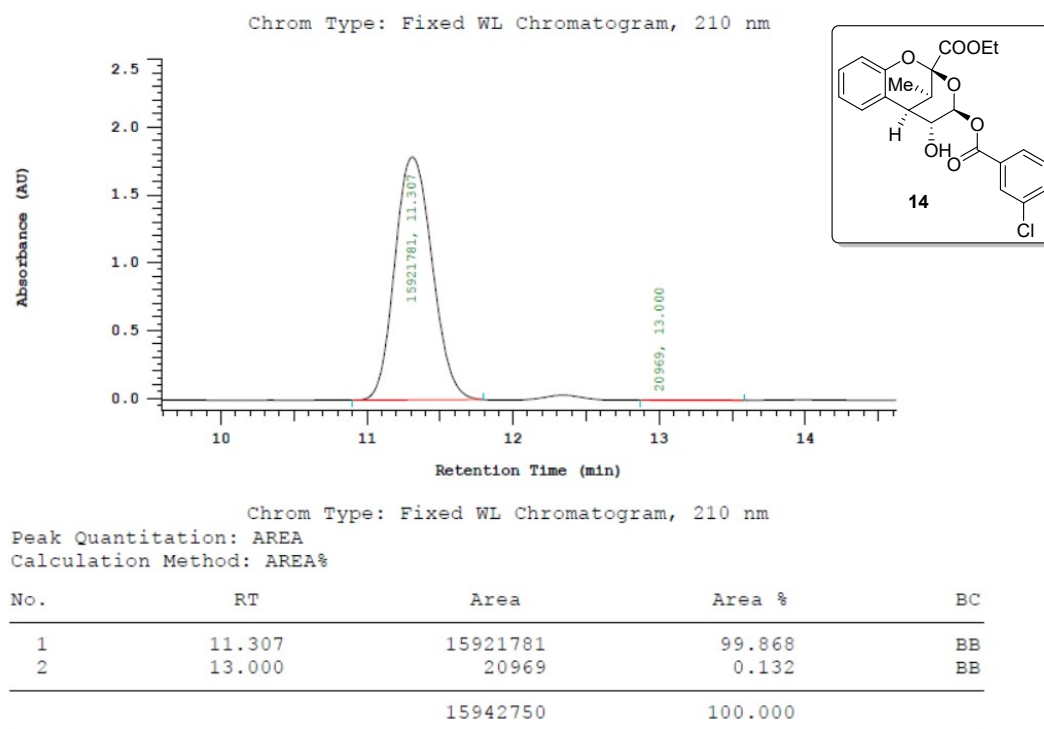

### The $^1\text{H}$ NMR spectrum of *exo*-15 (400 MHz, $\text{CDCl}_3$ )

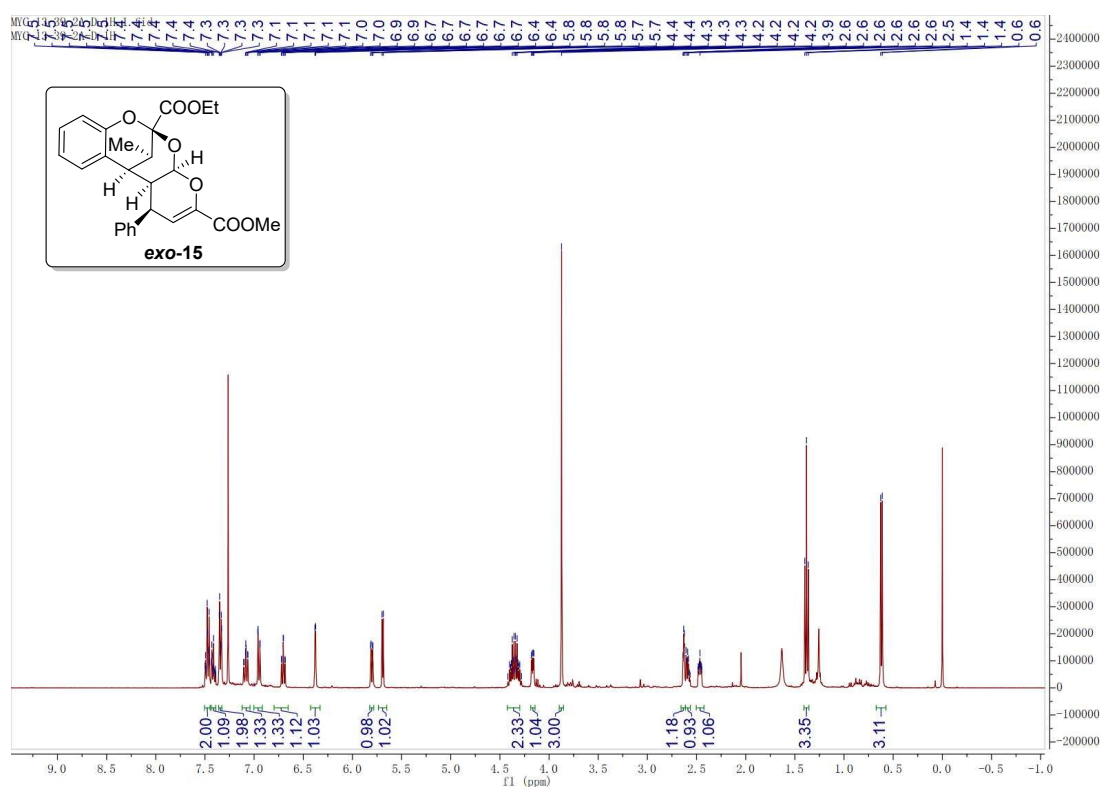

### The $^{13}\text{C}$ NMR spectrum of *exo*-15 (100 MHz, $\text{CDCl}_3$ )

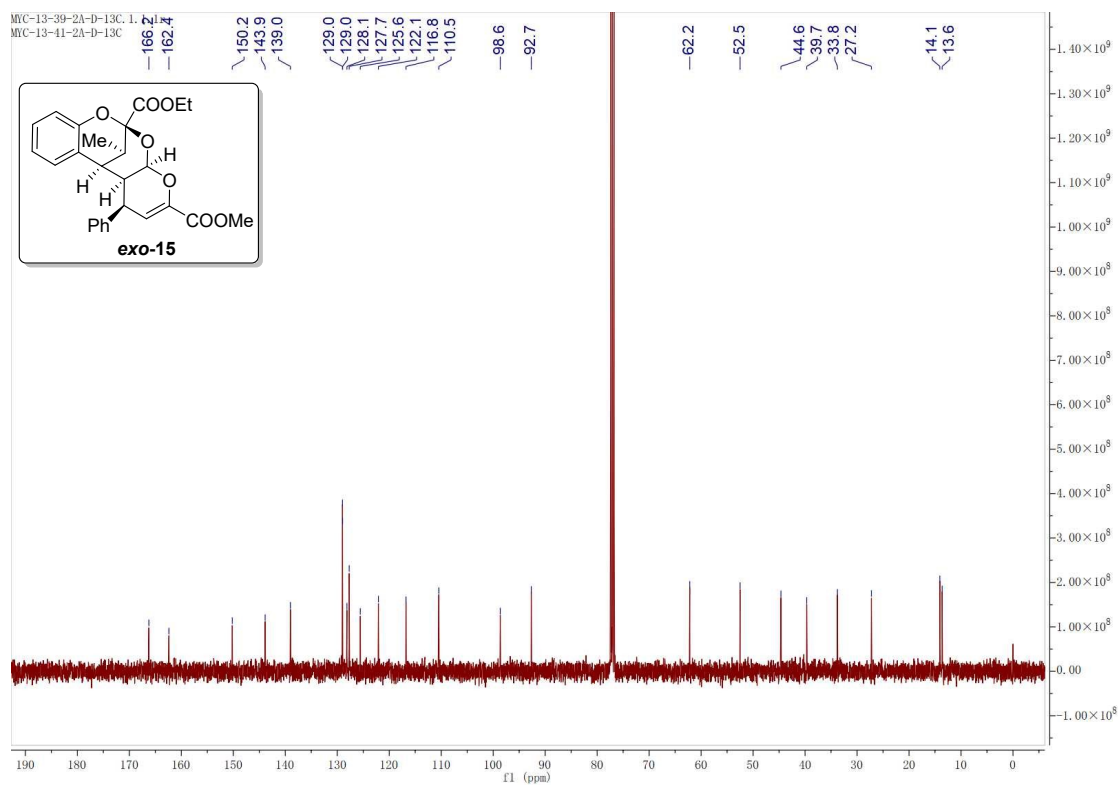

## The NOSEY spectrum of *exo*-15 (400 MHz, CDCl<sub>3</sub>)

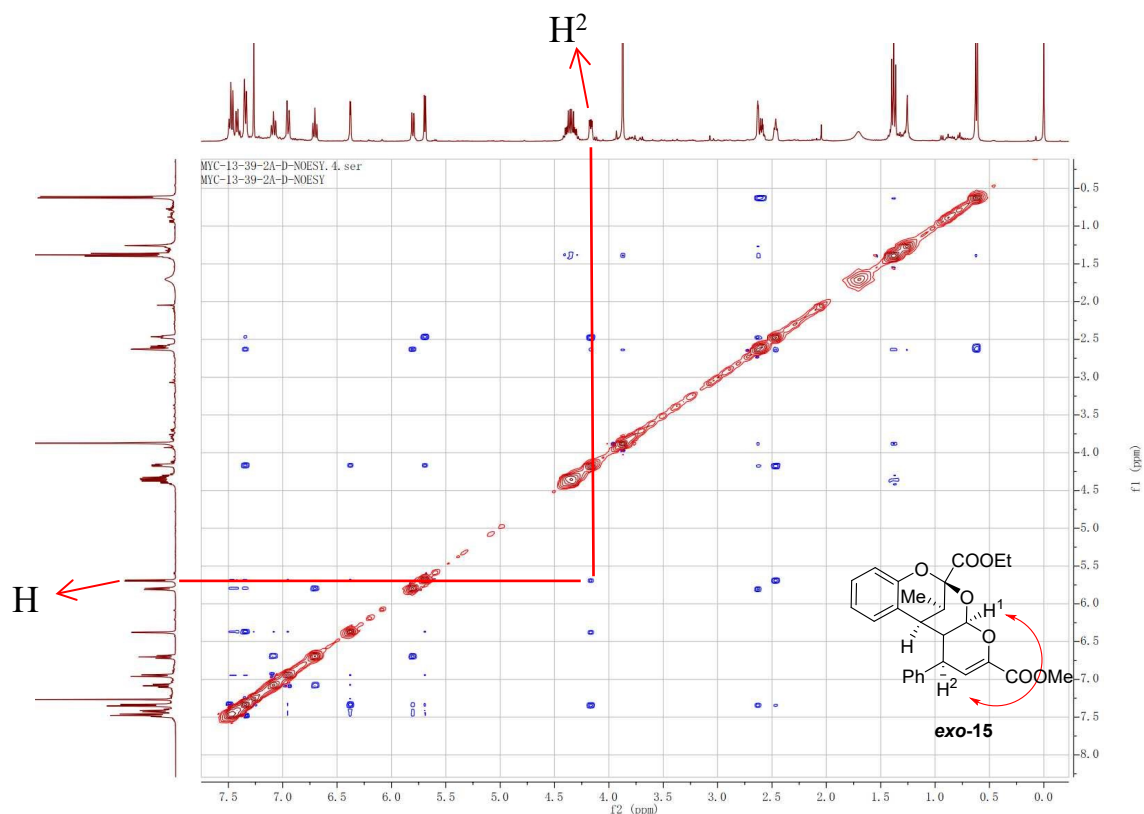

## The HPLC of racemic *exo*-15

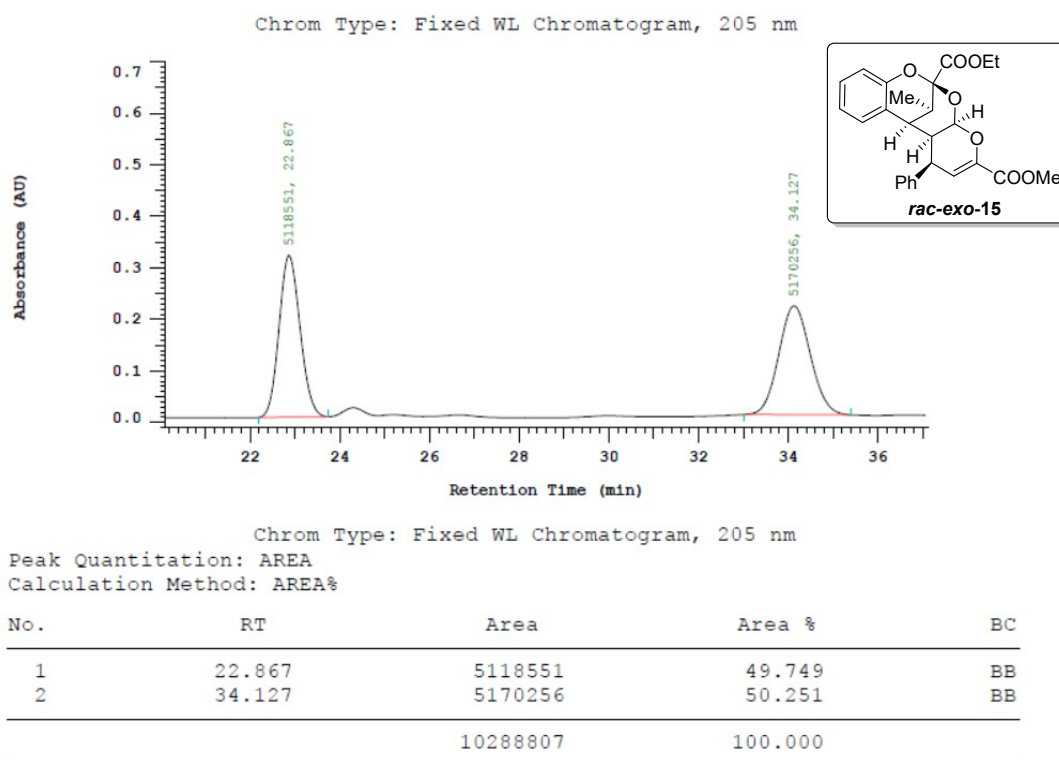

## The HPLC of chiral *exo*-15



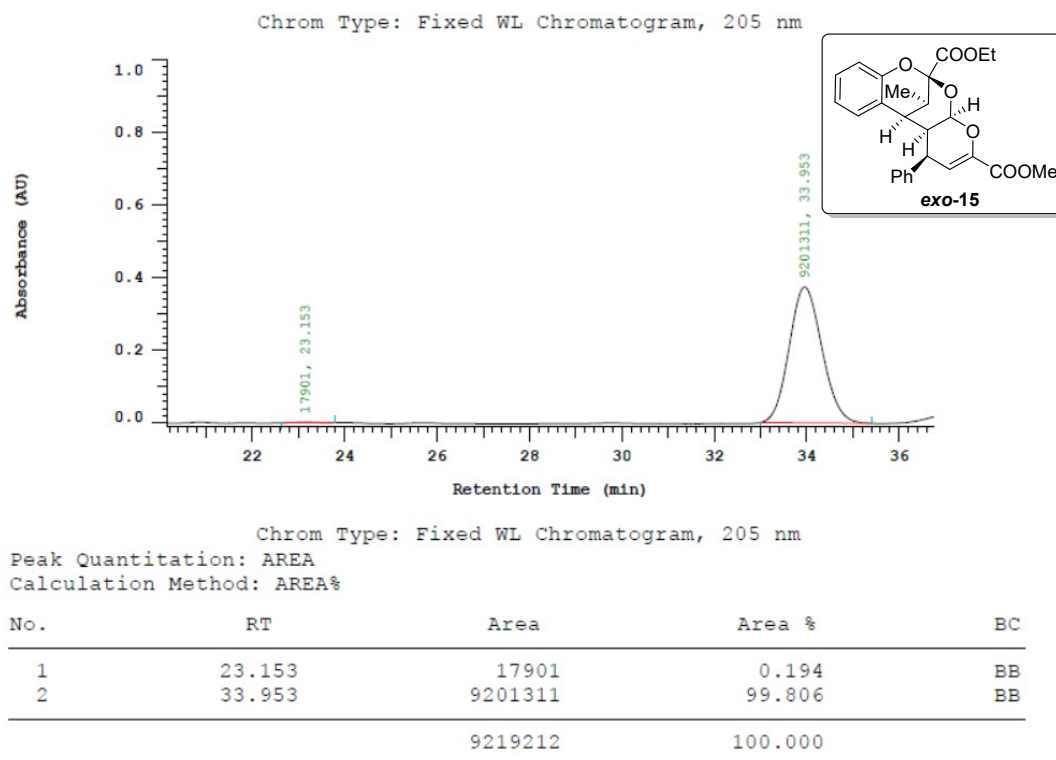

### The $^1\text{H}$ NMR spectrum of *endo-15* (400 MHz, $\text{CDCl}_3$ )

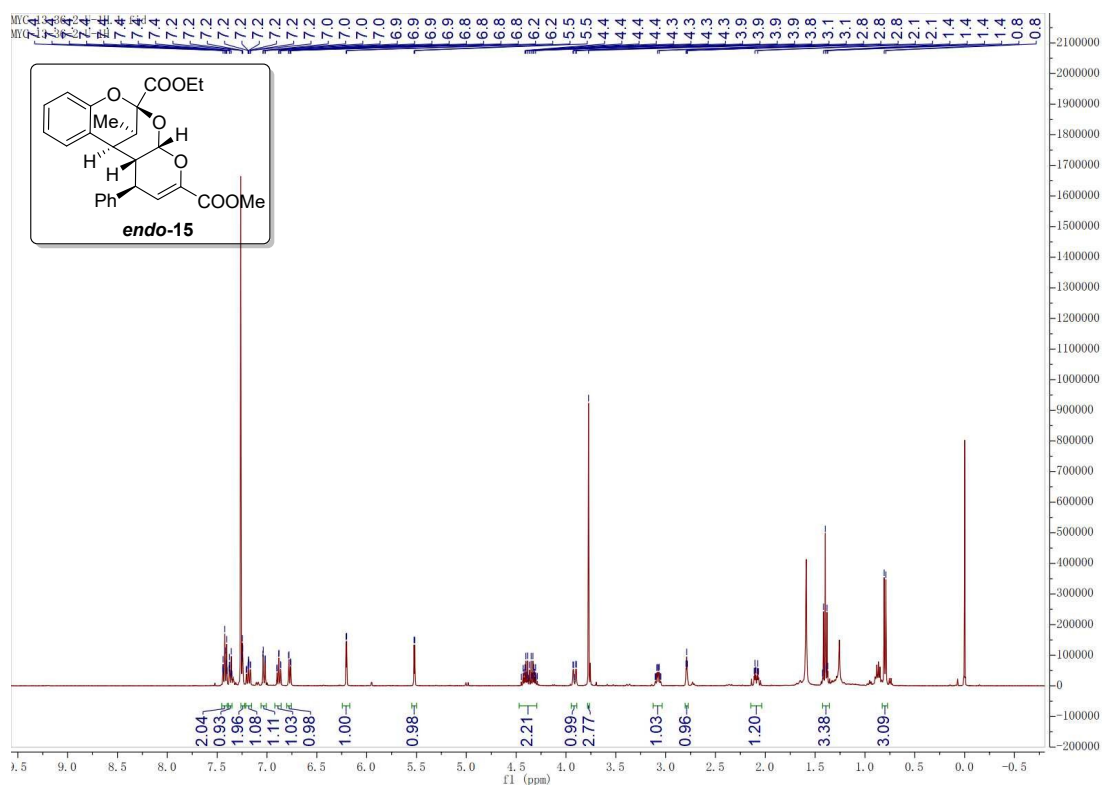

### The $^{13}\text{C}$ NMR spectrum of *endo-15* (100 MHz, $\text{CDCl}_3$ )

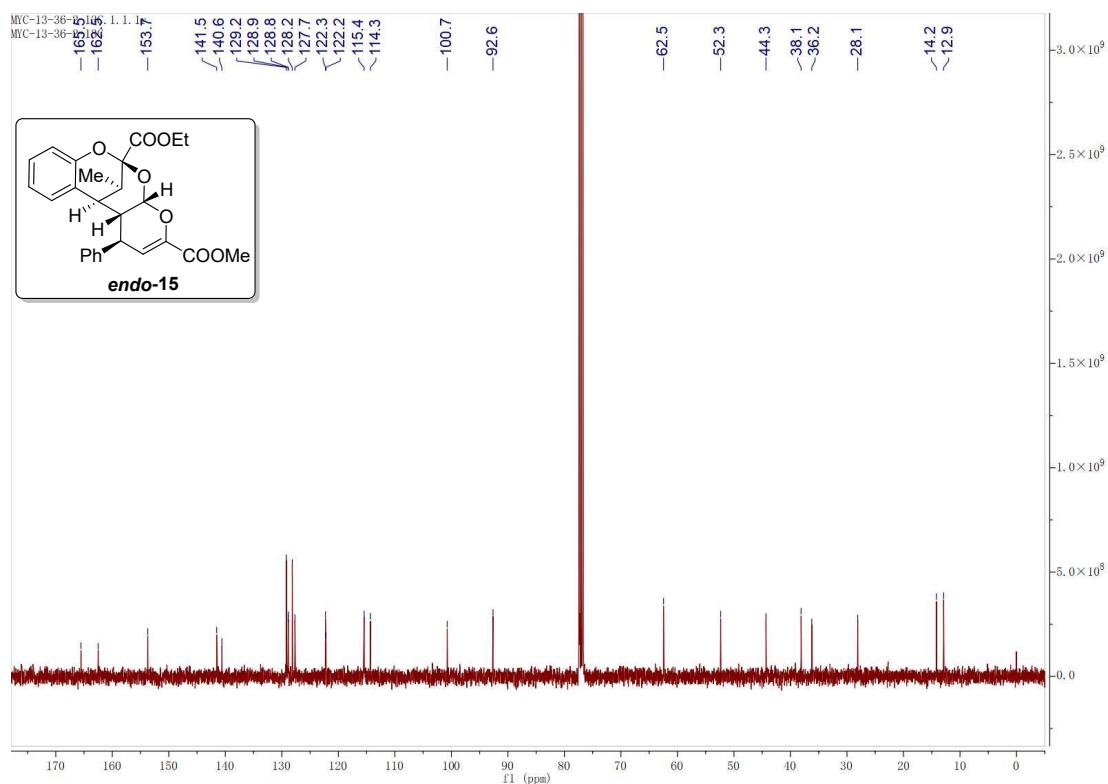

The NOSEY spectrum of *endo-15* (400 MHz, CDCl<sub>3</sub>)

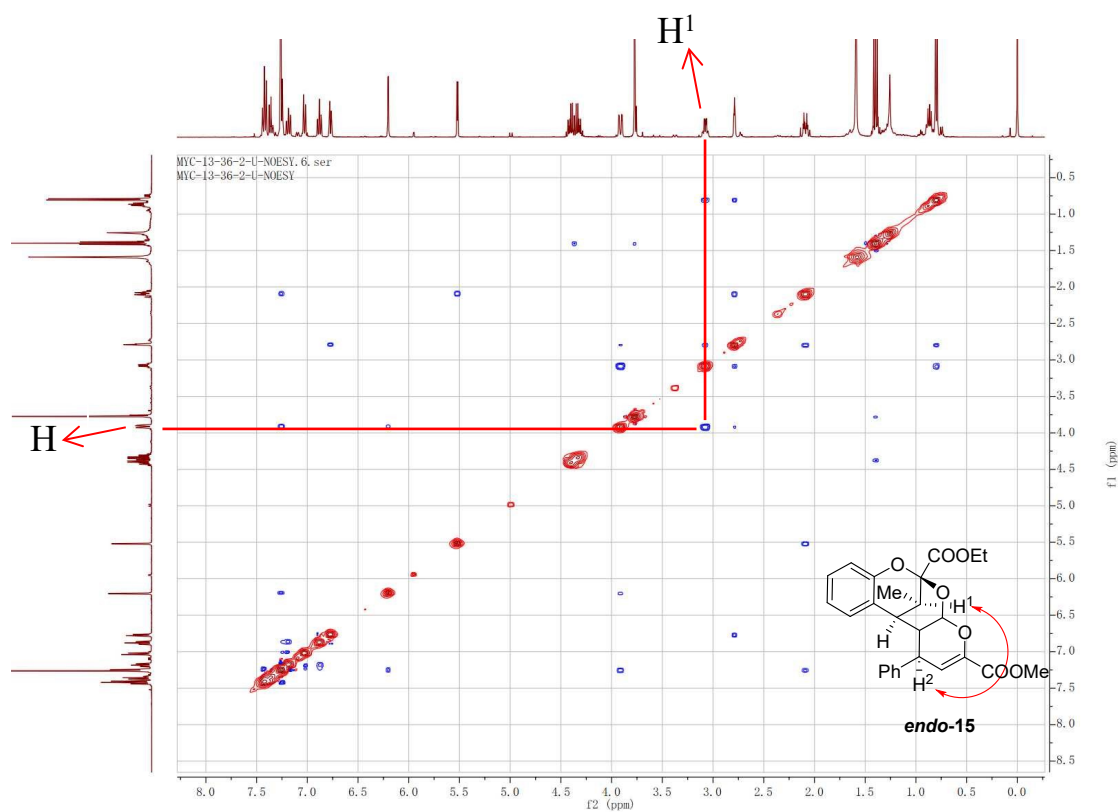

The HPLC of racemic *endo-15*

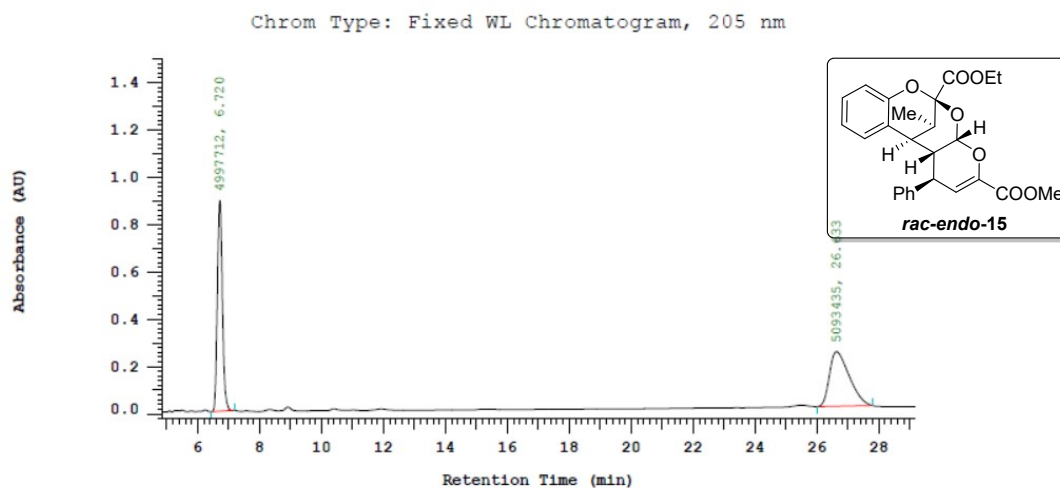

Chrom Type: Fixed WL Chromatogram, 205 nm

Peak Quantitation: AREA  
Calculation Method: AREA%

| No. | RT     | Area     | Area %  | BC |
|-----|--------|----------|---------|----|
| 1   | 6.720  | 4997712  | 49.526  | BB |
| 2   | 26.633 | 5093435  | 50.474  | BB |
|     |        | 10091147 | 100.000 |    |

## The HPLC of chiral *endo-15*

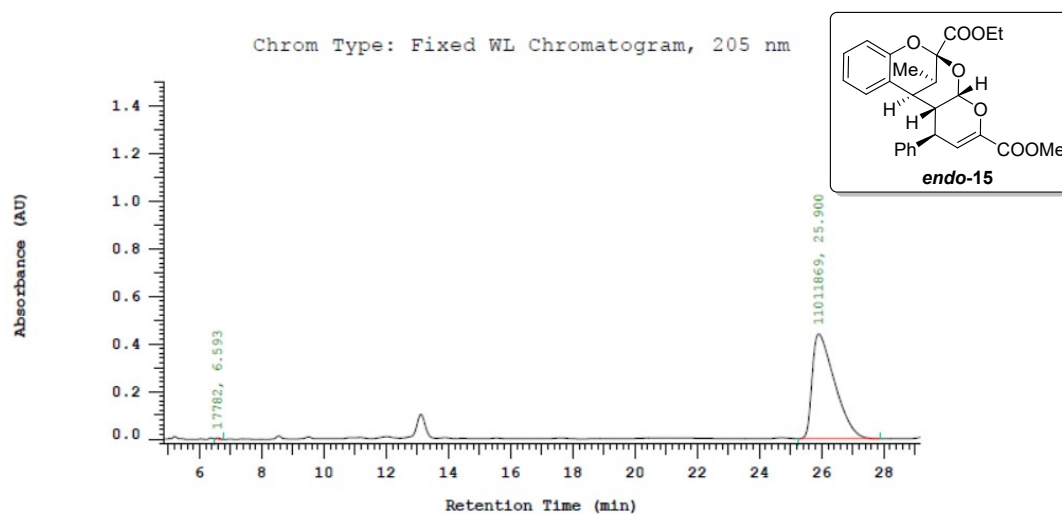

Chrom Type: Fixed WL Chromatogram, 205 nm

Peak Quantitation: AREA  
Calculation Method: AREA%

| No. | RT     | Area     | Area %  | BC |
|-----|--------|----------|---------|----|
| 1   | 6.593  | 17782    | 0.161   | BB |
| 2   | 25.900 | 11011869 | 99.839  | BB |
|     |        | 11029651 | 100.000 |    |

## The <sup>1</sup>H NMR spectrum of 16 (400 MHz, CDCl<sub>3</sub>)

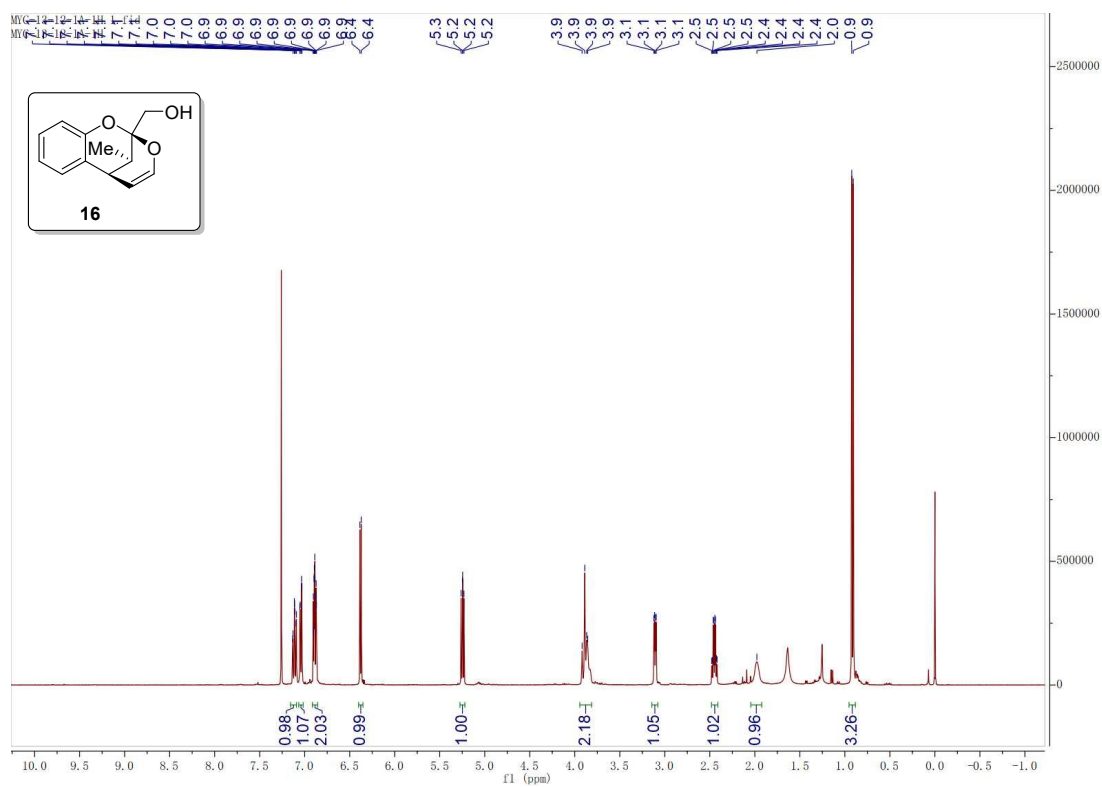

### The $^{13}\text{C}$ NMR spectrum of **16** (100 MHz, $\text{CDCl}_3$ )

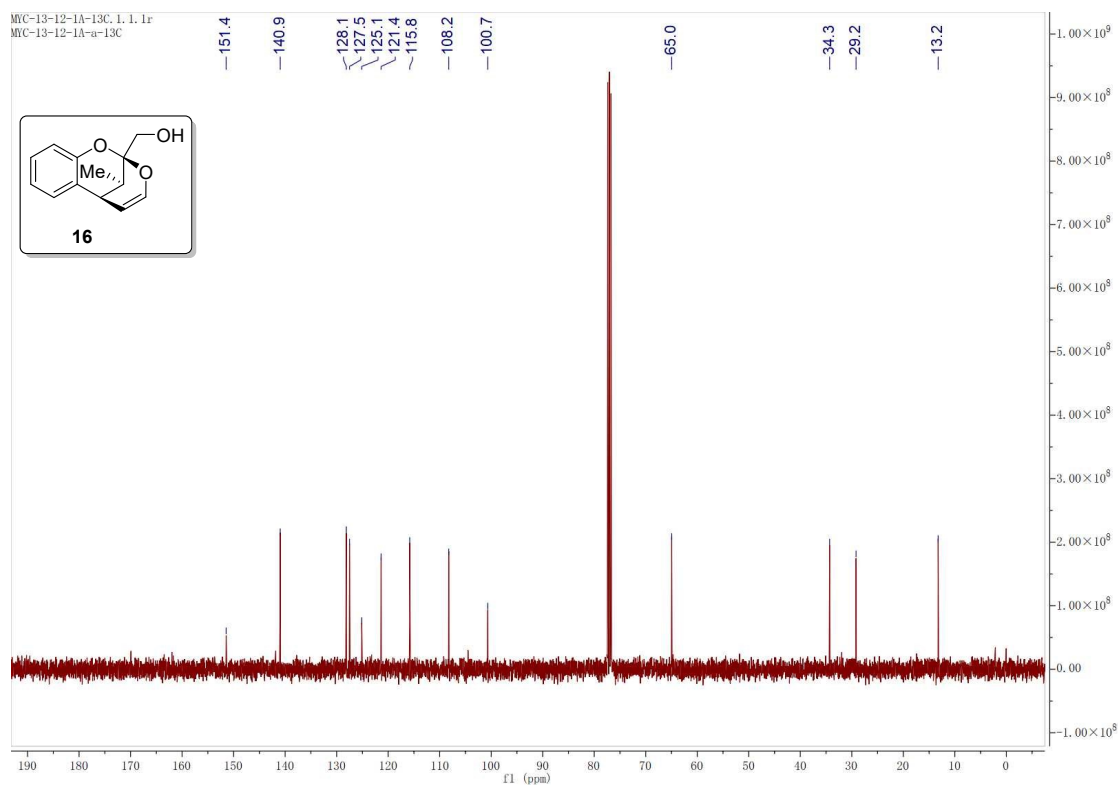

## The HPLC of racemic 16

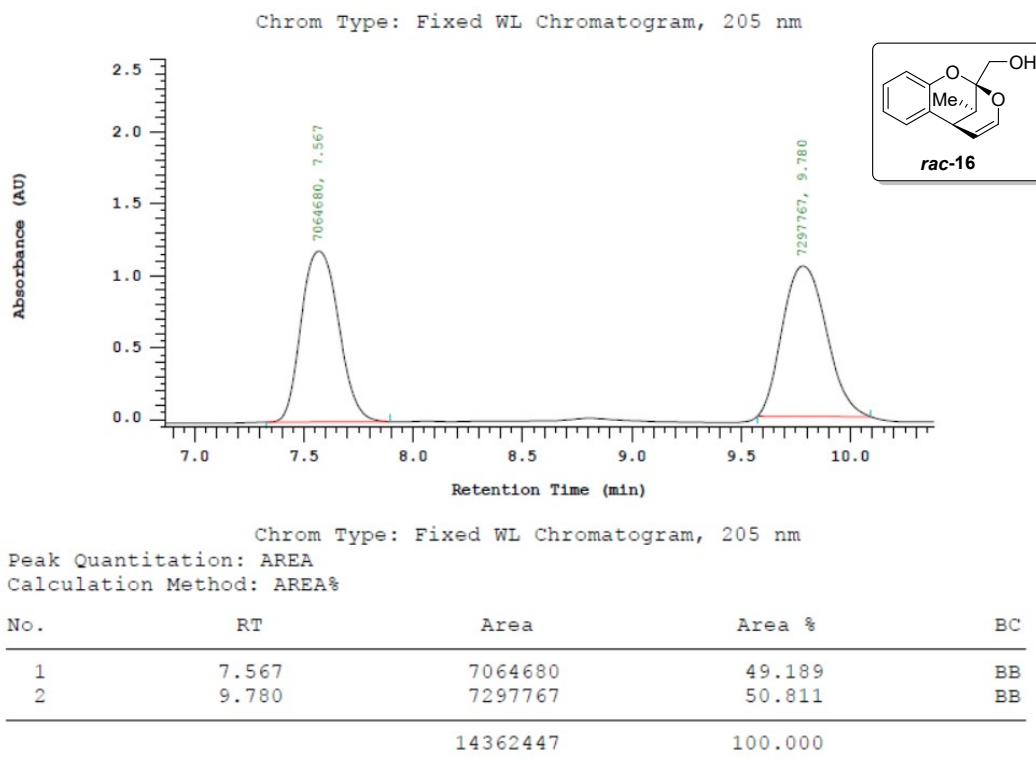

## The HPLC of chiral 16

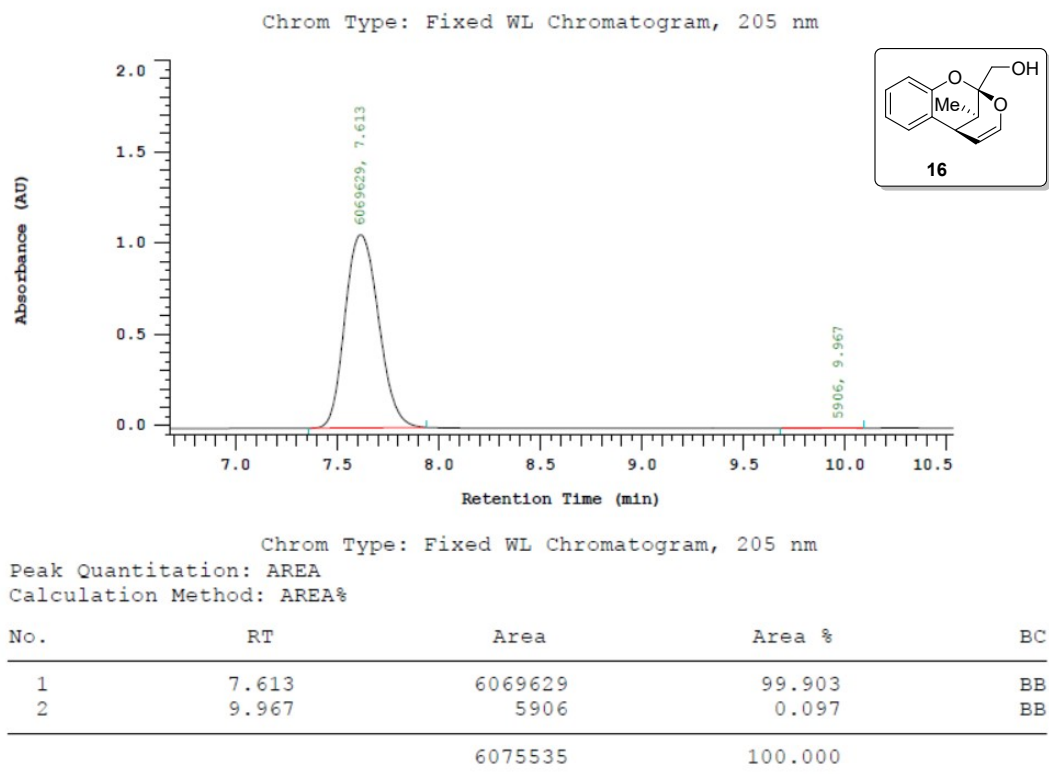

### The $^1\text{H}$ NMR spectrum of 17 (400 MHz, $\text{CDCl}_3$ )

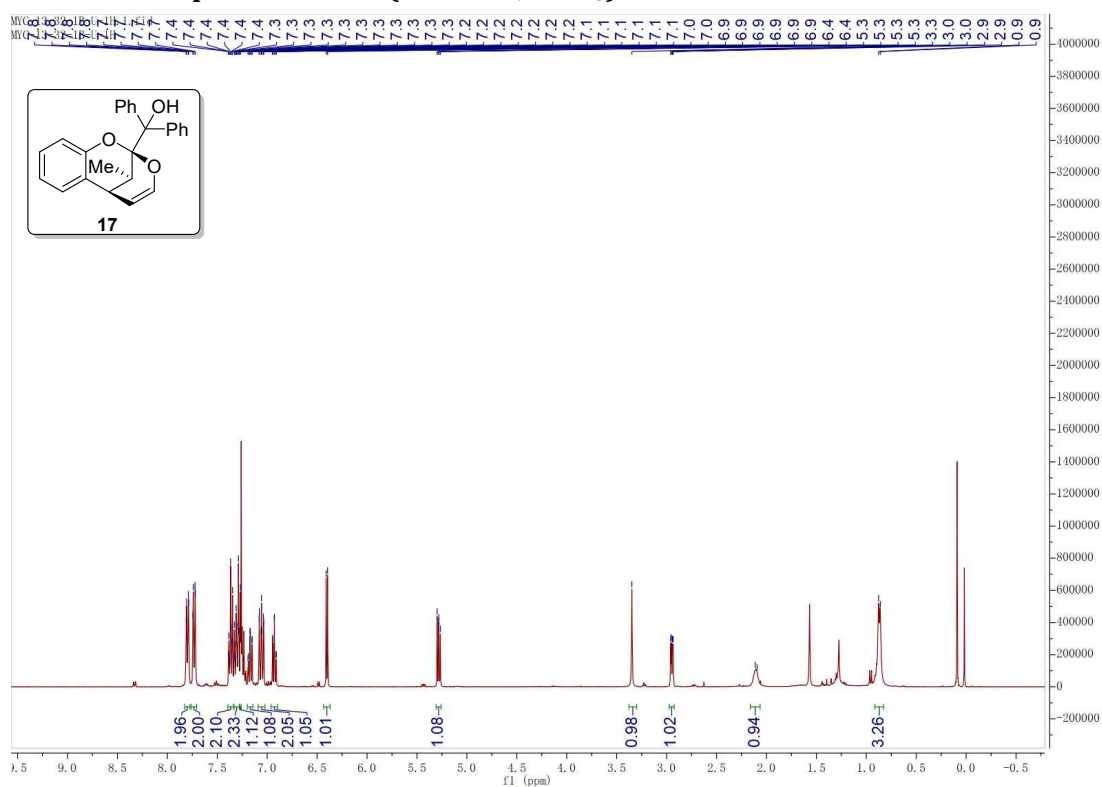

### The $^{13}\text{C}$ NMR spectrum of 17 (100 MHz, $\text{CDCl}_3$ )

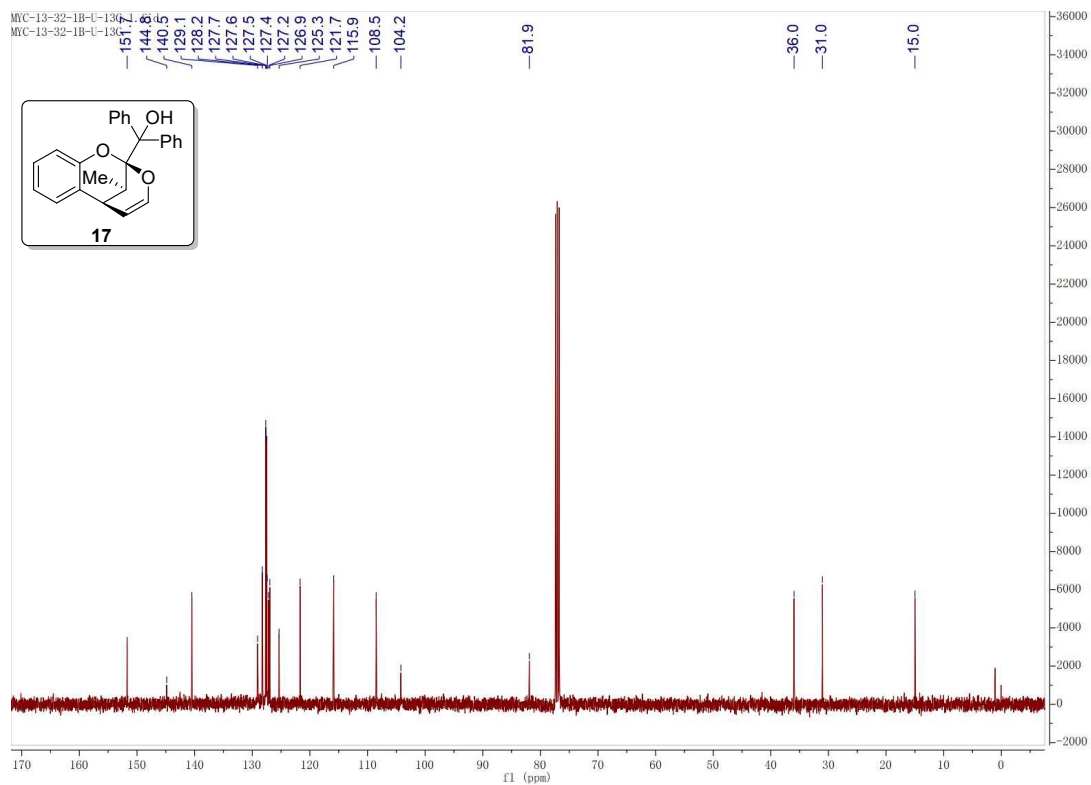

## The HPLC of racemic 17

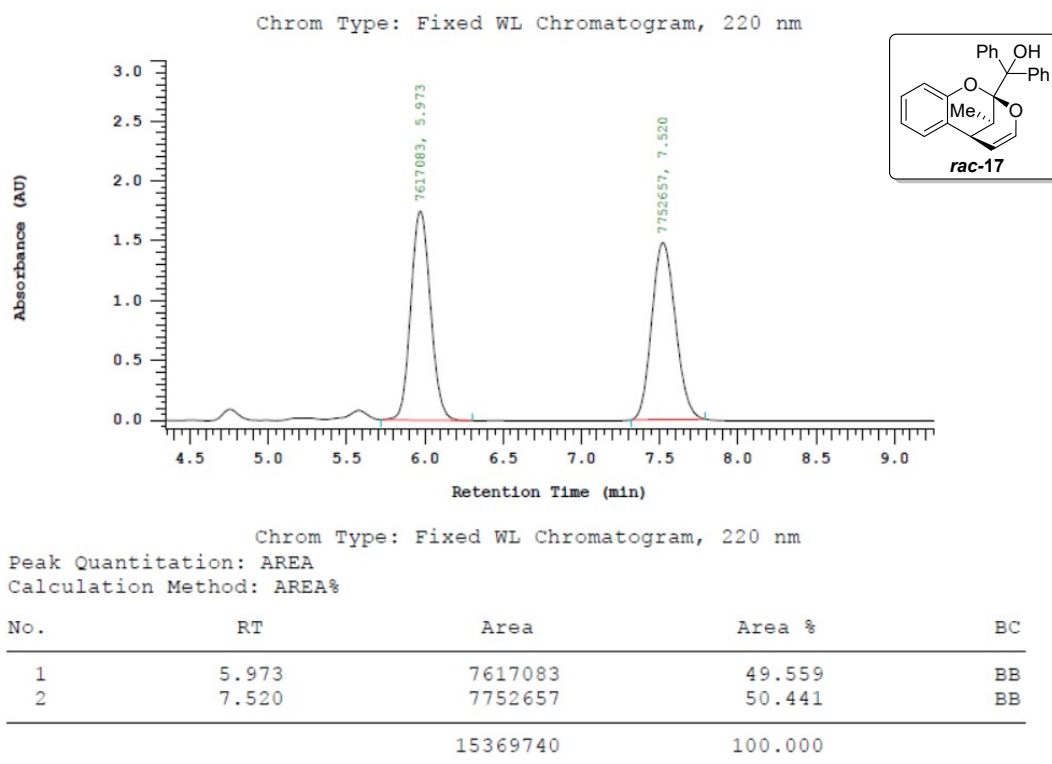

## The HPLC of chiral 17

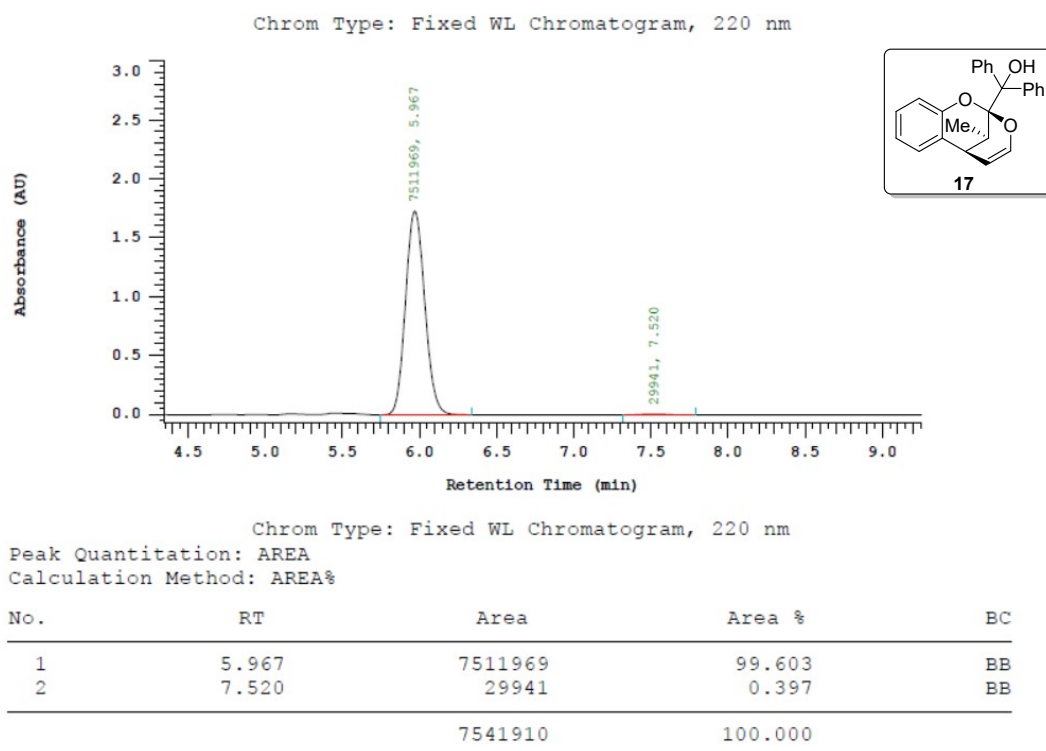

### The $^1\text{H}$ NMR spectrum of 19 (400 MHz, $\text{CDCl}_3$ )

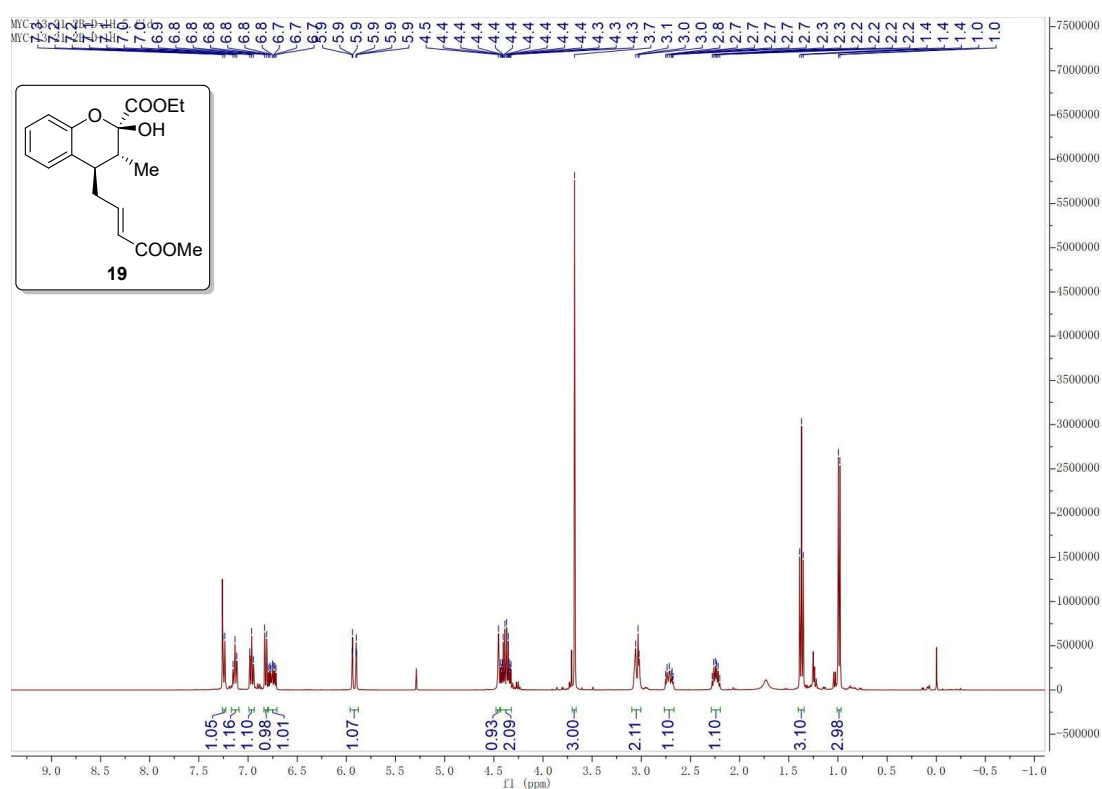

### The $^{13}\text{C}$ NMR spectrum of 19 (100 MHz, $\text{CDCl}_3$ )

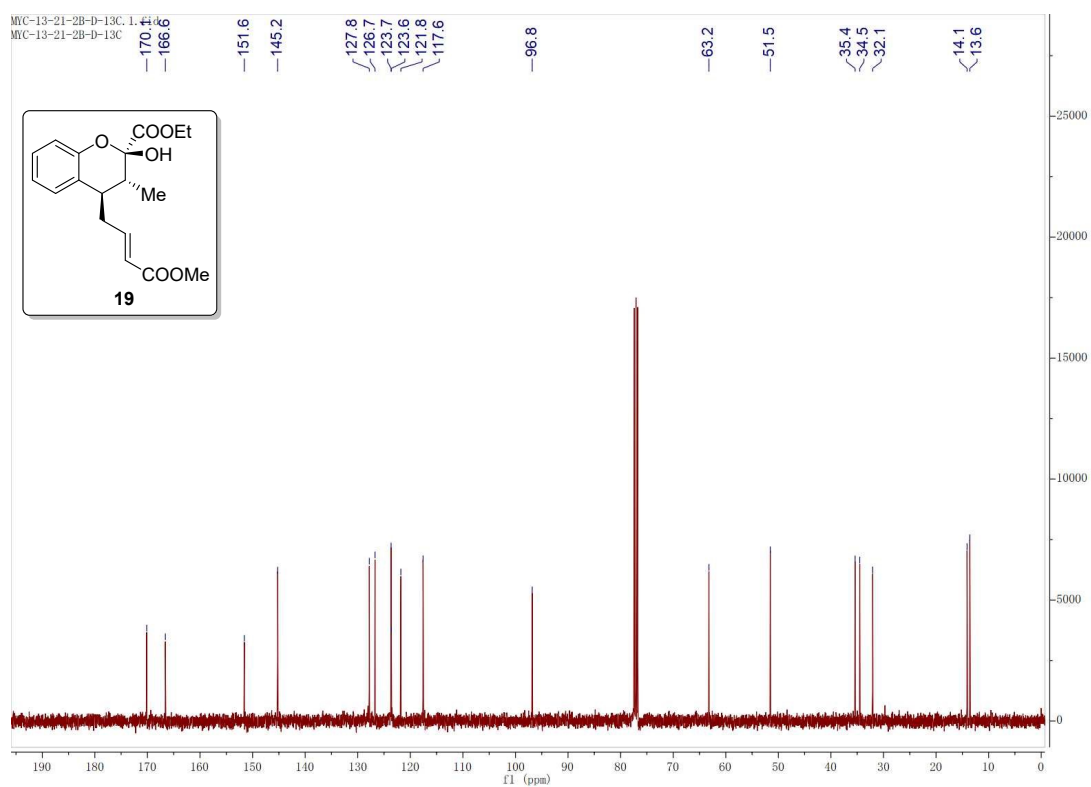



## The HPLC of racemic 19

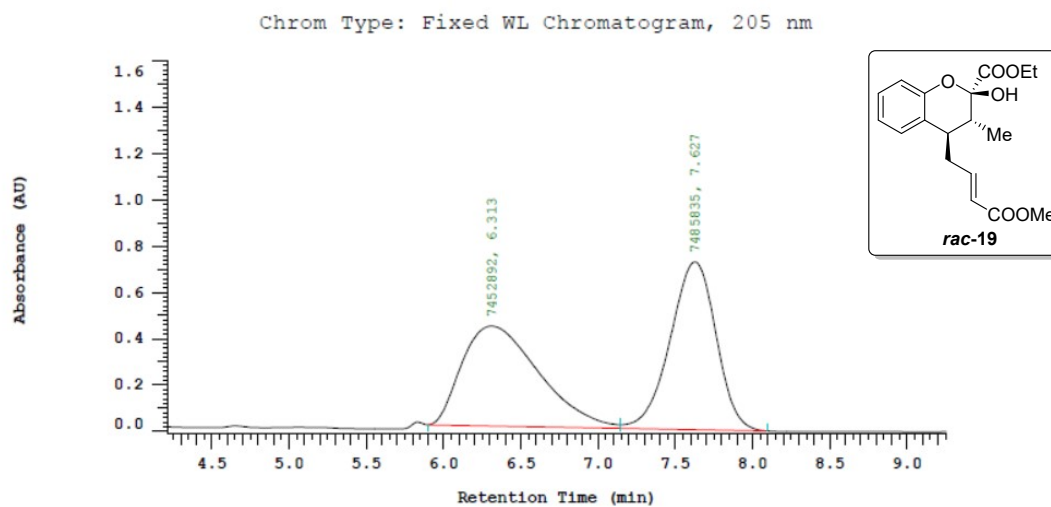

Chrom Type: Fixed WL Chromatogram, 205 nm

Peak Quantitation: AREA  
Calculation Method: AREA%

| No. | RT    | Area     | Area %  | BC |
|-----|-------|----------|---------|----|
| 1   | 6.313 | 7452892  | 49.890  | BV |
| 2   | 7.627 | 7485835  | 50.110  | VB |
|     |       | 14938727 | 100.000 |    |

## The HPLC of chiral 19

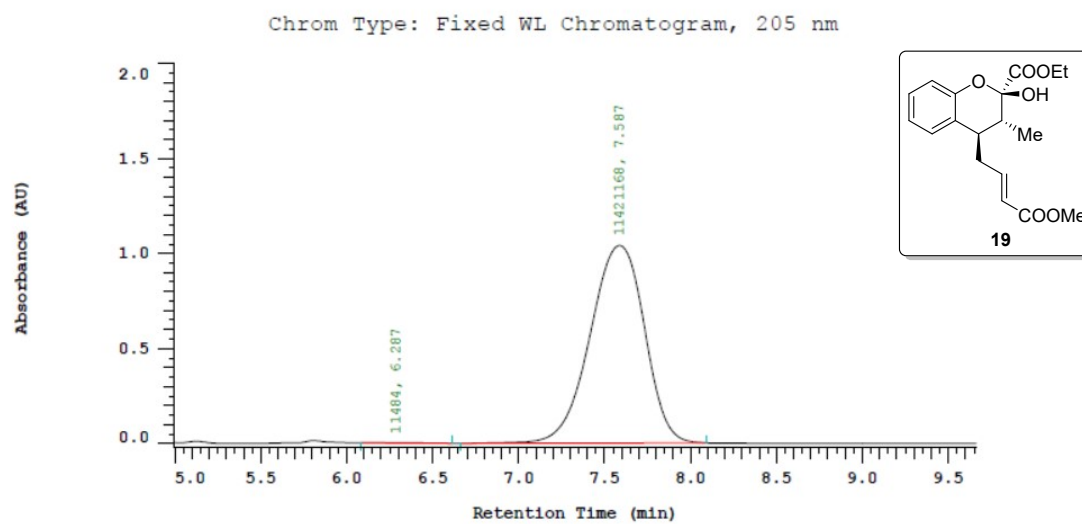

Chrom Type: Fixed WL Chromatogram, 205 nm

Peak Quantitation: AREA  
Calculation Method: AREA%

| No. | RT    | Area     | Area %  | BC |
|-----|-------|----------|---------|----|
| 1   | 6.287 | 11484    | 0.100   | BB |
| 2   | 7.587 | 11421168 | 99.900  | BB |
|     |       | 11432652 | 100.000 |    |

### The $^1\text{H}$ NMR spectrum of 20 (400 MHz, $\text{CDCl}_3$ )

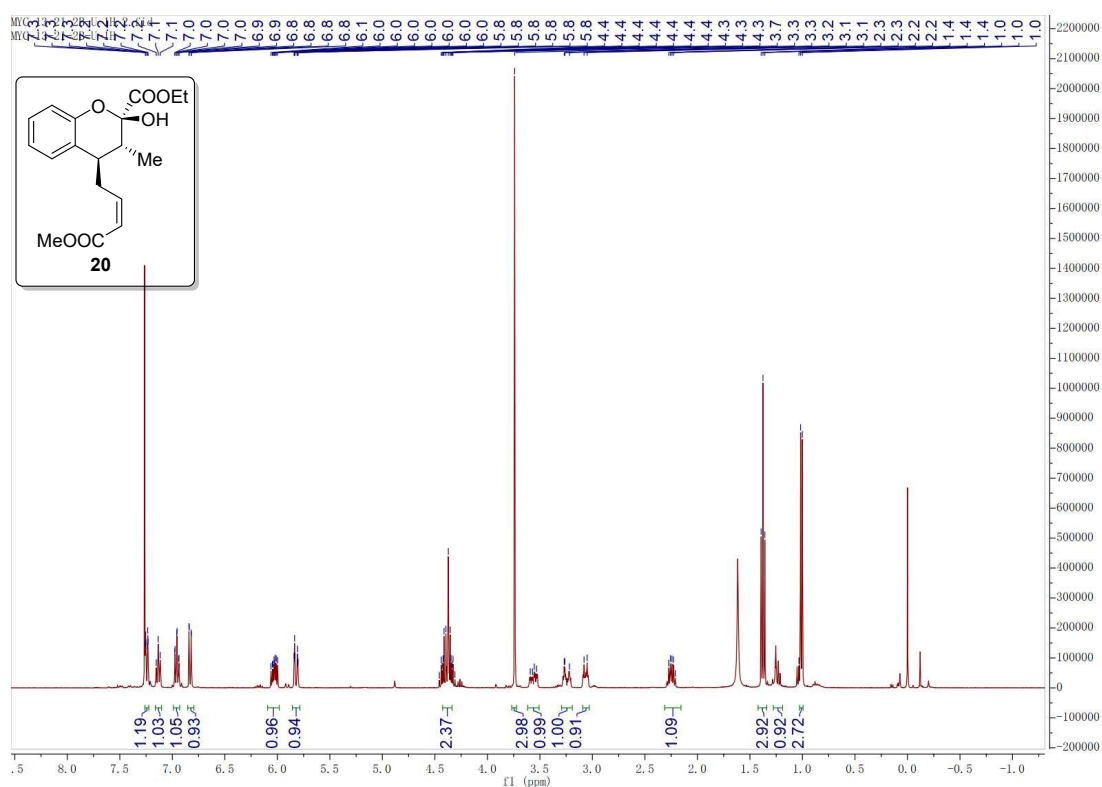

### The $^{13}\text{C}$ NMR spectrum of 20 (100 MHz, $\text{CDCl}_3$ )

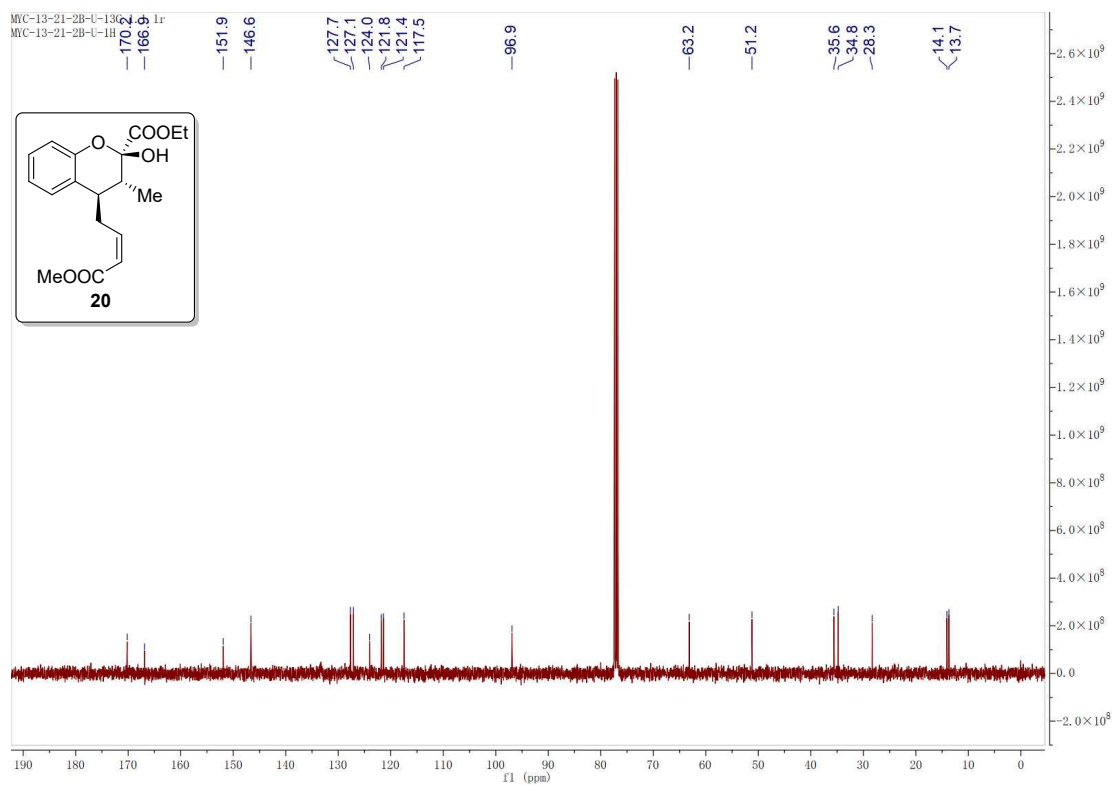

## The HPLC of racemic 20

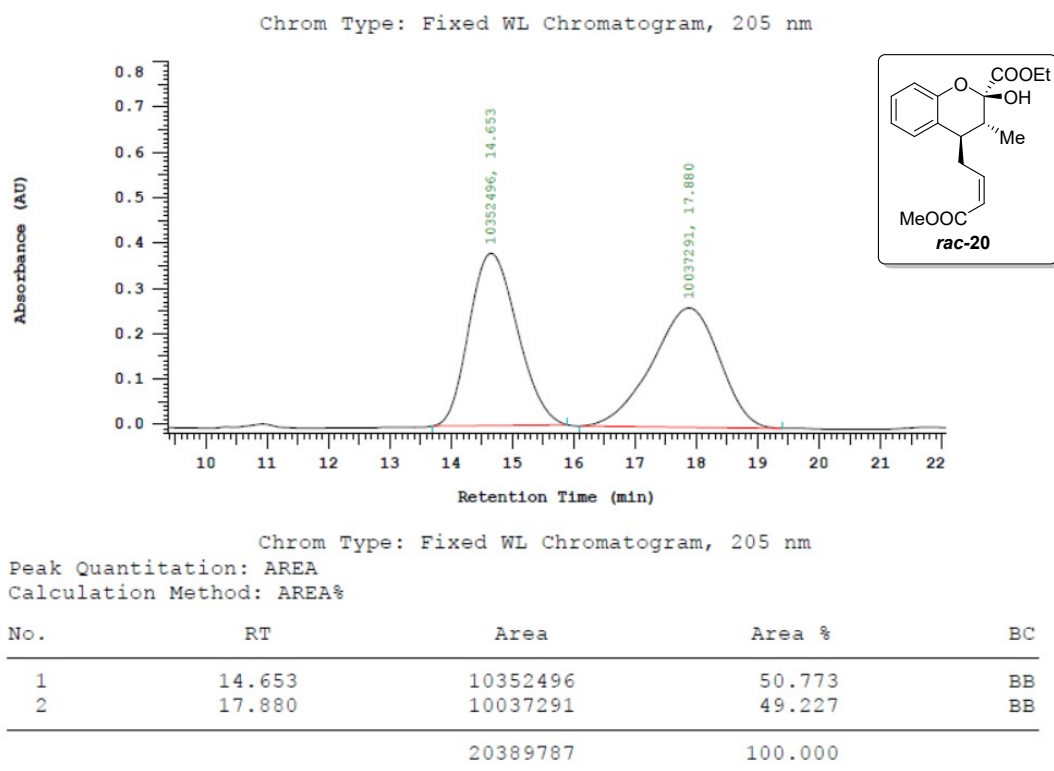

## The HPLC of chiral 20

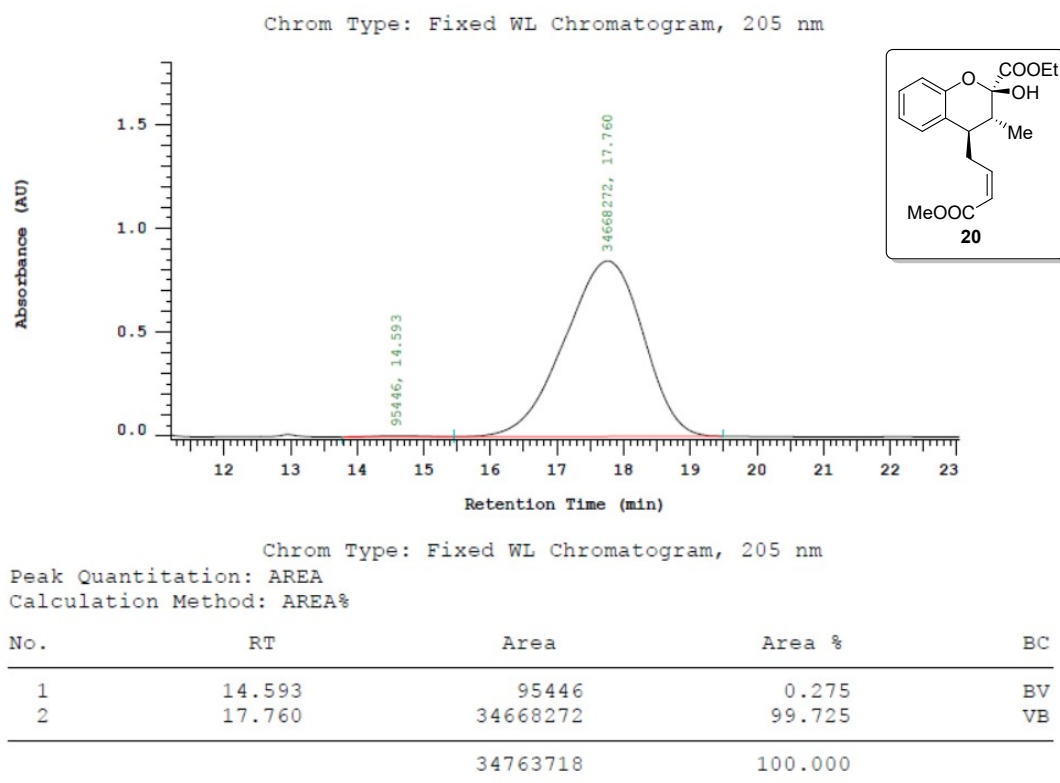

### The $^1\text{H}$ NMR spectrum of 22a (400 MHz, $\text{CDCl}_3$ )

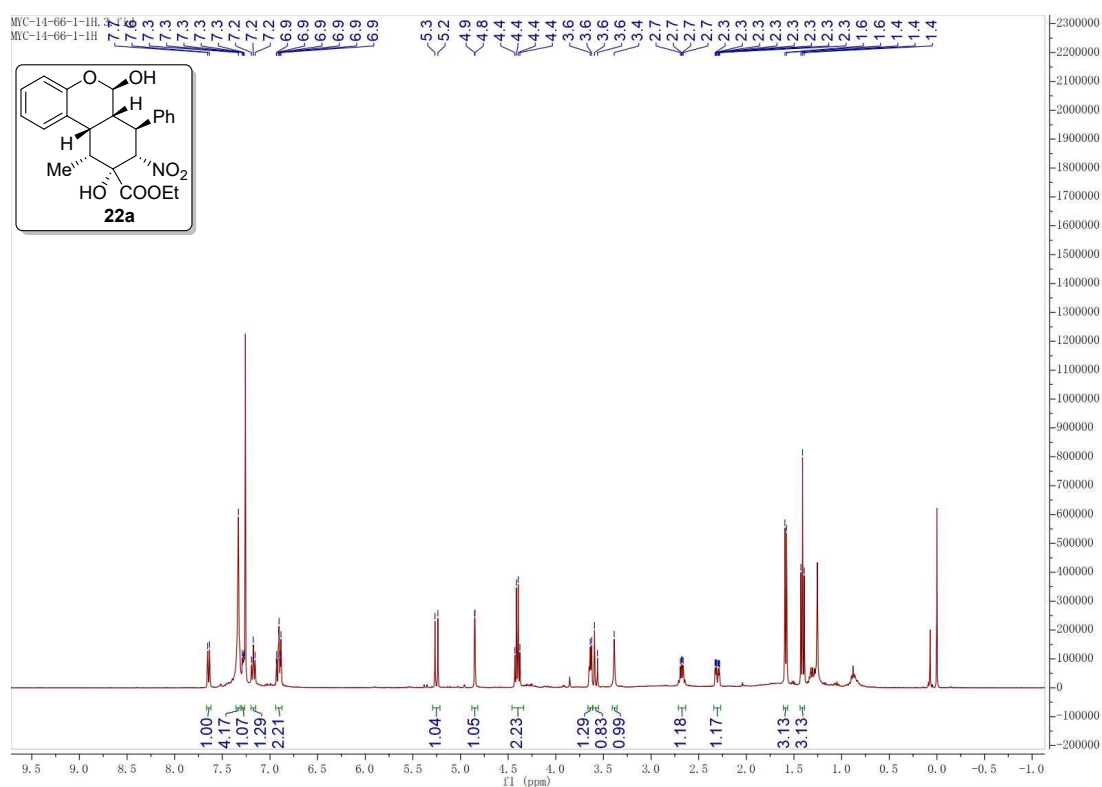

### The $^{13}\text{C}$ NMR spectrum of 22a (100 MHz, $\text{CDCl}_3$ )

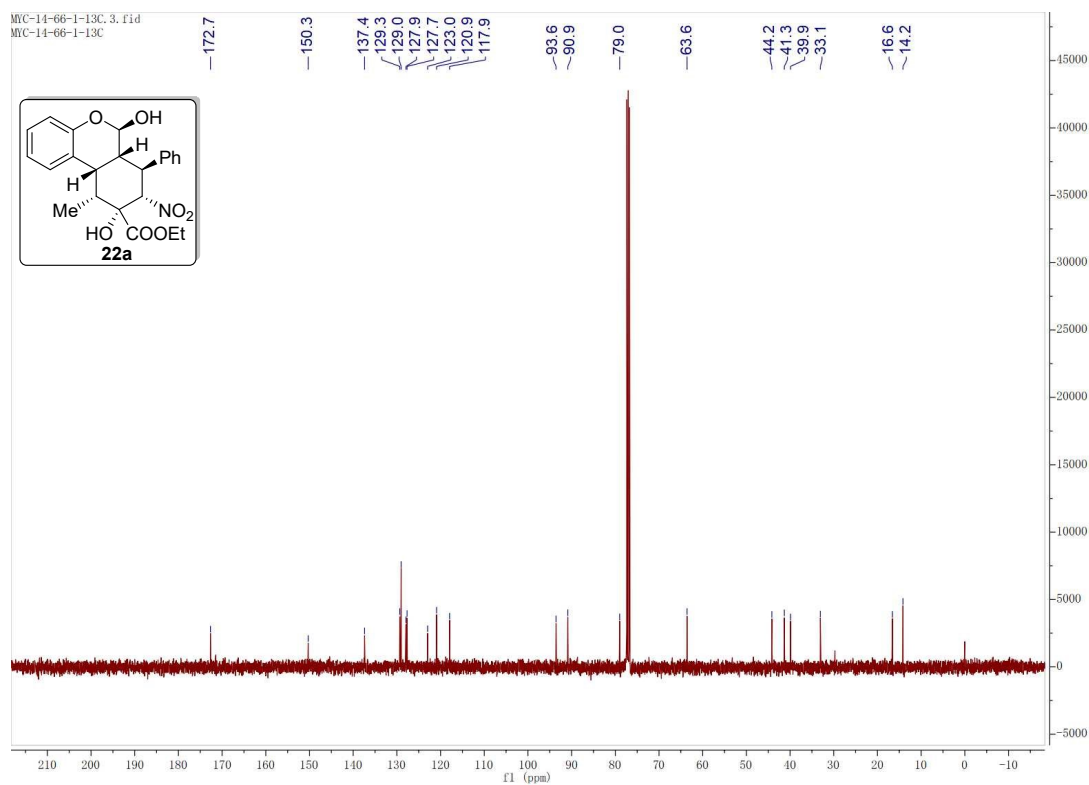

The NOSEY spectrum of 22a (400 MHz, CDCl<sub>3</sub>)

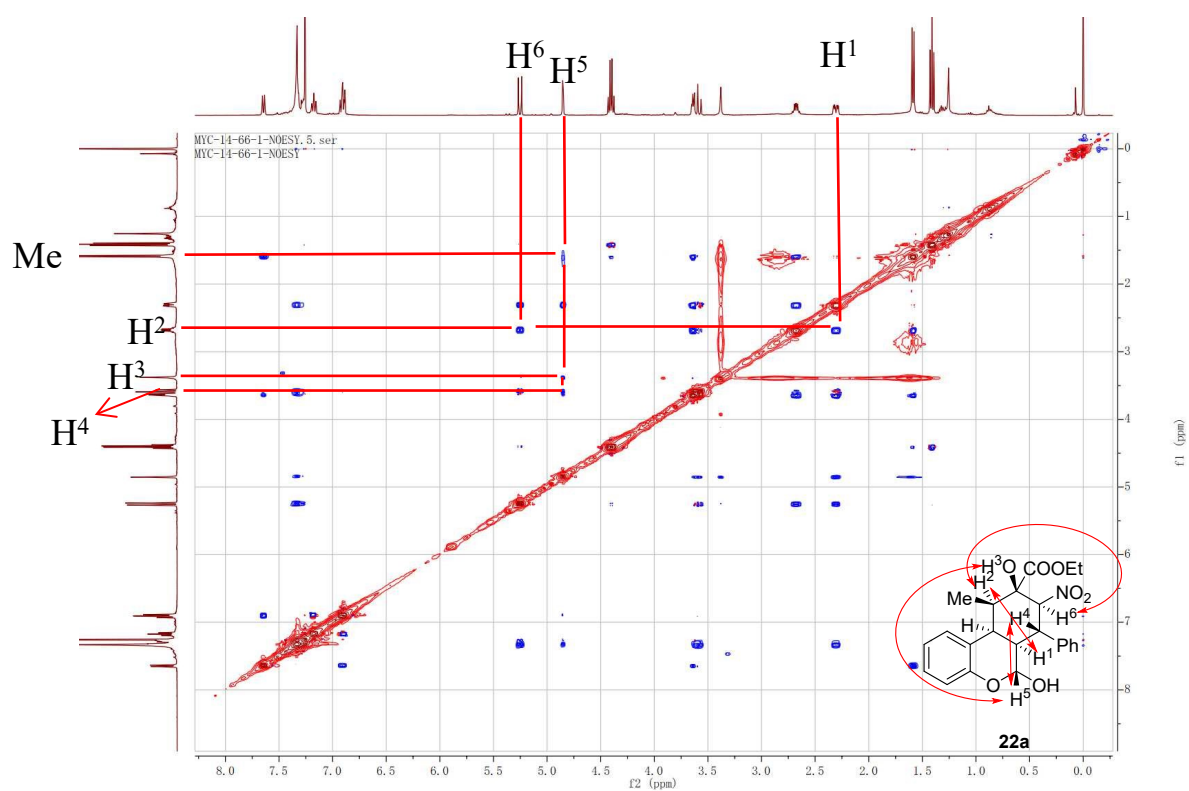

## The HPLC of racemic 22a

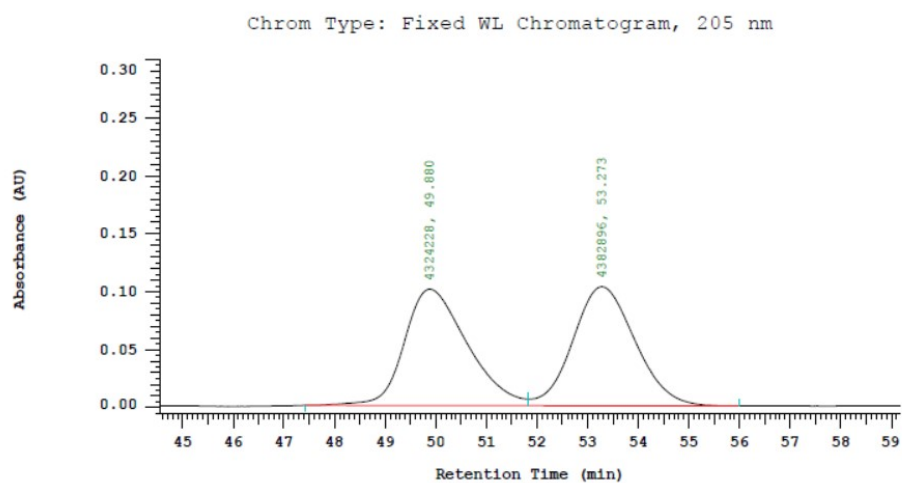

Chrom Type: Fixed WL Chromatogram, 205 nm  
 Peak Quantitation: AREA  
 Calculation Method: AREA%

| No. | RT     | Area    | Area %  | BC |
|-----|--------|---------|---------|----|
| 1   | 49.880 | 4324228 | 49.663  | BV |
| 2   | 53.273 | 4382896 | 50.337  | VB |
|     |        | 8707124 | 100.000 |    |

## The HPLC of chiral 22a

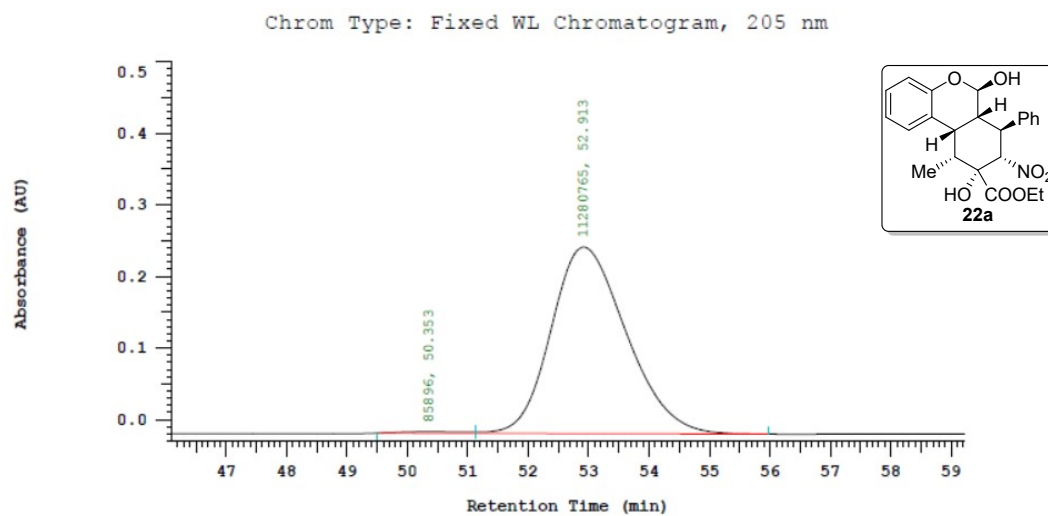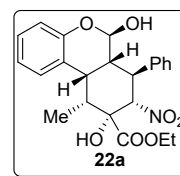

Chrom Type: Fixed WL Chromatogram, 205 nm  
 Peak Quantitation: AREA  
 Calculation Method: AREA%

| No. | RT     | Area     | Area %  | BC |
|-----|--------|----------|---------|----|
| 1   | 50.353 | 85896    | 0.756   | BV |
| 2   | 52.913 | 11280765 | 99.244  | VB |
|     |        | 11366661 | 100.000 |    |

## The $^1\text{H}$ NMR spectrum of 22b (400 MHz, $\text{CDCl}_3$ )

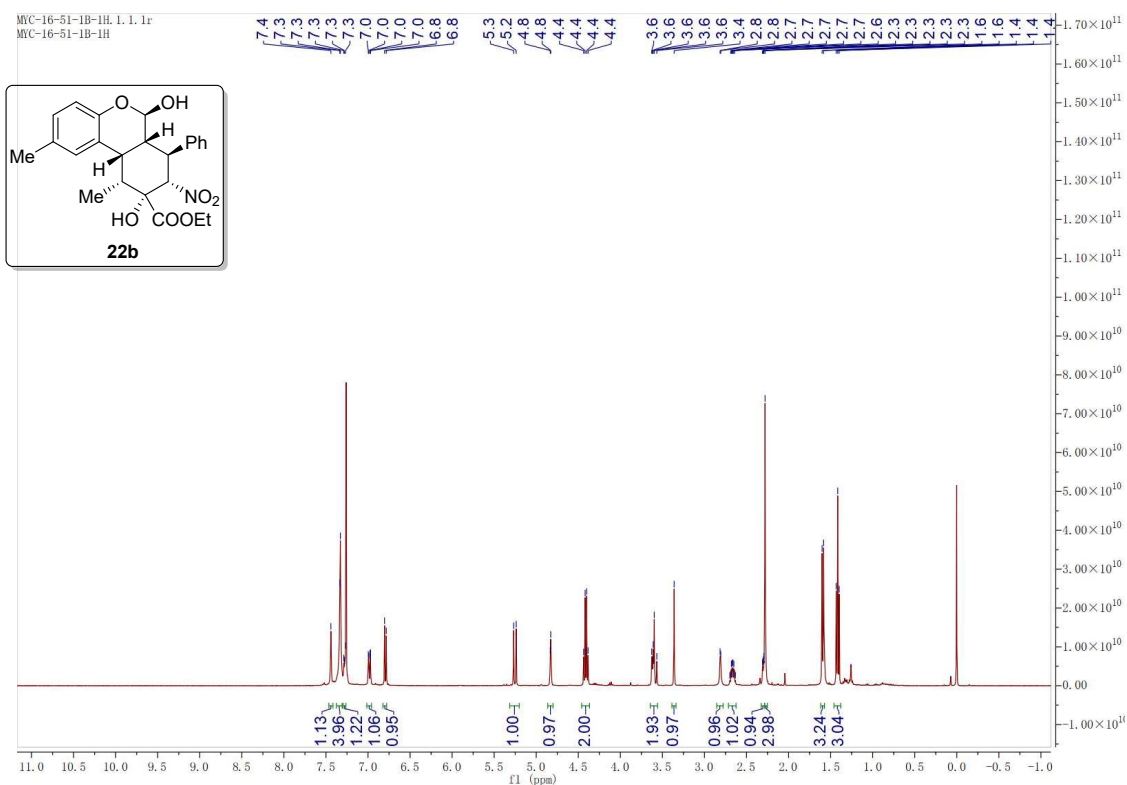

## The $^{13}\text{C}$ NMR spectrum of 22b (100 MHz, $\text{CDCl}_3$ )

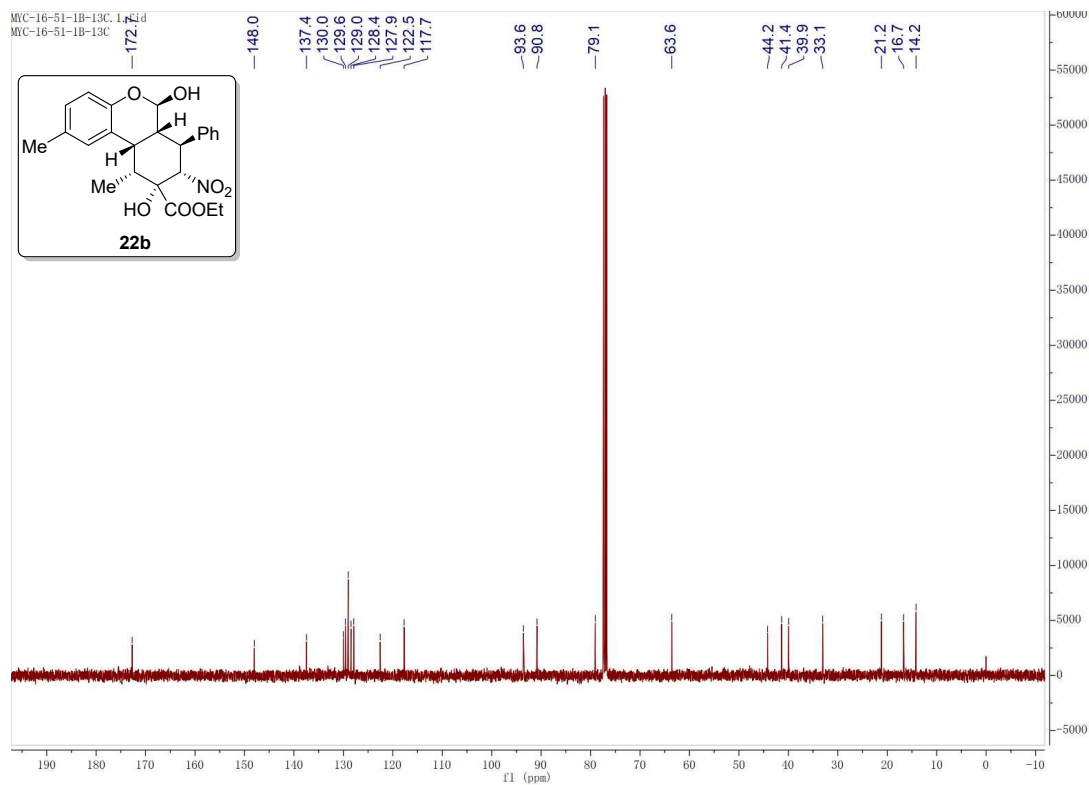

## The HPLC of racemic 22b

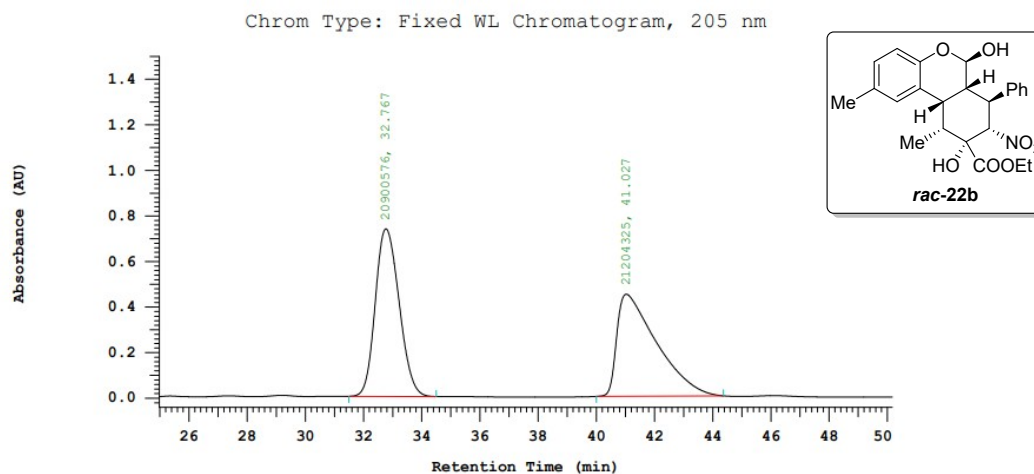

Chrom Type: Fixed WL Chromatogram, 205 nm  
 Peak Quantitation: AREA  
 Calculation Method: AREA%

| No. | RT     | Area     | Area %  | BC |
|-----|--------|----------|---------|----|
| 1   | 32.767 | 20900576 | 49.639  | BB |
| 2   | 41.027 | 21204325 | 50.361  | BB |
|     |        | 42104901 | 100.000 |    |

## The HPLC of chiral 22b

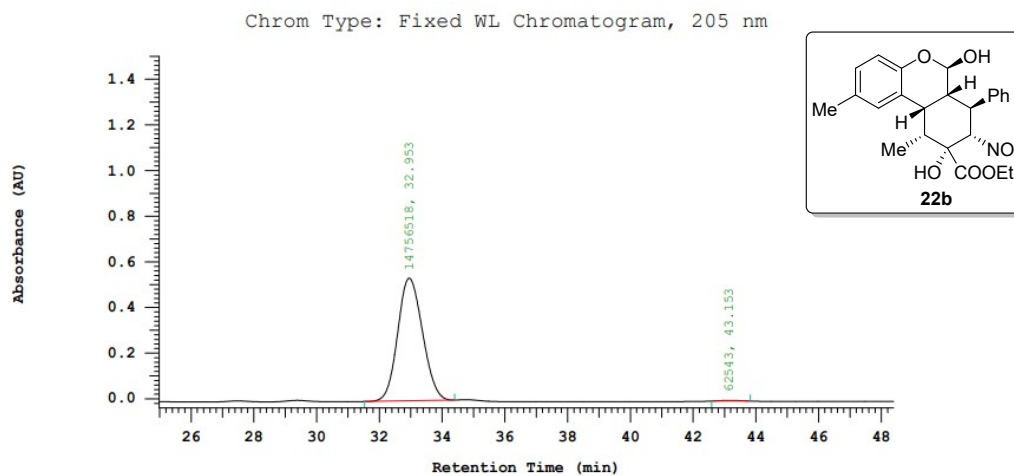

Chrom Type: Fixed WL Chromatogram, 205 nm  
 Peak Quantitation: AREA  
 Calculation Method: AREA%

| No. | RT     | Area     | Area %  | BC |
|-----|--------|----------|---------|----|
| 1   | 32.953 | 14756518 | 99.578  | BB |
| 2   | 43.153 | 62543    | 0.422   | BB |
|     |        | 14819061 | 100.000 |    |



### The $^1\text{H}$ NMR spectrum of 22c (400 MHz, $\text{CDCl}_3$ )

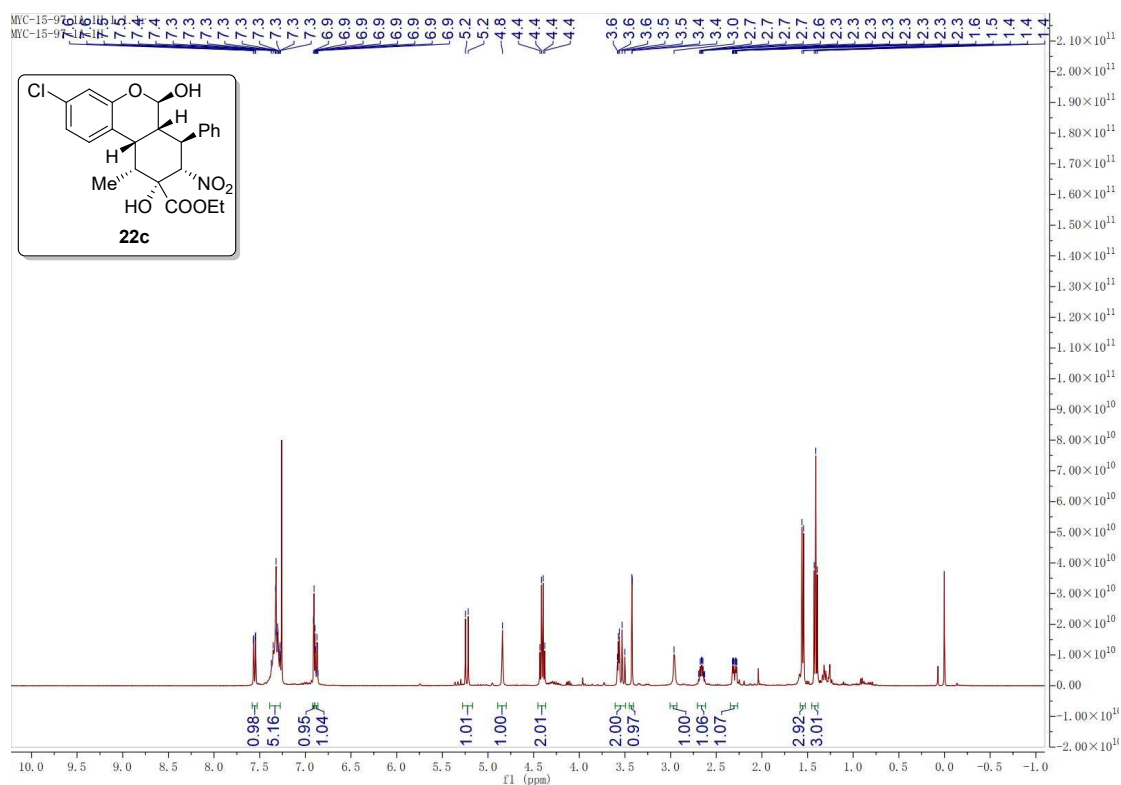

### The $^{13}\text{C}$ NMR spectrum of 22c (100 MHz, $\text{CDCl}_3$ )

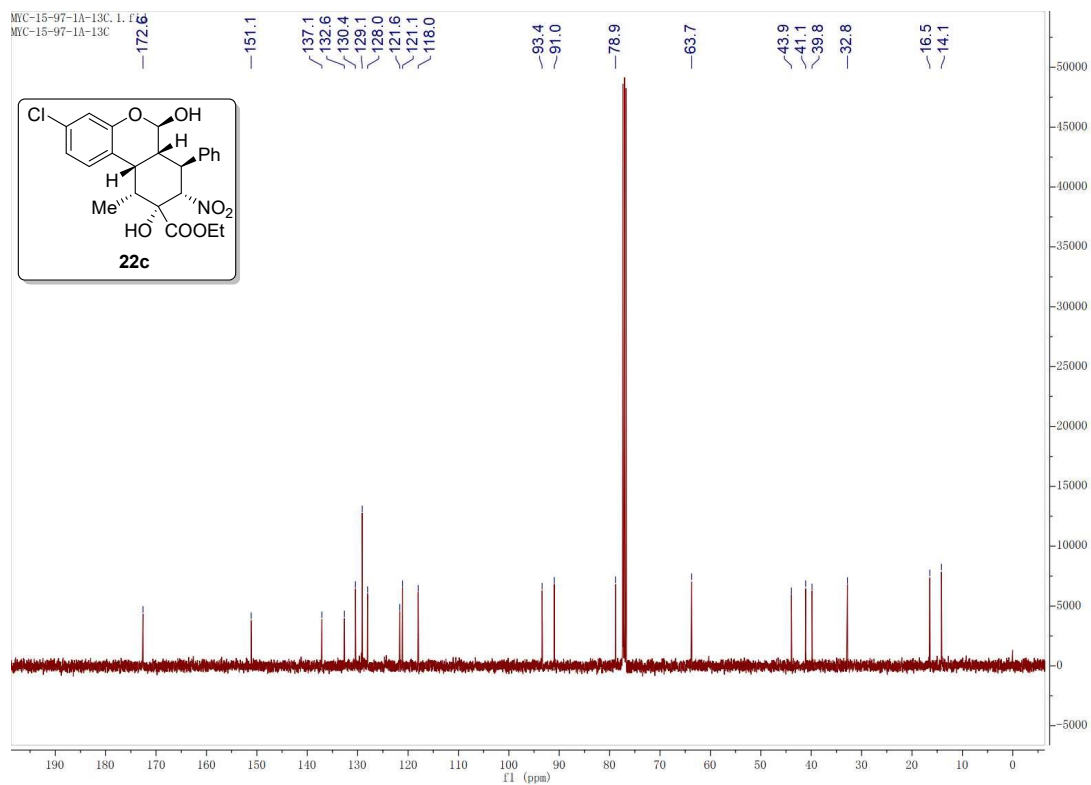

## The HPLC of racemic 22c

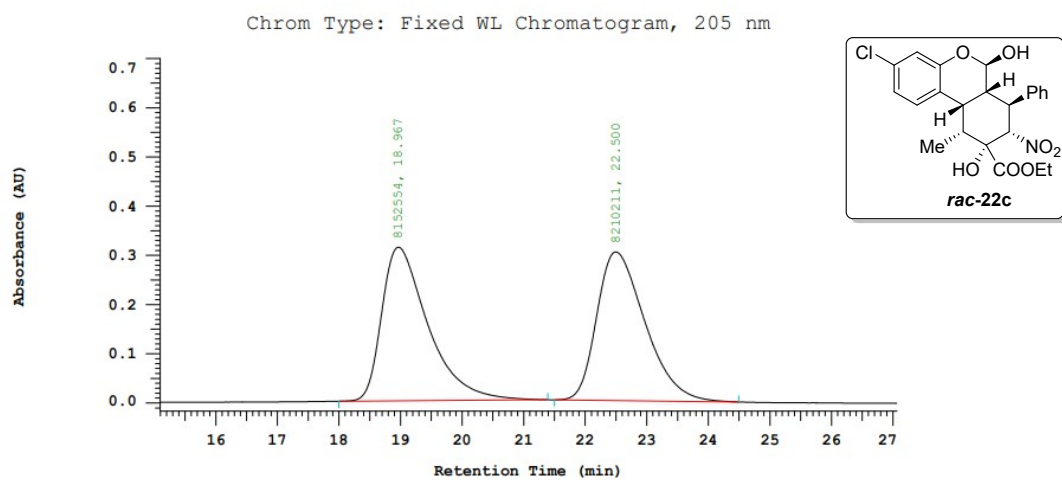

Chrom Type: Fixed WL Chromatogram, 205 nm  
 Peak Quantitation: AREA  
 Calculation Method: AREA%

| No. | RT     | Area     | Area %  | BC |
|-----|--------|----------|---------|----|
| 1   | 18.967 | 8152554  | 49.824  | BB |
| 2   | 22.500 | 8210211  | 50.176  | BB |
|     |        | 16362765 | 100.000 |    |

## The HPLC of chiral 22c

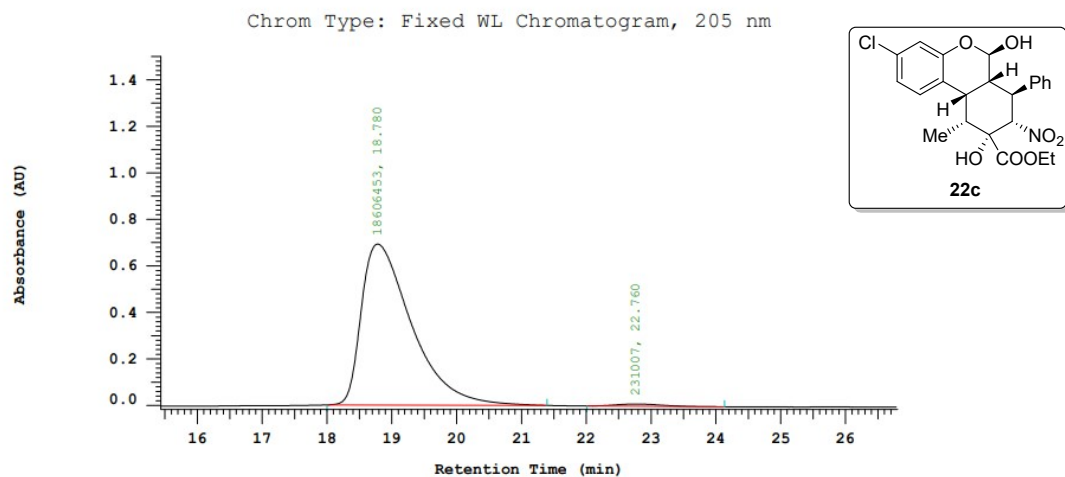

Chrom Type: Fixed WL Chromatogram, 205 nm  
 Peak Quantitation: AREA  
 Calculation Method: AREA%

| No. | RT     | Area     | Area %  | BC |
|-----|--------|----------|---------|----|
| 1   | 18.780 | 18606453 | 98.774  | BB |
| 2   | 22.760 | 231007   | 1.226   | BB |
|     |        | 18837460 | 100.000 |    |

### The $^1\text{H}$ NMR spectrum of 22d (400 MHz, $\text{CDCl}_3$ )

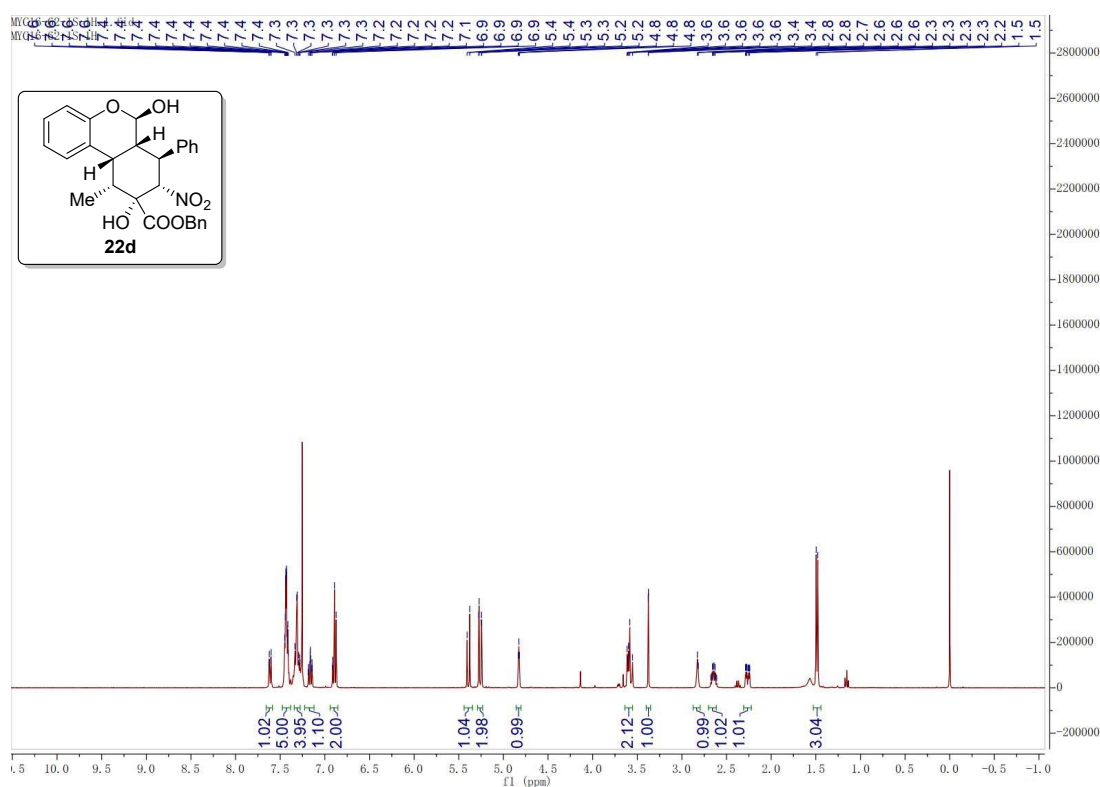

### The $^{13}\text{C}$ NMR spectrum of 22d (100 MHz, $\text{CDCl}_3$ )

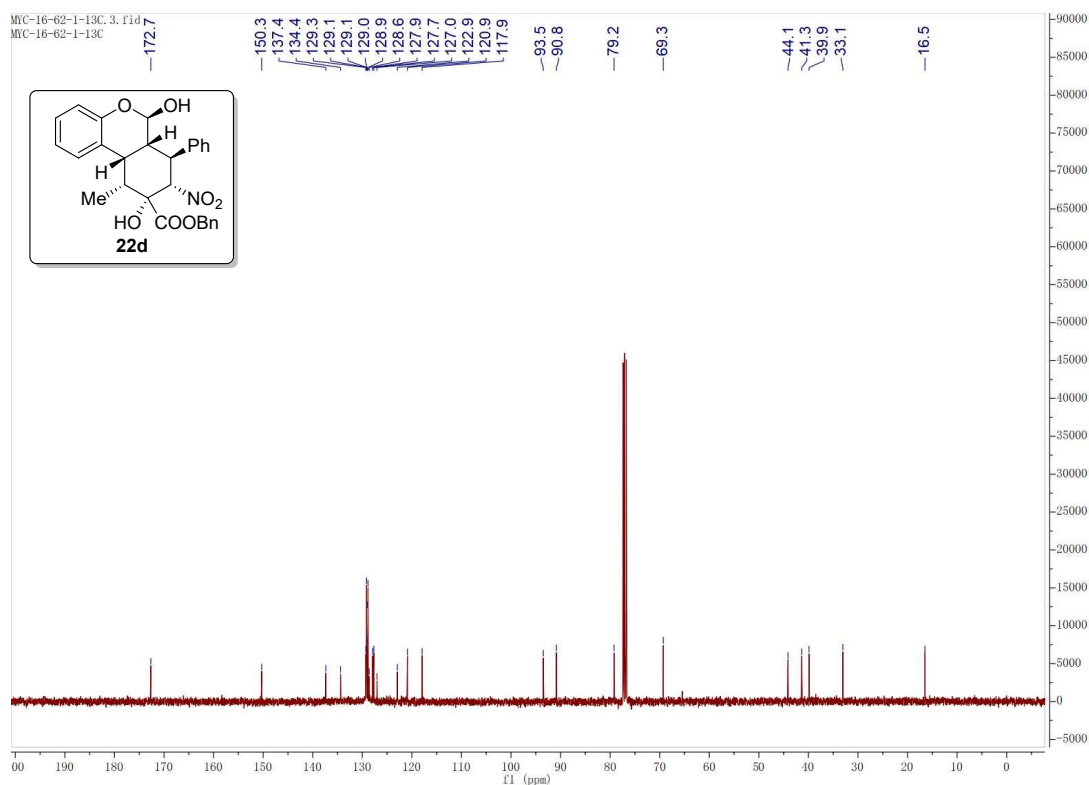

## The HPLC of racemic 22d

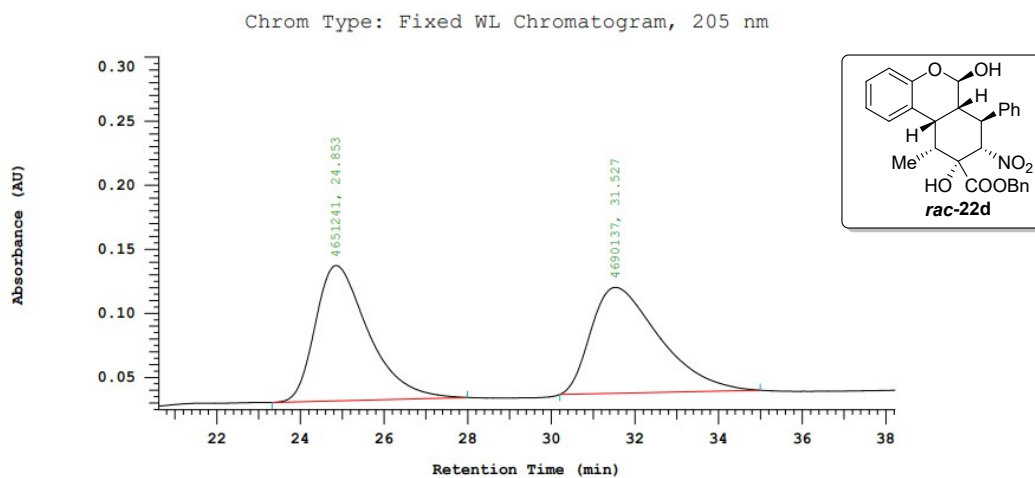

Chrom Type: Fixed WL Chromatogram, 205 nm  
 Peak Quantitation: AREA  
 Calculation Method: AREA%

| No. | RT     | Area    | Area %  | BC |
|-----|--------|---------|---------|----|
| 1   | 24.853 | 4651241 | 49.792  | BB |
| 2   | 31.527 | 4690137 | 50.208  | BB |
|     |        | 9341378 | 100.000 |    |

## The HPLC of chiral 22d

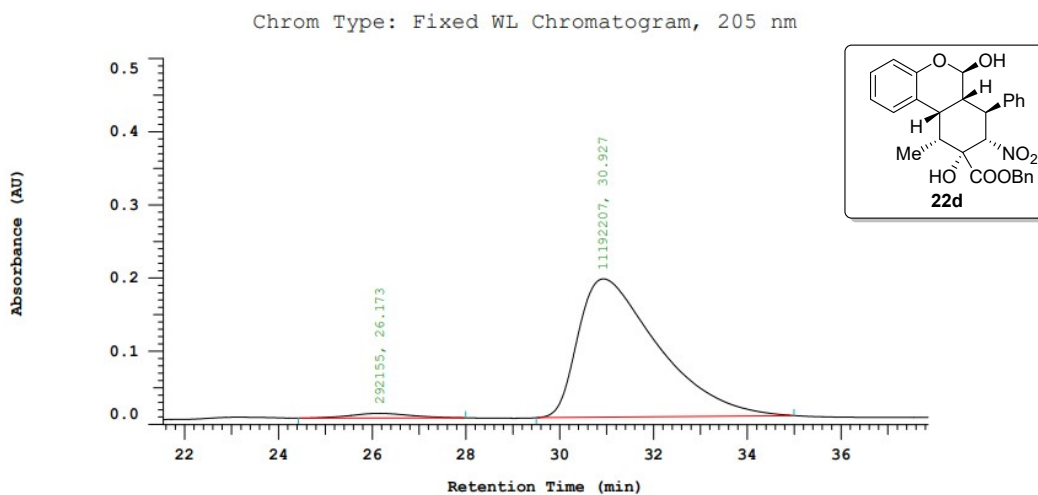

Chrom Type: Fixed WL Chromatogram, 205 nm  
 Peak Quantitation: AREA  
 Calculation Method: AREA%

| No. | RT     | Area     | Area %  | BC |
|-----|--------|----------|---------|----|
| 1   | 26.173 | 292155   | 2.544   | BB |
| 2   | 30.927 | 11192207 | 97.456  | BB |
|     |        | 11484362 | 100.000 |    |

### The $^1\text{H}$ NMR spectrum of 22e (400 MHz, $\text{CDCl}_3$ )

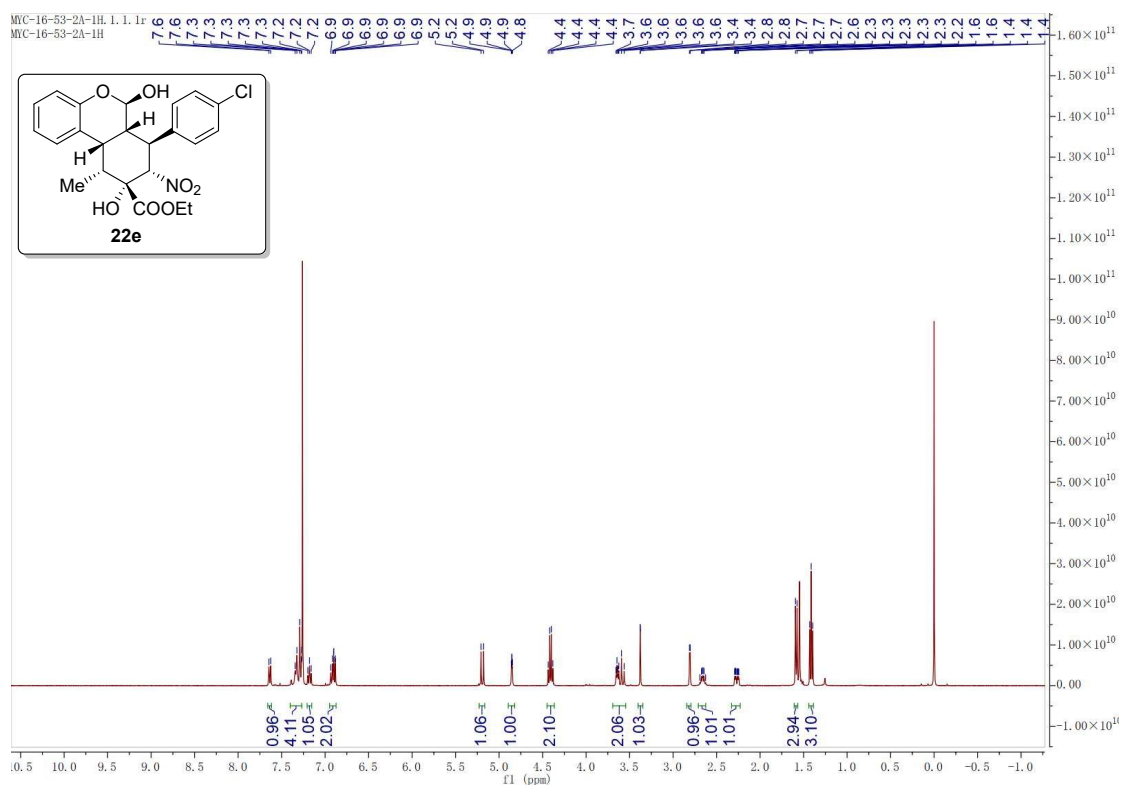

### The $^{13}\text{C}$ NMR spectrum of 22e (100 MHz, $\text{CDCl}_3$ )

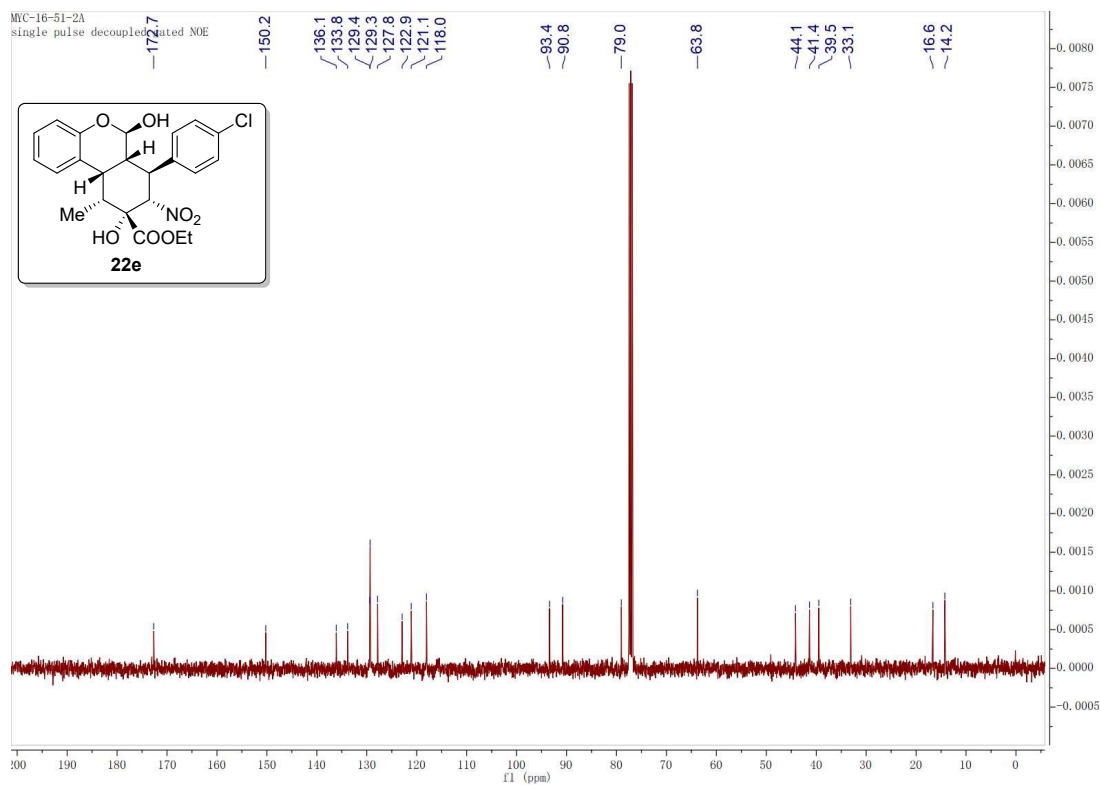

## The HPLC of racemic 22e

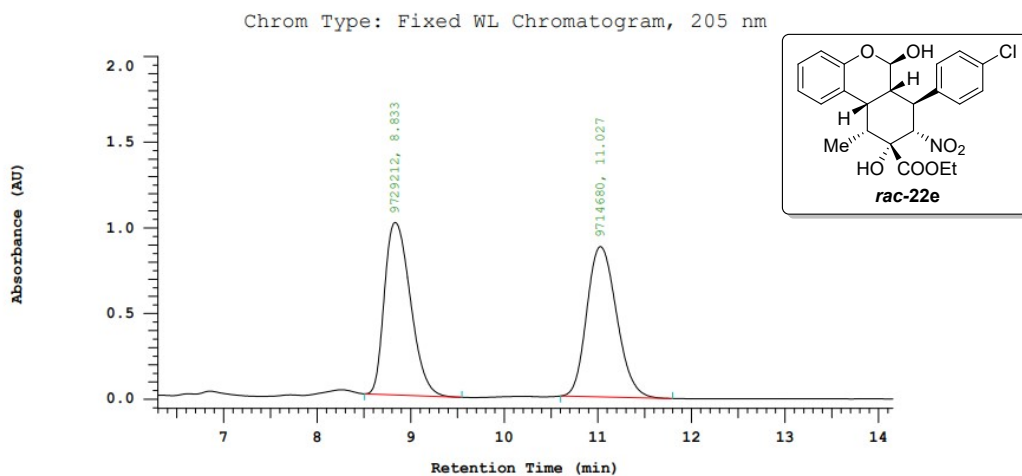

Chrom Type: Fixed WL Chromatogram, 205 nm  
Peak Quantitation: AREA  
Calculation Method: AREA%

| No. | RT     | Area     | Area %  | BC |
|-----|--------|----------|---------|----|
| 1   | 8.833  | 9729212  | 50.037  | BB |
| 2   | 11.027 | 9714680  | 49.963  | BB |
|     |        | 19443892 | 100.000 |    |

## The HPLC of chiral 22e

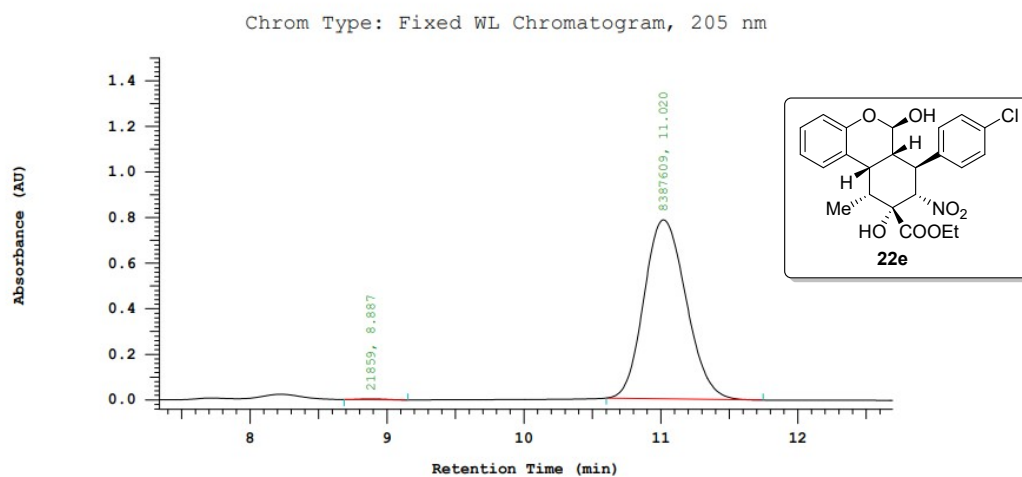

Chrom Type: Fixed WL Chromatogram, 205 nm  
Peak Quantitation: AREA  
Calculation Method: AREA%

| No. | RT     | Area    | Area %  | BC |
|-----|--------|---------|---------|----|
| 1   | 8.887  | 21859   | 0.260   | BB |
| 2   | 11.020 | 8387609 | 99.740  | BB |
|     |        | 8409468 | 100.000 |    |

### The $^1\text{H}$ NMR spectrum of 22f (400 MHz, $\text{CDCl}_3$ )

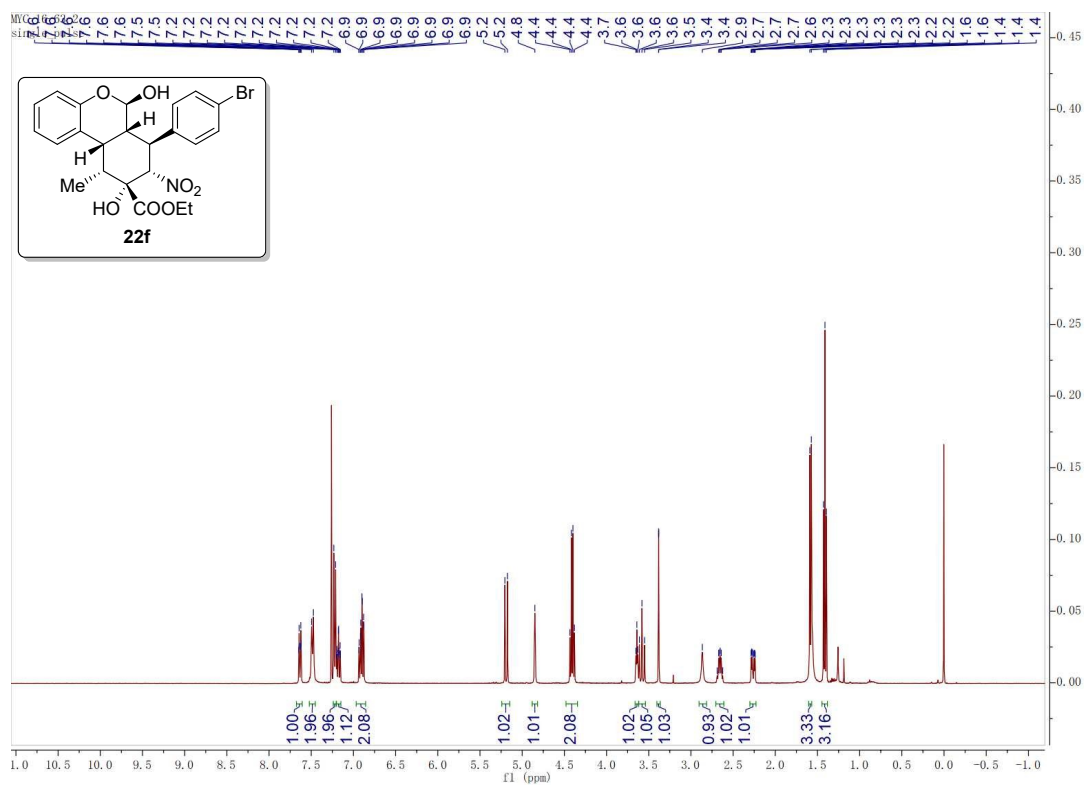

### The $^{13}\text{C}$ NMR spectrum of 22f (100 MHz, $\text{CDCl}_3$ )

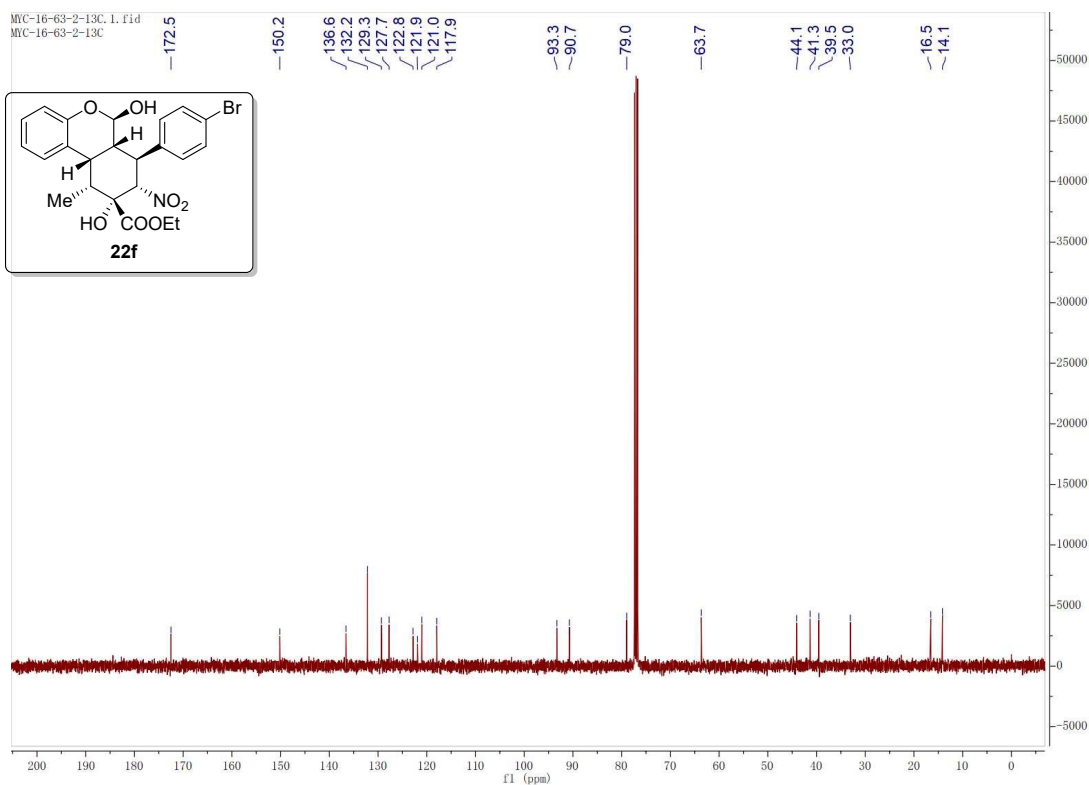

## The HPLC of racemic 22f

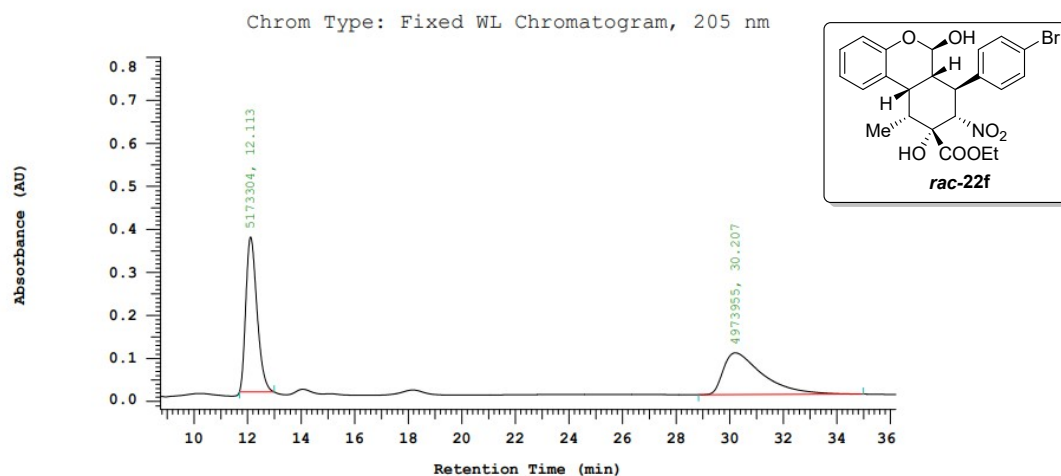

Chrom Type: Fixed WL Chromatogram, 205 nm  
 Peak Quantitation: AREA  
 Calculation Method: AREA%

| No. | RT     | Area     | Area %  | BC |
|-----|--------|----------|---------|----|
| 1   | 12.113 | 5173304  | 50.982  | BB |
| 2   | 30.207 | 4973955  | 49.018  | BB |
|     |        | 10147259 | 100.000 |    |

## The HPLC of chiral 22f

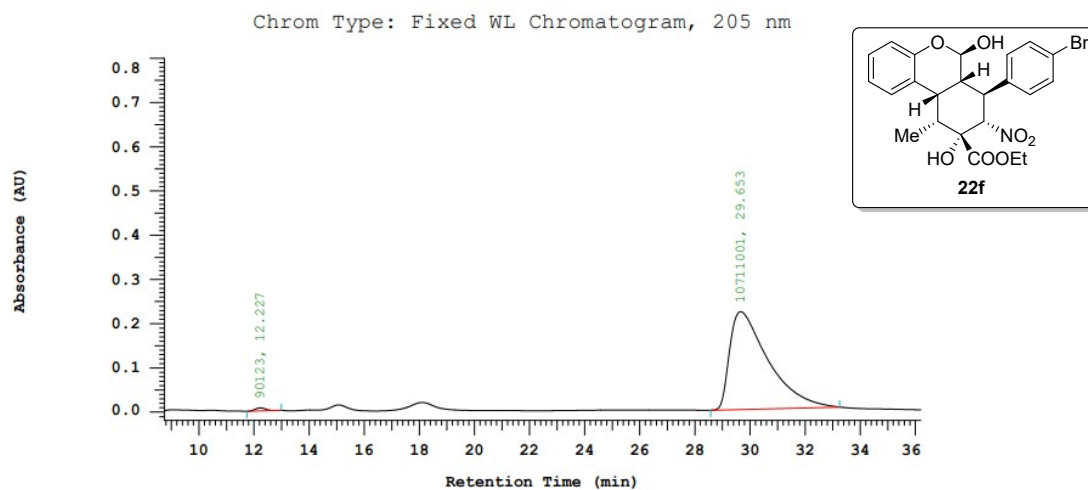

Chrom Type: Fixed WL Chromatogram, 205 nm  
 Peak Quantitation: AREA  
 Calculation Method: AREA%

| No. | RT     | Area     | Area %  | BC |
|-----|--------|----------|---------|----|
| 1   | 12.227 | 90123    | 0.834   | BB |
| 2   | 29.653 | 10711001 | 99.166  | BB |
|     |        | 10801124 | 100.000 |    |



### The $^1\text{H}$ NMR spectrum of 22g (400 MHz, $\text{CDCl}_3$ )

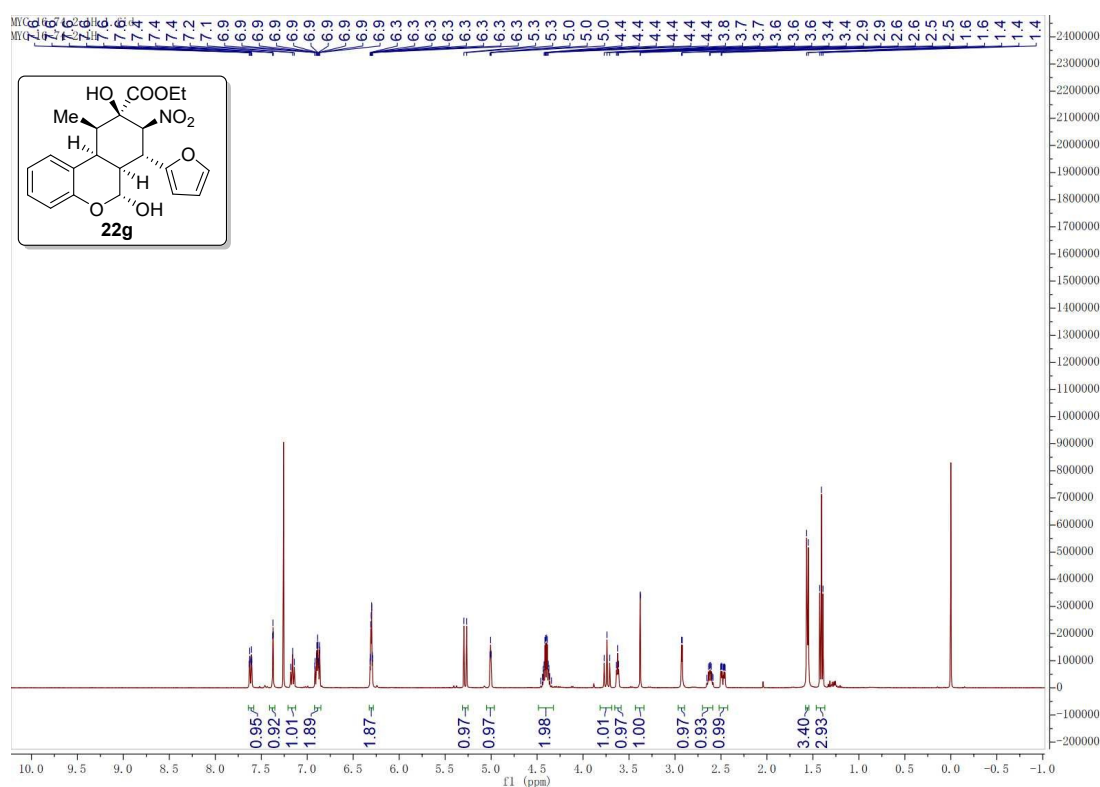

### The $^{13}\text{C}$ NMR spectrum of 22g (100 MHz, $\text{CDCl}_3$ )

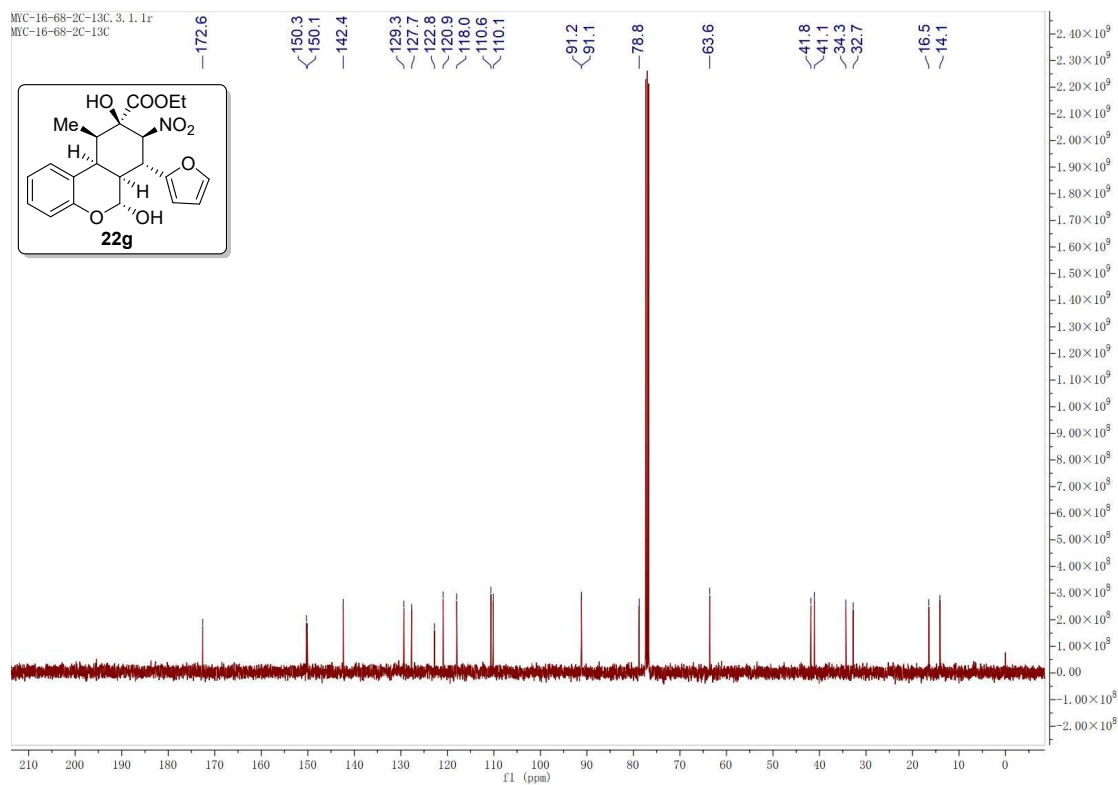

## The HPLC of racemic 22g

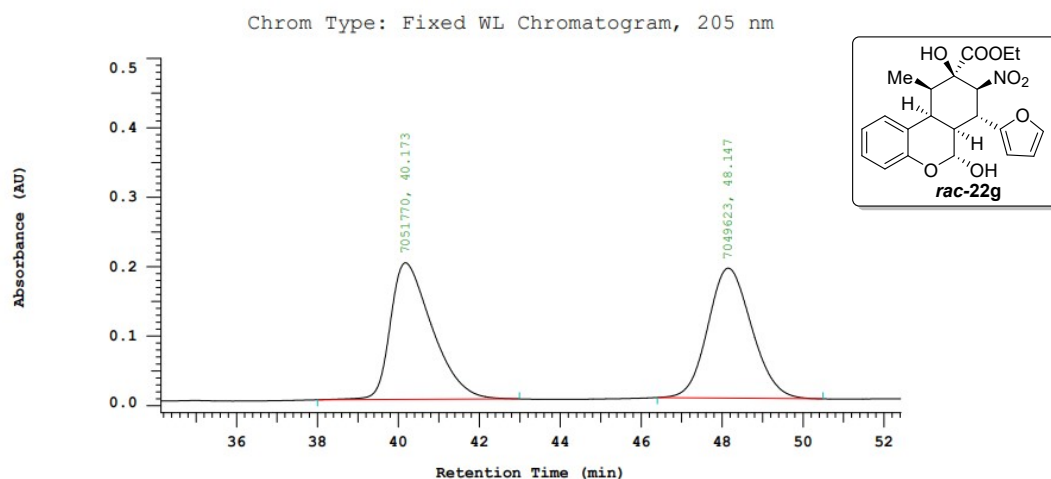

Chrom Type: Fixed WL Chromatogram, 205 nm  
 Peak Quantitation: AREA  
 Calculation Method: AREA%

| No. | RT     | Area     | Area %  | BC |
|-----|--------|----------|---------|----|
| 1   | 40.173 | 7051770  | 50.008  | BB |
| 2   | 48.147 | 7049623  | 49.992  | BB |
|     |        | 14101393 | 100.000 |    |

## The HPLC of chiral 22g

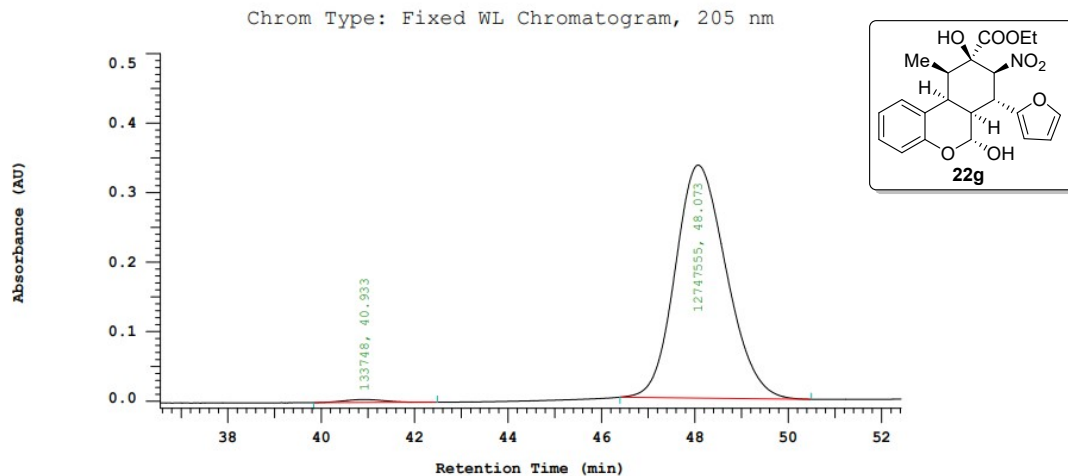

Chrom Type: Fixed WL Chromatogram, 205 nm  
 Peak Quantitation: AREA  
 Calculation Method: AREA%

| No. | RT     | Area     | Area %  | BC |
|-----|--------|----------|---------|----|
| 1   | 40.933 | 133748   | 1.038   | BB |
| 2   | 48.073 | 12747555 | 98.962  | BB |
|     |        | 12881303 | 100.000 |    |

## J. Single crystal X-Ray diffraction data

**Single crystal preparation:** **6h** was dissolved in CH<sub>2</sub>Cl<sub>2</sub> (0.1 mL), diluted with MeOH (1 mL), sealed, cultured in standing, and the solvent was volatilized at room temperature. After a week, single crystals were formed.

**The instrumentation used:** Gemini E/Eos of Rigaku.

[CCDC 2210634 contain the supplementary crystallographic data for this paper. These data can be obtained free of charge from The Cambridge Crystallographic Data Centre via [www.ccdc.cam.ac.uk/data\\_request/cif](http://www.ccdc.cam.ac.uk/data_request/cif).]

Absolute configuration of **6h** - CCDC 2210634

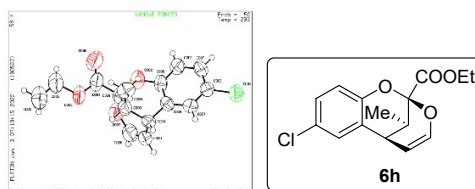

|                                                               |                         |                        |                           |
|---------------------------------------------------------------|-------------------------|------------------------|---------------------------|
| Bond precision:                                               | C-C = 0.0138 Å          | Wavelength=1.54184     |                           |
| Cell:                                                         | a=6.0599(8)<br>alpha=90 | b=13.909(2)<br>beta=90 | c=17.1498(18)<br>gamma=90 |
| Temperature:                                                  | 293 K                   |                        |                           |
|                                                               | Calculated              | Reported               |                           |
| Volume                                                        | 1445.5(3)               | 1445.5(3)              |                           |
| Space group                                                   | P 21 21 21              | P 21 21 21             |                           |
| Hall group                                                    | P 2ac 2ab               | P 2ac 2ab              |                           |
| Moiety formula                                                | C15 H15 Cl O4           | C15 H15 Cl O4          |                           |
| Sum formula                                                   | C15 H15 Cl O4           | C15 H15 Cl O4          |                           |
| Mr                                                            | 294.72                  | 294.72                 |                           |
| Dx, g cm-3                                                    | 1.354                   | 1.354                  |                           |
| Z                                                             | 4                       | 4                      |                           |
| Mu (mm-1)                                                     | 2.439                   | 2.439                  |                           |
| F000                                                          | 616.0                   | 616.0                  |                           |
| F000'                                                         | 619.28                  |                        |                           |
| h,k,lmax                                                      | 7,17,21                 | 7,16,20                |                           |
| Nref                                                          | 2788[ 1635]             | 2226                   |                           |
| Tmin,Tmax                                                     | 0.677,0.784             | 0.680,1.000            |                           |
| Tmin'                                                         | 0.585                   |                        |                           |
| Correction method= # Reported T Limits: Tmin=0.680 Tmax=1.000 |                         |                        |                           |
| AbsCorr = MULTI-SCAN                                          |                         |                        |                           |
| Data completeness=                                            | 1.36/0.80               | Theta(max)= 70.940     |                           |
| R(reflections)=                                               | 0.0656( 1138)           | wR2(reflections)=      |                           |
|                                                               |                         | 0.2282( 2226)          |                           |
| S =                                                           | 1.137                   | Npar= 184              |                           |

## K. Proposed reaction mechanism

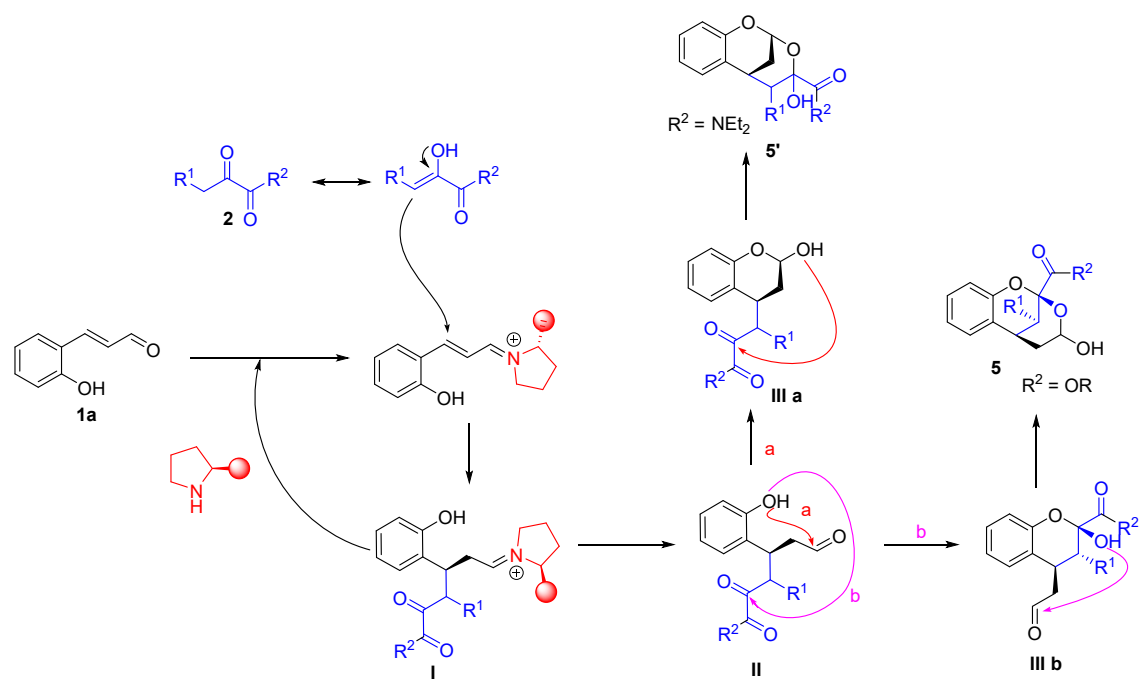

Supplement: d3cc02739b2.pdf [file d3cc02739b2.pdf]
